# Supplementary material for: Synthesis of axially chiral thiourea by NHC-catalyzed desymmetrizative amidation
Source: Royal Society of Chemistry journal article supplement (doi:10.1039/d4gc03113j), 2024-01-01
Supplement: d4gc03113j1.pdf [file d4gc03113j1.pdf]

## Supporting Information

### **Synthesis of Axially Chiral Thiourea by NHC-Catalyzed**

#### **Desymmetrization of Amidation**

Yingtao Wu<sup>a</sup>, Xin Guan<sup>a</sup>, Kehan Jiao<sup>b</sup>, Huaqiu Zhao<sup>a</sup>, Mingrui Li<sup>a</sup>, Jiaqiong Sun<sup>b</sup>,  
Guangfan Zheng<sup>\*,a</sup> and Qian Zhang<sup>a,c</sup>

<sup>a</sup> Jilin Province Key Laboratory of Organic Functional Molecular Design & Synthesis, Department of Chemistry, Northeast Normal University, Changchun 130024, China

E-mail: zhenggf265@nenu.edu.cn

<sup>b</sup> School of Environment, Northeast Normal University, Changchun 130117, China

<sup>c</sup> State Key Laboratory of Organometallic Chemistry, Shanghai Institute of Organic Chemistry, Chinese Academy of Sciences 345 Lingling Lu, Shanghai 200032, China

## Table of Contents

|                                                                                                                                                       |            |
|-------------------------------------------------------------------------------------------------------------------------------------------------------|------------|
| <b>I. General Information</b>                                                                                                                         | <b>S1</b>  |
| <b>II. Experimental Section</b>                                                                                                                       | <b>S2</b>  |
| <b>III. Synthetic Applications</b>                                                                                                                    | <b>S51</b> |
| <b>IV. Mechanistic Studies</b>                                                                                                                        | <b>S62</b> |
| <b>V. Determination of Rotational Barrier and half-life</b>                                                                                           | <b>S75</b> |
| <b>VI. X-Ray Crystallographic Data of 3ah</b>                                                                                                         | <b>S81</b> |
| <b>VII. References</b>                                                                                                                                | <b>S82</b> |
| <b>VIII. <math>^1\text{H}</math>, <math>^{13}\text{C}</math>, <math>^{19}\text{F}</math>, <math>^{31}\text{P}</math> NMR Spectra of New Compounds</b> | <b>S83</b> |

## I. General Information.

All reactions were performed under nitrogen atmosphere in flame dried flasks. All reactions were monitored by thin layer chromatography (TLC) using Macherey-Nagel 0.20 mm silica gel 60 plates. Flash column chromatography was performed on silica gel 60 (particle size 300-400 mesh ASTM, purchased from Taizhou, China).  $^1\text{H}$ ,  $^{13}\text{C}$ ,  $^{19}\text{F}$  spectra were recorded with Varian 500 MHz (Inova-500) or Bruker 600 MHz (Avance-600) instrument. Chemical shifts were referenced to  $\delta_{\text{TMS}} = 0.00$  ppm ( $^1\text{H}$ ,  $^{13}\text{C}$ ). Chemical shifts ( $\delta$ ) are reported in ppm. Coupling constants ( $J$ ) are reported in Hz. Dichloromethane- $d_2$  ( $\delta$  ( $^1\text{H}$ ) = 5.32 ppm,  $\delta$  ( $^{13}\text{C}$ ) = 53.8 ppm), chloroform- $d_1$  ( $\delta$  ( $^1\text{H}$ ) = 7.26 ppm,  $\delta$  ( $^{13}\text{C}$ ) = 77.2 ppm) or methanol- $d_4$  ( $\delta$  ( $^1\text{H}$ ) = 3.31 ppm,  $\delta$  ( $^{13}\text{C}$ ) = 49.0 ppm) were used as solvents. The following abbreviations are used to describe peak patterns as appropriate: s = singlet, d = doublet, t = triplet, q = quartet, m = multiplet, dd = doublet of doublet, dt = triplet of doublet, td = doublet of triplet, bs = broad singlet. High-pressure liquid chromatography (HPLC) was performed on Agilent 1200 Series chromatographs using a chiral column (25 cm) as noted for each compound. High-resolution mass spectra HRMS (ESI-TOF) were recorded on Bruker microtof. Compounds were visualized by irradiation with UV light, or stained with iodine/silica gel, or potassium permanganate. Preparatory thin-layer chromatography (Prep-TLC) was performed on silica gel GF with UV 254 (20  $\times$  20 cm, 1000 microns, from Yantai Jiang you Silica Gel Development Co., Ltd.) and visualized with UV light. Optical rotations were reported as follows:  $[\alpha]_{\text{D}}^{\text{T}} = (c: \text{g}/100 \text{ mL in } \text{CH}_2\text{Cl}_2)$ .

## II. Experimental Section

### 2.1 Synthesis of Starting Materials

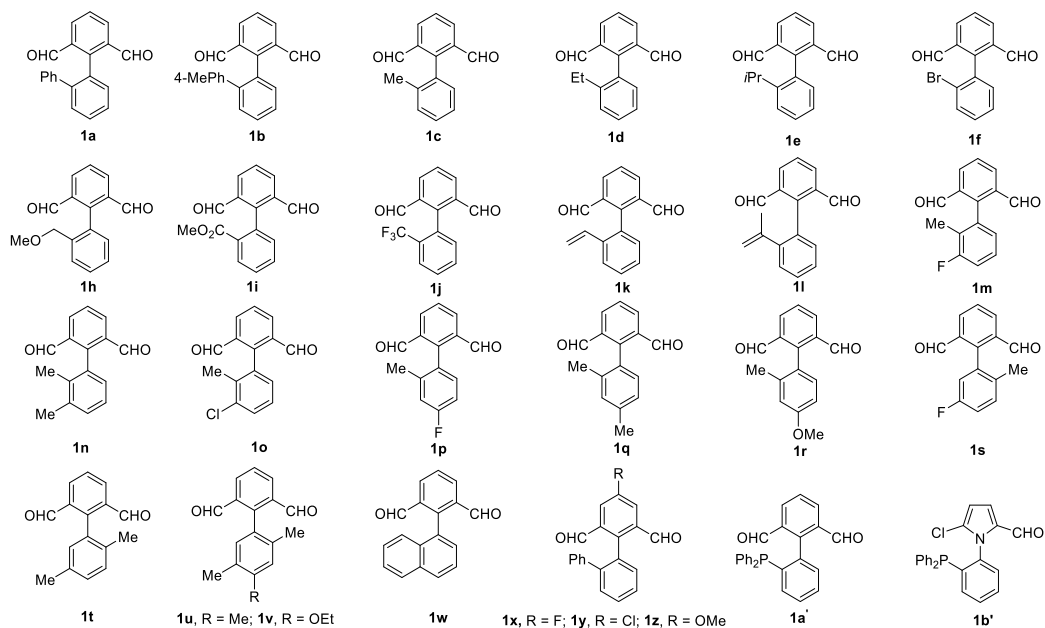

Figure S1. List of starting materials

#### 2.1.1 General procedure for the synthesis of Substrates 1a-h and 1j-w.<sup>[1]</sup> Preparation of 1a is shown as a representative example.

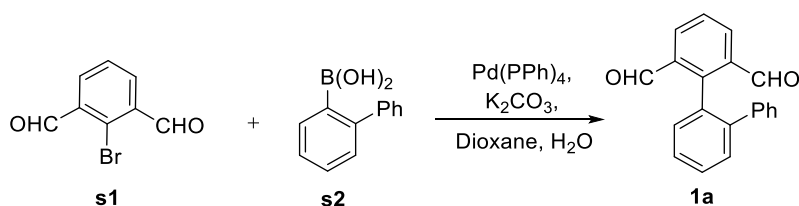

A 250 mL round-bottom Schlenk flask was charged with 2-bromoisophthalaldehyde (2.13 g, 10.0 mmol), 2-biphenylboronic acid (4.536 g, 22.9 mmol),  $K_2CO_3$  (9.59 g, 68.9 mmol) and  $Pd(PPh_3)_4$  (0.21 g, 0.18 mmol) and was evacuated and charged with argon three times. Then degassed 1,4-dioxane (112 mL) and water (15 mL) were added and the reaction was heated at 95 °C for 3 days under argon atmosphere. After cooling to room temperature, the mixture was poured into water and extracted with DCM three times. The organic layer was washed with brine and dried over anhydrous  $MgSO_4$ . The solvent was removed under vacuum. The residue was purified by silica gel column chromatography (ethyl acetate : cyclohexane = 1:20 to 1:10) and washed with ethanol to give compound as a white solid (2.3 g, yield: 81 %).

#### 2.1.2 Procedure for the synthesis of Substrates 1i.

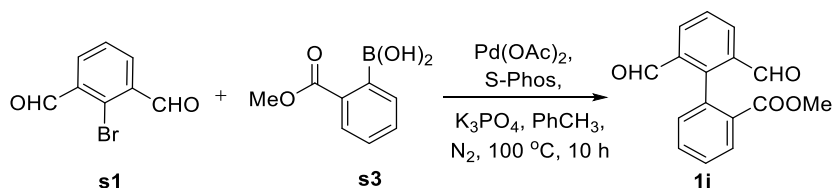

A 25 mL round-bottom Schlenk flask was charged with 2-bromoisophthalaldehyde **s1** (0.639 g, 3.0

mmol), 2-methoxycarbonylphenylboronic acid **s3** (1.35 g, 2.5 equiv), S-Phos (0.124 g, 10 mol%), K<sub>3</sub>PO<sub>4</sub> (3.82 g, 6.0 equiv) and Pd(OAc)<sub>2</sub> (0.034 g, 5 mol%) and was evacuated and charged with argon three times. Then degassed toluene (12 mL) were added and the reaction was heated at 100 °C for 10 h under argon atmosphere. After cooling to room temperature, the mixture was poured into water and extracted with DCM three times. The organic layer was washed with brine and dried over anhydrous MgSO<sub>4</sub>. The solvent was removed under vacuum. The residue was purified by silica gel column chromatography (ethyl acetate : cyclohexane = 1:20 to 1:10) and washed with ethanol to give compound as a white solid (0.57 g, yield: 71 %).

### 2.1.3 General procedure for the synthesis of Substrates 1x-z.<sup>[2b]</sup> Preparation of 1z is shown as a representative example.

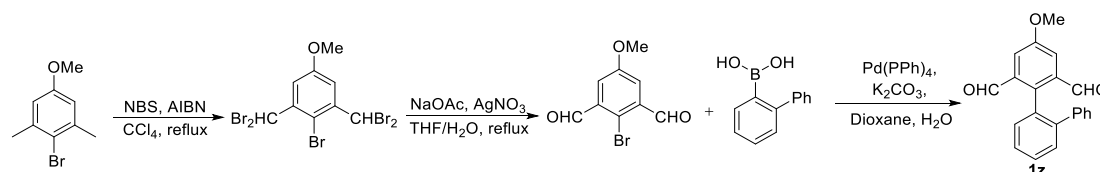

2-bromo-5-methoxy-1,3-dimethylbenzene (5 mmol), NBS (4.5 equiv.) and AIBN (50 mol%) cat. were dissolved in CCl<sub>4</sub> (50 mL) and refluxed for 16 h, The mixture was cooled and the precipitated succinimide was removed by filtration. The solvent was removed under reduced pressure to give a brown oil which was purified by flash column chromatography (petroleum ether) to give the corresponding brominated compound (69% yield);

2-bromo-1,3-bis(dibromomethyl)-5-methoxybenzene (3.4 mmol), sodium acetate (8.5 equiv.) and silver nitrate (16.1 equiv.) were dissolved in a mixture of THF and H<sub>2</sub>O (5:1). The mixture was heated at reflux for 24 h. The inorganic precipitate was filtered, washed, and the solvent was removed in vacuo. The crude mixture was purified by flash column chromatography (ethyl acetate : petroleum ether = 1:10 to 1:20) to give the 2-bromo-5-methoxyisophthalaldehyde (92% yield);

2-bromo-5-methoxyisophthalaldehyde (3.1 mmol), 2-biphenylboronic acid (2.29 equiv), K<sub>2</sub>CO<sub>3</sub> (9.59 g, 6.89 equiv) and Pd(PPh<sub>3</sub>)<sub>4</sub> (0.018 mmol) and was evacuated and charged with argon three times. Then degassed 1,4-dioxane (33 mL) and water (5 mL) were added and the reaction was heated at 95 °C for 3 days under argon atmosphere. After cooling to room temperature, the mixture was poured into water and extracted with DCM three times. The organic layer was washed with brine and dried over anhydrous MgSO<sub>4</sub>. The solvent was removed under vacuum. The residue was purified by silica gel column chromatography (ethyl acetate : petroleum ether = 1:20 to 1:10) and washed with ethanol to give compound as a light yellow solid (0.5 g, yield: 51 %).

### 2.1.4 Procedure for the synthesis of Substrates 1a'.

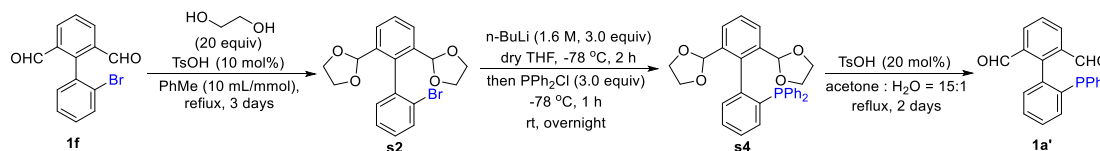

To a solution of 5-bromoisatin (1.44 g, 5 mmol) in toluene (50 mL), ethylene glycol (5.6 mL, 100 mmol) and p-toluenesulphonic acid (86.1 mg, 0.5 mmol) were added. The reaction mixture was refluxed for 3 days and then evaporated to dryness. The residue was diluted with dichloromethane and washed with saturated sodium bicarbonate solution. The aqueous layer was extracted with dichloromethane three times. The combined organic extracts were dried over anhydrous sodium sulfate, filtered, and evaporated. The crude mixture was purified using column chromatography to

give the product **s2**. Yield: 55%.

To a distilled THF solution (14 mL) of **s2** (2.75 mmol) was added dropwise nBuLi (5.2 mL, 8.25 mmol, 1.6 M in hexane) at -78 °C under N<sub>2</sub> atmosphere. The reaction mixture was stirred for 2 hour, then Ph<sub>2</sub>PCl (8.25 mmol) was added at -78 °C, then the temperature was slowly raised to room temperature and stirred overnight, The reaction mixture was quenched with saturated aqueous ammonium chloride solution and extracted using ethyl acetate. The organic extracts were combined dried over with anhydrous sodium sulphate and concentrated in vacuo, the residual viscous crude product was purified by silica gel chromatography using petroleum ether/ethyl acetate 20:1-10:1 (v/v) to give the product **s4** (yield: 10%, 0.24 mmol).

**s4** was dissolved in acetone/water (2 mL, 15:1) mixture in a flame-dried screw-cap reaction tube equipped with a Teflon-coated magnetic stir bar, TsOH (20% mmol) was added and stirred at 60 °C for 2 days. The reaction mixture was quenched with saturated aqueous sodium bicarbonate solution and extracted with ethyl acetate. The organic extracts were combined, dried over anhydrous sodium sulphate and concentrated. The crude product was purified by silica gel column chromatography using petroleum ether/ethyl acetate (5:1) as eluent to afford compounds **1a'** (yield: 50%, 0.12 mmol).

### 2.1.5 Procedure for the synthesis of Substrates **1b'**.<sup>[3]</sup>

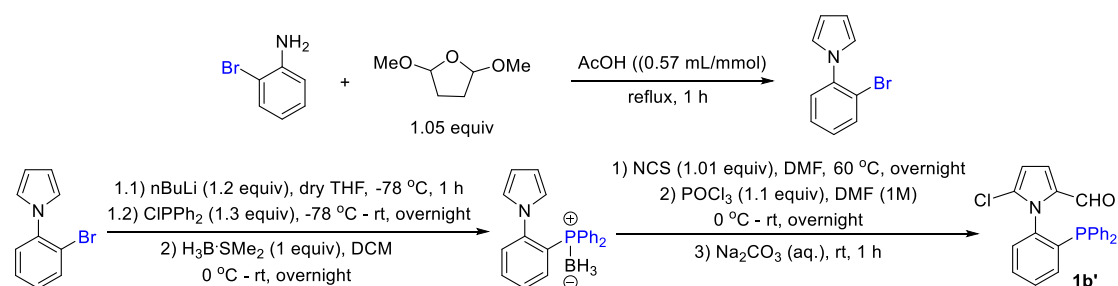

### 2.1.6 Characterization data of the substrates

#### 2'-ethyl-[1,1'-biphenyl]-2,6-dicarbaldehyde

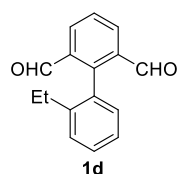

**1d**: light green solid; <sup>1</sup>H NMR (600 MHz, Chloroform-*d*) δ 9.71 (d, *J* = 0.8 Hz, 2H), 8.27 (d, *J* = 7.7 Hz, 2H), 7.68 (t, *J* = 7.7 Hz, 1H), 7.47 (td, *J* = 7.6, 1.4 Hz, 1H), 7.41 (dd, *J* = 7.9, 1.2 Hz, 1H), 7.33 (td, *J* = 7.5, 1.3 Hz, 1H), 7.22 (dd, *J* = 7.5, 1.3 Hz, 1H), 2.36 (q, *J* = 7.6 Hz, 2H), 1.02 (t, *J* = 7.6 Hz, 3H). <sup>13</sup>C NMR (150 MHz, Chloroform-*d*) δ 191.05, 147.88, 143.01, 134.91, 132.71, 131.71, 130.86, 129.74, 128.85, 128.64, 126.09, 26.72, 14.73. HRMS (ESI-TOF) (*m/z*): Calcd for C<sub>16</sub>H<sub>14</sub>NaO<sub>2</sub>, ([M + Na]<sup>+</sup>), 261.0886; found 261.0882.

#### 2'-(methoxymethyl)-[1,1'-biphenyl]-2,6-dicarbaldehyde

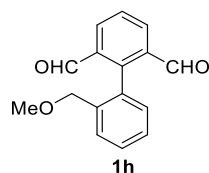

**1h**: white solid;  $^1\text{H NMR}$  (600 MHz, Chloroform-*d*)  $\delta$  9.64 (d,  $J = 1.0$  Hz, 2H), 8.26 (d,  $J = 7.7$  Hz, 2H), 7.68 (td,  $J = 7.8, 1.0$  Hz, 1H), 7.55 – 7.50 (m, 2H), 7.49 – 7.44 (m, 1H), 7.34 – 7.28 (m, 1H), 4.06 (s, 2H), 3.06 (s, 3H).  $^{13}\text{C NMR}$  (150 MHz, Chloroform-*d*)  $\delta$  190.55, 146.24, 136.95, 134.86, 132.96, 132.16, 130.82, 129.70, 129.36, 128.64, 128.15, 72.85, 58.05. **HRMS** (ESI-TOF) (m/z): Calcd for  $\text{C}_{16}\text{H}_{14}\text{NaO}_3$ , ( $[\text{M} + \text{Na}]^+$ ), 277.0835; found 277.0827.

**2'-(prop-1-en-2-yl)-[1,1'-biphenyl]-2,6-dicarbaldehyde**

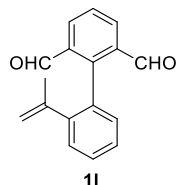

**1i**: white solid;  $^1\text{H NMR}$  (600 MHz, Chloroform-*d*)  $\delta$  9.76 (s, 2H), 8.24 (d,  $J = 7.7$  Hz, 2H), 7.65 (t,  $J = 7.7$  Hz, 1H), 7.50 (td,  $J = 7.6, 1.4$  Hz, 1H), 7.44 – 7.39 (m, 2H), 7.30 – 7.22 (m, 1H), 5.02 (t,  $J = 1.6$  Hz, 1H), 4.82 (s, 1H), 1.56 (t,  $J = 1.2$  Hz, 3H).  $^{13}\text{C NMR}$  (150 MHz, Chloroform-*d*)  $\delta$  190.84, 147.74, 144.63, 144.47, 134.62, 132.54, 131.45, 129.89, 129.54, 128.82, 128.47, 127.22, 118.41, 23.24. **HRMS** (ESI-TOF) (m/z): Calcd for  $\text{C}_{17}\text{H}_{14}\text{NaO}_2$ , ( $[\text{M} + \text{Na}]^+$ ), 273.0886; found 273.0887.

**3'-chloro-2'-methyl-[1,1'-biphenyl]-2,6-dicarbaldehyde**

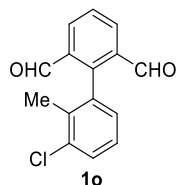

**1o**: white solid;  $^1\text{H NMR}$  (600 MHz, Chloroform-*d*)  $\delta$  9.71 (s, 2H), 8.28 (d,  $J = 7.7$  Hz, 2H), 7.70 (t,  $J = 7.7$  Hz, 1H), 7.54 (d,  $J = 8.0$  Hz, 1H), 7.28 (t,  $J = 7.8$  Hz, 1H), 7.16 (d,  $J = 7.6$  Hz, 1H), 2.11 (s, 3H).  $^{13}\text{C NMR}$  (150 MHz, Chloroform-*d*)  $\delta$  190.29, 146.75, 135.90, 134.51, 134.27, 132.98, 130.25, 129.14, 128.91, 126.81, 117.13, 17.99. **HRMS**(ESI-TOF) (m/z): Calcd for  $\text{C}_{15}\text{H}_{11}\text{ClNaO}_2$ , ( $[\text{M} + \text{Na}]^+$ ), 281.0340; found 281.0341.

**2'-ethyl-[1,1'-biphenyl]-2,6-dicarbaldehyde**

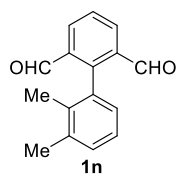

**1n**: white solid;  $^1\text{H NMR}$  (600 MHz, Chloroform-*d*)  $\delta$  9.70 (s, 2H), 8.26 (d,  $J = 7.7$  Hz, 2H), 7.66 (s, 1H), 7.30 (d,  $J = 7.6$  Hz, 1H), 7.22 (t,  $J = 7.6$  Hz, 1H), 7.08 (d,  $J = 7.6$  Hz, 1H), 2.37 (s, 3H), 1.97 (s, 3H).  $^{13}\text{C NMR}$  (150 MHz, Chloroform-*d*)  $\delta$  191.01, 148.69, 137.71, 135.48, 134.71, 132.52, 132.17, 130.75, 128.57, 128.29, 125.55, 20.40, 17.10. **HRMS** (ESI-TOF) (m/z): Calcd for  $\text{C}_{16}\text{H}_{14}\text{NaO}_2$ , ( $[\text{M} + \text{Na}]^+$ ), 261.0886; found 261.0882.

### 2',4'-dimethyl-[1,1'-biphenyl]-2,6-dicarbaldehyde

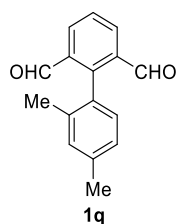

**1q:** white solid;  $^1\text{H NMR}$  (500 MHz, Chloroform-*d*)  $\delta$  9.79 (s, 2H), 8.32 (d,  $J = 7.7$  Hz, 2H), 7.72 (t,  $J = 7.7$  Hz, 1H), 7.26 (s, 1H), 7.23 – 7.20 (m, 2H), 2.49 (s, 3H), 2.10 (s, 3H).  $^{13}\text{C NMR}$  (150 MHz, Chloroform-*d*)  $\delta$  190.88, 148.05, 139.14, 136.59, 134.78, 132.55, 131.08, 130.63, 129.14, 128.31, 126.73, 21.18, 20.29. **HRMS** (ESI-TOF) ( $m/z$ ): Calcd for  $\text{C}_{16}\text{H}_{14}\text{NaO}_2$ , ( $[\text{M} + \text{Na}]^+$ ), 261.0886; found 261.0887.

### 5'-fluoro-2'-methyl-[1,1'-biphenyl]-2,6-dicarbaldehyde

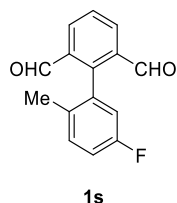

**1s:** light yellow solid;  $^1\text{H NMR}$  (600 MHz, Chloroform-*d*)  $\delta$  9.72 (d,  $J = 0.9$  Hz, 2H), 8.28 (d,  $J = 7.7$  Hz, 2H), 7.70 (td,  $J = 7.8, 0.9$  Hz, 1H), 7.33 (dd,  $J = 8.6, 5.6$  Hz, 1H), 7.14 (td,  $J = 8.4, 2.7$  Hz, 1H), 7.00 (dd,  $J = 8.6, 2.8$  Hz, 1H), 2.01 (s, 3H).  $^{13}\text{C NMR}$  (150 MHz, Chloroform-*d*)  $\delta$  190.30, 160.78 ( $J = 246.8$  Hz), 146.30, 134.35, 134.98 ( $J = 7.1$  Hz), 132.99, 132.65 ( $J = 4.3$  Hz), 131.89 ( $J = 7.9$  Hz), 128.95, 117.45 ( $J = 21.9$  Hz), 116.29 ( $J = 20.7$  Hz), 19.60.  $^{19}\text{F NMR}$  (565 MHz, Chloroform-*d*)  $\delta$  -116.43 – -116.47. (m, 1F). **HRMS** (ESI-TOF) ( $m/z$ ): Calcd for  $\text{C}_{15}\text{H}_{11}\text{FNaO}_2$ , ( $[\text{M} + \text{Na}]^+$ ), 265.0635; found 265.0635.

### 2',5'-dimethyl-[1,1'-biphenyl]-2,6-dicarbaldehyde

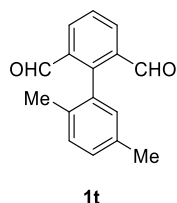

**1t:** light yellow solid;  $^1\text{H NMR}$  (600 MHz, Chloroform-*d*)  $\delta$  9.71 (s, 2H), 8.26 (d,  $J = 7.7$  Hz, 2H), 7.65 (t,  $J = 7.7$  Hz, 1H), 7.25 – 7.20 (m, 2H), 7.05 (s, 1H), 2.36 (s, 3H), 2.01 (s, 3H).  $^{13}\text{C NMR}$  (150 MHz, Chloroform-*d*)  $\delta$  191.07, 148.27, 135.65, 134.57, 133.69, 132.56, 131.95, 131.30, 130.21, 130.07, 128.35, 20.87, 19.88. **HRMS** (ESI-TOF) ( $m/z$ ): Calcd for  $\text{C}_{16}\text{H}_{14}\text{NaO}_2$ , ( $[\text{M} + \text{Na}]^+$ ), 261.0886; found 261.0894.



#### 2',4',5'-trimethyl-[1,1'-biphenyl]-2,6-dicarbaldehyde

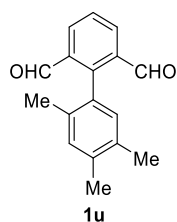

**1u:** white solid;  $^1\text{H NMR}$  (600 MHz, Chloroform-*d*)  $\delta$  9.72 (d,  $J = 0.9$  Hz, 2H), 8.24 (d,  $J = 7.7$  Hz, 2H), 7.63 (t,  $J = 7.8$  Hz, 1H), 7.11 (s, 1H), 6.98 (s, 1H), 2.32 (s, 3H), 2.26 (s, 3H), 1.98 (s, 3H).  $^{13}\text{C NMR}$  (150 MHz, Chloroform-*d*)  $\delta$  191.29, 148.39, 137.78, 134.74, 134.24, 133.97, 132.48, 131.89, 131.56, 129.26, 128.19, 19.75, 19.49, 19.21. **HRMS** (ESI-TOF) ( $m/z$ ): Calcd for  $\text{C}_{17}\text{H}_{16}\text{NaO}_2$ , ( $[\text{M} + \text{Na}]^+$ ), 275.1043; found 275.1038.

#### 4'-ethoxy-2',5'-dimethyl-[1,1'-biphenyl]-2,6-dicarbaldehyde

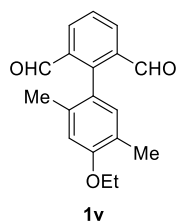

**1v:** light green solid;  $^1\text{H NMR}$  (600 MHz, Chloroform-*d*)  $\delta$  9.74 (d,  $J = 0.9$  Hz, 2H), 8.23 (d,  $J = 7.7$  Hz, 2H), 7.63 (dd,  $J = 8.2, 7.2$  Hz, 1H), 6.98 (s, 1H), 6.76 (s, 1H), 4.10 (d,  $J = 7.0$  Hz, 2H), 2.22 (s, 3H), 2.00 (s, 3H), 1.48 (t,  $J = 7.0$  Hz, 3H).  $^{13}\text{C NMR}$  (150 MHz, Chloroform-*d*)  $\delta$  191.45, 157.72, 148.40, 135.32, 135.05, 132.80, 132.47, 128.12, 124.59, 123.11, 112.50, 63.69, 20.45, 15.75, 14.92. **HRMS** (ESI-TOF) ( $m/z$ ): Calcd for  $\text{C}_{18}\text{H}_{18}\text{NaO}_3$ , ( $[\text{M} + \text{Na}]^+$ ), 305.1148; found 305.1168.

#### 4-fluoro-[1,1':2',1''-terphenyl]-2,6-dicarbaldehyde

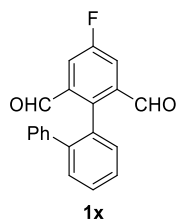

**1x:** white solid;  $^1\text{H NMR}$  (500 MHz, Chloroform-*d*)  $\delta$  9.78 (d,  $J = 3.0$  Hz, 2H), 7.76 (d,  $J = 8.0$  Hz, 2H), 7.63 (td,  $J = 7.6, 1.4$  Hz, 1H), 7.56 – 7.51 (m, 2H), 7.39 (dd,  $J = 7.6, 1.3$  Hz, 1H), 7.19 – 7.17 (m, 3H), 6.95 (dd,  $J = 6.7, 2.9$  Hz, 2H).  $^{13}\text{C NMR}$  (150 MHz, Chloroform-*d*)  $\delta$  189.23, 162.17 ( $J = 250.4$  Hz), 143.36 ( $J = 3.5$  Hz), 143.08, 139.39, 136.86 ( $J = 5.7$  Hz), 132.04, 130.47, 130.24, 129.98, 129.33, 128.52, 127.55 ( $J = 13.8$  Hz), 119.06, 118.91.  $^{19}\text{F NMR}$  (565 MHz, Chloroform-*d*)  $\delta$  -110.76. (s, 1F). **HRMS** (ESI-TOF) ( $m/z$ ): Calcd for  $\text{C}_{20}\text{H}_{13}\text{FNaO}_2$ , ( $[\text{M} + \text{Na}]^+$ ), 327.0792; found 327.0788.

#### 4-chloro-[1,1':2',1''-terphenyl]-2,6-dicarbaldehyde

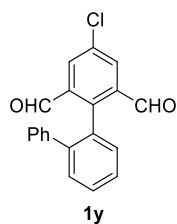

**1y**: white solid;  $^1\text{H NMR}$  (500 MHz, Chloroform-*d*)  $\delta$  9.77 (s, 2H), 8.03 (s, 2H), 7.63 (td,  $J = 7.6, 1.4$  Hz, 1H), 7.56 – 7.52 (m, 2H), 7.38 – 7.36 (m, 1H), 7.19 – 7.18 (m, 3H), 6.97 – 6.95 (m, 2H).  $^{13}\text{C NMR}$  (150 MHz, Chloroform-*d*)  $\delta$  189.18, 145.44, 142.90, 139.30, 136.05, 135.32, 132.13, 131.85, 130.51, 130.09, 130.06, 129.33, 128.58, 127.62, 127.57. **HRMS** (ESI-TOF) ( $m/z$ ): Calcd for  $\text{C}_{20}\text{H}_{13}\text{ClNaO}_2$ , ( $[\text{M} + \text{Na}]^+$ ), 343.0496; found 343.0498.

#### 2'-(diphenylphosphanyl)-[1,1'-biphenyl]-2,6-dicarbaldehyde

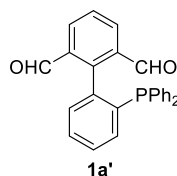

**1a'**: white solid;  $^1\text{H NMR}$  (600 MHz, Chloroform-*d*)  $\delta$  9.50 (s, 2H), 8.08 (d,  $J = 7.8$  Hz, 2H), 7.57 (t,  $J = 7.6$  Hz, 1H), 7.47 – 7.42 (m, 2H), 7.33 – 7.26 (m, 7H), 7.18 – 7.13 (m, 5H).  $^{13}\text{C NMR}$  (150 MHz, Chloroform-*d*)  $\delta$  190.07, 146.66 (d,  $J = 6.7$  Hz), 139.38 (d,  $J = 14.0$  Hz), 137.68 (d,  $J = 28.2$  Hz), 134.37, 134.33 (d,  $J = 20.1$  Hz), 134.14 (d,  $J = 10.3$  Hz), 132.83, 132.12, 131.46 (d,  $J = 4.6$  Hz), 129.41, 129.30, 128.72, 128.67, 128.62.  $^{31}\text{P NMR}$  (243 MHz, Chloroform-*d*)  $\delta$  -11.63. **HRMS** (ESI-TOF) ( $m/z$ ): Calcd for  $\text{C}_{26}\text{H}_{19}\text{NaO}_2\text{P}$ , ( $[\text{M} + \text{Na}]^+$ ), 417.1015; found 417.1005.

## 2.2 General Synthetic Procedure of 3.

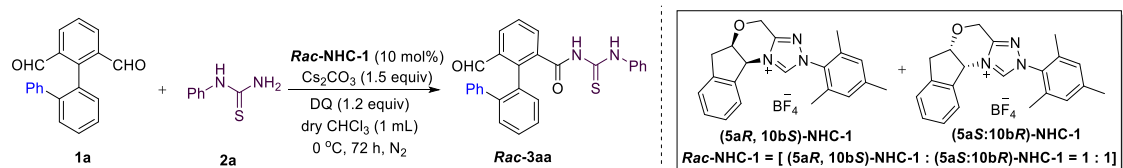

### Racemic Synthesis:

Preparation of *Rac*-NHC-1: (5a*R*, 10b*S*)-NHC-1 (100 mg) and (5a*S*, 10b*R*)-NHC-1 (100 mg) are completely dissolved in dry DCM and concentrated to remove DCM.

**Representative Synthesis of Product (*Rac*)-3aa.** In a nitrogen-filled glovebox, a flame-dried screw-cap reaction tube equipped with a Teflon-coated magnetic stir bar was charged with *Rac*-NHC-1 (10 mol%, 4.18 mg), Cs<sub>2</sub>CO<sub>3</sub> (49.0 mg, 1.5 equiv), [1,1':2',1''-terphenyl]-2,6-dicarbaldehyde **1a** (0.1 mmol, 29 mg) and anhydrous chloroform (1.0 mL). The mixture was stirred for 5 minutes, followed by the addition of N-Phenylthiourea **2a** (46.0 mg, 3.0 equiv) and 3,3',5,5'-tetra-*tert*-butyldiphenoquinone (48 mg, 1.2 equiv). Then the tube was sealed with a Thermo Scientific PTFE screw cap equipped with a septum, removed from the glovebox. The reaction mixture was stirred at 0 °C for 72 h. After the reaction was completed as indicated by TLC analysis, the solvent was removed under reduced pressure and the residue was purified by silica gel chromatography using petroleum ether/ethyl acetate 10:3 (v/v) to give the racemic product *Rac*-3aa.

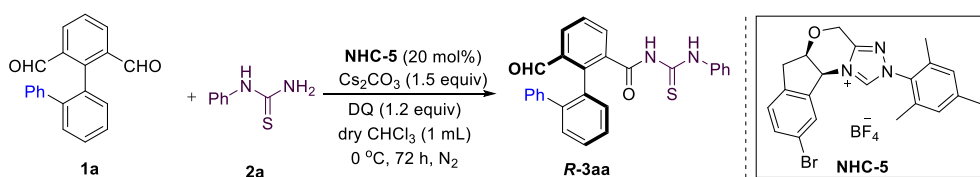

### Asymmetric Synthesis:

**Representative Synthesis of Product *R*-3aa** (standard conditions A): In a nitrogen-filled glovebox, a flame-dried screw-cap reaction tube equipped with a Teflon-coated magnetic stir bar was charged with (5a*R*, 10b*S*)-NHC-5 (20 mol%, 10.0 mg), Cs<sub>2</sub>CO<sub>3</sub> (49.0 mg, 1.5 equiv), [1,1':2',1''-terphenyl]-2,6-dicarbaldehyde **1a** (0.1 mmol, 29 mg) and anhydrous chloroform (1.0 mL). The mixture was stirred for 5 minutes, followed by the addition of N-Phenylthiourea **2a** (46.0 mg, 3.0 equiv) and 3,3',5,5'-tetra-*tert*-butyldiphenoquinone (48 mg, 1.2 equiv). Then the tube was sealed with a Thermo Scientific PTFE screw cap equipped with a septum, removed from the glovebox. The reaction mixture was stirred at 0 °C for 72 h. After the reaction was completed as indicated by TLC analysis, the solvent was removed under reduced pressure and the residue was purified by silica gel chromatography using petroleum ether/ethyl acetate 10:3 (v/v) to give the product *R*-3aa.

**(R)-6-formyl-N-(phenylcarbamothioyl)-[1,1':2',1''-terphenyl]-2-carboxamide (3aa)**

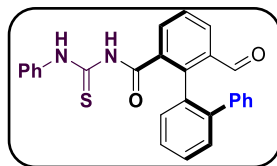

The title compound **3aa** was prepared under the optimized conditions A and purified by preparative TLC (hexane: ethyl acetate = 10: 3). **3aa** was obtained as a light yellow solid (33.6 mg, 77%). <sup>1</sup>H NMR (500 MHz, Chloroform-*d*) δ 12.05 (s, 1H), 9.86 (s, 1H), 8.31 (s, 1H), 8.13 (d, *J* = 7.8 Hz, 1H), 7.82 (d, *J* = 7.6 Hz, 1H), 7.63 – 7.53 (m, 6H), 7.41 – 7.38 (m, 3H), 7.28 – 7.18 (m, 4H), 7.08 – 7.06 (m, 2H). <sup>13</sup>C NMR (150 MHz, Chloroform-*d*) δ 190.98, 177.82, 167.31, 143.91, 142.04, 139.52, 137.63, 135.55, 134.31, 133.33, 132.33, 131.45, 131.40, 131.13, 130.36, 129.57, 129.05, 128.60, 128.49, 128.27, 127.80, 127.06, 124.14.

HRMS (ESI-TOF) (*m/z*): Calcd for C<sub>27</sub>H<sub>21</sub>N<sub>2</sub>O<sub>2</sub>S, ([M + H]<sup>+</sup>), 437.1318; found 437.1314.

[α]<sub>D</sub><sup>20</sup> = -77.3 (*c* = 1.7, CH<sub>2</sub>Cl<sub>2</sub>).

HPLC analysis: Daicel Chiralpak OD-3 column (95:5 hexane: 2-propanol, 1.0 mL/min, 25 °C, 254 nm);

*t*<sub>R</sub> (major) = 14.42 min, *t*<sub>R</sub> (minor) = 23.35 min, 99% ee.

mV

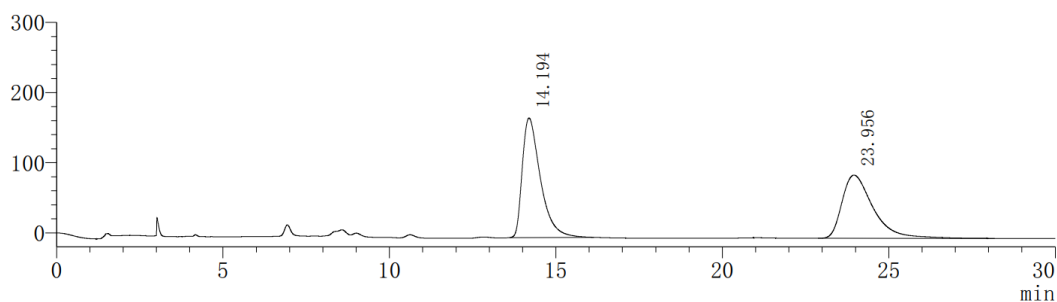

| Peak | Pet Time | Type | Width(min) | Area    | Hight  | Area%   |
|------|----------|------|------------|---------|--------|---------|
| 1    | 14.194   | M    | 0.9798     | 6451325 | 170382 | 52.3775 |
| 2    | 23.956   | M    | 1.6375     | 5865661 | 90150  | 47.6225 |

mV

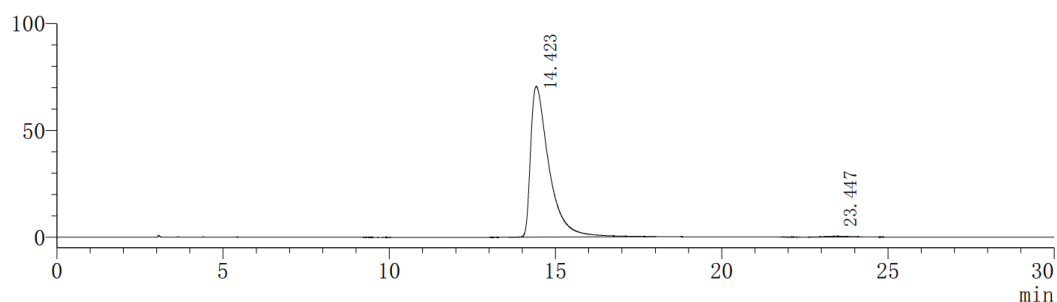

| Peak | Pet Time | Type | Width(min) | Area    | Hight | Area%   |
|------|----------|------|------------|---------|-------|---------|
| 1    | 14.423   | M    | 0.9629     | 2721001 | 70651 | 99.2210 |
| 2    | 23.447   | M    | 1.4515     | 21363   | 401   | 0.7790  |

**(R)-6-formyl-4''-methyl-N-(phenylcarbamothioyl)-[1,1':2',1''-terphenyl]-2-carboxamide (3ba)**

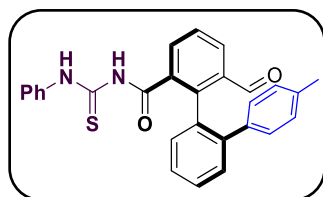

The title compound **3ba** was prepared under the optimized conditions A and purified by preparative TLC (hexane: ethyl acetate = 10: 3). **3ba** was obtained as a light yellow oil (38.3 mg, 85%). **<sup>1</sup>H NMR (500 MHz, Chloroform-*d*)**  $\delta$  12.02 (s, 1H), 9.87 (s, 1H), 8.17 (s, 1H), 8.14 (dd,  $J = 7.9, 1.5$  Hz, 1H), 7.79 (dd,  $J = 7.7, 1.5$  Hz, 1H), 7.63 – 7.51 (m, 6H), 7.41 – 7.35 (m, 3H), 7.28 – 7.25 (m, 1H), 7.00 (d,  $J = 7.9$  Hz, 2H), 6.94 (d,  $J = 8.1$  Hz, 2H), 2.28 (s, 3H). **<sup>13</sup>C NMR (150 MHz, Chloroform-*d*)**  $\delta$  191.12, 177.96, 167.32, 144.21, 141.88, 137.67, 137.65, 136.52, 135.64, 134.41, 133.06, 132.23, 131.57, 131.41, 131.07, 130.27, 129.46, 129.41, 129.03, 128.36, 127.95, 127.02, 124.17, 21.33.

**HRMS (ESI-TOF) (m/z):** Calcd for C<sub>28</sub>H<sub>23</sub>N<sub>2</sub>O<sub>2</sub>S, ([M + H]<sup>+</sup>), 451.1475; found 451.1469.

**$[\alpha]_D^{20} = -78.1$  (c = 1.9, CH<sub>2</sub>Cl<sub>2</sub>).**

**HPLC analysis:** Daicel Chiralpak OD-H column (95:5 hexane: 2-propanol, 1.0 mL/min, 25 °C, 254 nm);  $t_R$  (major) = 13.77 min,  $t_R$  (minor) = 20.25 min, 99% ee.

mV

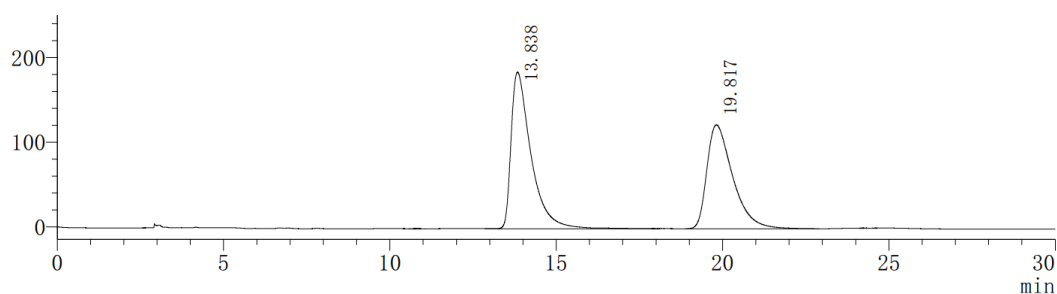

| Peak | Pet Time | Type | Width(min) | Area    | Hight  | Area%   |
|------|----------|------|------------|---------|--------|---------|
| 1    | 13.838   | SV   | 1.0411     | 7703834 | 185027 | 53.7366 |
| 2    | 19.817   | M    | 1.3948     | 6632449 | 122769 | 46.2634 |

mV

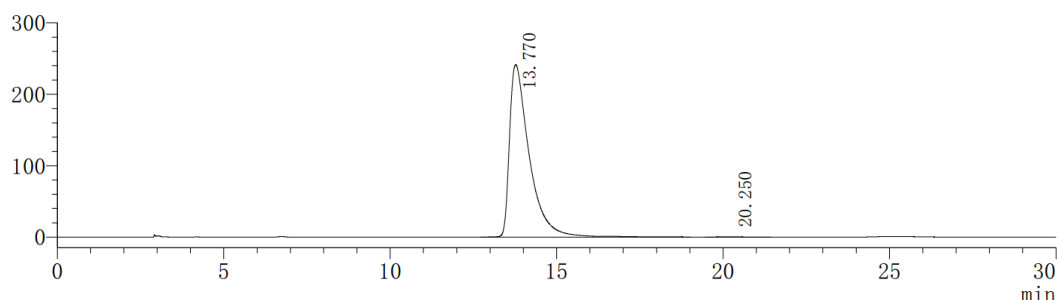

| Peak | Pet Time | Type | Width(min) | Area     | Hight  | Area%   |
|------|----------|------|------------|----------|--------|---------|
| 1    | 13.770   | SV   | 1.0255     | 10000283 | 241582 | 99.9027 |
| 2    | 20.250   | M    | 1.1103     | 9740     | 211    | 0.0973  |

**(R)-6-formyl-2'-methyl-N-(phenylcarbamothioyl)-[1,1'-biphenyl]-2-carboxamide (3ca)**

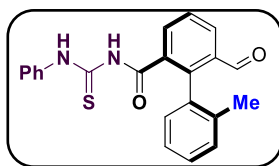

The title compound **3ca** was prepared under the optimized conditions A and purified by preparative TLC (hexane: ethyl acetate = 10: 3). **3ca** was obtained as a yellow oil (20.9 mg, 56%). <sup>1</sup>H NMR (600 MHz, Chloroform-*d*) δ 12.14 (s, 1H), 9.63 (s, 1H), 8.57 (s, 1H), 8.23 (dd, *J* = 7.8, 1.4 Hz, 1H), 8.14 (dd, *J* = 7.7, 1.4 Hz, 1H), 7.68 (t, *J* = 7.8 Hz, 1H), 7.61 – 7.59 (m, 2H), 7.45 (td, *J* = 7.5, 1.4 Hz, 1H), 7.42 (d, *J* = 7.3 Hz, 1H), 7.39 (td, *J* = 7.3, 1.4 Hz, 1H), 7.35 (t, *J* = 7.9 Hz, 2H), 7.27 – 7.25 (m, 1H), 7.23 (t, *J* = 7.4 Hz, 1H), 2.14 (s, 3H). <sup>13</sup>C NMR (150 MHz, Chloroform-*d*) δ 191.01, 177.59, 167.19, 143.30, 137.56, 136.64, 134.94, 134.39, 133.90, 133.28, 131.39, 131.29, 130.19, 129.75, 128.96, 128.85, 127.13, 126.98, 124.03, 20.37.

HRMS (ESI-TOF) (*m/z*): Calcd for C<sub>22</sub>H<sub>19</sub>N<sub>2</sub>O<sub>2</sub>S, ([M + H]<sup>+</sup>), 375.1162; found 375.1151.

[α]<sub>D</sub><sup>20</sup> = -37.2 (*c* = 1.0, CH<sub>2</sub>Cl<sub>2</sub>).

HPLC analysis: Daicel Chiralpak IC-3 column (95:5 hexane: 2-propanol, 1.0 mL/min, 25 °C, 254 nm);

*t*<sub>R</sub> (major) = 19.18 min, *t*<sub>R</sub> (minor) = 20.79 min, 95% ee.

mV

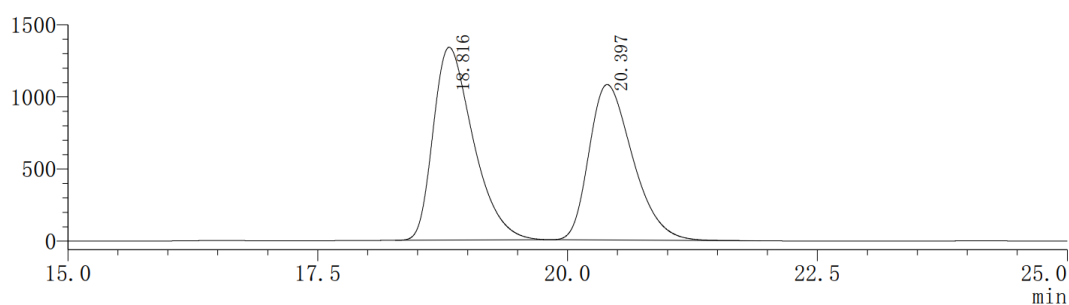

| Peak | Pet Time | Type | Width(min) | Area     | Hight   | Area%   |
|------|----------|------|------------|----------|---------|---------|
| 1    | 18.816   | M    | 0.7265     | 37264452 | 1337010 | 53.2226 |
| 2    | 20.397   | M    | 0.7983     | 32751813 | 1077898 | 46.7774 |

mV

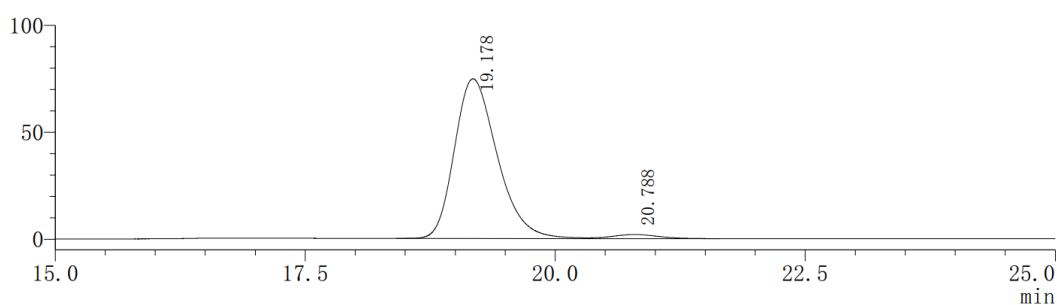

| Peak | Pet Time | Type | Width(min) | Area    | Hight | Area%   |
|------|----------|------|------------|---------|-------|---------|
| 1    | 19.178   | M    | 0.7736     | 2225705 | 74734 | 97.2718 |
| 2    | 20.788   | M    | 0.8701     | 62426   | 1936  | 2.7282  |

**(R)-2'-ethyl-6-formyl-N-(phenylcarbamothioyl)-[1,1'-biphenyl]-2-carboxamide (3da)**

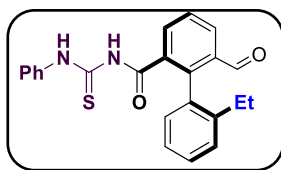

The title compound **3da** was prepared under the optimized conditions A and purified by preparative TLC (hexane: ethyl acetate = 10: 3). **3da** was obtained as a yellow oil (27.6 mg, 71%). **<sup>1</sup>H NMR (500 MHz, Chloroform-*d*)**  $\delta$  12.17 (s, 1H), 9.64 (d,  $J = 0.9$  Hz, 1H), 8.50 (s, 1H), 8.24 (dd,  $J = 7.7, 1.5$  Hz, 1H), 8.17 (dd,  $J = 7.8, 1.5$  Hz, 1H), 7.70 (td,  $J = 7.8, 0.9$  Hz, 1H), 7.61 – 7.59 (m, 2H), 7.54 – 7.48 (m, 2H), 7.41 (td,  $J = 7.3, 1.8$  Hz, 1H), 7.38 – 7.34 (m, 2H), 7.26 – 7.22 (m, 2H), 2.51 – 2.36 (m, 2H), 1.11 (t,  $J = 7.6$  Hz, 3H). **<sup>13</sup>C NMR (150 MHz, Chloroform-*d*)**  $\delta$  191.08, 177.52, 167.07, 143.09, 142.50, 137.58, 135.12, 134.63, 133.79, 132.56, 131.32, 130.53, 129.84, 129.79, 128.98, 128.89, 127.18, 126.97, 124.04, 26.51, 14.60.

**HRMS (ESI-TOF) (m/z):** Calcd for C<sub>23</sub>H<sub>21</sub>N<sub>2</sub>O<sub>2</sub>S, ([M + H]<sup>+</sup>), 389.1318; found 389.1318.

**$[\alpha]_D^{20} = -27.6$**  ( $c = 1.4$ , CH<sub>2</sub>Cl<sub>2</sub>).

**HPLC analysis:** Daicel Chiralpak AD-3 column (95:5 hexane: 2-propanol, 1.0 mL/min, 25 °C, 254 nm);

$t_R$  (minor) = 16.83 min,  $t_R$  (major) = 19.46 min, 99% ee.

mV

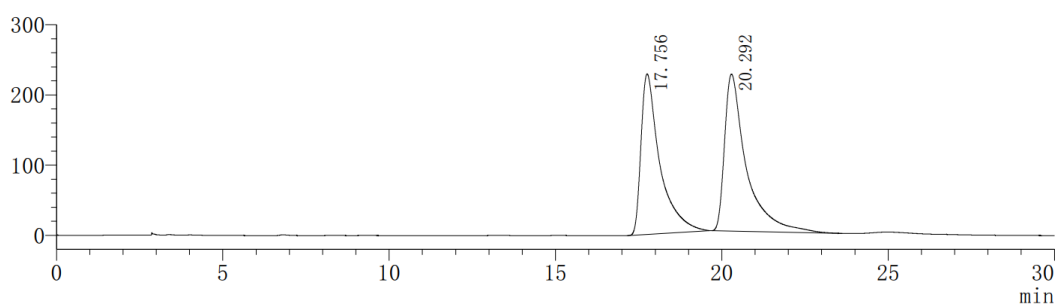

| Peak | Pet Time | Type | Width(min) | Area     | Hight  | Area%   |
|------|----------|------|------------|----------|--------|---------|
| 1    | 17.756   | M    | 0.9061     | 8994700  | 228629 | 46.9218 |
| 2    | 20.292   | M    | 1.0193     | 10174857 | 223670 | 53.0782 |

mV

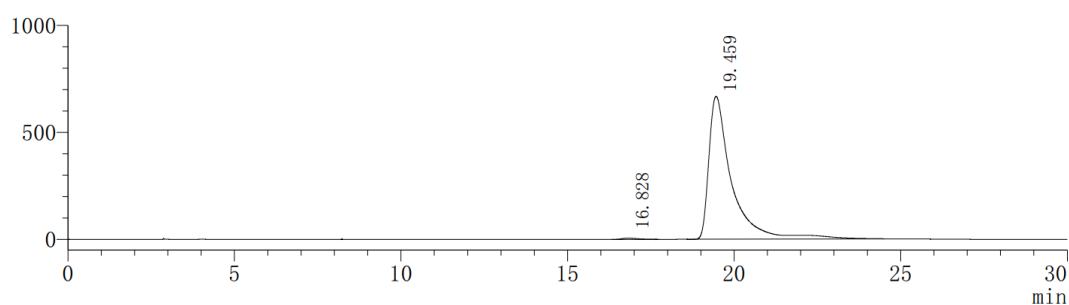

| Peak | Pet Time | Type | Width(min) | Area     | Hight  | Area%   |
|------|----------|------|------------|----------|--------|---------|
| 1    | 16.828   | M    | 0.8227     | 205703   | 6335   | 0.6388  |
| 2    | 19.459   | M    | 1.0358     | 31995610 | 668226 | 99.3612 |

**(R)-6-formyl-2'-isopropyl-N-(phenylcarbamothioyl)-[1,1'-biphenyl]-2-carboxamide (3ea)**

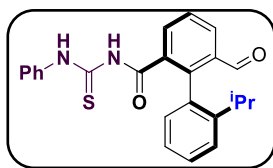

The title compound **3ea** was prepared under the optimized conditions A and purified by preparative TLC (hexane: ethyl acetate = 10: 3). **3ea** was obtained as a light yellow oil (24.1 mg, 60%). **<sup>1</sup>H NMR (600 MHz, Chloroform-*d*)**  $\delta$  12.18 (s, 1H), 9.65 (s, 1H), 8.57 (s, 1H), 8.24 (dd,  $J = 7.9, 1.4$  Hz, 1H), 8.17 (dd,  $J = 7.7, 1.4$  Hz, 1H), 7.69 (t,  $J = 7.8$  Hz, 1H), 7.59 – 7.58 (m, 2H), 7.55 (d,  $J = 4.3$  Hz, 2H), 7.42 – 7.38 (m, 1H), 7.36 (t,  $J = 7.8$  Hz, 2H), 7.25 – 7.22 (m, 2H), 2.65 – 2.58 (m, 1H), 1.23 (d,  $J = 6.9$  Hz, 3H), 1.04 (d,  $J = 6.8$  Hz, 3H). **<sup>13</sup>C NMR (150 MHz, Chloroform-*d*)**  $\delta$  191.00, 177.62, 167.07, 147.62, 143.26, 137.60, 135.37, 134.53, 133.83, 131.79, 131.36, 130.79, 129.75, 128.98, 128.81, 127.29, 127.02, 126.99, 124.13, 30.73, 24.39, 23.51.

**HRMS (ESI-TOF) (m/z):** Calcd for C<sub>24</sub>H<sub>23</sub>N<sub>2</sub>O<sub>2</sub>S, ([M + H]<sup>+</sup>), 403.1475; found 403.1467.

**$[\alpha]_D^{20}$**  = -68.8 (c = 1.2, CH<sub>2</sub>Cl<sub>2</sub>).

**HPLC analysis:** Daicel Chiralpak AD-3 column (95:5 hexane: 2-propanol, 1.0 mL/min, 25 °C, 254 nm);

$t_R$  (minor) = 13.52 min,  $t_R$  (major) = 19.36 min, 97% ee.

mV

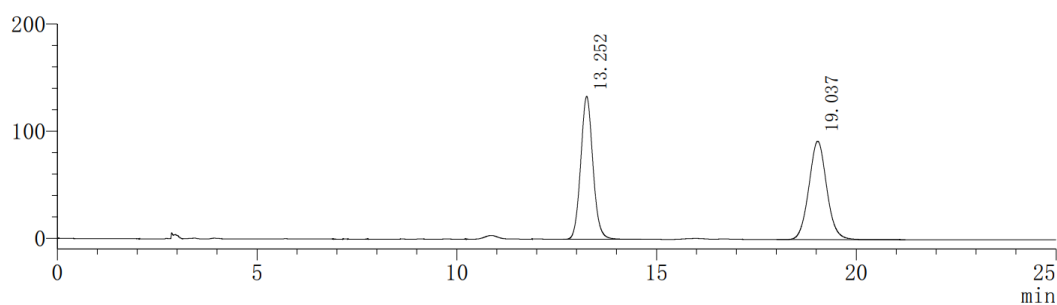

| Peak | Pet Time | Type | Width(min) | Area    | Hight  | Area%   |
|------|----------|------|------------|---------|--------|---------|
| 1    | 13.252   | M    | 0.5533     | 2835695 | 133311 | 49.7426 |
| 2    | 19.037   | M    | 0.8109     | 2865041 | 91939  | 50.2574 |

mV

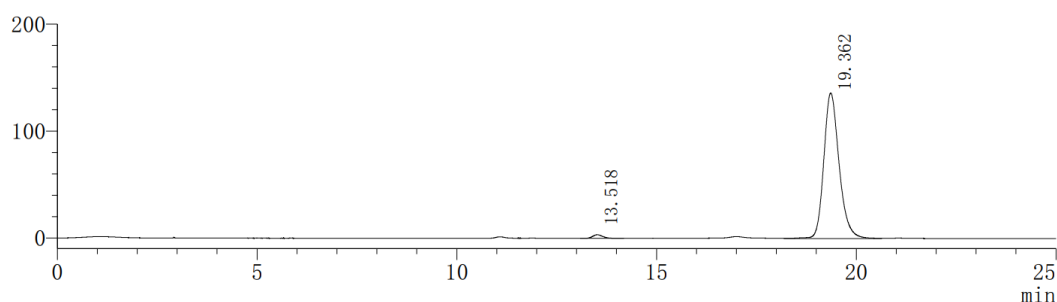

| Peak | Pet Time | Type | Width(min) | Area    | Hight  | Area%   |
|------|----------|------|------------|---------|--------|---------|
| 1    | 13.518   | M    | 0.4544     | 61974   | 3432   | 1.6819  |
| 2    | 19.362   | M    | 0.6810     | 3622790 | 136127 | 98.3181 |



**(R)-2'-bromo-6-formyl-N-(phenylcarbamothioyl)-[1,1'-biphenyl]-2-carboxamide (3fa)**

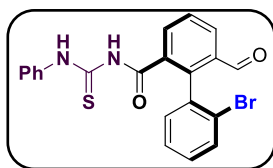

The title compound **3fa** was prepared under the optimized conditions A and purified by preparative TLC (hexane: ethyl acetate = 10: 3). **3fa** was obtained as a yellow oil (20.6 mg, 47%). **<sup>1</sup>H NMR (600 MHz, Chloroform-*d*)**  $\delta$  12.03 (s, 1H), 9.68 (d,  $J = 0.8$  Hz, 1H), 8.63 (s, 1H), 8.24 (dd,  $J = 7.8, 1.4$  Hz, 1H), 8.04 (dd,  $J = 7.7, 1.4$  Hz, 1H), 7.80 (dd,  $J = 8.1, 1.1$  Hz, 1H), 7.73 (td,  $J = 7.7, 0.8$  Hz, 1H), 7.61 – 7.60 (m, 2H), 7.51 (td,  $J = 7.5, 1.2$  Hz, 1H), 7.41 (td,  $J = 7.8, 1.7$  Hz, 1H), 7.38 – 7.35 (m, 3H), 7.26 – 7.23 (m, 1H). **<sup>13</sup>C NMR (150 MHz, Chloroform-*d*)**  $\delta$  190.30, 177.58, 167.18, 142.34, 137.53, 135.23, 134.82, 134.47, 133.65, 133.54, 131.44, 131.39, 131.32, 129.50, 129.02, 128.36, 127.08, 124.08, 123.94. **HRMS (ESI-TOF) (m/z):** Calcd for C<sub>21</sub>H<sub>16</sub>BrN<sub>2</sub>O<sub>2</sub>S, ([M + H]<sup>+</sup>), 439.0110; found 439.0108.

**$[\alpha]_D^{20}$**  = -7.0 (c = 1.0, CH<sub>2</sub>Cl<sub>2</sub>).

**HPLC analysis:** Daicel Chiralpak IC-3 column (95:5 hexane: 2-propanol, 1.0 mL/min, 25 °C, 254 nm);  $t_R$  (minor) = 22.30 min,  $t_R$  (major) = 25.11 min, 99% ee.

mV

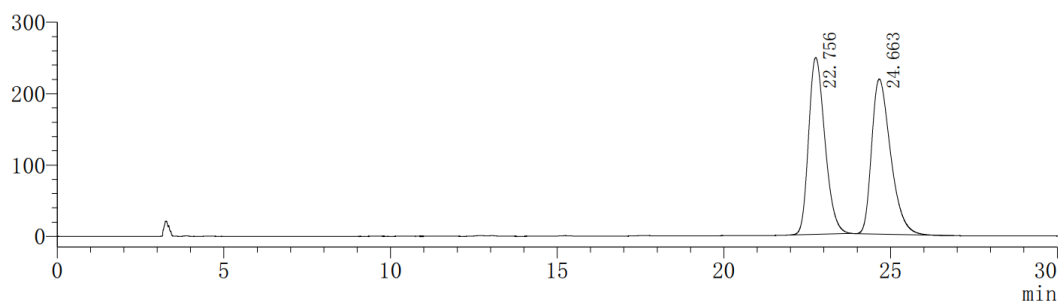

| Peak | Pet Time | Type | Width(min) | Area    | Hight  | Area%   |
|------|----------|------|------------|---------|--------|---------|
| 1    | 22.756   | M    | 0.8898     | 8416453 | 247943 | 49.4297 |
| 2    | 24.663   | M    | 1.0335     | 8610652 | 217373 | 50.5703 |

mV

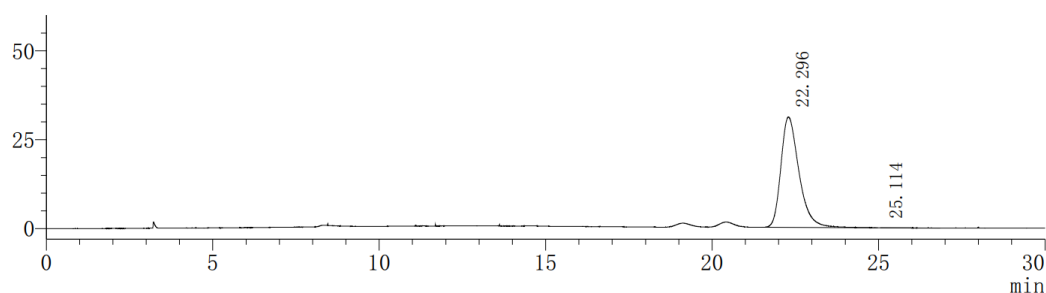

| Peak | Pet Time | Type | Width(min) | Area    | Hight | Area%   |
|------|----------|------|------------|---------|-------|---------|
| 1    | 22.296   | M    | 0.9660     | 1173257 | 31043 | 99.9816 |
| 2    | 25.114   | M    | 0.0256     | 216     | 14    | 0.0184  |

**(R)-6-formyl-2'-(methoxymethyl)-N-(phenylcarbamothioyl)-[1,1'-biphenyl]-2-carboxamide (3ha)**

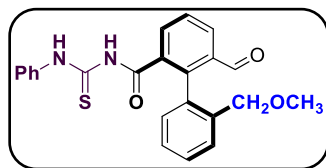

The title compound **3ha** was prepared under the optimized conditions A and purified by preparative TLC (hexane: ethyl acetate = 10: 3). **3ha** was obtained as a yellow oil (29.9 mg, 74%). **<sup>1</sup>H NMR (500 MHz, Chloroform-*d*)**  $\delta$  12.21 (s, 1H), 10.17 (s, 1H), 9.65 (s, 1H), 8.18 (dd,  $J = 7.8, 1.3$  Hz, 1H), 7.97 (dd,  $J = 7.5, 1.3$  Hz, 1H), 7.68 (t,  $J = 7.7$  Hz, 1H), 7.60 (d,  $J = 7.9$  Hz, 2H), 7.52 – 7.46 (m, 3H), 7.34 (t,  $J = 7.8$  Hz, 2H), 7.26 (t,  $J = 4.3$  Hz, 1H), 7.21 (t,  $J = 7.5$  Hz, 1H), 4.37 (d,  $J = 10.4$  Hz, 1H), 4.28 (d,  $J = 10.4$  Hz, 1H), 3.10 (s, 3H). **<sup>13</sup>C NMR (150 MHz, Chloroform-*d*)**  $\delta$  191.01, 178.10, 168.78, 141.47, 137.79, 136.19, 135.74, 134.48, 134.08, 133.41, 130.54, 130.08, 130.04, 129.81, 129.62, 128.89, 128.83, 126.70, 124.06, 74.04, 58.89.

**HRMS (ESI-TOF) (m/z):** Calcd for C<sub>23</sub>H<sub>21</sub>N<sub>2</sub>O<sub>3</sub>S, ([M + H]<sup>+</sup>), 405.1267; found 405.1272.

**$[\alpha]_D^{20}$**  = 107.6 (c = 1.5, CH<sub>2</sub>Cl<sub>2</sub>).

**HPLC analysis:** Daicel Chiralpak AD-3 column (95:5 hexane: 2-propanol, 1.0 mL/min, 25 °C, 254 nm);

$t_R$  (major) = 30.19 min,  $t_R$  (minor) = 34.55 min, 97% ee.

mV

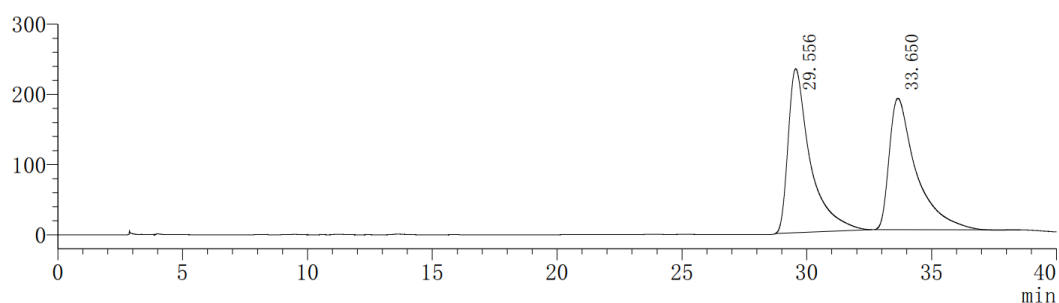

| Peak | Pet Time | Type | Width(min) | Area     | Hight  | Area%   |
|------|----------|------|------------|----------|--------|---------|
| 1    | 29.556   | M    | 1.4748     | 14386839 | 233539 | 50.7037 |
| 2    | 33.650   | M    | 1.8154     | 13987507 | 187129 | 49.2963 |

mV

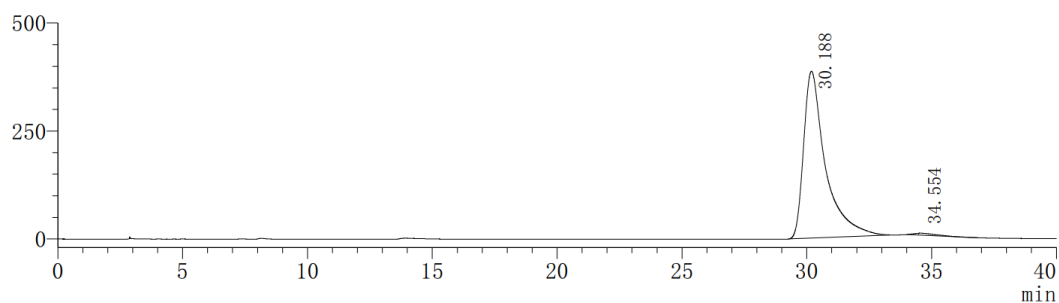

| Peak | Pet Time | Type | Width(min) | Area     | Hight  | Area%   |
|------|----------|------|------------|----------|--------|---------|
| 1    | 30.188   | M    | 1.3999     | 23420960 | 386337 | 98.7445 |
| 2    | 34.554   | M    | 1.8948     | 297790   | 4743   | 1.2555  |

**methyl (*R*)-2'-formyl-6'-((phenylcarbamothioyl)carbamoyl)-[1,1'-biphenyl]-2-carboxylate (**3ia**)**

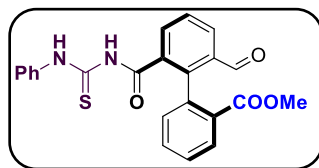

The title compound **3ia** was prepared under the optimized conditions A and purified by preparative TLC (hexane: ethyl acetate = 2:1). **3ia** was obtained as a yellow oil (25.5 mg, 61%). <sup>1</sup>H NMR (500 MHz, Chloroform-*d*) δ 12.00 (s, 1H), 9.62 (s, 1H), 9.56 (d, *J* = 0.8 Hz, 1H), 8.15 (dd, *J* = 7.8, 1.4 Hz, 1H), 8.11 (dd, *J* = 7.7, 1.4 Hz, 1H), 7.94 (dd, *J* = 7.7, 1.4 Hz, 1H), 7.69 – 7.63 (m, 2H), 7.59 (td, *J* = 7.7, 1.5 Hz, 3H), 7.34 (t, *J* = 7.9 Hz, 2H), 7.27 (dd, *J* = 7.5, 1.4 Hz, 1H), 7.21 (t, *J* = 7.4 Hz, 1H), 3.83 (s, 3H). <sup>13</sup>C NMR (150 MHz, Chloroform-*d*) δ 190.21, 177.57, 168.60, 168.29, 142.65, 137.62, 135.66, 135.21, 134.13, 133.15, 132.88, 131.13, 131.04, 130.89, 129.95, 129.76, 128.96, 128.73, 126.86, 123.93, 53.30. HRMS (ESI-TOF) (*m/z*): Calcd for C<sub>23</sub>H<sub>19</sub>N<sub>2</sub>O<sub>4</sub>S, ([M + H]<sup>+</sup>), 419.1060; found 419.1051.

[α]<sub>D</sub><sup>20</sup> = -29.6 (*c* = 1.3, CH<sub>2</sub>Cl<sub>2</sub>).

**HPLC analysis:** Daicel Chiralpak OD-3 column (95:5 hexane: 2-propanol, 1.0 mL/min, 25 °C, 254 nm); t<sub>R</sub> (minor) = 20.32 min, t<sub>R</sub> (major) = 26.58 min, 93% ee.

mV

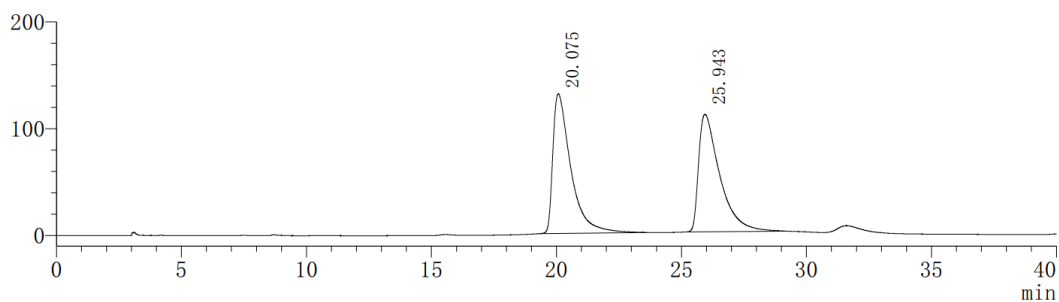

| Peak | Pet Time | Type | Width(min) | Area    | Hight  | Area%   |
|------|----------|------|------------|---------|--------|---------|
| 1    | 20.075   | M    | 1.2343     | 6532051 | 130809 | 50.2963 |
| 2    | 25.943   | M    | 1.4966     | 6455087 | 109983 | 49.7037 |

mV

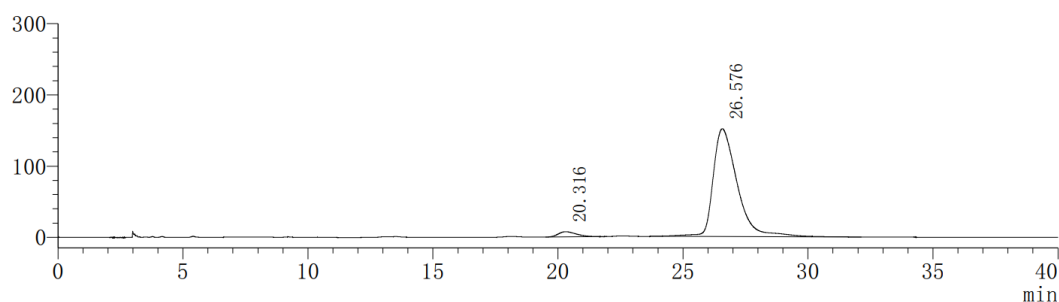

| Peak | Pet Time | Type | Width(min) | Area     | Hight  | Area%   |
|------|----------|------|------------|----------|--------|---------|
| 1    | 20.316   | M    | 1.3084     | 373144   | 7320   | 3.5409  |
| 2    | 26.576   | M    | 1.6881     | 10165059 | 151439 | 96.4591 |

**(R)-6-formyl-N-(phenylcarbamothioyl)-2'-(trifluoromethyl)-[1,1'-biphenyl]-2-carboxamide (3ja)**

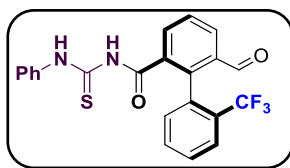

The title compound **3ja** was prepared under the optimized conditions A and purified by preparative TLC (hexane: ethyl acetate = 10:3). **3ja** was obtained as a yellow oil (26.9 mg, 63%). **<sup>1</sup>H NMR (600 MHz, Chloroform-*d*)**  $\delta$  11.98 (s, 1H), 9.59 (s, 1H), 8.63 (s, 1H), 8.24 (dd,  $J = 7.8, 1.4$  Hz, 1H), 8.05 (dd,  $J = 7.7, 1.4$  Hz, 1H), 7.89 (dd,  $J = 8.0, 1.5$  Hz, 1H), 7.76 – 7.71 (m, 2H), 7.68 – 7.65 (m, 1H), 7.59 – 7.57 (m, 2H), 7.44 (d,  $J = 7.5$  Hz, 1H), 7.37 – 7.34 (m, 2H), 7.25 – 7.23 (m, 1H). **<sup>13</sup>C NMR (150 MHz, Chloroform-*d*)**  $\delta$  189.82, 177.67, 166.80, 140.48, 137.53, 135.40, 134.25, 133.08, 132.97, 132.36, 131.95, 131.40, 129.92, 129.63, 129.31 (q,  $J = 29.9$  Hz), 129.01, 127.13 (q,  $J = 5.2$  Hz), 127.10, 124.13, 123.87 (q,  $J = 272.2$  Hz). **<sup>19</sup>F NMR (565 MHz, Chloroform-*d*)**  $\delta$  -58.78 (s, 1CF<sub>3</sub>).

**HRMS (ESI-TOF) (m/z):** Calcd for C<sub>22</sub>H<sub>15</sub>F<sub>3</sub>N<sub>2</sub>NaO<sub>2</sub>S, ([M + Na]<sup>+</sup>), 451.0699; found 451.0699.

**[ $\alpha$ ]<sub>D</sub><sup>20</sup>** = -28.0 (c = 1.3, CH<sub>2</sub>Cl<sub>2</sub>).

**HPLC analysis:** Daicel Chiralpak AD-3 column (95:5 hexane: 2-propanol, 1.0 mL/min, 25 °C, 254 nm);

$t_R$  (minor) = 20.17 min,  $t_R$  (major) = 27.74 min, 92% ee.

mV

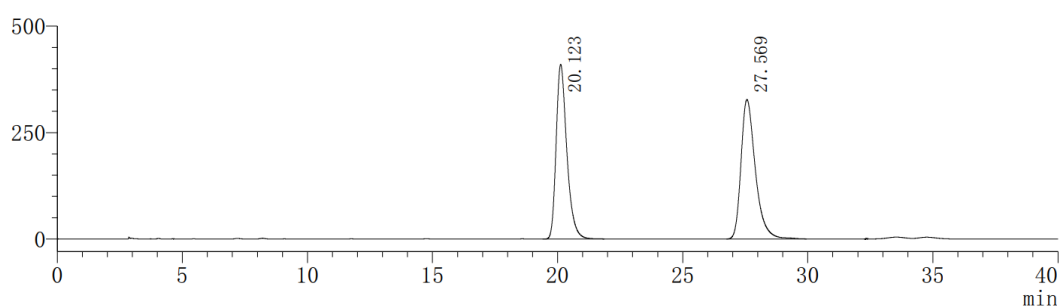

| Peak | Pet Time | Type | Width(min) | Area     | Hight  | Area%   |
|------|----------|------|------------|----------|--------|---------|
| 1    | 20.123   | M    | 0.7591     | 12191329 | 410278 | 48.2337 |
| 2    | 27.569   | M    | 1.0121     | 13084189 | 327854 | 51.7663 |

mV

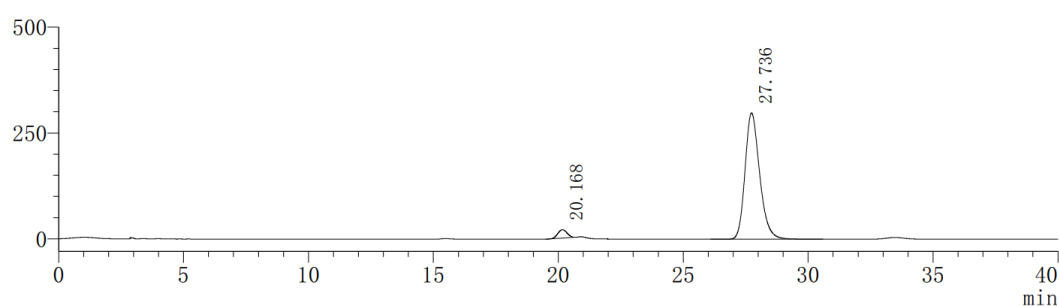

| Peak | Pet Time | Type | Width(min) | Area     | Hight  | Area%   |
|------|----------|------|------------|----------|--------|---------|
| 1    | 20.168   | M    | 0.6938     | 504737   | 19853  | 3.9876  |
| 2    | 27.736   | M    | 1.0564     | 12152974 | 298631 | 96.0124 |

**(R)-6-formyl-N-(phenylcarbamothioyl)-2'-vinyl-[1,1'-biphenyl]-2-carboxamide (3ka)**

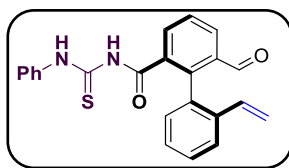

The title compound **3ka** was prepared under the optimized conditions A and purified by preparative TLC (hexane: ethyl acetate = 10:3). **3ka** was obtained as a yellow oil (27.0 mg, 70%). <sup>1</sup>H NMR (600 MHz, Chloroform-*d*) δ 12.08 (s, 1H), 9.65 (d, *J* = 0.8 Hz, 1H), 8.46 (s, 1H), 8.24 (dd, *J* = 7.8, 1.4 Hz, 1H), 8.09 (dd, *J* = 7.7, 1.5 Hz, 1H), 7.76 (dd, *J* = 7.7, 1.3 Hz, 1H), 7.70 (td, *J* = 7.8, 0.8 Hz, 1H), 7.60 – 7.58 (m, 2H), 7.54 (td, *J* = 7.7, 1.3 Hz, 1H), 7.46 (td, *J* = 7.5, 1.3 Hz, 1H), 7.38 – 7.34 (m, 2H), 7.28 (dd, *J* = 7.5, 1.4 Hz, 1H), 7.25 – 7.22 (m, 1H), 6.38 (dd, *J* = 17.4, 11.0 Hz, 1H), 5.75 (dd, *J* = 17.3, 0.8 Hz, 1H), 5.29 (dd, *J* = 11.0, 0.8 Hz, 1H). <sup>13</sup>C NMR (150 MHz, Chloroform-*d*) δ 190.87, 177.61, 167.29, 142.37, 137.58, 137.48, 135.19, 134.59, 134.18, 133.65, 132.07, 131.26, 130.40, 130.26, 129.08, 128.99, 128.81, 127.01, 126.86, 124.08, 118.74.

**HRMS** (ESI-TOF) (*m/z*): Calcd for C<sub>23</sub>H<sub>18</sub>N<sub>2</sub>NaO<sub>2</sub>S, ([M + Na]<sup>+</sup>), 409.0981; found 409.0980.

[α]<sub>D</sub><sup>20</sup> = -18.8 (c = 1.4, CH<sub>2</sub>Cl<sub>2</sub>).

**HPLC analysis:** Daicel Chiralpak AD-3 column (95:5 hexane: 2-propanol, 1.0 mL/min, 25 °C, 254 nm);

*t<sub>R</sub>* (minor) = 22.56 min, *t<sub>R</sub>* (major) = 27.40 min, 95% ee.

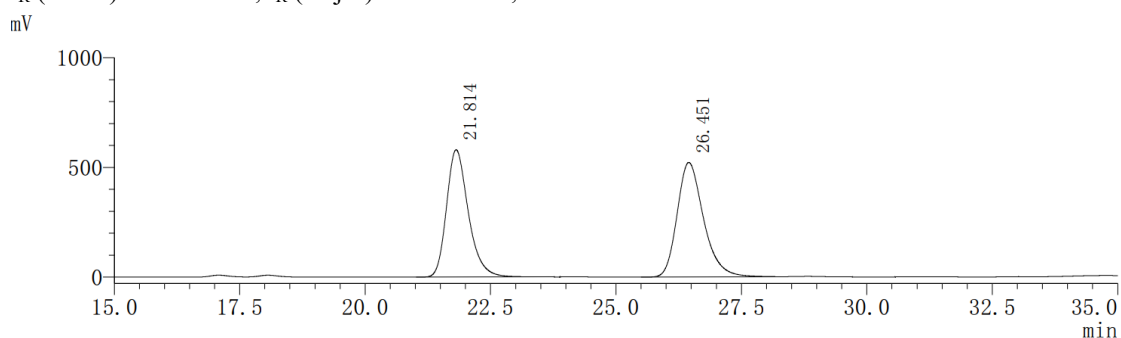

| Peak | Pet Time | Type | Width(min) | Area     | Hight  | Area%   |
|------|----------|------|------------|----------|--------|---------|
| 1    | 21.814   | M    | 0.7757     | 17580171 | 580416 | 47.8992 |
| 2    | 26.451   | M    | 0.9397     | 19122252 | 522116 | 52.1008 |

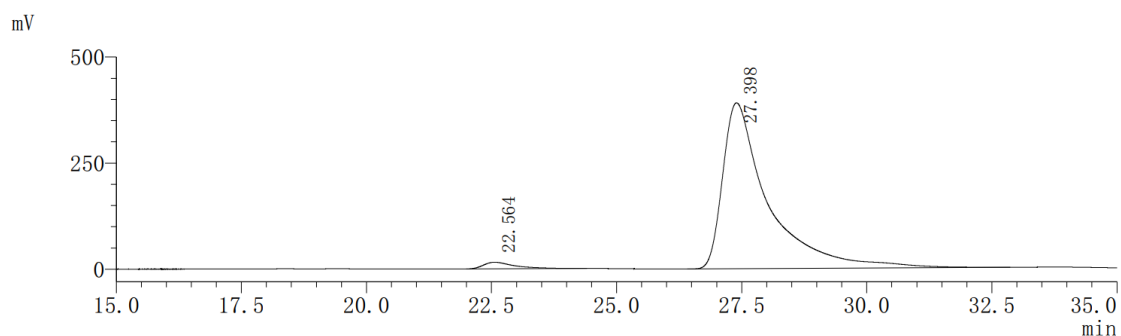

| Peak | Pet Time | Type | Width(min) | Area     | Hight  | Area%   |
|------|----------|------|------------|----------|--------|---------|
| 1    | 22.564   | M    | 1.0735     | 669202   | 15660  | 2.6259  |
| 2    | 27.398   | M    | 1.3463     | 24815579 | 391144 | 97.3741 |

**(R)-6-formyl-N-(phenylcarbamothioyl)-2'-(prop-1-en-2-yl)-[1,1'-biphenyl]-2-carboxamide (3la)**

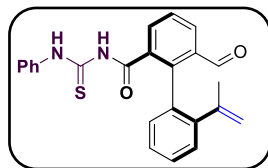

The title compound **3la** was prepared under the optimized conditions A and purified by preparative TLC (hexane: ethyl acetate = 10:3). **3la** was obtained as a yellow oil (24.0 mg, 60%). **<sup>1</sup>H NMR (500 MHz, Chloroform-*d*)**  $\delta$  12.16 (s, 1H), 9.72 (d,  $J = 0.9$  Hz, 1H), 8.47 (s, 1H), 8.22 (dd,  $J = 7.8, 1.4$  Hz, 1H), 8.08 (dd,  $J = 7.7, 1.4$  Hz, 1H), 7.67 (td,  $J = 7.8, 0.9$  Hz, 1H), 7.62 – 7.60 (m, 2H), 7.54 – 7.46 (m, 3H), 7.39 – 7.35 (m, 2H), 7.29 (dd,  $J = 7.3, 1.4$  Hz, 1H), 7.26 – 7.23 (m, 1H), 5.09 (p,  $J = 1.5$  Hz, 1H), 4.88 (t,  $J = 1.3$  Hz, 1H), 1.68 (t,  $J = 1.1$  Hz, 3H). **<sup>13</sup>C NMR (150 MHz, Chloroform-*d*)**  $\delta$  190.95, 177.77, 167.42, 144.22, 143.91, 143.61, 137.64, 135.14, 134.24, 133.91, 131.44, 131.14, 130.63, 130.41, 129.90, 129.02, 128.80, 128.38, 127.02, 124.11, 118.84, 23.20.

**HRMS (ESI-TOF) (m/z):** Calcd for C<sub>24</sub>H<sub>20</sub>N<sub>2</sub>NaO<sub>2</sub>S, ([M + Na]<sup>+</sup>), 423.1138; found 423.1131.

**$[\alpha]_D^{20}$**  = -36.0 ( $c = 1.2, \text{CH}_2\text{Cl}_2$ ).

**HPLC analysis:** Daicel Chiralpak AD-3 column (95:5 hexane: 2-propanol, 1.0 mL/min, 25 °C, 254 nm);

$t_R$  (minor) = 15.89 min,  $t_R$  (major) = 21.94 min, 96% ee.

mV

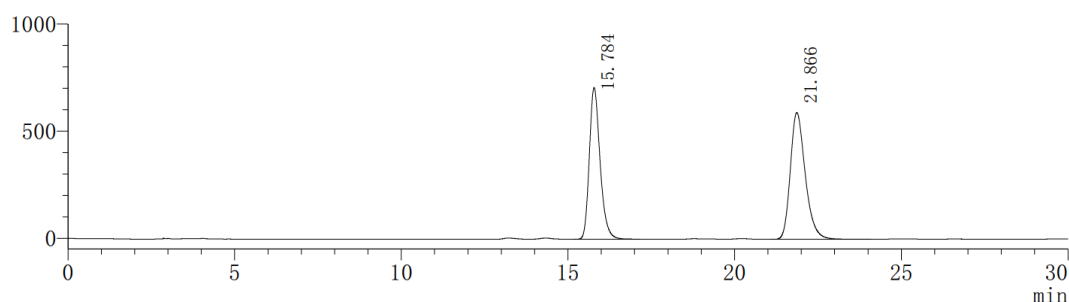

| Peak | Pet Time | Type | Width(min) | Area     | Hight  | Area%   |
|------|----------|------|------------|----------|--------|---------|
| 1    | 15.784   | M    | 0.5762     | 15850315 | 707353 | 46.2565 |
| 2    | 21.866   | M    | 0.8027     | 18415841 | 591568 | 53.7435 |

mV

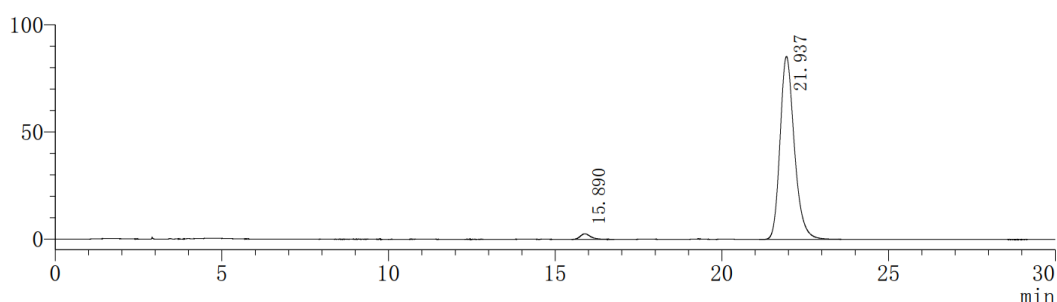

| Peak | Pet Time | Type | Width(min) | Area    | Hight | Area%   |
|------|----------|------|------------|---------|-------|---------|
| 1    | 15.890   | M    | 0.5594     | 55851   | 2589  | 2.1460  |
| 2    | 21.937   | M    | 0.7725     | 2546664 | 85392 | 97.8540 |

**(R)-3'-fluoro-6-formyl-2'-methyl-N-(phenylcarbamothioyl)-[1,1'-biphenyl]-2-carboxamide (3ma)**

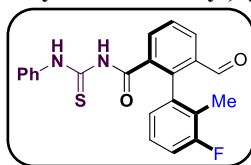

The title compound **3ma** was prepared under the optimized conditions A and purified by preparative TLC (hexane: ethyl acetate = 10:3). **3ma** was obtained as a yellow oil (27.4 mg, 70%). <sup>1</sup>H NMR (600 MHz, Chloroform-*d*) δ 12.06 (s, 1H), 9.66 (d, *J* = 0.8 Hz, 1H), 8.57 (s, 1H), 8.24 (dd, *J* = 7.9, 1.4 Hz, 1H), 8.09 (dd, *J* = 7.7, 1.4 Hz, 1H), 7.72 (td, *J* = 7.7, 0.8 Hz, 1H), 7.62 – 7.60 (m, 2H), 7.38 – 7.34 (m, 3H), 7.26 – 7.23 (m, 1H), 7.21 (td, *J* = 8.3, 1.1 Hz, 1H), 7.06 (dd, *J* = 7.5, 1.1 Hz, 1H), 2.06 (d, *J* = 2.2 Hz, 3H). <sup>13</sup>C NMR (150 MHz, Chloroform-*d*) δ 190.51, 177.50, 167.00, 161.92 (d, *J* = 246.5 Hz), 141.86 (d, *J* = 2.7 Hz), 137.49, 135.76 (d, *J* = 4.4 Hz), 135.00, 134.23, 133.92, 131.39, 129.24, 129.03, 128.20 (d, *J* = 9.1 Hz), 127.10, 125.43 (d, *J* = 3.5 Hz), 124.71 (d, *J* = 17.3 Hz), 124.05, 116.76 (d, *J* = 22.5 Hz), 12.49 (d, *J* = 4.5 Hz). <sup>19</sup>F NMR (565 MHz, Chloroform-*d*) δ -113.48 – -113.50 (m, 1F).

**HRMS** (ESI-TOF) (*m/z*): Calcd for C<sub>22</sub>H<sub>17</sub>FN<sub>2</sub>NaO<sub>2</sub>S, ([M + Na]<sup>+</sup>), 415.0887; found 415.0896.

[α]<sub>D</sub><sup>20</sup> = -26.7 (c = 1.4, CH<sub>2</sub>Cl<sub>2</sub>).

**HPLC analysis:** Daicel Chiralpak AD-3 column (95:5 hexane: 2-propanol, 1.0 mL/min, 25 °C, 254 nm);

*t<sub>R</sub>* (minor) = 15.52 min, *t<sub>R</sub>* (major) = 21.31 min, 90% ee.

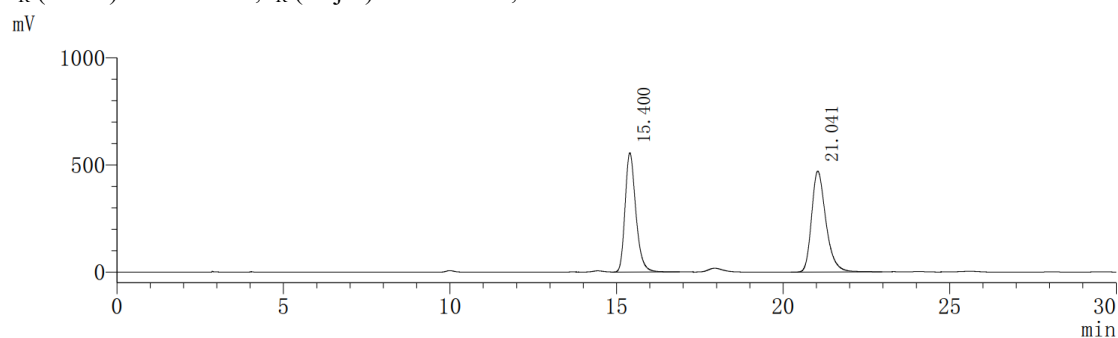

| Peak | Pet Time | Type | Width(min) | Area     | Hight  | Area%   |
|------|----------|------|------------|----------|--------|---------|
| 1    | 15.400   | M    | 0.5759     | 12475223 | 556329 | 46.9402 |
| 2    | 21.041   | M    | 0.7670     | 14101601 | 470739 | 53.0598 |

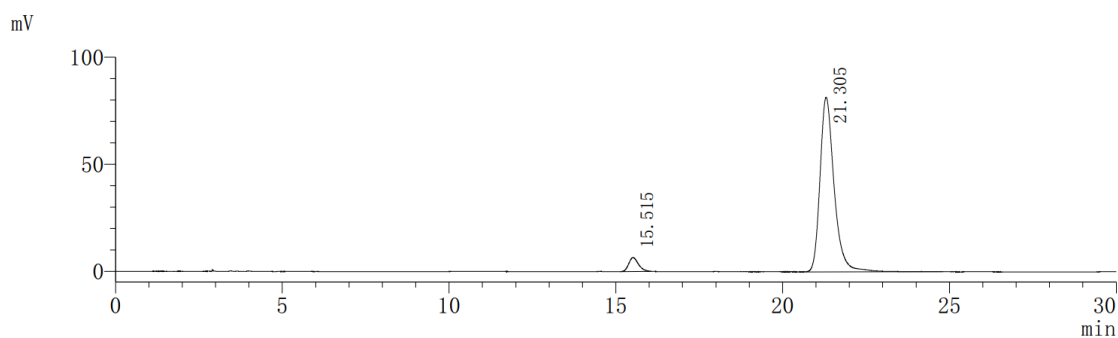

| Peak | Pet Time | Type | Width(min) | Area    | Hight | Area%   |
|------|----------|------|------------|---------|-------|---------|
| 1    | 15.515   | M    | 0.5247     | 131597  | 6532  | 5.1931  |
| 2    | 21.305   | M    | 0.7449     | 2402486 | 81546 | 94.8069 |

**(R)-6-formyl-2',3'-dimethyl-N-(phenylcarbamothioyl)-[1,1'-biphenyl]-2-carboxamide (3na)**

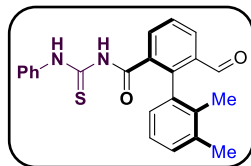

The title compound **3na** was prepared under the optimized conditions A and purified by preparative TLC (hexane: ethyl acetate = 10:3). **3na** was obtained as a yellow oil (27.9 mg, 72%). <sup>1</sup>H NMR (500 MHz, Chloroform-*d*) δ 12.16 (s, 1H), 9.63 (d, *J* = 0.8 Hz, 1H), 8.50 (s, 1H), 8.22 (dd, *J* = 7.8, 1.4 Hz, 1H), 8.18 (dd, *J* = 7.8, 1.4 Hz, 1H), 7.68 (t, *J* = 7.8 Hz, 1H), 7.62 – 7.60 (m, 2H), 7.37 – 7.33 (m, 3H), 7.29 (t, *J* = 7.5 Hz, 1H), 7.25 – 7.21 (m, 1H), 7.08 (d, *J* = 7.4 Hz, 1H), 2.39 (s, 3H), 2.07 (s, 3H). <sup>13</sup>C NMR (150 MHz, Chloroform-*d*) δ 191.18, 177.50, 167.03, 143.95, 139.17, 137.62, 135.04, 135.03, 134.77, 133.74, 133.24, 131.79, 131.26, 128.97, 128.74, 127.59, 126.93, 126.91, 123.97, 20.70, 17.16.

HRMS (ESI-TOF) (*m/z*): Calcd for C<sub>23</sub>H<sub>20</sub>N<sub>2</sub>NaO<sub>2</sub>S, ([M + Na]<sup>+</sup>), 411.1138; found 411.1125.

[α]<sub>D</sub><sup>20</sup> = -26.2 (*c* = 1.4, CH<sub>2</sub>Cl<sub>2</sub>).

HPLC analysis: Daicel Chiralpak AD-3 column (95:5 hexane: 2-propanol, 1.0 mL/min, 25 °C, 254 nm);

*t*<sub>R</sub> (minor) = 17.36 min, *t*<sub>R</sub> (major) = 19.91 min, 99% ee.

mV

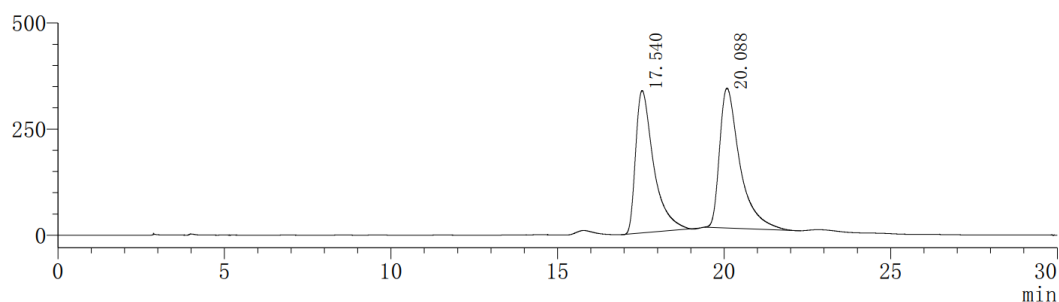

| Peak | Pet Time | Type | Width(min) | Area     | Hight  | Area%   |
|------|----------|------|------------|----------|--------|---------|
| 1    | 17.540   | M    | 0.9257     | 12618520 | 335821 | 47.3899 |
| 2    | 20.088   | M    | 1.0401     | 14008523 | 329812 | 52.6101 |

mV

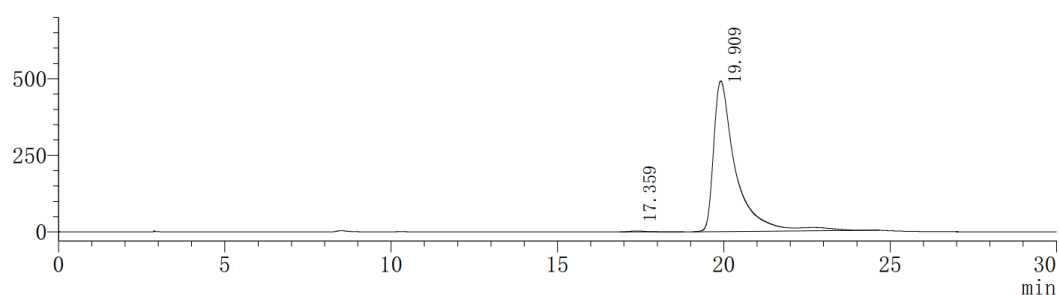

| Peak | Pet Time | Type | Width(min) | Area     | Hight  | Area%   |
|------|----------|------|------------|----------|--------|---------|
| 1    | 17.359   | M    | 0.8973     | 135989   | 3481   | 0.5942  |
| 2    | 19.909   | M    | 1.0109     | 22749575 | 490968 | 99.4058 |



**(R)-3'-chloro-6-formyl-2'-methyl-N-(phenylcarbamothioyl)-[1,1'-biphenyl]-2-carboxamide (3oa)**

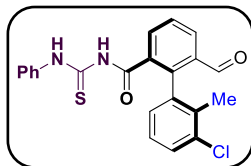

The title compound **3oa** was prepared under the optimized conditions A and purified by preparative TLC (hexane: ethyl acetate = 10:3). **3oa** was obtained as a yellow oil (27.3 mg, 67%). <sup>1</sup>H NMR (500 MHz, Chloroform-*d*) δ 12.02 (s, 1H), 9.65 (d, *J* = 0.9 Hz, 1H), 8.58 (s, 1H), 8.23 (dd, *J* = 7.8, 1.4 Hz, 1H), 8.07 (dd, *J* = 7.7, 1.4 Hz, 1H), 7.71 (td, *J* = 7.8, 0.9 Hz, 1H), 7.62 – 7.60 (m, 2H), 7.54 (dd, *J* = 8.2, 1.2 Hz, 1H), 7.39 – 7.36 (m, 2H), 7.31 (t, *J* = 7.8 Hz, 1H), 7.27 – 7.23 (m, 1H), 7.15 (dd, *J* = 7.7, 1.2 Hz, 1H), 2.18 (s, 3H). <sup>13</sup>C NMR (150 MHz, Chloroform-*d*) δ 190.45, 177.51, 166.96, 142.70, 137.50, 136.54, 135.44, 135.30, 134.99, 134.25, 133.70, 131.37, 130.83, 129.21, 129.02, 128.23, 127.61, 127.10, 124.07, 18.10.

**HRMS** (ESI-TOF) (*m/z*): Calcd for C<sub>22</sub>H<sub>18</sub>ClN<sub>2</sub>O<sub>2</sub>S, ([M + H]<sup>+</sup>), 409.0772; found 409.0763.

[α]<sub>D</sub><sup>20</sup> = -32.4 (*c* = 1.3, CH<sub>2</sub>Cl<sub>2</sub>).

**HPLC analysis:** Daicel Chiralpak AD-3 column (95:5 hexane: 2-propanol, 1.0 mL/min, 25 °C, 254 nm); *t<sub>R</sub>* (minor) = 15.98 min, *t<sub>R</sub>* (major) = 19.98 min, 96% ee.

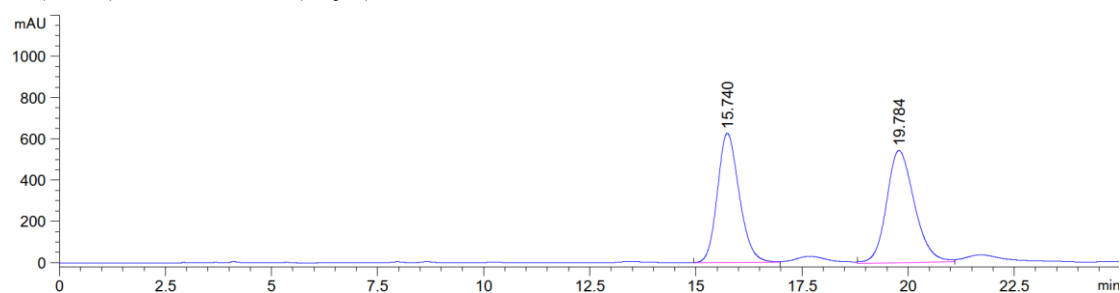

| Peak | Pet Time | Type | Width(min) | Area(mAU*S) | Hight(mAU) | Area%   |
|------|----------|------|------------|-------------|------------|---------|
| 1    | 15.740   | MM R | 0.5970     | 2.24424e4   | 626.57648  | 47.5663 |
| 2    | 19.784   | MM R | 0.7586     | 2.47388e4   | 543.54486  | 52.4337 |

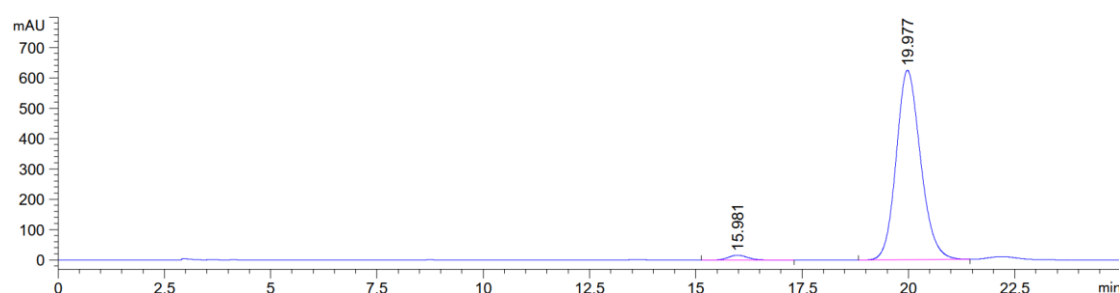

| Peak | Pet Time | Type | Width(min) | Area(mAU*S) | Hight(mAU) | Area%   |
|------|----------|------|------------|-------------|------------|---------|
| 1    | 15.981   | MM   | 0.4983     | 538.36951   | 16.51801   | 2.1169  |
| 2    | 19.977   | MM   | 0.6162     | 2.48932e4   | 624.30591  | 97.8831 |

**(R)-4'-fluoro-6-formyl-2'-methyl-N-(phenylcarbamothioyl)-[1,1'-biphenyl]-2-carboxamide (3pa)**

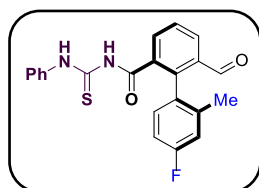

The title compound **3pa** was prepared under the optimized conditions A and purified by preparative TLC (hexane: ethyl acetate = 10:3). **3pa** was obtained as a yellow oil (27.4 mg, 70%). <sup>1</sup>H NMR (500 MHz, Chloroform-*d*) δ 12.08 (s, 1H), 9.65 (d, *J* = 0.8 Hz, 1H), 8.57 (s, 1H), 8.23 (dd, *J* = 7.8, 1.4 Hz, 1H), 8.09 (dd, *J* = 7.7, 1.4 Hz, 1H), 7.70 (td, *J* = 7.8, 0.9 Hz, 1H), 7.62 – 7.60 (m, 2H), 7.37 (t, *J* = 7.9 Hz, 2H), 7.27 – 7.21 (m, 2H), 7.13 (dd, *J* = 9.4, 2.6 Hz, 1H), 7.08 (td, *J* = 8.2, 2.7 Hz, 1H), 2.13 (s, 3H). <sup>13</sup>C NMR (150 MHz, Chloroform-*d*) δ 190.72, 177.53, 167.11, 163.40 (d, *J* = 248.1 Hz), 142.38, 139.52 (d, *J* = 8.2 Hz), 137.46, 135.20, 134.40, 133.94, 131.41, 131.33 (d, *J* = 8.6 Hz), 129.28 (d, *J* = 3.3 Hz), 129.11, 129.03, 127.10, 124.04, 118.11 (d, *J* = 21.5 Hz), 114.14 (d, *J* = 21.6 Hz), 20.62. <sup>19</sup>F NMR (565 MHz, Chloroform-*d*) δ -111.45 – -111.50 (m, 1F).

**HRMS** (ESI-TOF) (*m/z*): Calcd for C<sub>22</sub>H<sub>18</sub>FN<sub>2</sub>O<sub>2</sub>S, ([M + H]<sup>+</sup>), 393.1068; found 393.1052.

[α]<sub>D</sub><sup>20</sup> = -20.4 (c = 1.3, CH<sub>2</sub>Cl<sub>2</sub>).

**HPLC analysis:** Daicel Chiralpak AD-3 column (95:5 hexane: 2-propanol, 1.0 mL/min, 25 °C, 254 nm);

*t<sub>R</sub>* (minor) = 20.28 min, *t<sub>R</sub>* (major) = 22.33 min, 97% ee.

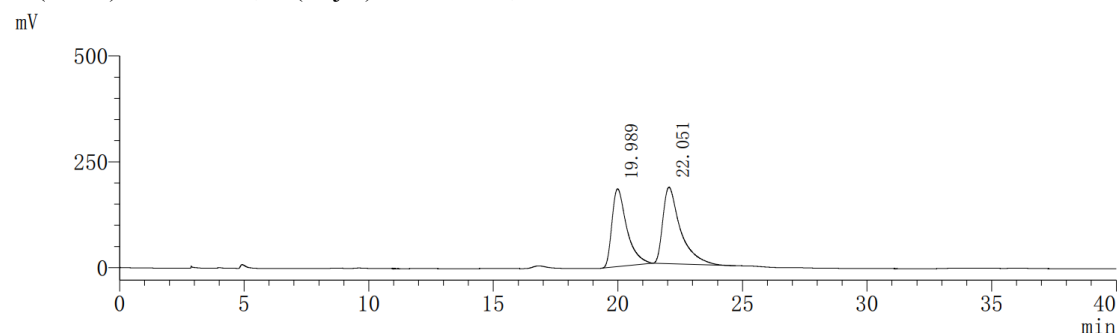

| Peak | Pet Time | Type | Width(min) | Area    | Hight  | Area%   |
|------|----------|------|------------|---------|--------|---------|
| 1    | 19.989   | M    | 1.0480     | 7643918 | 183898 | 46.2648 |
| 2    | 22.051   | M    | 1.1942     | 8878198 | 180498 | 53.7352 |

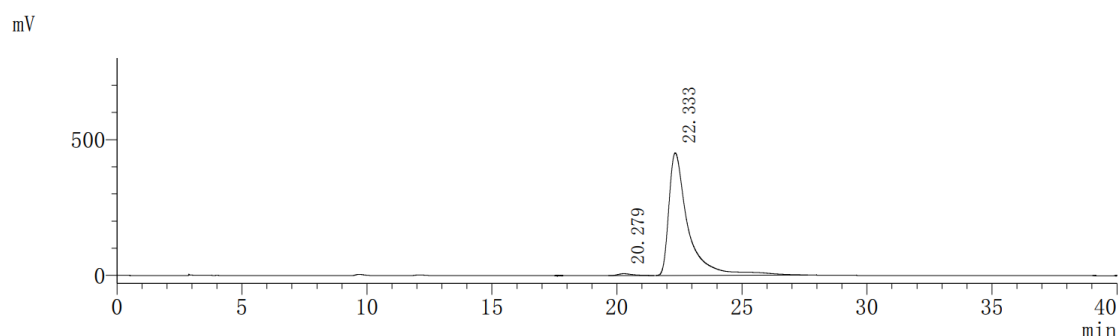

| Peak | Pet Time | Type | Width(min) | Area     | Hight  | Area%   |
|------|----------|------|------------|----------|--------|---------|
| 1    | 20.279   | M    | 1.0758     | 330440   | 7366   | 1.3482  |
| 2    | 22.333   | M    | 1.1871     | 24178834 | 451210 | 98.6518 |

**(R)-6-formyl-2',4'-dimethyl-N-(phenylcarbamothioyl)-[1,1'-biphenyl]-2-carboxamide (3qa)**

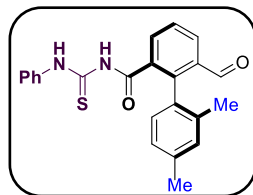

The title compound **3qa** was prepared under the optimized conditions A and purified by preparative TLC (hexane: ethyl acetate = 10:3). **3qa** was obtained as a yellow oil (33.0 mg, 85%). <sup>1</sup>H NMR (500 MHz, Chloroform-*d*) δ 12.20 (s, 1H), 9.65 (d, *J* = 0.9 Hz, 1H), 8.51 (s, 1H), 8.22 (dd, *J* = 7.8, 1.5 Hz, 1H), 8.17 (dd, *J* = 7.7, 1.5 Hz, 1H), 7.67 (td, *J* = 7.8, 0.9 Hz, 1H), 7.63 – 7.61 (m, 2H), 7.38 – 7.35 (m, 2H), 7.25 – 7.20 (m, 3H), 7.14 (d, *J* = 7.7 Hz, 1H), 2.41 (s, 3H), 2.09 (s, 3H). <sup>13</sup>C NMR (150 MHz, Chloroform-*d*) δ 191.22, 177.63, 167.16, 143.49, 140.34, 137.63, 136.33, 135.13, 134.69, 133.84, 132.27, 131.36, 130.06, 129.68, 128.97, 128.74, 128.01, 126.94, 124.02, 21.47, 20.28.

HRMS (ESI-TOF) (*m/z*): Calcd for C<sub>23</sub>H<sub>21</sub>N<sub>2</sub>O<sub>2</sub>S, ([M + H]<sup>+</sup>), 389.1318; found 389.1311.

[α]<sub>D</sub><sup>20</sup> = -25.2 (*c* = 1.6, CH<sub>2</sub>Cl<sub>2</sub>).

HPLC analysis: Daicel Chiralpak AD-3 column (95:5 hexane: 2-propanol, 1.0 mL/min, 25 °C, 254 nm);

*t*<sub>R</sub> (minor) = 15.70 min, *t*<sub>R</sub> (major) = 18.07 min, 97% ee.

mV

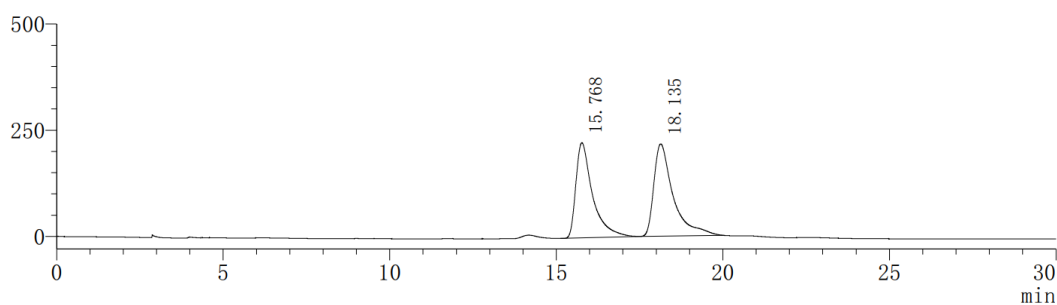

| Peak | Pet Time | Type | Width(min) | Area    | Hight  | Area%   |
|------|----------|------|------------|---------|--------|---------|
| 1    | 15.768   | M    | 0.8241     | 7805998 | 224141 | 47.0985 |
| 2    | 18.135   | M    | 0.9375     | 8767757 | 217332 | 52.9015 |

mV

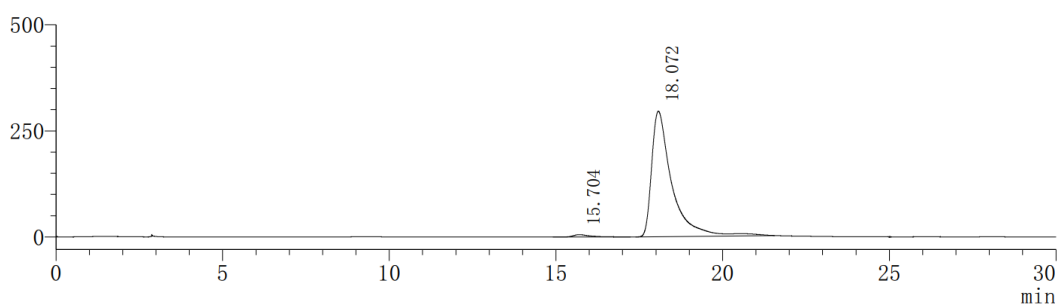

| Peak | Pet Time | Type | Width(min) | Area     | Hight  | Area%   |
|------|----------|------|------------|----------|--------|---------|
| 1    | 15.704   | M    | 0.9044     | 215221   | 5648   | 1.6971  |
| 2    | 18.072   | M    | 0.9508     | 12466214 | 295934 | 98.3029 |

**(R)-6-formyl-4'-methoxy-2'-methyl-N-(phenylcarbamothioyl)-[1,1'-biphenyl]-2-carboxamide (3ra)**

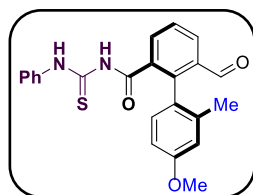

The title compound **3ra** was prepared under the optimized conditions A and purified by preparative TLC (hexane: ethyl acetate = 10:3). **3ra** was obtained as a yellow oil (32.7 mg, 81%). <sup>1</sup>H NMR (500 MHz, Chloroform-*d*) δ 12.20 (s, 1H), 9.67 (s, 1H), 8.54 (s, 1H), 8.21 (dd, *J* = 7.7, 1.5 Hz, 1H), 8.16 (dd, *J* = 7.8, 1.5 Hz, 1H), 7.67 (t, *J* = 7.8 Hz, 1H), 7.64 – 7.62 (m, 2H), 7.38 – 7.35 (m, 2H), 7.25 – 7.22 (m, 1H), 7.17 (d, *J* = 8.3 Hz, 1H), 6.96 – 6.92 (m, 2H), 3.87 (s, 3H), 2.11 (s, 3H). <sup>13</sup>C NMR (150 MHz, Chloroform-*d*) δ 191.29, 177.62, 167.20, 160.92, 143.17, 138.20, 137.64, 135.46, 134.65, 134.13, 131.37, 130.99, 128.98, 128.75, 126.95, 125.07, 124.00, 117.06, 112.84, 55.63, 20.67.

HRMS (ESI-TOF) (*m/z*): Calcd for C<sub>23</sub>H<sub>21</sub>N<sub>2</sub>O<sub>3</sub>S, ([M + H]<sup>+</sup>), 405.1267; found 405.1261.

[α]<sub>D</sub><sup>20</sup> = -32.0 (*c* = 1.6, CH<sub>2</sub>Cl<sub>2</sub>).

HPLC analysis: Daicel Chiralpak OD-3 column (95:5 hexane: 2-propanol, 1.0 mL/min, 25 °C, 254 nm);

*t*<sub>R</sub> (major) = 16.89 min, *t*<sub>R</sub> (minor) = 22.06 min, 99% ee.

mV

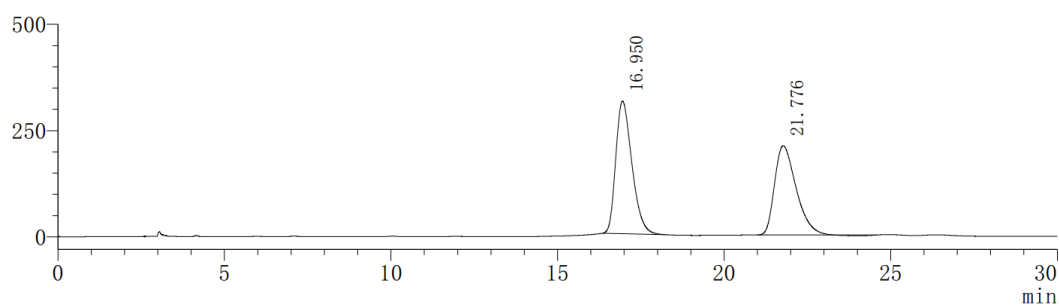

| Peak | Pet Time | Type | Width(min) | Area     | Hight  | Area%   |
|------|----------|------|------------|----------|--------|---------|
| 1    | 16.950   | M    | 0.8894     | 10537414 | 312211 | 52.8848 |
| 2    | 21.776   | M    | 1.1930     | 9387812  | 210108 | 47.1152 |

mV

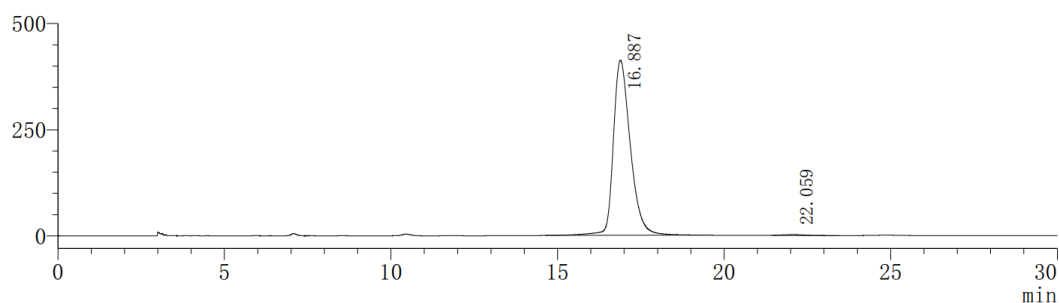

| Peak | Pet Time | Type | Width(min) | Area     | Hight  | Area%   |
|------|----------|------|------------|----------|--------|---------|
| 1    | 16.887   | M    | 0.9010     | 14691922 | 412657 | 99.4744 |
| 2    | 22.059   | M    | 1.0797     | 77634    | 1892   | 0.5256  |

**(R)-5'-fluoro-6-formyl-2'-methyl-N-(phenylcarbamothioyl)-[1,1'-biphenyl]-2-carboxamide (3sa)**

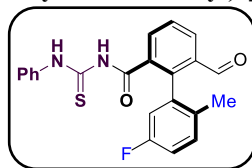

The title compound **3sa** was prepared under the optimized conditions A and purified by preparative TLC (hexane: ethyl acetate = 10:3). **3sa** was obtained as a yellow oil (29.4 mg, 75%). <sup>1</sup>H NMR (500 MHz, Chloroform-*d*) δ 12.07 (s, 1H), 9.65 (s, 1H), 8.64 (s, 1H), 8.23 (dd, *J* = 7.9, 1.5 Hz, 1H), 8.10 (dd, *J* = 7.8, 1.5 Hz, 1H), 7.71 (t, *J* = 7.8 Hz, 1H), 7.62 – 7.60 (m, 2H), 7.39 – 7.35 (m, 3H), 7.26 – 7.23 (m, 1H), 7.14 (td, *J* = 8.4, 2.8 Hz, 1H), 7.00 (dd, *J* = 8.5, 2.8 Hz, 1H), 2.10 (s, 3H). <sup>13</sup>C NMR (150 MHz, Chloroform-*d*) δ 190.49, 177.57, 166.90, 161.32 (d, *J* = 246.4 Hz), 142.12, 137.51, 135.05 (d, *J* = 7.3 Hz), 134.83, 134.02, 133.97, 132.76 (d, *J* = 8.1 Hz), 132.49 (d, *J* = 3.4 Hz), 131.43, 129.26, 129.02, 127.09, 124.08, 116.97 (d, *J* = 20.5 Hz), 116.71 (d, *J* = 22.1 Hz), 19.61. <sup>19</sup>F NMR (565 MHz, Chloroform-*d*) δ -115.41 – -115.45 (m, 1F).

**HRMS** (ESI-TOF) (*m/z*): Calcd for C<sub>22</sub>H<sub>18</sub>FN<sub>2</sub>O<sub>2</sub>S, ([M + H]<sup>+</sup>), 393.1068; found 393.1062.

[α]<sub>D</sub><sup>20</sup> = -35.6 (c = 1.5, CH<sub>2</sub>Cl<sub>2</sub>).

**HPLC analysis:** Daicel Chiralpak AD-3 column (95:5 hexane: 2-propanol, 1.0 mL/min, 25 °C, 254 nm); t<sub>R</sub> (major) = 20.24 min, t<sub>R</sub> (minor) = 24.48 min, 99% ee.

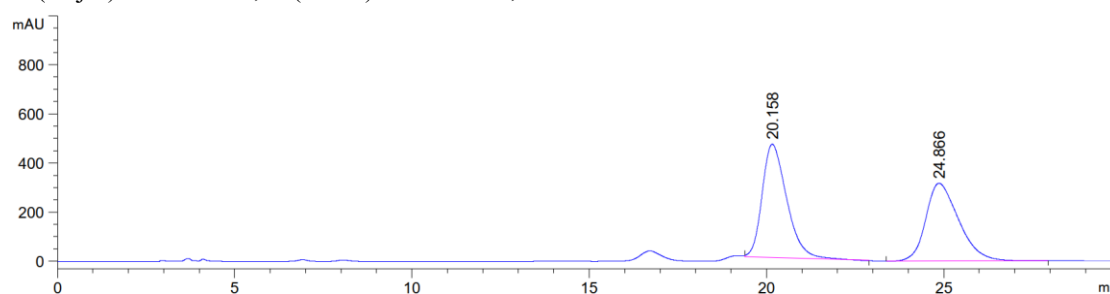

| Peak | Ret Time | Type | Width(min) | Area(mAU*S) | Height(mAU) | Area%   |
|------|----------|------|------------|-------------|-------------|---------|
| 1    | 20.158   | MM   | 0.8023     | 2.21882e4   | 460.91681   | 52.0782 |
| 2    | 24.866   | MM   | 1.0098     | 2.04174e4   | 316.40860   | 47.9218 |

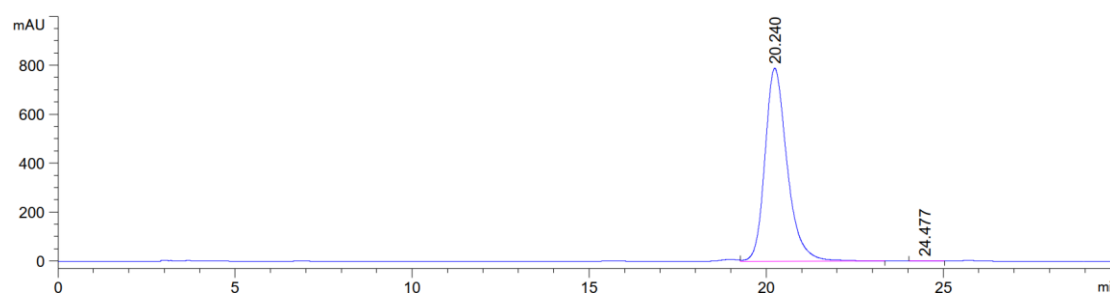

| Peak | Ret Time | Type | Width(min) | Area(mAU*S) | Height(mAU) | Area%   |
|------|----------|------|------------|-------------|-------------|---------|
| 1    | 20.240   | MM   | 0.7259     | 3.43356e4   | 788.31769   | 99.8955 |
| 2    | 24.477   | MM   | 0.5497     | 35.91503    | 1.08898     | 0.1045  |

**(R)-6-formyl-2',5'-dimethyl-N-(phenylcarbamothioyl)-[1,1'-biphenyl]-2-carboxamide (3ta)**

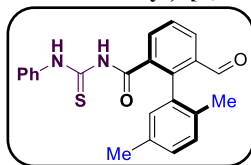

The title compound **3ta** was prepared under the optimized conditions A and purified by preparative TLC (hexane: ethyl acetate = 10:3). **3ta** was obtained as a yellow oil (27.9 mg, 72%). <sup>1</sup>H NMR (500 MHz, Chloroform-*d*) δ 12.19 (s, 1H), 9.64 (s, 1H), 8.56 (s, 1H), 8.23 (dd, *J* = 7.8, 1.5 Hz, 1H), 8.17 (dd, *J* = 7.8, 1.5 Hz, 1H), 7.68 (t, *J* = 7.8 Hz, 1H), 7.63 – 7.61 (m, 2H), 7.38 – 7.35 (m, 2H), 7.31 (d, *J* = 7.9 Hz, 1H), 7.27 – 7.22 (m, 2H), 7.09 (d, *J* = 1.8 Hz, 1H), 2.40 (s, 3H), 2.07 (s, 3H). <sup>13</sup>C NMR (150 MHz, Chloroform-*d*) δ 191.14, 177.51, 167.05, 143.44, 137.66, 137.16, 134.94, 134.73, 133.69, 133.42, 133.03, 131.46, 131.29, 131.10, 130.18, 128.95, 128.77, 126.89, 123.94, 21.14, 19.80.

HRMS (ESI-TOF) (*m/z*): Calcd for C<sub>23</sub>H<sub>21</sub>N<sub>2</sub>O<sub>2</sub>S, ([M + H]<sup>+</sup>), 389.1318; found 389.1308.

[α]<sub>D</sub><sup>20</sup> = -6.3 (c = 1.4, CH<sub>2</sub>Cl<sub>2</sub>).

HPLC analysis: Daicel Chiralpak AD-3 column (95:5 hexane: 2-propanol, 1.0 mL/min, 25 °C, 254 nm); t<sub>R</sub> (minor) = 11.92 min, t<sub>R</sub> (major) = 14.96 min, 99% ee.

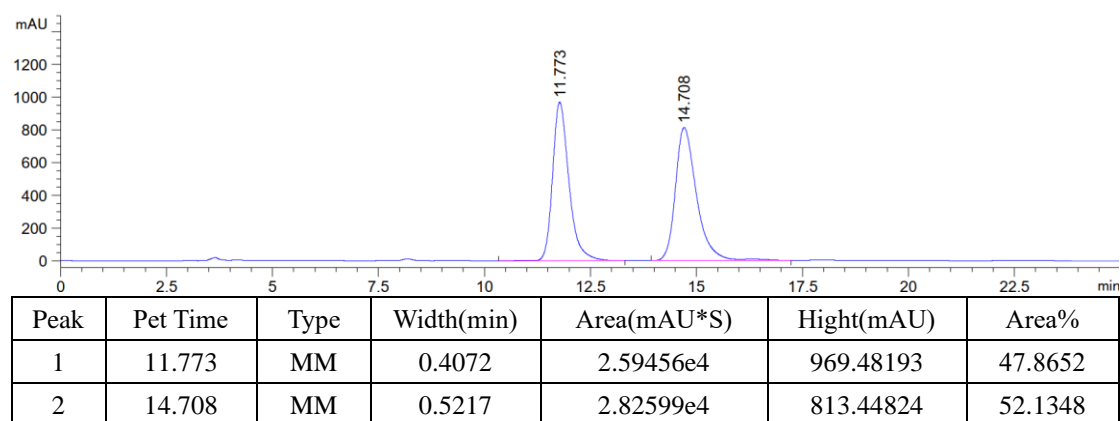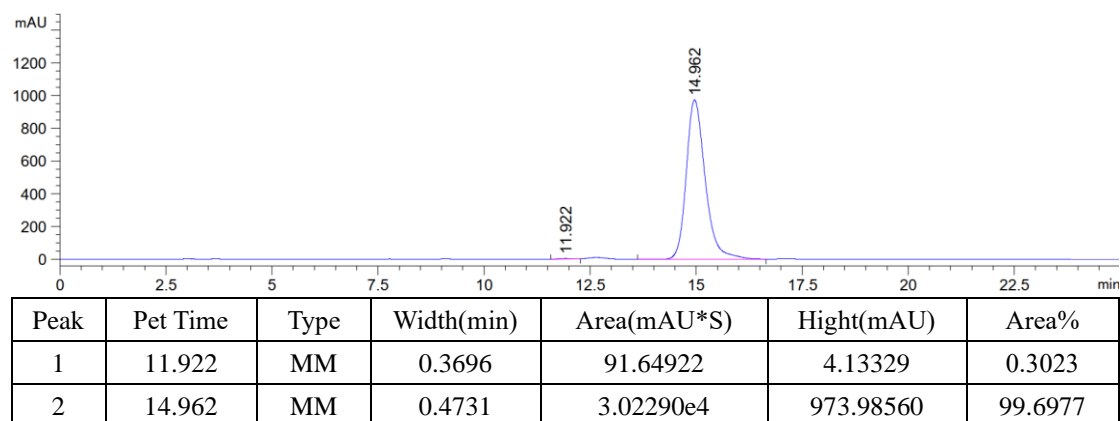

**(R)-6-formyl-2',4',5'-trimethyl-N-(phenylcarbamothioyl)-[1,1'-biphenyl]-2-carboxamide (3ua)**

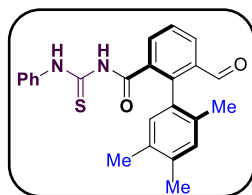

The title compound **3ua** was prepared under the optimized conditions A and purified by preparative TLC (hexane: ethyl acetate = 10:3). **3ua** was obtained as a yellow oil (33.4 mg, 83%). <sup>1</sup>H NMR (500 MHz, Chloroform-*d*) δ 12.24 (s, 1H), 9.68 (s, 1H), 8.21 (td, *J* = 8.2, 1.5 Hz, 2H), 7.66 (t, *J* = 7.8 Hz, 1H), 7.64 – 7.62 (m, 2H), 7.38 – 7.35 (m, 2H), 7.25 – 7.21 (m, 1H), 7.19 (s, 1H), 7.03 (s, 1H), 2.31 (s, 3H), 2.29 (s, 3H), 2.04 (s, 3H). <sup>13</sup>C NMR (150 MHz, Chloroform-*d*) δ 191.19, 177.44, 166.87, 143.42, 138.93, 137.56, 135.80, 134.92, 134.86, 133.49, 133.45, 132.73, 131.18, 130.49, 130.06, 128.79, 128.48, 126.69, 123.77, 19.58, 19.51, 19.33.

HRMS (ESI-TOF) (*m/z*): Calcd for C<sub>24</sub>H<sub>23</sub>N<sub>2</sub>O<sub>2</sub>S, ([M + H]<sup>+</sup>), 403.1475; found 403.1465.

[α]<sub>D</sub><sup>20</sup> = -6.2 (*c* = 1.6, CH<sub>2</sub>Cl<sub>2</sub>).

HPLC analysis: Daicel Chiralpak AD-3 column (95:5 hexane: 2-propanol, 1.0 mL/min, 25 °C, 254 nm); *t*<sub>R</sub> (major) = 14.81 min, *t*<sub>R</sub> (minor) = 19.03 min, 99% ee.

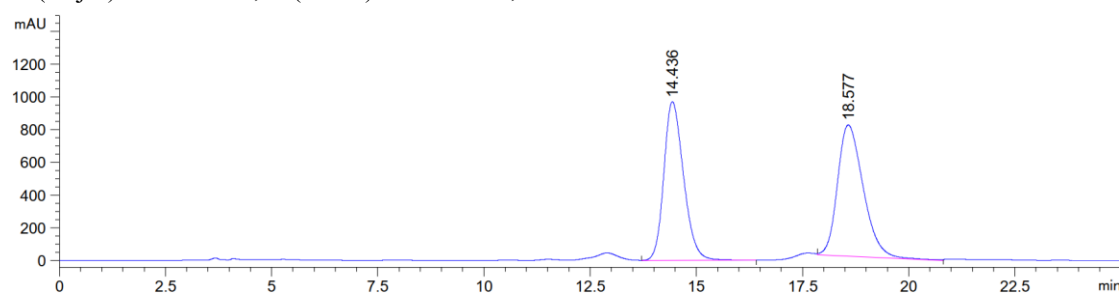

| Peak | Pet Time | Type | Width(min) | Area(mAU*S) | Hight(mAU) | Area%   |
|------|----------|------|------------|-------------|------------|---------|
| 1    | 14.436   | MM   | 0.4975     | 3.13043e4   | 969.98309  | 48.0089 |
| 2    | 18.577   | MM   | 0.7035     | 3.39009e4   | 803.19098  | 51.9911 |

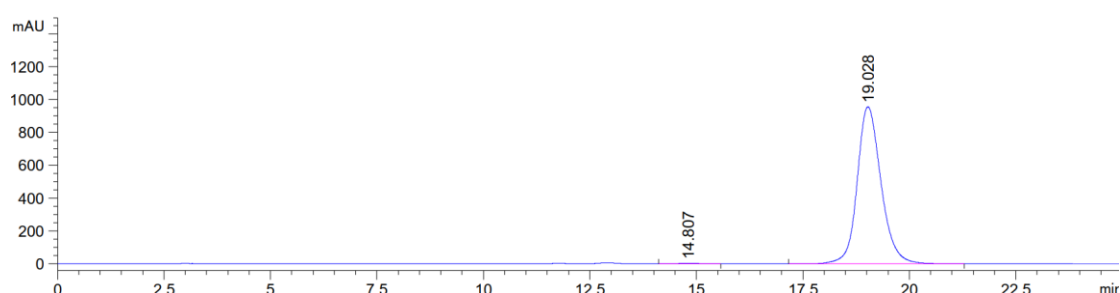

| Peak | Pet Time | Type | Width(min) | Area(mAU*S) | Hight(mAU) | Area%   |
|------|----------|------|------------|-------------|------------|---------|
| 1    | 14.807   | MM   | 0.4506     | 133.58797   | 4.51015    | 0.3571  |
| 2    | 19.028   | MM   | 0.5964     | 3.72798e4   | 957.10712  | 99.6429 |

**(R)-4'-ethoxy-6-formyl-2',5'-dimethyl-N-(phenylcarbamothioyl)-[1,1'-biphenyl]-2-carboxamide (3va)**

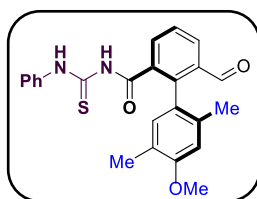

The title compound **3va** was prepared under the optimized conditions A and purified by preparative TLC (hexane: ethyl acetate = 10:3). **3va** was obtained as a yellow oil (32.0 mg, 74%). <sup>1</sup>H NMR (500 MHz, Chloroform-*d*) δ 12.27 (s, 1H), 9.68 (s, 1H), 8.58 (s, 1H), 8.23 – 8.20 (m, 2H), 7.67 – 7.63 (m, 3H), 7.38 – 7.35 (m, 2H), 7.25 – 7.21 (m, 1H), 7.01 (s, 1H), 6.84 (s, 1H), 4.10 (q, *J* = 7.0 Hz, 2H), 2.24 (s, 3H), 2.08 (s, 3H), 1.45 (t, *J* = 7.0 Hz, 3H). <sup>13</sup>C NMR (150 MHz, Chloroform-*d*) δ 191.51, 177.62, 167.06, 158.57, 143.54, 137.77, 135.45, 135.10, 135.07, 133.74, 131.68, 131.36, 128.95, 128.57, 126.83, 126.55, 123.98, 123.92, 114.09, 64.03, 20.35, 16.04, 15.08.

**HRMS** (ESI-TOF) (*m/z*): Calcd for C<sub>25</sub>H<sub>25</sub>N<sub>2</sub>NaO<sub>3</sub>S, ([M + H]<sup>+</sup>), 433.1580; found 433.1577.

[α]<sub>D</sub><sup>20</sup> = -25.8 (c = 1.6, CH<sub>2</sub>Cl<sub>2</sub>).

**HPLC analysis:** Daicel Chiralpak AD-3 column (95:5 hexane: 2-propanol, 1.0 mL/min, 25 °C, 254 nm); t<sub>R</sub> (minor) = 13.13 min, t<sub>R</sub> (major) = 15.35 min, 99% ee.

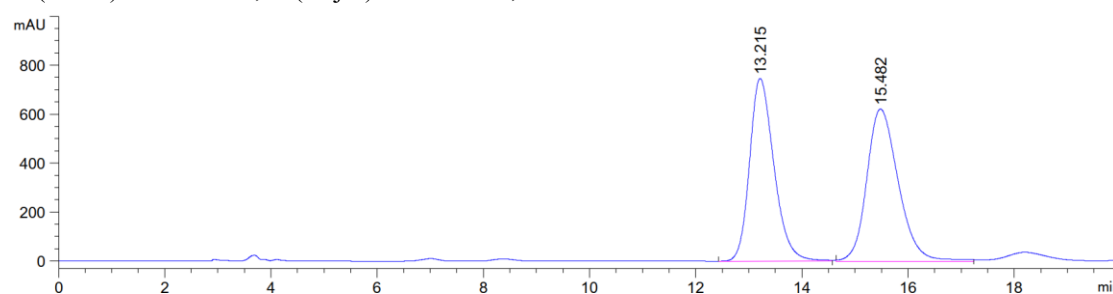

| Peak | Pet Time | Type | Width(min) | Area(mAU*S) | Hight(mAU) | Area%   |
|------|----------|------|------------|-------------|------------|---------|
| 1    | 13.215   | MM   | 0.4890     | 2.38458e4   | 745.89032  | 48.1684 |
| 2    | 15.482   | MM   | 0.6877     | 2.56593e4   | 621.87701  | 51.8316 |

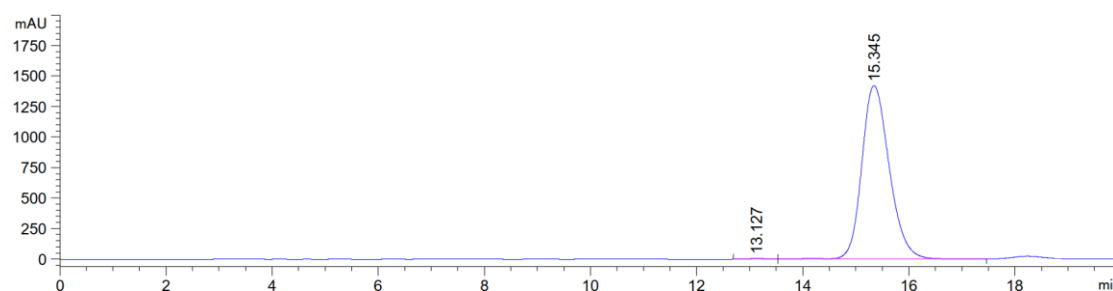

| Peak | Pet Time | Type | Width(min) | Area(mAU*S) | Hight(mAU) | Area%   |
|------|----------|------|------------|-------------|------------|---------|
| 1    | 13.127   | MM   | 0.3574     | 86.04757    | 3.81119    | 0.1683  |
| 2    | 15.345   | MM   | 0.5556     | 5.10477e4   | 1420.08655 | 99.8317 |



**(R)-3-formyl-2-(naphthalen-1-yl)-N-(phenylcarbamothioyl)benzamide (3wa)**

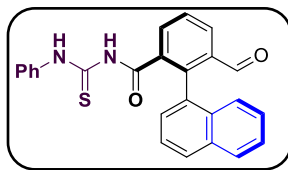

The title compound **3wa** was prepared under the optimized conditions A and purified by preparative TLC (hexane: ethyl acetate = 10:3). **3wa** was obtained as a yellow oil (25.8 mg, 63%). **<sup>1</sup>H NMR (500 MHz, Chloroform-*d*)**  $\delta$  11.88 (s, 1H), 9.49 (d,  $J = 0.9$  Hz, 1H), 8.40 (s, 1H), 8.31 (dd,  $J = 7.8, 1.4$  Hz, 1H), 8.16 (dd,  $J = 7.7, 1.5$  Hz, 1H), 8.04 (d,  $J = 8.3$  Hz, 1H), 8.00 (d,  $J = 8.3$  Hz, 1H), 7.78 (td,  $J = 7.8, 0.9$  Hz, 1H), 7.65 (dd,  $J = 8.3, 7.0$  Hz, 1H), 7.59 – 7.56 (m, 1H), 7.53 – 7.50 (m, 2H), 7.47 – 7.45 (m, 2H), 7.38 (d,  $J = 8.4$  Hz, 1H), 7.31 – 7.28 (m, 2H), 7.20 – 7.17 (m, 1H). **<sup>13</sup>C NMR (150 MHz, Chloroform-*d*)**  $\delta$  190.88, 177.29, 167.25, 141.93, 137.45, 135.92, 135.22, 134.24, 133.93, 132.62, 131.22, 131.17, 130.54, 129.25, 129.23, 128.90, 128.57, 128.16, 127.18, 126.92, 125.63, 124.91, 123.99.

**HRMS (ESI-TOF) (m/z):** Calcd for C<sub>25</sub>H<sub>19</sub>N<sub>2</sub>NaO<sub>2</sub>S, ([M + H]<sup>+</sup>), 411.1162; found 411.1166.

**[ $\alpha$ ]<sub>D</sub><sup>20</sup>** = -35.8 (c = 1.3, CH<sub>2</sub>Cl<sub>2</sub>).

**HPLC analysis:** Daicel Chiralpak OD-3 column (95:5 hexane: 2-propanol, 1.0 mL/min, 25 °C, 254 nm);

$t_R$  (major) = 22.79 min,  $t_R$  (minor) = 30.94 min, 87% ee.

mV

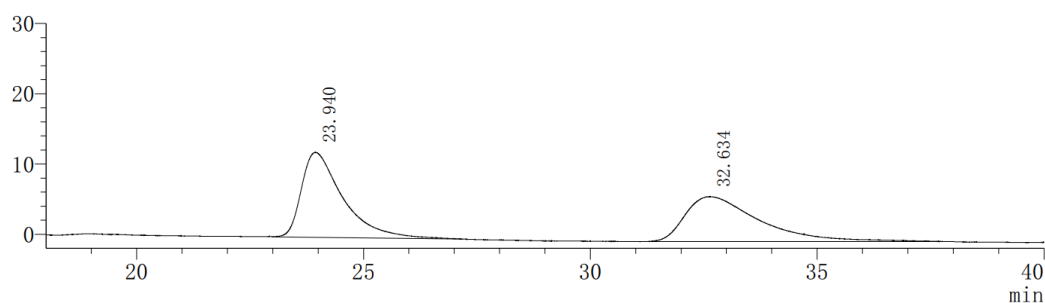

| Peak | Pet Time | Type | Width(min) | Area   | Hight | Area%   |
|------|----------|------|------------|--------|-------|---------|
| 1    | 23.940   | M    | 1.5878     | 768796 | 12086 | 51.3949 |
| 2    | 32.634   | M    | 3.0195     | 727064 | 6402  | 48.6051 |

mV

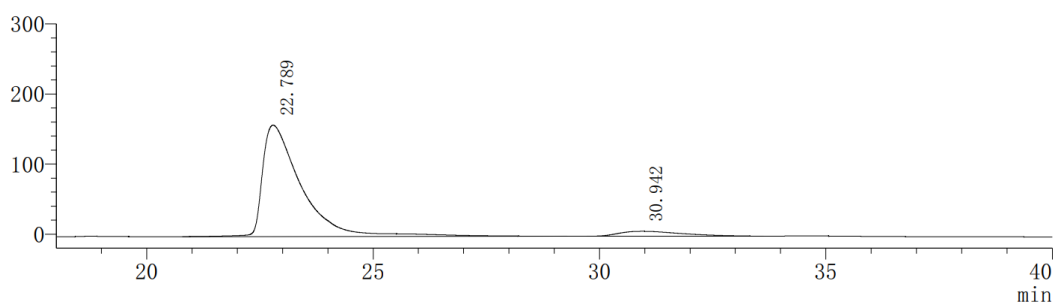

| Peak | Pet Time | Type | Width(min) | Area    | Hight  | Area%   |
|------|----------|------|------------|---------|--------|---------|
| 1    | 22.789   | M    | 1.4288     | 9515843 | 158969 | 93.3491 |
| 2    | 30.942   | M    | 2.4342     | 677982  | 6984   | 6.6509  |

**(R)-4-fluoro-6-formyl-N-(phenylcarbamothioyl)-[1,1':2',1''-terphenyl]-2-carboxamide (3xa)**

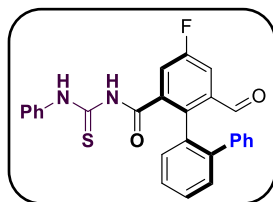

The title compound **3xa** was prepared under the optimized conditions A and purified by preparative TLC (hexane: ethyl acetate = 10:3). **3xa** was obtained as a yellow oil (19.5 mg, 43%). <sup>1</sup>H NMR (500 MHz, Chloroform-*d*) δ 11.96 (s, 1H), 9.81 (d, *J* = 3.0 Hz, 1H), 8.26 (s, 1H), 7.81 (dd, *J* = 8.0, 2.8 Hz, 1H), 7.66 – 7.56 (m, 6H), 7.41 – 7.38 (m, 3H), 7.29 – 7.20 (m, 4H), 7.06 – 7.04 (m, 2H). <sup>13</sup>C NMR (150 MHz, Chloroform-*d*) δ 189.68, 177.45, 165.63 (d, *J* = 2.0 Hz), 161.88 (d, *J* = 251.2 Hz), 142.32, 139.63 (d, *J* = 3.8 Hz), 139.28, 137.59 (d, *J* = 6.2 Hz), 137.55, 136.18 (d, *J* = 6.0 Hz), 131.55, 131.43, 131.27, 130.77, 129.54, 129.09, 128.74, 128.55, 127.93, 127.14, 124.07, 121.10 (d, *J* = 23.8 Hz), 117.91 (d, *J* = 21.8 Hz). <sup>19</sup>F NMR (565 MHz, CDCl<sub>3</sub>) δ -110.22 – -110.25 (m, 1F).

**HRMS** (ESI-TOF) (*m/z*): Calcd for C<sub>27</sub>H<sub>19</sub>FN<sub>2</sub>NaO<sub>2</sub>S, ([M + Na]<sup>+</sup>), 477.1043; found 477.1050.

[α]<sub>D</sub><sup>20</sup> = -138.9 (c = 1.0, CH<sub>2</sub>Cl<sub>2</sub>).

**HPLC analysis:** Daicel Chiralpak OD-H column (95:5 hexane: 2-propanol, 1.0 mL/min, 25 °C, 254 nm);

*t<sub>R</sub>* (major) = 14.14 min, *t<sub>R</sub>* (minor) = 19.96 min, 99% ee.

mV

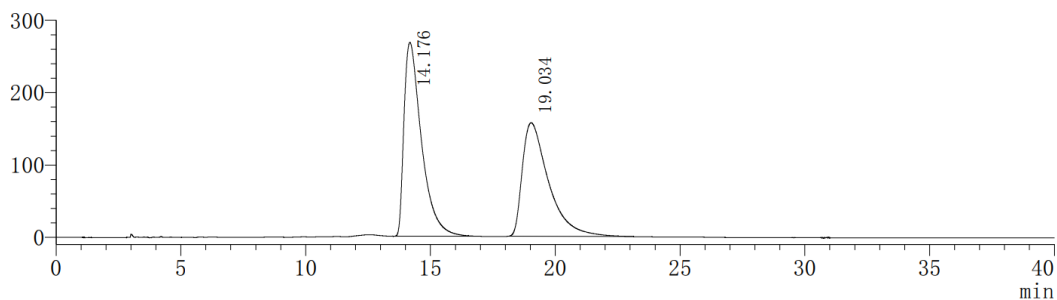

| Peak | Pet Time | Type | Width(min) | Area     | Hight  | Area%   |
|------|----------|------|------------|----------|--------|---------|
| 1    | 14.176   | M    | 1.2359     | 13096587 | 267900 | 53.1803 |
| 2    | 19.034   | M    | 1.8606     | 11530162 | 157003 | 46.8197 |

mV

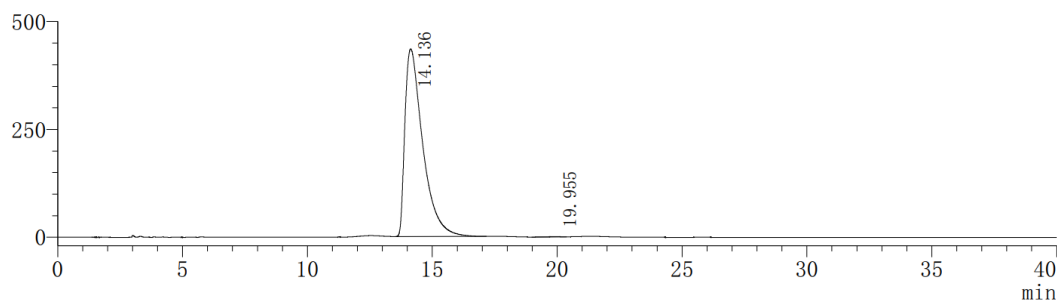

| Peak | Pet Time | Type | Width(min) | Area     | Hight  | Area%   |
|------|----------|------|------------|----------|--------|---------|
| 1    | 14.136   | M    | 1.2576     | 21600411 | 435060 | 99.9247 |
| 2    | 19.955   | M    | 1.2000     | 16275    | 355    | 0.0753  |

**(R)-4-chloro-6-formyl-N-(phenylcarbamothioyl)-[1,1':2',1''-terphenyl]-2-carboxamide (3ya)**

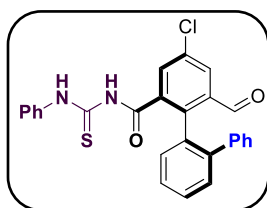

The title compound **3ya** was prepared under the optimized conditions A and purified by preparative TLC (hexane: ethyl acetate = 10:3). **3ya** was obtained as a yellow oil (21.6 mg, 46%). <sup>1</sup>H NMR (500 MHz, Chloroform-*d*) δ 11.94 (s, 1H), 9.81 (s, 1H), 8.26 (s, 1H), 8.08 (d, *J* = 2.4 Hz, 1H), 7.80 (d, *J* = 2.4 Hz, 1H), 7.65 – 7.55 (m, 5H), 7.41 – 7.35 (m, 3H), 7.29 – 7.21 (m, 4H), 7.07 – 7.05j (m, 2H). <sup>13</sup>C NMR (150 MHz, Chloroform-*d*) δ 189.63, 177.49, 165.78, 142.13, 141.93, 139.22, 137.53, 136.77, 135.81, 135.18, 133.29, 131.40, 131.37, 131.22, 131.20, 130.76, 129.55, 129.10, 128.80, 128.49, 128.00, 127.16, 124.10.

**HRMS** (ESI-TOF) (*m/z*): Calcd for C<sub>27</sub>H<sub>19</sub>ClN<sub>2</sub>NaO<sub>2</sub>S, ([M + Na]<sup>+</sup>), 493.0748; found 493.0751.

[α]<sub>D</sub><sup>20</sup> = -121.9 (c = 1.2, CH<sub>2</sub>Cl<sub>2</sub>).

**HPLC analysis:** Daicel Chiralpak OD-H column (95:5 hexane: 2-propanol, 1.0 mL/min, 25 °C, 254 nm);

*t<sub>R</sub>* (major) = 12.58 min, *t<sub>R</sub>* (minor) = 18.38 min, 99% ee.

mV

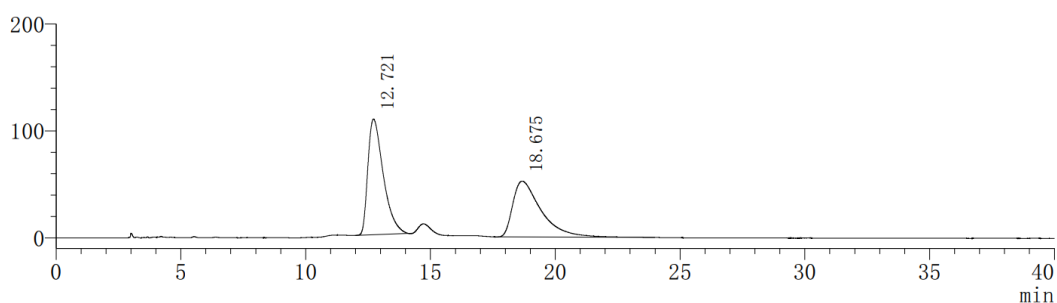

| Peak | Pet Time | Type | Width(min) | Area    | Hight  | Area%   |
|------|----------|------|------------|---------|--------|---------|
| 1    | 12.721   | M    | 1.1223     | 4661971 | 108242 | 52.9519 |
| 2    | 18.675   | M    | 2.0148     | 4142197 | 52255  | 47.0481 |

mV

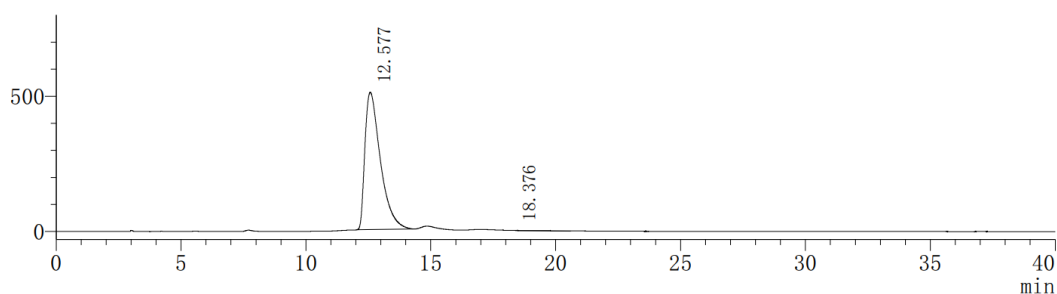

| Peak | Pet Time | Type | Width(min) | Area     | Hight  | Area%   |
|------|----------|------|------------|----------|--------|---------|
| 1    | 12.577   | M    | 1.1100     | 21883409 | 507776 | 99.5263 |
| 2    | 18.376   | M    | 3.9558     | 104161   | 631    | 0.4737  |

**(R)-6-formyl-4-methoxy-N-(phenylcarbamothioyl)-[1,1':2',1''-terphenyl]-2-carboxamide (3za)**

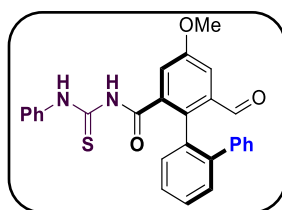

The title compound **3za** was prepared under the optimized conditions A and purified by preparative TLC (hexane: ethyl acetate = 10:3). **3za** was obtained as a yellow oil (30.8 mg, 66%). <sup>1</sup>H NMR (500 MHz, Chloroform-*d*) δ 12.03 (s, 1H), 9.83 (s, 1H), 8.28 (s, 1H), 7.63 – 7.52 (m, 6H), 7.41 – 7.35 (m, 4H), 7.28 – 7.20 (m, 4H), 7.08 – 7.06 (m, 2H), 3.90 (s, 3H). <sup>13</sup>C NMR (150 MHz, Chloroform-*d*) δ 190.97, 177.75, 166.90, 159.21, 142.33, 139.68, 137.65, 136.74, 136.17, 135.46, 132.07, 131.90, 131.16, 130.20, 129.58, 129.04, 128.62, 128.25, 127.70, 127.02, 124.09, 120.64, 114.54, 56.07..

**HRMS** (ESI-TOF) (m/z): Calcd for C<sub>28</sub>H<sub>22</sub>N<sub>2</sub>NaO<sub>3</sub>S, ([M + Na]<sup>+</sup>), 489.1243; found 489.1244.

[α]<sub>D</sub><sup>20</sup> = -87.7 (c = 1.5, CH<sub>2</sub>Cl<sub>2</sub>).

**HPLC analysis:** Daicel Chiralpak OD-H column (95:5 hexane: 2-propanol, 1.0 mL/min, 25 °C, 254 nm); t<sub>R</sub> (major) = 17.28 min, t<sub>R</sub> (minor) = 31.85 min, 99% ee.

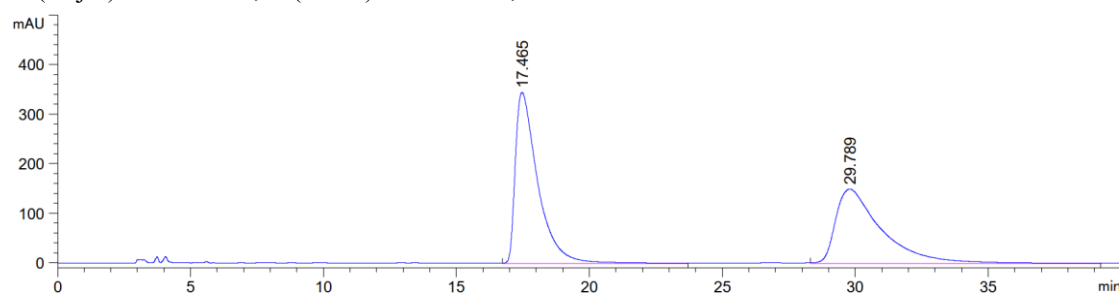

| Peak | Pet Time | Type | Width(min) | Area      | Hight     | Area%   |
|------|----------|------|------------|-----------|-----------|---------|
| 1    | 17.465   | MM R | 0.9873     | 2.04694e4 | 345.56125 | 52.7558 |
| 2    | 29.789   | MM R | 2.0340     | 1.83309e4 | 150.20439 | 47.2442 |

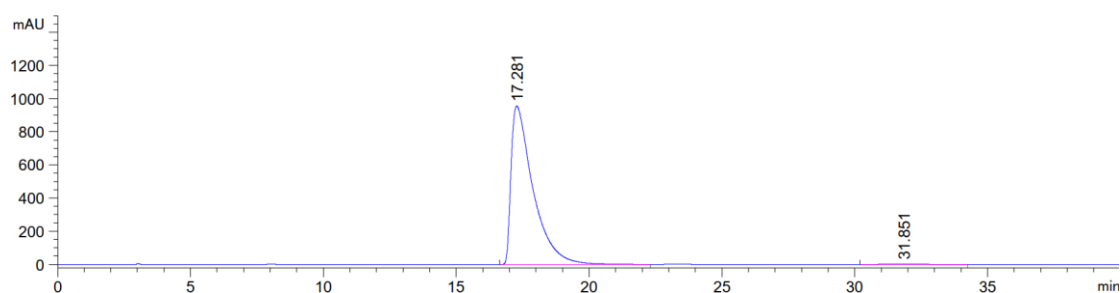

| Peak | Pet Time | Type | Width(min) | Area      | Hight     | Area%   |
|------|----------|------|------------|-----------|-----------|---------|
| 1    | 17.281   | BB   | 0.8597     | 5.50036e4 | 955.27869 | 99.3899 |
| 2    | 31.851   | BB   | 1.4116     | 337.64969 | 2.89088   | 0.6101  |

**(R)-6-formyl-N-(p-tolylcarbamothioyl)-[1,1':2',1''-terphenyl]-2-carboxamide (3ab)**

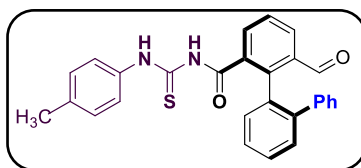

The title compound **3ab** was prepared under the optimized conditions A and purified by preparative TLC (hexane: ethyl acetate = 10:3). **3ab** was obtained as a yellow oil (19.8 mg, 44%). <sup>1</sup>H NMR (500 MHz, Chloroform-*d*) δ 11.93 (s, 1H), 9.87 (s, 1H), 8.22 (s, 1H), 8.13 (dd, *J* = 7.8, 1.4 Hz, 1H), 7.81 (dd, *J* = 7.7, 1.4 Hz, 1H), 7.64 – 7.60 (m, 1H), 7.59 – 7.54 (m, 3H), 7.49 – 7.47 (m, 2H), 7.38 (d, *J* = 7.7 Hz, 1H), 7.23 – 7.18 (m, 5H), 7.08 – 7.06 (m, 2H), 2.36 (s, 3H). <sup>13</sup>C NMR (150 MHz, Chloroform-*d*) δ 191.04, 177.92, 167.22, 143.96, 142.02, 139.53, 137.06, 135.58, 135.08, 134.39, 133.26, 132.33, 131.45, 131.43, 131.14, 130.37, 129.65, 129.59, 128.62, 128.50, 128.27, 127.81, 124.21, 21.29.

HRMS (ESI-TOF) (*m/z*): Calcd for C<sub>28</sub>H<sub>23</sub>N<sub>2</sub>O<sub>2</sub>S, ([M + Na]<sup>+</sup>), 451.1475; found 451.1479.

[α]<sub>D</sub><sup>20</sup> = -30.0 (*c* = 1.0, CH<sub>2</sub>Cl<sub>2</sub>).

HPLC analysis: Daicel Chiralpak OD-3 column (90:10 hexane: 2-propanol, 1.0 mL/min, 25 °C, 254 nm); t<sub>R</sub> (major) = 10.02 min, t<sub>R</sub> (minor) = 16.01 min, 95% ee.

mV

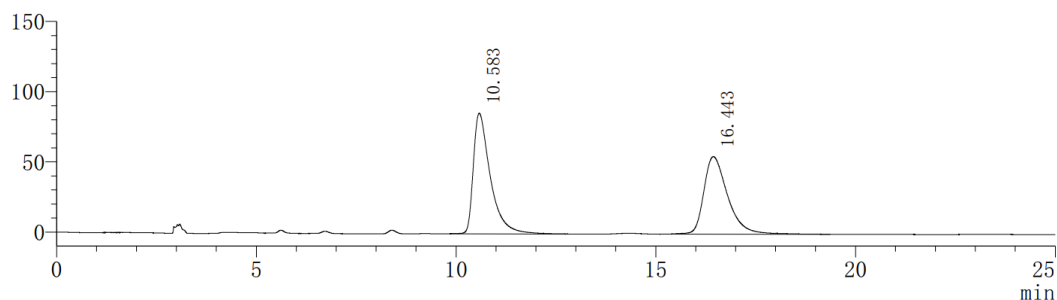

| Peak | Pet Time | Type | Width(min) | Area    | Hight | Area%   |
|------|----------|------|------------|---------|-------|---------|
| 1    | 10.583   | M    | 0.7406     | 2554940 | 85925 | 52.5428 |
| 2    | 16.443   | M    | 1.0529     | 2307644 | 55304 | 47.4572 |

mV

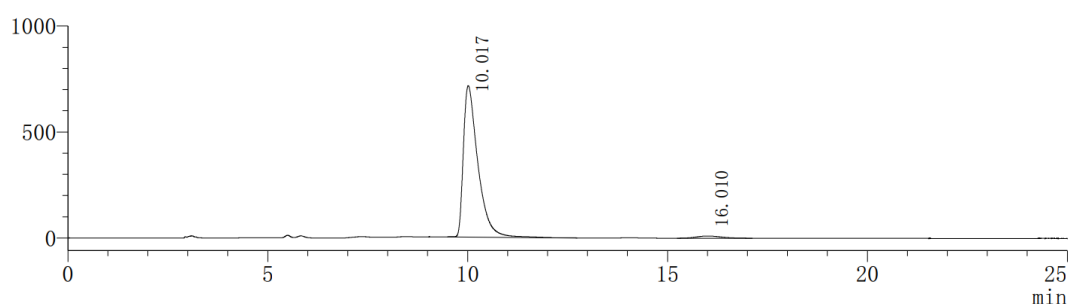

| Peak | Pet Time | Type | Width(min) | Area     | Hight  | Area%   |
|------|----------|------|------------|----------|--------|---------|
| 1    | 10.017   | M    | 0.6340     | 18008463 | 713853 | 97.4931 |
| 2    | 16.010   | M    | 1.1254     | 463066   | 10718  | 2.5069  |

**(R)-N-((4-fluorophenyl)carbamothioyl)-6-formyl-[1,1':2',1''-terphenyl]-2-carboxamide (3ac)**

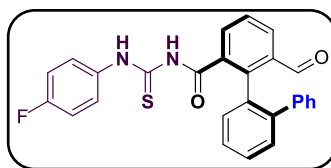

The title compound **3ac** was prepared under the optimized conditions A and purified by preparative TLC (hexane: ethyl acetate = 10:3). **3ac** was obtained as a yellow oil (20.4 mg, 45%). <sup>1</sup>H NMR (500 MHz, Chloroform-*d*) δ 11.97 (s, 1H), 9.87 (s, 1H), 8.26 (s, 1H), 8.14 (dd, *J* = 7.8, 1.4 Hz, 1H), 7.82 (dd, *J* = 7.7, 1.4 Hz, 1H), 7.64 – 7.61 (m, 1H), 7.59 – 7.55 (m, 5H), 7.39 (dd, *J* = 7.5, 1.3 Hz, 1H), 7.23 – 7.18 (m, 3H), 7.10 – 7.05 (m, 4H). <sup>13</sup>C NMR (150 MHz, Chloroform-*d*) δ 190.96, 178.36, 167.33, 161.13 (d, *J* = 245.5 Hz), 143.93, 142.01, 139.50, 135.60, 134.19, 133.62 (d, *J* = 3.1 Hz), 133.31, 132.29, 131.57, 131.41, 131.17, 130.42, 129.56, 128.62, 128.5, 128.30, 127.83, 126.24 (d, *J* = 8.2 Hz), 115.94 (d, *J* = 22.8 Hz). <sup>19</sup>F NMR (565 MHz, Chloroform-*d*) δ -114.19 – -114.23 (m, 1F).

**HRMS** (ESI-TOF) (*m/z*): Calcd for C<sub>27</sub>H<sub>19</sub>FN<sub>2</sub>NaO<sub>2</sub>S, ([M + Na]<sup>+</sup>), 477.1043; found 477.1088.

[α]<sub>D</sub><sup>20</sup> = -32.7 (c = 1.0, CH<sub>2</sub>Cl<sub>2</sub>).

**HPLC analysis:** Daicel Chiralpak OD-3 column (90:10 hexane: 2-propanol, 1.0 mL/min, 25 °C, 254 nm); t<sub>R</sub> (major) = 10.00 min, t<sub>R</sub> (minor) = 16.68 min, 97% ee.

mV

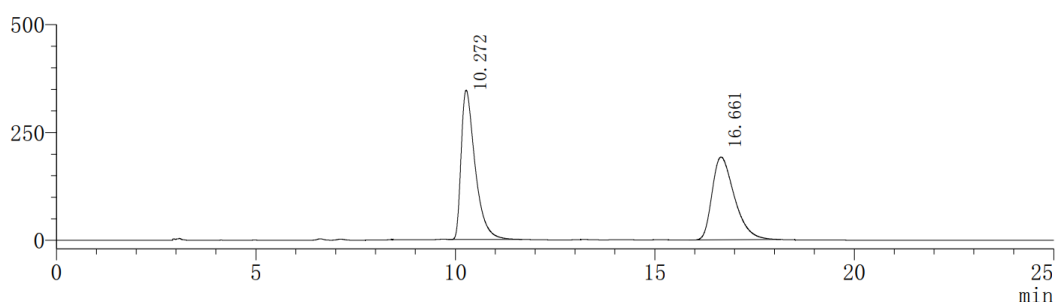

| Peak | Pet Time | Type | Width(min) | Area    | Hight  | Area%   |
|------|----------|------|------------|---------|--------|---------|
| 1    | 10.272   | M    | 0.6170     | 8418989 | 346269 | 52.8922 |
| 2    | 16.661   | M    | 1.0203     | 7498271 | 192188 | 47.1078 |

mV

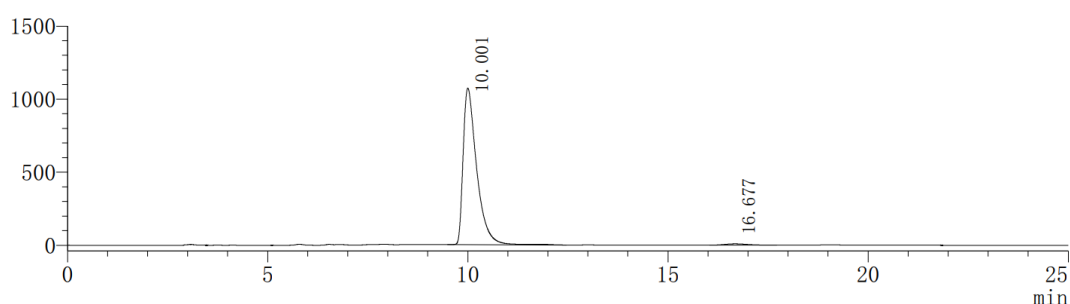

| Peak | Pet Time | Type | Width(min) | Area     | Hight   | Area%   |
|------|----------|------|------------|----------|---------|---------|
| 1    | 10.001   | M    | 0.5926     | 25322382 | 1070888 | 98.5111 |
| 2    | 16.677   | M    | 1.0781     | 382731   | 9367    | 1.4889  |

ethyl (*R*)-4-(3-(6-formyl-[1,1':2',1''-terphenyl]-2-carbonyl)thioureido)benzoate (**3ad**)

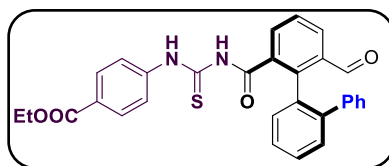

The title compound **3ad** was prepared under the optimized conditions A and purified by preparative TLC (hexane: ethyl acetate = 2:1). **3ad** was obtained as a yellow oil (33.5 mg, 66%). <sup>1</sup>H NMR (500 MHz, Chloroform-*d*) δ 12.30 (s, 1H), 9.86 (s, 1H), 8.31 (s, 1H), 8.14 (dd, *J* = 8.1, 1.5 Hz, 1H), 8.07 – 8.06 (m, 2H), 7.84 – 7.79 (m, 3H), 7.64 – 7.61 (m, 1H), 7.59 – 7.54 (m, 3H), 7.39 (dd, *J* = 7.5, 1.3 Hz, 1H), 7.23 – 7.17 (m, 3H), 7.06 – 7.04 (m, 2H), 4.38 (q, *J* = 7.2 Hz, 2H), 1.39 (t, *J* = 7.1 Hz, 3H). <sup>13</sup>C NMR (150 MHz, Chloroform-*d*) δ 190.88, 177.45, 167.32, 165.93, 143.83, 142.02, 141.55, 139.44, 135.59, 134.06, 133.43, 132.19, 131.62, 131.38, 131.22, 130.53, 130.51, 130.46, 129.54, 128.60, 128.54, 128.34, 127.83, 122.96, 61.23, 14.49.

HRMS (ESI-TOF) (*m/z*): Calcd for C<sub>30</sub>H<sub>24</sub>N<sub>2</sub>NaO<sub>4</sub>S, ([M + Na]<sup>+</sup>), 531.1349; found 531.1389.

[α]<sub>D</sub><sup>20</sup> = -107.6 (*c* = 1.7, CH<sub>2</sub>Cl<sub>2</sub>).

HPLC analysis: Daicel Chiralpak OD-3 column (90:10 hexane: 2-propanol, 1.0 mL/min, 25 °C, 254 nm); *t*<sub>R</sub> (major) = 14.69 min, *t*<sub>R</sub> (minor) = 24.47 min, 98% ee.

mV

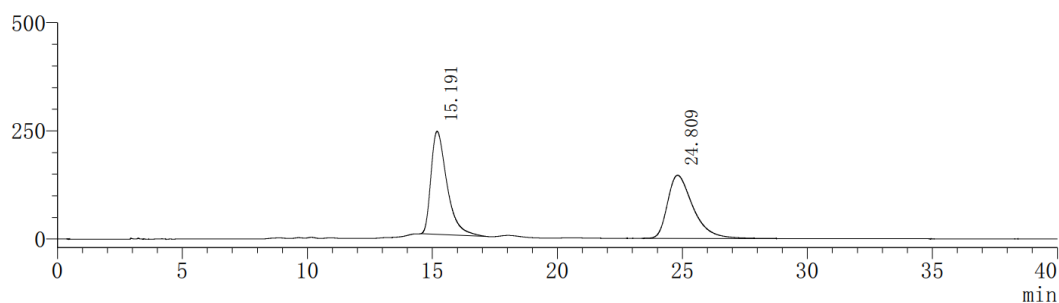

| Peak | Pet Time | Type | Width(min) | Area     | Hight  | Area%   |
|------|----------|------|------------|----------|--------|---------|
| 1    | 15.191   | M    | 1.1456     | 10600168 | 238147 | 50.6636 |
| 2    | 24.809   | M    | 1.8173     | 10322503 | 145809 | 49.3364 |

mV

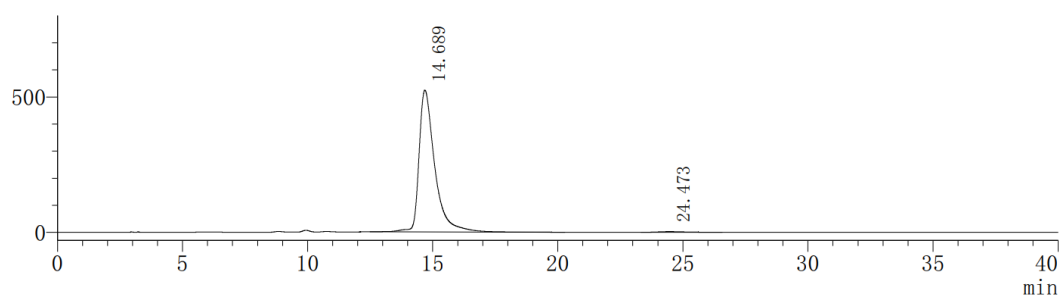

| Peak | Pet Time | Type | Width(min) | Area     | Hight  | Area%   |
|------|----------|------|------------|----------|--------|---------|
| 1    | 14.689   | M    | 1.0575     | 22965154 | 523791 | 99.1622 |
| 2    | 24.473   | M    | 1.7893     | 194035   | 2628   | 0.8378  |

**(R)-6-formyl-N-((4-(trifluoromethoxy)phenyl)carbamothioyl)-[1,1':2',1''-terphenyl]-2-carboxamide (3ae)**

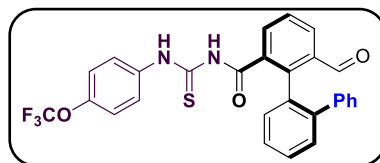

The title compound **3ae** was prepared under the optimized conditions A and purified by preparative TLC (hexane: ethyl acetate = 2:1). **3ae** was obtained as a white solid (32.2 mg, 62%). <sup>1</sup>H NMR (500 MHz, Chloroform-*d*) δ 12.12 (s, 1H), 9.87 (s, 1H), 8.29 (s, 1H), 8.14 (dd, *J* = 7.8, 1.4 Hz, 1H), 7.82 (dd, *J* = 7.7, 1.4 Hz, 1H), 7.71 – 7.69 (m, 2H), 7.63 (td, *J* = 7.5, 1.4 Hz, 1H), 7.59 – 7.54 (m, 3H), 7.39 (dd, *J* = 7.5, 1.4 Hz, 1H), 7.26 – 7.18 (m, 5H), 7.06 – 7.05 (m, 2H). <sup>13</sup>C NMR (150 MHz, Chloroform-*d*) δ 190.90, 177.99, 167.36, 147.32, 143.86, 142.02, 139.47, 136.15, 135.62, 134.09, 133.39, 132.23, 131.63, 131.40, 131.21, 130.46, 129.54, 128.61, 128.55, 128.33, 127.84, 125.36, 121.53, 120.59 (q, *J* = 255.9 Hz). <sup>19</sup>F NMR (565 MHz, Chloroform-*d*) δ -57.95 (s, 1CF<sub>3</sub>).

**HRMS** (ESI-TOF) (*m/z*): Calcd for C<sub>28</sub>H<sub>19</sub>F<sub>3</sub>N<sub>2</sub>NaO<sub>3</sub>S, ([M + Na]<sup>+</sup>), 543.0961; found 543.0944.

[α]<sub>D</sub><sup>20</sup> = -108.1 (c = 1.6, CH<sub>2</sub>Cl<sub>2</sub>).

**HPLC analysis:** Daicel Chiralpak OD-3 column (90:10 hexane: 2-propanol, 1.0 mL/min, 25 °C, 254 nm); t<sub>R</sub> (major) = 9.53 min, t<sub>R</sub> (minor) = 15.13 min, 99% ee.

mV

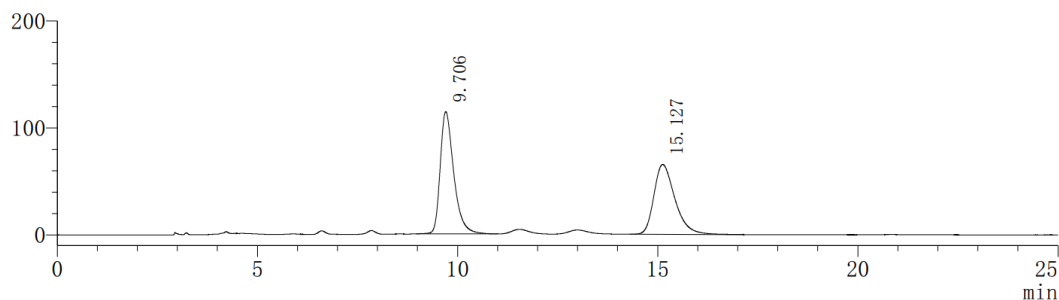

| Peak | Pet Time | Type | Width(min) | Area    | Hight  | Area%   |
|------|----------|------|------------|---------|--------|---------|
| 1    | 9.706    | M    | 0.5964     | 2695880 | 114280 | 53.0997 |
| 2    | 15.127   | M    | 0.9431     | 2381139 | 65262  | 46.9003 |

mV

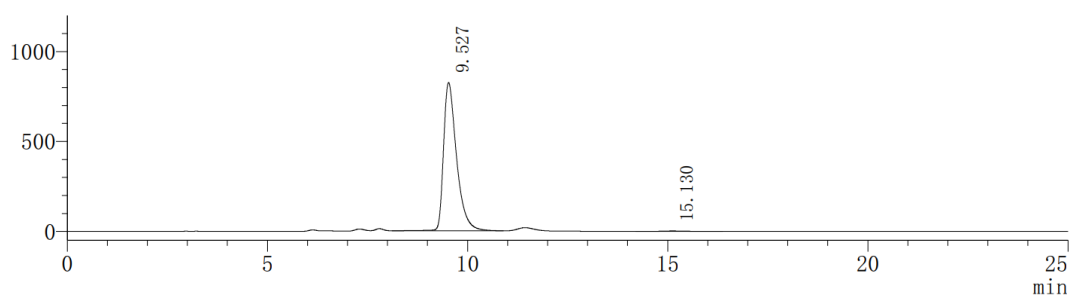

| Peak | Pet Time | Type | Width(min) | Area     | Hight  | Area%   |
|------|----------|------|------------|----------|--------|---------|
| 1    | 9.527    | M    | 0.5715     | 18644442 | 824229 | 99.5868 |
| 2    | 15.130   | M    | 0.8633     | 77357    | 2243   | 0.4132  |



**(R)-N-((3-fluorophenyl)carbamothioyl)-6-formyl-[1,1':2',1''-terphenyl]-2-carboxamide (3af)**

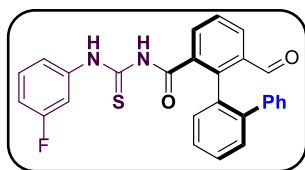

The title compound **3af** was prepared under the optimized conditions A and purified by preparative TLC (hexane: ethyl acetate = 10:3). **3af** was obtained as a light yellow oil (36.3 mg, 80%). **<sup>1</sup>H NMR (600 MHz, Chloroform-*d*)**  $\delta$  12.16 (s, 1H), 9.87 (s, 1H), 8.26 (s, 1H), 8.14 (d,  $J = 7.7$  Hz, 1H), 7.82 (d,  $J = 7.7$  Hz, 1H), 7.68 – 7.65 (m, 1H), 7.62 (t,  $J = 7.5$  Hz, 1H), 7.58 – 7.54 (m, 3H), 7.38 (d,  $J = 7.4$  Hz, 1H), 7.35 – 7.29 (m, 2H), 7.23 – 7.17 (m, 3H), 7.06 – 7.04 (m, 2H), 6.96 (td,  $J = 8.2, 2.4$  Hz, 1H). **<sup>13</sup>C NMR (150 MHz, Chloroform-*d*)**  $\delta$  190.79, 177.47, 167.16, 162.53 (d,  $J = 244.6$  Hz), 143.71, 141.84, 139.28, 138.91 (d,  $J = 10.4$  Hz), 135.42, 133.93, 133.23, 132.03, 131.45, 131.25, 131.04, 130.29, 130.00 (d,  $J = 9.1$  Hz), 129.39, 128.46, 128.38, 128.17, 127.68, 119.20 (d,  $J = 3.2$  Hz), 113.61 (d,  $J = 21.2$  Hz), 111.04 (d,  $J = 25.7$  Hz). **<sup>19</sup>F NMR (565 MHz, Chloroform-*d*)**  $\delta$  -110.95 – -110.99 (m, 1F).

**HRMS (ESI-TOF) (m/z):** Calcd for C<sub>27</sub>H<sub>19</sub>FN<sub>2</sub>NaO<sub>2</sub>S, ([M + Na]<sup>+</sup>), 477.1043; found 477.1041.

**[ $\alpha$ ]<sub>D</sub><sup>20</sup>** = -106.9 (c = 1.8, CH<sub>2</sub>Cl<sub>2</sub>).

**HPLC analysis:** Daicel Chiralpak OD-3 column (95:5 hexane: 2-propanol, 1.0 mL/min, 25 °C, 254 nm);

$t_R$  (major) = 13.38 min,  $t_R$  (minor) = 24.99 min, 99% ee.

mV

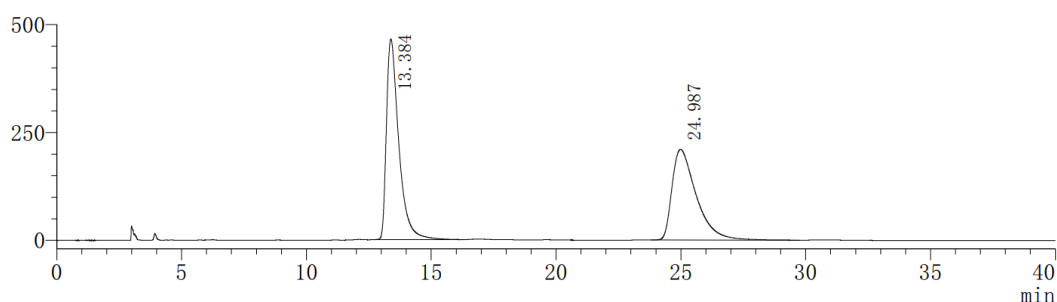

| Peak | Pet Time | Type | Width(min) | Area     | Hight  | Area%   |
|------|----------|------|------------|----------|--------|---------|
| 1    | 13.384   | M    | 0.8601     | 16034501 | 465231 | 53.1187 |
| 2    | 24.987   | M    | 1.7424     | 14151686 | 210107 | 46.8813 |

mV

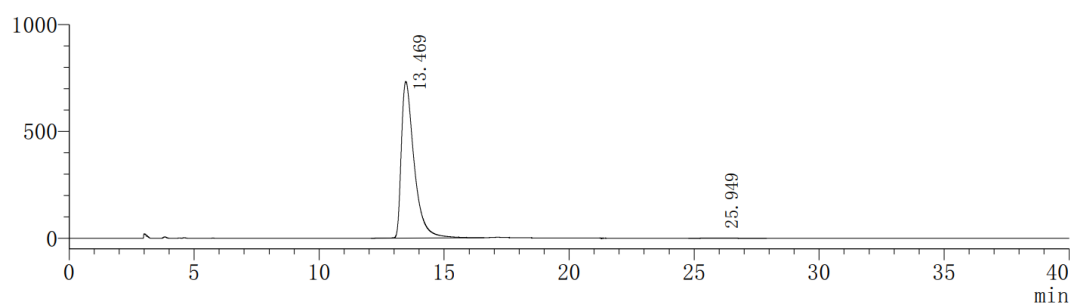

| Peak | Pet Time | Type | Width(min) | Area     | Hight  | Area%   |
|------|----------|------|------------|----------|--------|---------|
| 1    | 13.469   | M    | 0.8887     | 26150743 | 733605 | 99.5911 |
| 2    | 25.949   | M    | 1.4430     | 107357   | 1585   | 0.4089  |

**(R)-N-((3-chlorophenyl)carbamothioyl)-6-formyl-[1,1':2',1''-terphenyl]-2-carboxamide (3ag)**

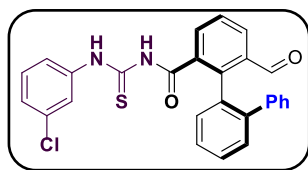

The title compound **3ag** was prepared under the optimized conditions A and purified by preparative TLC (hexane: ethyl acetate = 2:1). **3ag** was obtained as a yellow oil (23.5 mg, 50%). <sup>1</sup>H NMR (500 MHz, Chloroform-*d*) δ 12.11 (s, 1H), 9.87 (d, *J* = 0.8 Hz, 1H), 8.28 (s, 1H), 8.14 (dd, *J* = 7.8, 1.4 Hz, 1H), 7.81 (dd, *J* = 7.7, 1.4 Hz, 1H), 7.77 (t, *J* = 2.1 Hz, 1H), 7.63 (td, *J* = 7.5, 1.4 Hz, 1H), 7.59 – 7.54 (m, 3H), 7.51 – 7.49 (m, 1H), 7.38 (dd, *J* = 7.6, 1.3 Hz, 1H), 7.31 (t, *J* = 8.0 Hz, 1H), 7.24 – 7.18 (m, 4H), 7.06 – 7.04 (m, 2H). <sup>13</sup>C NMR (150 MHz, Chloroform-*d*) δ 190.95, 177.85, 167.34, 143.90, 141.98, 139.45, 138.73, 135.57, 134.59, 134.09, 133.36, 132.20, 131.60, 131.40, 131.19, 130.44, 129.99, 129.54, 128.61, 128.53, 128.31, 127.82, 127.04, 124.05, 122.11.

**HRMS** (ESI-TOF) (*m/z*): Calcd for C<sub>27</sub>H<sub>20</sub>ClN<sub>2</sub>O<sub>2</sub>S, ([M + Na]<sup>+</sup>), 471.0929; found 471.0944.

[α]<sub>D</sub><sup>20</sup> = -14.8 (*c* = 1.2, CH<sub>2</sub>Cl<sub>2</sub>).

**HPLC analysis:** Daicel Chiralpak OD-3 column (90:10 hexane: 2-propanol, 1.0 mL/min, 25 °C, 254 nm); *t*<sub>R</sub> (major) = 9.07 min, *t*<sub>R</sub> (minor) = 14.77 min, 99% ee.

mV

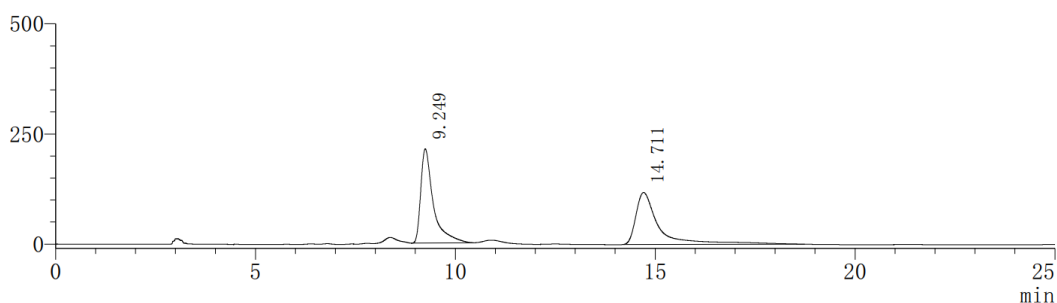

| Peak | Pet Time | Type | Width(min) | Area    | Hight  | Area%   |
|------|----------|------|------------|---------|--------|---------|
| 1    | 9.249    | M    | 0.5007     | 4696410 | 213954 | 49.5399 |
| 2    | 14.711   | M    | 0.8378     | 4783646 | 117950 | 50.4601 |

mV

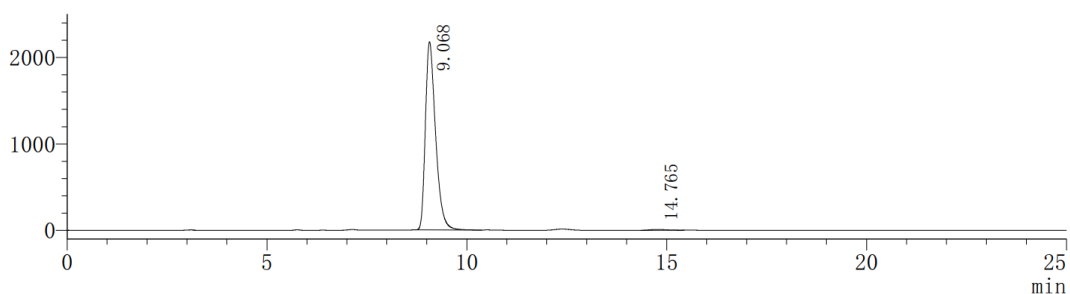

| Peak | Pet Time | Type | Width(min) | Area     | Hight   | Area%   |
|------|----------|------|------------|----------|---------|---------|
| 1    | 9.068    | M    | 0.4604     | 38555800 | 2173537 | 99.3083 |
| 2    | 14.765   | M    | 0.7406     | 268543   | 9925    | 0.6917  |

**(R)-N-((3-bromophenyl)carbamothioyl)-6-formyl-[1,1':2',1''-terphenyl]-2-carboxamide (3ah)**

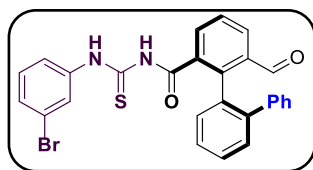

The title compound **3ah** was prepared under the optimized conditions A and purified by preparative TLC (hexane: ethyl acetate = 10:3). **3ah** was obtained as a white solid (34.4 mg, 67%). **<sup>1</sup>H NMR (500 MHz, Chloroform-*d*)**  $\delta$  12.10 (s, 1H), 9.86 (s, 1H), 8.29 (s, 1H), 8.14 (d, *J* = 7.8 Hz, 1H), 7.90 (s, 1H), 7.81 (d, *J* = 7.7 Hz, 1H), 7.64 – 7.54 (m, 5H), 7.38 (d, *J* = 7.6 Hz, 2H), 7.26 – 7.18 (m, 4H), 7.05 (d, *J* = 7.1 Hz, 2H). **<sup>13</sup>C NMR (150 MHz, Chloroform-*d*)**  $\delta$  190.95, 177.88, 167.46, 143.94, 141.97, 139.45, 138.78, 135.50, 134.06, 133.38, 132.23, 131.56, 131.38, 131.13, 130.39, 130.26, 129.98, 129.54, 128.61, 128.48, 128.28, 127.81, 126.93, 122.65, 122.40.

**HRMS (ESI-TOF) (m/z):** Calcd for C<sub>27</sub>H<sub>19</sub>BrN<sub>2</sub>NaO<sub>2</sub>S, ([M + Na]<sup>+</sup>), 537.0243; found 537.0236.

**[ $\alpha$ ]<sub>D</sub><sup>20</sup>** = -35.5 (c = 1.7, CH<sub>2</sub>Cl<sub>2</sub>).

**HPLC analysis:** Daicel Chiralpak OD-H column (95:5 hexane: 2-propanol, 1.0 mL/min, 25 °C, 254 nm);

*t<sub>R</sub>* (major) = 16.37 min, *t<sub>R</sub>* (minor) = 30.38 min, 99% ee.

mV

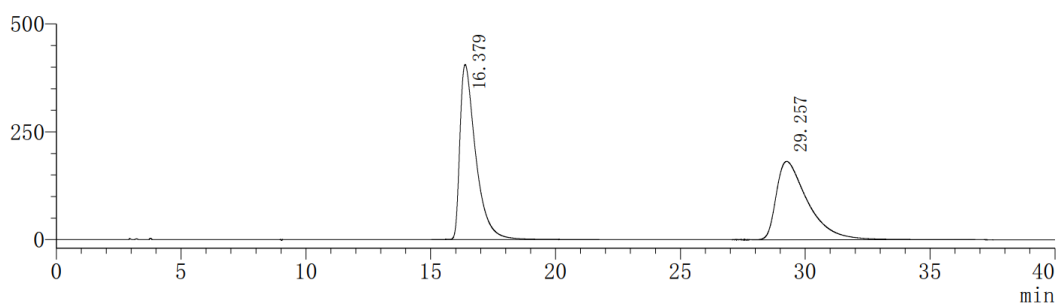

| Peak | Pet Time | Type | Width(min) | Area     | Hight  | Area%   |
|------|----------|------|------------|----------|--------|---------|
| 1    | 16.379   | M    | 1.1185     | 17938950 | 406188 | 52.9882 |
| 2    | 29.257   | M    | 2.2414     | 15915675 | 181607 | 47.0118 |

mV

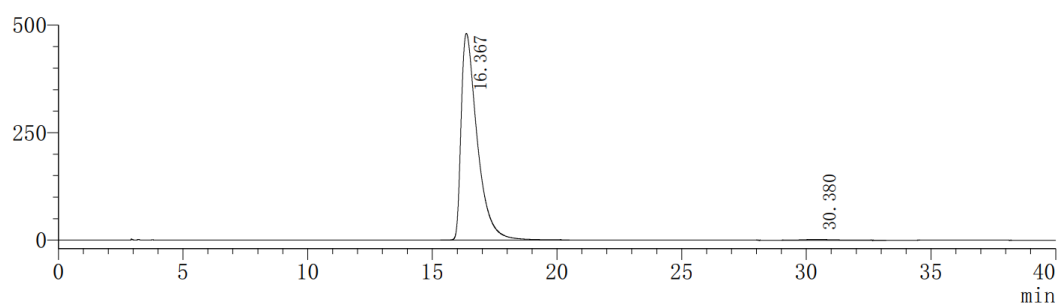

| Peak | Pet Time | Type | Width(min) | Area     | Hight  | Area%   |
|------|----------|------|------------|----------|--------|---------|
| 1    | 16.367   | M    | 1.1291     | 21555107 | 480854 | 99.2874 |
| 2    | 30.380   | M    | 1.9296     | 154712   | 1633   | 0.7126  |

**(R)-6-formyl-N-((3-(trifluoromethyl)phenyl)carbamothioyl)-[1,1':2',1''-terphenyl]-2-carboxamide (3ai)**

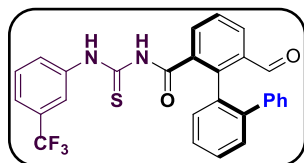

The title compound **3ai** was prepared under the optimized conditions A and purified by preparative TLC (hexane: ethyl acetate = 10:3). **3ai** was obtained as a white solid (33.8 mg, 67%). <sup>1</sup>H NMR (500 MHz, Chloroform-*d*) δ 12.22 (s, 1H), 9.87 (s, 1H), 8.31 (s, 1H), 8.15 (dd, *J* = 7.8, 1.5 Hz, 1H), 7.96 (s, 1H), 7.88 – 7.86 (m, 1H), 7.83 (dd, *J* = 7.7, 1.5 Hz, 1H), 7.65 – 7.62 (m, 1H), 7.60 – 7.55 (m, 3H), 7.52 – 7.51 (m, 2H), 7.39 (dd, *J* = 7.5, 1.4 Hz, 1H), 7.23 – 7.18 (m, 3H), 7.07 – 7.05 (m, 2H). <sup>13</sup>C NMR (150 MHz, Chloroform-*d*) δ 190.89, 178.08, 167.42, 143.88, 142.01, 139.46, 138.20, 135.61, 134.02, 133.41, 132.21, 131.66, 131.53 (q, *J* = 32.6 Hz), 131.38, 131.23, 130.48, 129.55, 129.54, 128.62, 128.56, 128.35, 127.85, 127.18, 123.81 (q, *J* = 270.7 Hz), 123.51 (q, *J* = 3.9 Hz), 120.86 (q, *J* = 4.0 Hz). <sup>19</sup>F NMR (565 MHz, Chloroform-*d*) δ -62.74 (s, 1CF<sub>3</sub>).

**HRMS** (ESI-TOF) (*m/z*): Calcd for C<sub>28</sub>H<sub>20</sub>F<sub>3</sub>N<sub>2</sub>O<sub>2</sub>S, ([M + Na]<sup>+</sup>), 505.1192; found 505.1206.

[α]<sub>D</sub><sup>20</sup> = -89.4 (c = 1.7, CH<sub>2</sub>Cl<sub>2</sub>).

**HPLC analysis:** Daicel Chiralpak OD-H column (95:5 hexane: 2-propanol, 1.0 mL/min, 25 °C, 254 nm);

*t<sub>R</sub>* (major) = 12.84 min, *t<sub>R</sub>* (minor) = 22.22 min, 99% ee.

mV

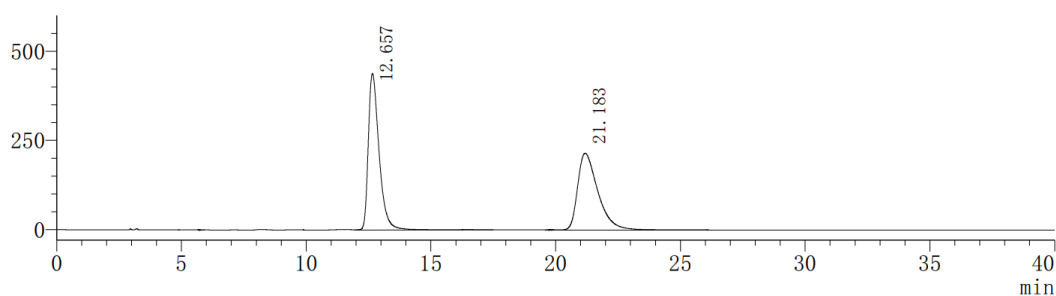

| Peak | Pet Time | Type | Width(min) | Area     | Hight  | Area%   |
|------|----------|------|------------|----------|--------|---------|
| 1    | 12.657   | M    | 0.7572     | 13252027 | 439482 | 52.1832 |
| 2    | 21.183   | M    | 1.4552     | 12143173 | 215242 | 47.8168 |

mV

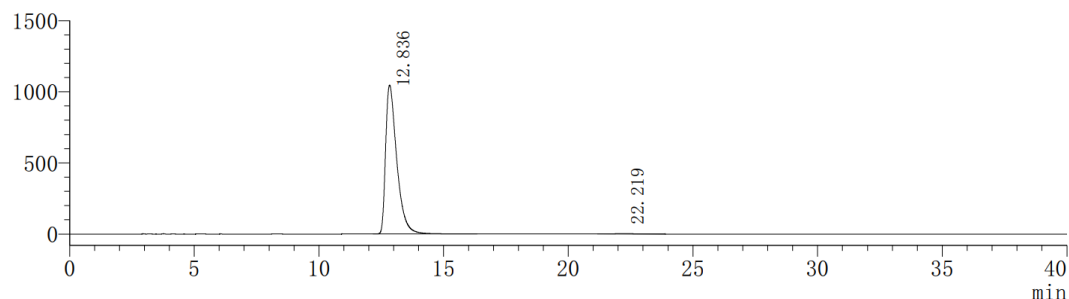

| Peak | Pet Time | Type | Width(min) | Area     | Hight   | Area%   |
|------|----------|------|------------|----------|---------|---------|
| 1    | 12.836   | M    | 0.7858     | 32526443 | 1046406 | 99.4622 |
| 2    | 22.219   | M    | 1.6746     | 175876   | 2876    | 0.5378  |

**(R)-6-formyl-N-(m-tolylcarbamothioyl)-[1,1':2',1''-terphenyl]-2-carboxamide (3aj)**

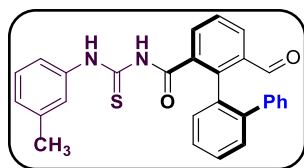

The title compound **3aj** was prepared under the optimized conditions A and purified by preparative TLC (hexane: ethyl acetate = 10:3). **3aj** was obtained as a yellow solid (32.9 mg, 73%). <sup>1</sup>H NMR (500 MHz, Chloroform-*d*) δ 12.00 (s, 1H), 9.86 (s, 1H), 8.28 (s, 1H), 8.12 (dd, *J* = 7.8, 1.4 Hz, 1H), 7.81 (dd, *J* = 7.7, 1.4 Hz, 1H), 7.61 (td, *J* = 7.5, 1.4 Hz, 1H), 7.58 – 7.53 (m, 3H), 7.46 (dd, *J* = 8.1, 2.1 Hz, 1H), 7.41 (s, 1H), 7.38 (dd, *J* = 7.5, 1.3 Hz, 1H), 7.27 (t, *J* = 7.8 Hz, 1H), 7.22 – 7.18 (m, 3H), 7.08 – 7.06 (m, 3H), 2.37 (s, 3H). <sup>13</sup>C NMR (150 MHz, Chloroform-*d*) δ 190.96, 177.66, 167.22, 143.88, 142.02, 139.52, 139.03, 137.53, 135.52, 134.36, 133.25, 132.32, 131.38, 131.36, 131.10, 130.31, 129.55, 128.83, 128.58, 128.46, 128.23, 127.82, 127.76, 124.60, 121.15, 21.54.

**HRMS** (ESI-TOF) (*m/z*): Calcd for C<sub>28</sub>H<sub>22</sub>N<sub>2</sub>NaO<sub>2</sub>S, ([M + Na]<sup>+</sup>), 473.1294; found 473.1296.

[α]<sub>D</sub><sup>20</sup> = -135.4 (c = 1.6, CH<sub>2</sub>Cl<sub>2</sub>).

**HPLC analysis:** Daicel Chiralpak OD-3 column (95:5 hexane: 2-propanol, 1.0 mL/min, 25 °C, 254 nm);

*t<sub>R</sub>* (major) = 12.96 min, *t<sub>R</sub>* (minor) = 21.17 min, 99% ee.

mV

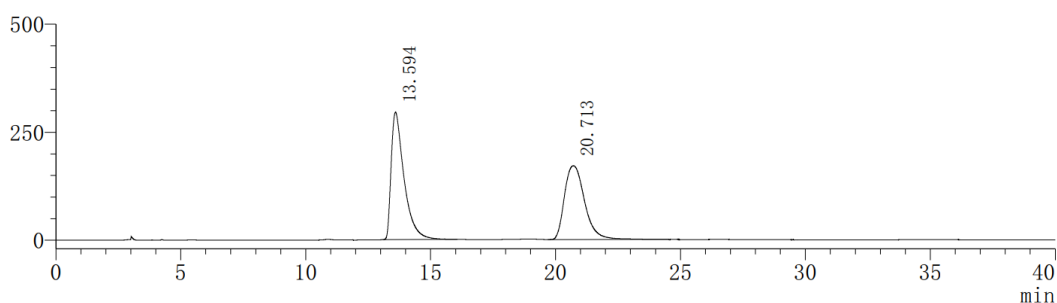

| Peak | Pet Time | Type | Width(min) | Area     | Hight  | Area%   |
|------|----------|------|------------|----------|--------|---------|
| 1    | 13.594   | M    | 0.9222     | 10607005 | 295017 | 52.3546 |
| 2    | 20.713   | M    | 1.3782     | 9652927  | 171073 | 47.6454 |

mV

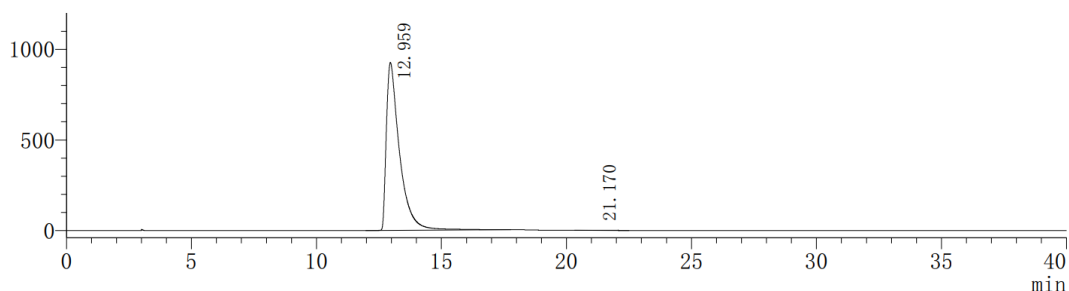

| Peak | Pet Time | Type | Width(min) | Area     | Hight  | Area%   |
|------|----------|------|------------|----------|--------|---------|
| 1    | 12.959   | M    | 0.9001     | 34177444 | 926084 | 99.8347 |
| 2    | 21.170   | M    | 1.5465     | 56590    | 891    | 0.1653  |

**(R)-6-formyl-N-(3-methoxyphenyl)carbamothioyl-[1,1':2',1''-terphenyl]-2-carboxamide (3ak)**

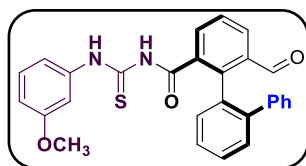

The title compound **3ak** was prepared under the optimized conditions A and purified by preparative TLC (hexane: ethyl acetate = 10:3). **3ak** was obtained as a light yellow oil (23.8 mg, 51%). **<sup>1</sup>H NMR (500 MHz, Chloroform-*d*)**  $\delta$  12.07 (s, 1H), 9.87 (d,  $J$  = 0.9 Hz, 1H), 8.19 (s, 1H), 8.14 (dd,  $J$  = 7.8, 1.5 Hz, 1H), 7.82 (dd,  $J$  = 7.7, 1.4 Hz, 1H), 7.64 – 7.61 (m, 1H), 7.59 – 7.54 (m, 3H), 7.42 – 7.38 (m, 2H), 7.29 (t,  $J$  = 8.2 Hz, 1H), 7.24 – 7.18 (m, 3H), 7.14 (dd,  $J$  = 8.0, 1.8 Hz, 1H), 7.07 – 7.05 (m, 2H), 6.82 – 6.80 (m, 1H), 3.82 (s, 3H). **<sup>13</sup>C NMR (150 MHz, Chloroform-*d*)**  $\delta$  190.99, 177.46, 167.20, 160.11, 143.89, 142.05, 139.51, 138.77, 135.63, 134.31, 133.34, 132.28, 131.52, 131.44, 131.21, 130.43, 129.75, 129.59, 128.63, 128.54, 128.32, 127.83, 116.12, 112.83, 109.54, 55.64.

**HRMS (ESI-TOF) (m/z):** Calcd for C<sub>28</sub>H<sub>22</sub>N<sub>2</sub>NaO<sub>3</sub>S, ([M + Na]<sup>+</sup>), 489.1243; found 489.1228.

**[ $\alpha$ ]<sub>D</sub><sup>20</sup>** = -68.3 (c = 1.2, CH<sub>2</sub>Cl<sub>2</sub>).

**HPLC analysis:** Daicel Chiralpak OD-H column (95:5 hexane: 2-propanol, 1.0 mL/min, 25 °C, 254 nm);

$t_R$  (major) = 21.36 min,  $t_R$  (minor) = 41.20 min, 97% ee.

mV

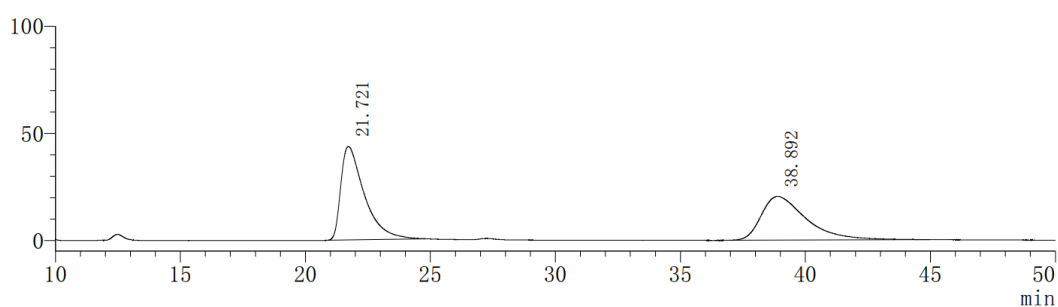

| Peak | Pet Time | Type | Width(min) | Area    | Hight | Area%   |
|------|----------|------|------------|---------|-------|---------|
| 1    | 21.721   | M    | 1.6724     | 2857627 | 43698 | 52.7018 |
| 2    | 38.892   | M    | 3.1575     | 2564627 | 20438 | 47.2982 |

mV

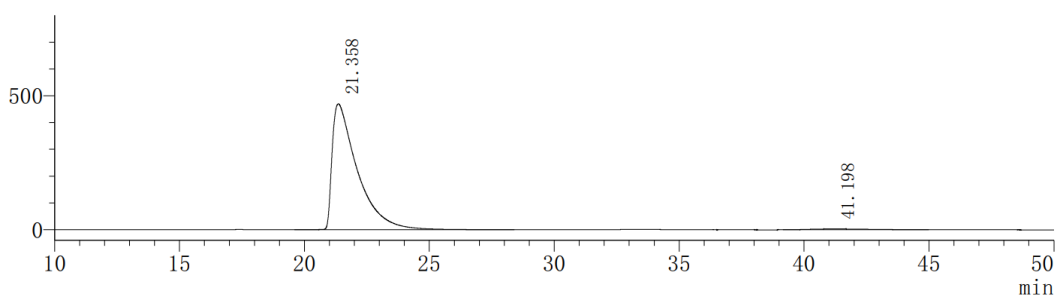

| Peak | Pet Time | Type | Width(min) | Area     | Hight  | Area%   |
|------|----------|------|------------|----------|--------|---------|
| 1    | 21.358   | M    | 1.7719     | 33130048 | 470191 | 98.4097 |
| 2    | 41.198   | M    | 3.9330     | 535388   | 3232   | 1.5903  |

**(R)-N-((2-fluorophenyl)carbamothioyl)-6-formyl-[1,1':2',1''-terphenyl]-2-carboxamide (3a)**

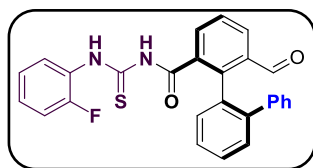

The title compound **3a** was prepared under the optimized conditions A and purified by preparative TLC (hexane: ethyl acetate = 10:3). **3a** was obtained as a yellow oil (29.5 mg, 65%). <sup>1</sup>H NMR (500 MHz, Chloroform-*d*) δ 12.03 (s, 1H), 9.91 (s, 1H), 8.27 (s, 1H), 8.18 – 8.15 (m, 2H), 7.83 (dd, *J* = 7.7, 1.5 Hz, 1H), 7.64 – 7.54 (m, 4H), 7.40 (d, *J* = 7.4 Hz, 1H), 7.27 – 7.14 (m, 6H), 7.06 – 7.05 (m, 2H). <sup>13</sup>C NMR (150 MHz, Chloroform-*d*) δ 191.04, 178.48, 167.10, 155.44 (d, *J* = 247.2 Hz), 143.82, 142.11, 139.43, 135.62, 134.10, 133.61, 132.17, 131.54 (d, *J* = 13.2 Hz), 131.26, 130.48, 129.59, 128.64, 128.50, 128.32, 128.13 (d, *J* = 7.8 Hz), 127.79, 126.06, 125.93 (d, *J* = 10.9 Hz), 124.19 (d, *J* = 3.6 Hz), 115.88 (d, *J* = 19.5 Hz). <sup>19</sup>F NMR (565 MHz, Chloroform-*d*) δ -124.11 – -124.15 (m, 1F).

HRMS (ESI-TOF) (*m/z*): Calcd for C<sub>27</sub>H<sub>20</sub>FN<sub>2</sub>O<sub>2</sub>S, ([M + H]<sup>+</sup>), 455.1224; found 455.1220.

[α]<sub>D</sub><sup>20</sup> = -95.2 (c = 1.5, CH<sub>2</sub>Cl<sub>2</sub>).

HPLC analysis: Daicel Chiralpak OD-H column (95:5 hexane: 2-propanol, 1.0 mL/min, 25 °C, 254 nm);

*t*<sub>R</sub> (major) = 15.45 min, *t*<sub>R</sub> (minor) = 28.22 min, 92% ee.

mV

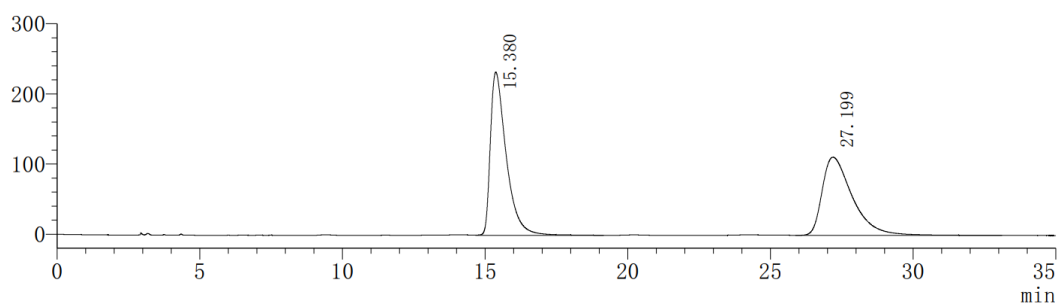

| Peak | Pet Time | Type | Width(min) | Area    | Hight  | Area%   |
|------|----------|------|------------|---------|--------|---------|
| 1    | 15.380   | M    | 0.9705     | 9013777 | 232632 | 52.2277 |
| 2    | 27.199   | M    | 1.8702     | 8244847 | 111586 | 47.7723 |

mV

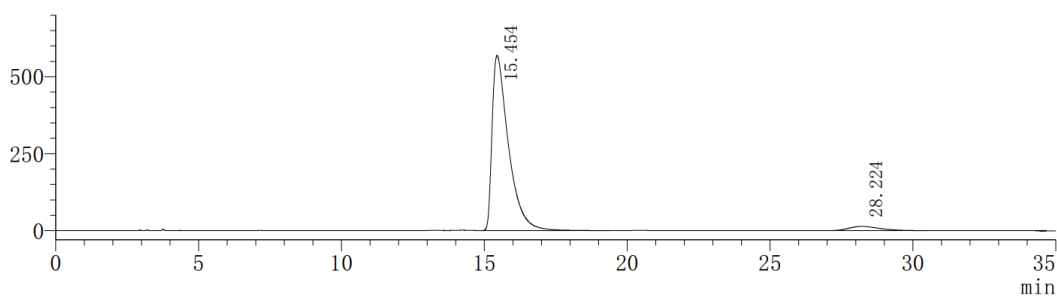

| Peak | Pet Time | Type | Width(min) | Area     | Hight  | Area%   |
|------|----------|------|------------|----------|--------|---------|
| 1    | 15.454   | M    | 1.0135     | 22762472 | 568843 | 95.7789 |
| 2    | 28.224   | M    | 1.9663     | 1003183  | 13459  | 4.2211  |

**(R)-6-formyl-N-((2-(trifluoromethoxy)phenyl)carbamothioyl)-[1,1':2',1''-terphenyl]-2-carboxamide (3am)**

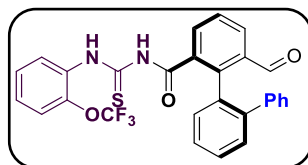

The title compound **3am** was prepared under the optimized conditions A and purified by preparative TLC (hexane: ethyl acetate = 10:3). **3am** was obtained as a light yellow oil (27.0 mg, 52%). <sup>1</sup>H NMR (500 MHz, Chloroform-*d*) δ 12.35 (s, 1H), 9.93 (s, 1H), 8.48 (dd, *J* = 8.1, 1.8 Hz, 1H), 8.26 (s, 1H), 8.15 (dd, *J* = 7.8, 1.5 Hz, 1H), 7.84 (dd, *J* = 7.8, 1.4 Hz, 1H), 7.63 – 7.60 (m, 1H), 7.58 – 7.53 (m, 3H), 7.40 (dd, *J* = 7.5, 1.5 Hz, 1H), 7.36 – 7.32 (m, 2H), 7.30 – 7.26 (m, 1H), 7.22 – 7.16 (m, 3H), 7.05 – 7.03 (m, 2H). <sup>13</sup>C NMR (150 MHz, Chloroform-*d*) δ 191.06, 178.08, 167.10, 143.91, 142.08, 141.40, 139.52, 135.57, 134.17, 133.57, 132.21, 131.48, 131.34, 131.20, 130.76, 130.39, 129.50, 128.60, 128.49, 128.27, 127.72, 127.41, 127.01, 125.65, 121.20, 120.6 (q, *J* = 257.9 Hz). <sup>19</sup>F NMR (565 MHz, Chloroform-*d*) δ -57.75 (s, 1OCF<sub>3</sub>).

**HRMS** (ESI-TOF) (*m/z*): Calcd for C<sub>28</sub>H<sub>20</sub>F<sub>3</sub>N<sub>2</sub>O<sub>3</sub>S, ([M + Na]<sup>+</sup>), 521.1141; found 521.1133.

[α]<sub>D</sub><sup>20</sup> = -84.0 (c = 1.4, CH<sub>2</sub>Cl<sub>2</sub>).

**HPLC analysis:** Daicel Chiralpak OD-3 column (95:5 hexane: 2-propanol, 1.0 mL/min, 25 °C, 254 nm);

*t<sub>R</sub>* (major) = 9.69 min, *t<sub>R</sub>* (minor) = 16.38 min, 95% ee.

mV

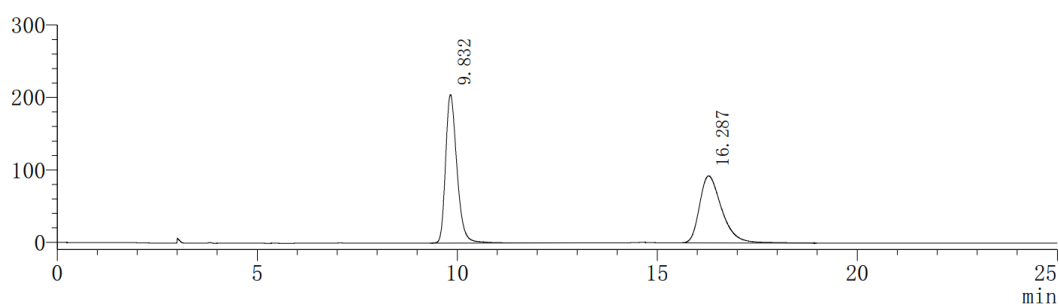

| Peak | Pet Time | Type | Width(min) | Area    | Hight  | Area%   |
|------|----------|------|------------|---------|--------|---------|
| 1    | 9.832    | M    | 0.5053     | 4043025 | 204779 | 53.0842 |
| 2    | 16.287   | M    | 0.9953     | 3573225 | 92472  | 46.9158 |

mV

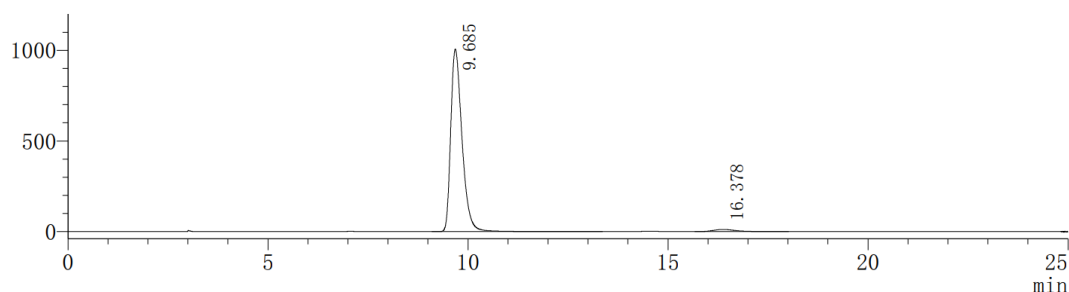

| Peak | Pet Time | Type | Width(min) | Area     | Hight   | Area%   |
|------|----------|------|------------|----------|---------|---------|
| 1    | 9.685    | M    | 0.5037     | 19752877 | 1006264 | 97.7101 |
| 2    | 16.378   | M    | 0.9943     | 462928   | 11777   | 2.2899  |



**(R)-6-formyl-N-(o-tolylcarbamothioyl)-[1,1':2',1''-terphenyl]-2-carboxamide (3an)**

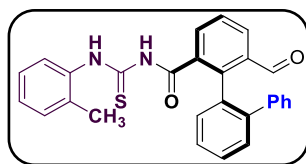

The title compound **3an** was prepared under the optimized conditions A and purified by preparative TLC (hexane: ethyl acetate = 10:3). **3an** was obtained as a yellow solid (25.2 mg, 56%). <sup>1</sup>H NMR (500 MHz, Chloroform-*d*) δ 11.72 (s, 1H), 9.90 (d, *J* = 0.9 Hz, 1H), 8.33 (s, 1H), 8.14 (dd, *J* = 7.8, 1.4 Hz, 1H), 7.83 (dd, *J* = 7.7, 1.5 Hz, 1H), 7.65 – 7.60 (m, 2H), 7.59 – 7.54 (m, 3H), 7.40 (dd, *J* = 7.6, 1.4 Hz, 1H), 7.27 – 7.18 (m, 6H), 7.09 – 7.07 (m, 2H), 2.27 (s, 3H). <sup>13</sup>C NMR (150 MHz, Chloroform-*d*) δ 191.00, 178.87, 167.31, 143.87, 142.04, 139.55, 136.39, 135.55, 134.42, 133.37, 133.29, 132.38, 131.40, 131.34, 131.12, 130.94, 130.37, 129.56, 128.60, 128.50, 128.23, 127.84, 127.78, 126.64, 126.22, 18.10.

HRMS (ESI-TOF) (*m/z*): Calcd for C<sub>28</sub>H<sub>22</sub>N<sub>2</sub>NaO<sub>2</sub>S, ([M + Na]<sup>+</sup>), 473.1294; found 473.1302.

[α]<sub>D</sub><sup>20</sup> = -95.3 (c = 1.3, CH<sub>2</sub>Cl<sub>2</sub>).

HPLC analysis: Daicel Chiralpak OD-3 column (95:5 hexane: 2-propanol, 1.0 mL/min, 25 °C, 254 nm);

*t*<sub>R</sub> (major) = 14.42 min, *t*<sub>R</sub> (minor) = 26.37 min, 97% ee.

mV

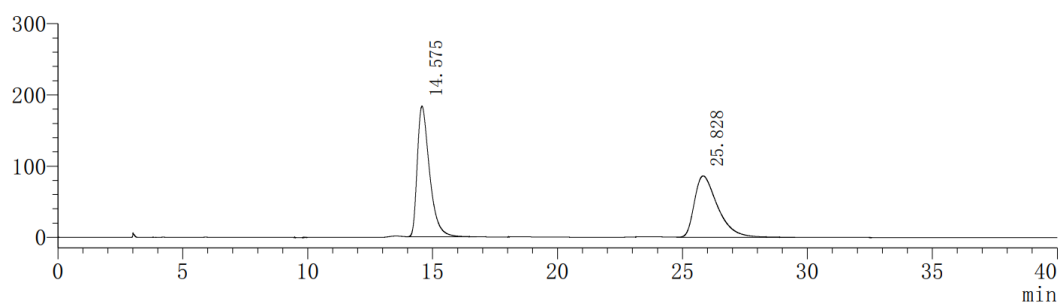

| Peak | Pet Time | Type | Width(min) | Area    | Hight  | Area%   |
|------|----------|------|------------|---------|--------|---------|
| 1    | 14.575   | M    | 0.8721     | 6255344 | 183385 | 52.8318 |
| 2    | 25.828   | M    | 1.6828     | 5584765 | 86295  | 47.1682 |

mV

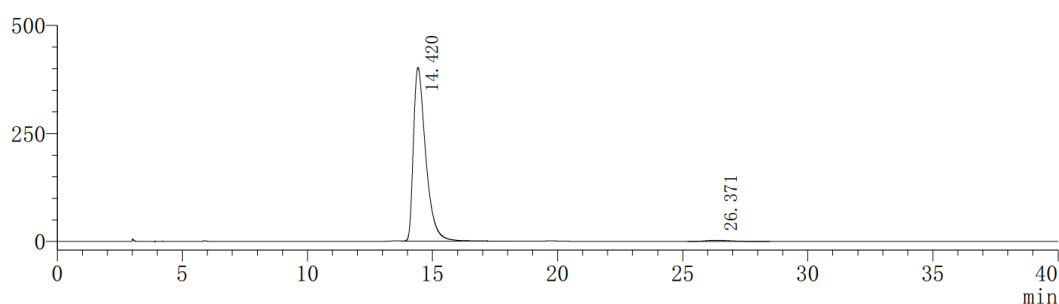

| Peak | Pet Time | Type | Width(min) | Area     | Hight  | Area%   |
|------|----------|------|------------|----------|--------|---------|
| 1    | 14.420   | M    | 0.8690     | 13723104 | 401736 | 98.5413 |
| 2    | 26.371   | M    | 1.7363     | 203149   | 2839   | 1.4587  |

**(R)-6-formyl-N-((2-methoxyphenyl)carbamothioyl)-[1,1':2',1''-terphenyl]-2-carboxamide (3ao)**

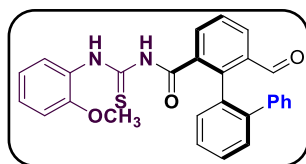

The title compound **3ao** was prepared under the optimized conditions A and purified by preparative TLC (hexane: ethyl acetate = 10:3). **3ao** was obtained as a yellow oil (29.4 mg, 63%). <sup>1</sup>H NMR (500 MHz, Chloroform-*d*) δ 12.22 (s, 1H), 9.84 (d, *J* = 0.8 Hz, 1H), 8.50 (dd, *J* = 8.0, 1.6 Hz, 1H), 8.12 (s, 1H), 8.07 (dd, *J* = 7.8, 1.4 Hz, 1H), 7.77 (dd, *J* = 7.7, 1.4 Hz, 1H), 7.57 – 7.54 (m, 1H), 7.51 – 7.46 (m, 3H), 7.34 (dd, *J* = 7.4, 1.8 Hz, 1H), 7.16 – 7.10 (m, 4H), 7.01 – 6.99 (m, 2H), 6.93 (td, *J* = 7.8, 1.3 Hz, 1H), 6.87 (dd, *J* = 8.2, 1.3 Hz, 1H), 3.81 (s, 3H). <sup>13</sup>C NMR (150 MHz, Chloroform-*d*) δ 191.10, 176.48, 166.59, 151.04, 143.71, 142.16, 139.54, 135.50, 134.52, 133.55, 132.33, 131.47, 131.28, 131.17, 130.29, 129.61, 128.56, 128.45, 128.28, 127.68, 127.22, 127.05, 123.49, 120.39, 110.87, 56.08.

**HRMS** (ESI-TOF) (*m/z*): Calcd for C<sub>28</sub>H<sub>22</sub>N<sub>2</sub>NaO<sub>3</sub>S, ([M + Na]<sup>+</sup>), 489.1243; found 489.1246.

[α]<sub>D</sub><sup>20</sup> = -108.8 (c = 1.5, CH<sub>2</sub>Cl<sub>2</sub>).

**HPLC analysis:** Daicel Chiralpak AD-3 column (95:5 hexane: 2-propanol, 1.0 mL/min, 25 °C, 254 nm); t<sub>R</sub> (major) = 24.49 min, t<sub>R</sub> (minor) = 29.18 min, 99% ee.

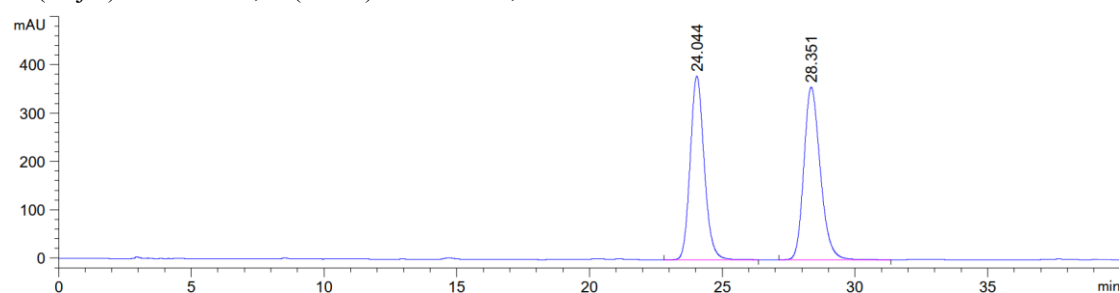

| Peak | Pet Time | Type | Width(min) | Area(mAU*S) | Hight(mAU) | Area%   |
|------|----------|------|------------|-------------|------------|---------|
| 1    | 24.044   | MM   | 0.5657     | 1.39214e4   | 379.76120  | 47.5584 |
| 2    | 28.351   | MM   | 0.6598     | 1.53508e4   | 356.90024  | 52.4416 |

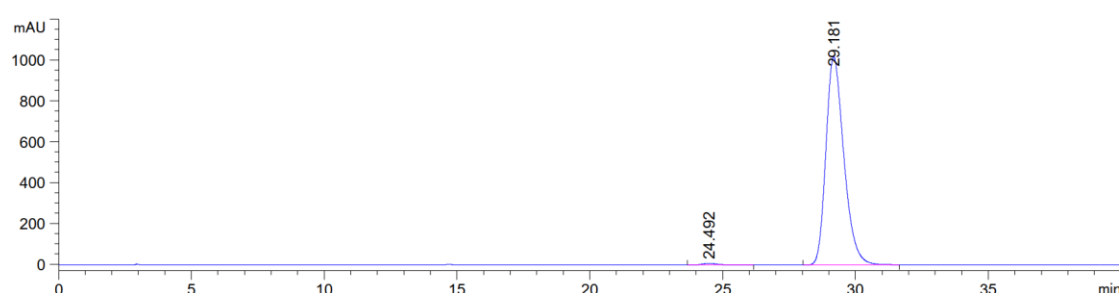

| Peak | Pet Time | Type | Width(min) | Area(mAU*S) | Hight(mAU) | Area%   |
|------|----------|------|------------|-------------|------------|---------|
| 1    | 24.492   | MM   | 0.6261     | 360.05847   | 8.64218    | 0.7473  |
| 2    | 29.181   | MM   | 0.7237     | 4.78238e4   | 1018.71906 | 99.2527 |

**(R)-N-((5-chloro-2-methoxyphenyl)carbamothioyl)-6-formyl-[1,1':2',1''-terphenyl]-2-carboxamide (3ap)**

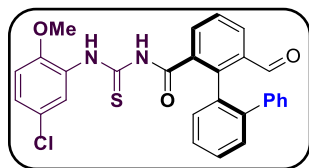

The title compound **3ap** was prepared under the optimized conditions A and purified by preparative TLC (hexane: ethyl acetate = 10:3). **3ap** was obtained as a yellow oil (39.5 mg, 79%). <sup>1</sup>H NMR (500 MHz, Chloroform-*d*) δ 12.38 (s, 1H), 9.89 (s, 1H), 8.78 (d, *J* = 2.5 Hz, 1H), 8.20 (s, 1H), 8.13 (dd, *J* = 7.8, 1.4 Hz, 1H), 7.83 (dd, *J* = 7.7, 1.4 Hz, 1H), 7.63 – 7.60 (m, 1H), 7.58 – 7.53 (m, 3H), 7.40 (d, *J* = 7.4 Hz, 1H), 7.22 – 7.13 (m, 4H), 7.04 – 7.03 (m, 2H), 6.84 (d, *J* = 8.8 Hz, 1H), 3.86 (s, 3H). <sup>13</sup>C NMR (150 MHz, Chloroform-*d*) δ 191.01, 176.37, 166.63, 149.37, 143.63, 142.12, 139.46, 135.50, 134.27, 133.64, 132.23, 131.44, 131.41, 131.21, 130.35, 129.56, 128.55, 128.47, 128.32, 128.18, 127.68, 126.28, 125.33, 122.78, 111.60, 56.40.

**HRMS** (ESI-TOF) (*m/z*): Calcd for C<sub>28</sub>H<sub>21</sub>ClN<sub>2</sub>NaO<sub>3</sub>S, ([M + Na]<sup>+</sup>), 523.0854; found 523.0847.

[α]<sub>D</sub><sup>20</sup> = -96.5 (c = 1.9, CH<sub>2</sub>Cl<sub>2</sub>).

**HPLC analysis:** Daicel Chiralpak OD-H column (95:5 hexane: 2-propanol, 1.0 mL/min, 25 °C, 254 nm);

*t<sub>R</sub>* (major) = 20.76 min, *t<sub>R</sub>* (minor) = 38.23 min, 99% ee.

mV

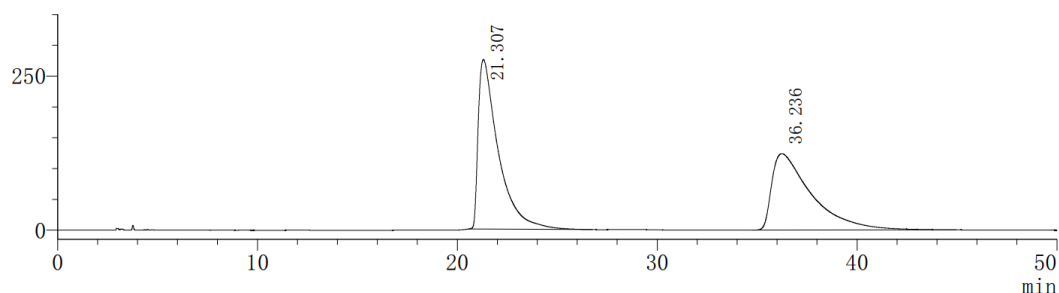

| Peak | Pet Time | Type | Width(min) | Area     | Hight  | Area%   |
|------|----------|------|------------|----------|--------|---------|
| 1    | 21.307   | M    | 1.7305     | 19250524 | 275201 | 52.9101 |
| 2    | 36.236   | M    | 3.4683     | 17132932 | 123945 | 47.0899 |

mV

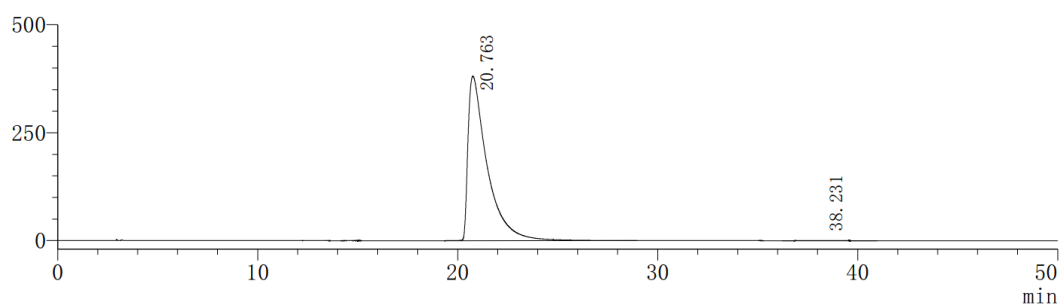

| Peak | Pet Time | Type | Width(min) | Area     | Hight  | Area%   |
|------|----------|------|------------|----------|--------|---------|
| 1    | 20.763   | M    | 1.6351     | 25434112 | 381072 | 99.8861 |
| 2    | 38.231   | M    | 1.9049     | 28995    | 218    | 0.1139  |

**(R)-N-((3,5-bis(trifluoromethyl)phenyl)carbamothioyl)-6-formyl-[1,1':2',1''-terphenyl]-2-carboxamide (3aq)**

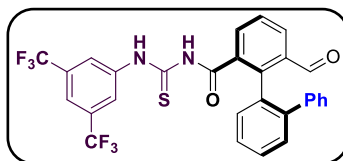

The title compound **3aq** was prepared under the optimized conditions A and purified by preparative TLC (hexane: ethyl acetate = 10:3). **3aq** was obtained as a white solid (23.5 mg, 41%). <sup>1</sup>H NMR (500 MHz, Chloroform-*d*) δ 12.44 (s, 1H), 9.88 (s, 1H), 8.32 (s, 1H), 8.22 (s, 2H), 8.17 (dd, *J* = 7.9, 1.4 Hz, 1H), 7.85 (dd, *J* = 7.7, 1.5 Hz, 1H), 7.75 (s, 1H), 7.67 – 7.64 (m, 1H), 7.61 – 7.57 (m, 3H), 7.41 (dd, *J* = 7.5, 1.4 Hz, 1H), 7.24 – 7.18 (m, 3H), 7.05 (dd, *J* = 8.1, 1.6 Hz, 2H). <sup>13</sup>C NMR (150 MHz, Chloroform-*d*) δ 190.81, 178.23, 167.58, 143.87, 142.02, 139.39, 139.16, 135.72, 133.71, 133.56, 132.46 (q, *J* = 33.5 Hz), 132.10, 131.93, 131.38, 131.37, 130.64, 129.53, 128.68, 128.67, 128.47, 127.95, 123.75 (q, *J* = 3.9 Hz), 123.09 (q, *J* = 271.1 Hz), 120.15 (p, *J* = 3.8 Hz). <sup>19</sup>F NMR (565 MHz, Chloroform-*d*) δ -63.00 (s, 2CF<sub>3</sub>).

**HRMS** (ESI-TOF) (*m/z*): Calcd for C<sub>29</sub>H<sub>18</sub>F<sub>6</sub>N<sub>2</sub>NaO<sub>2</sub>S, ([M + Na]<sup>+</sup>), 595.0885; found 595.0879.

[α]<sub>D</sub><sup>20</sup> = -77.5 (c = 1.2, CH<sub>2</sub>Cl<sub>2</sub>).

**HPLC analysis:** Daicel Chiralpak OD-3 column (95:5 hexane: 2-propanol, 1.0 mL/min, 25 °C, 254 nm);

*t<sub>R</sub>* (major) = 8.99 min, *t<sub>R</sub>* (minor) = 12.90 min, 96% ee.

mV

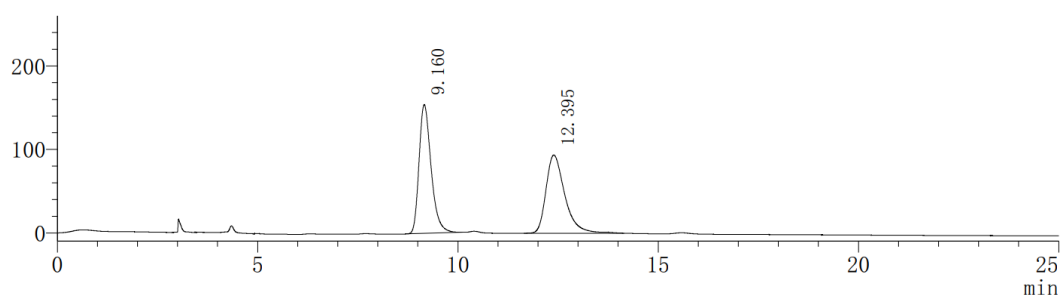

| Peak | Pet Time | Type | Width(min) | Area    | Hight  | Area%   |
|------|----------|------|------------|---------|--------|---------|
| 1    | 9.160    | M    | 0.5397     | 3238625 | 154375 | 51.3867 |
| 2    | 12.395   | M    | 0.8273     | 3063828 | 93682  | 48.6133 |

mV

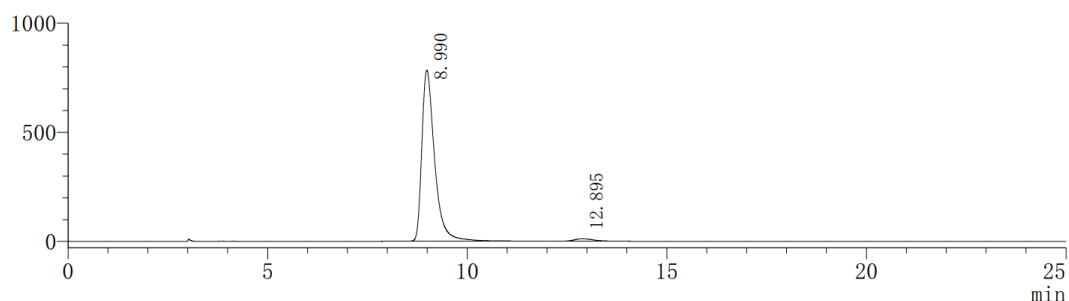

| Peak | Pet Time | Type | Width(min) | Area     | Hight  | Area%   |
|------|----------|------|------------|----------|--------|---------|
| 1    | 8.990    | M    | 0.5524     | 17437157 | 783788 | 97.8201 |
| 2    | 12.895   | M    | 0.8762     | 388582   | 11386  | 2.1799  |

### III Synthetic Applications

#### 3.1 Scale-up synthesis:

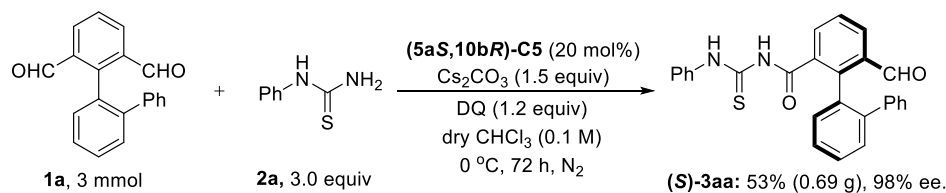

In a nitrogen-filled glovebox, a flame-dried 100 mL Schlenk reaction tube equipped with a magnetic stir bar was charged with **(5aS,10bR)-C5** (20 mol%, 0.298 g), Cs<sub>2</sub>CO<sub>3</sub> (1.466g, 4.5 mmol), [1,1':2',1''-terphenyl]-2,6-dicarbaldehyde **1a** (0.858 g, 3 mmol) and anhydrous chloroform (30.0 mL). The mixture was stirred for 5 minutes, followed by the addition of N-Phenylthiourea **2a** (1.368 g, 3.0 equiv) and 3,3',5,5'-tetra-*tert*-butyldiphenylquinone (1.469 g, 1.2 equiv). Then the tube was sealed with a Thermo Scientific PTFE screw cap equipped with a septum, removed from the glovebox. The reaction mixture was stirred at 0 °C for 72 h. The mixture was concentrated under reduced pressure and purified by *via* column chromatography on silica gel (hexanes/EtOAc = 10:3) to afford 0.69 g product **3aa** in 53% yield with 98% ee.

#### 3.2 Synthetic Transformation

##### 3.2.1,

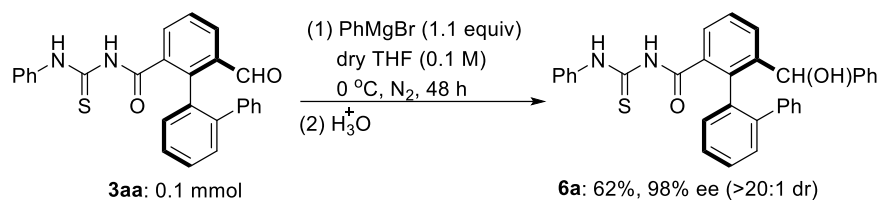

In a nitrogen-filled glovebox, a flame-dried screw-cap reaction tube equipped with a Teflon-coated magnetic stir bar was charged with **3aa** (0.1 mmol, 43.6 mg) and anhydrous tetrahydrofuran (1.0 mL) was added. Then the tube was sealed with a Thermo Scientific PTFE screw cap equipped with a septum, removed from the glovebox. 1 mol/L PhMgBr in THF (110 μL, 1.1 equiv) was added dropwise and stirring at 0 °C for 48 h, until the reaction was complete as indicated by TLC. The reaction mixture was then quenched with water, extracted with CH<sub>2</sub>Cl<sub>2</sub> (3×5 mL). Drying (Na<sub>2</sub>SO<sub>4</sub>) and evaporation of the solvent gave a residue that was purified by silica gel column chromatography (PE : EA = 10:3) to afford the desired product **6a** as a colorless oil. (yield: 62%, 97% ee). <sup>1</sup>H NMR (600 MHz, Chloroform-*d*) δ 12.13 (s, 1H), 8.63 (s, 1H), 7.62 – 7.58 (m, 5H), 7.52 (td, *J* = 7.4, 1.4 Hz, 1H), 7.42 – 7.33 (m, 6H), 7.29 – 7.26 (m, 3H), 7.24 – 7.21 (m, 3H), 7.20 – 7.17 (m, 1H), 7.10 (dd, *J* = 7.5, 1.3 Hz, 1H), 7.04 – 7.03 (m, 2H), 5.57 (d, *J* = 2.6 Hz, 1H), 1.31 (d, *J* = 3.2 Hz, 1H). <sup>13</sup>C NMR (150 MHz, Chloroform-*d*) δ 178.06, 168.91, 143.87, 142.89, 140.80, 140.26, 138.65, 137.52, 135.26, 133.73, 131.78, 130.53, 130.37, 129.52, 129.24, 128.82, 128.48, 128.44, 128.34, 128.10, 127.55, 127.38, 127.00, 126.83, 126.07, 124.12, 71.52. HRMS (ESI-TOF) (*m/z*): Calcd for C<sub>33</sub>H<sub>26</sub>N<sub>2</sub>NaO<sub>2</sub>S, ([M + Na]<sup>+</sup>), 537.1607; found 537.1615.

[α]<sub>D</sub><sup>19</sup> = -14.4 (*c* = 1.6, CH<sub>2</sub>Cl<sub>2</sub>).

**HPLC analysis:** Daicel Chiralpak OD-3 column (95:5 hexane: 2-propanol, 1.0 mL/min, 25 °C, 210 nm); *t<sub>R</sub>* (major) = 18.23 min, *t<sub>R</sub>* (minor) = 21.35 min, 98% ee.

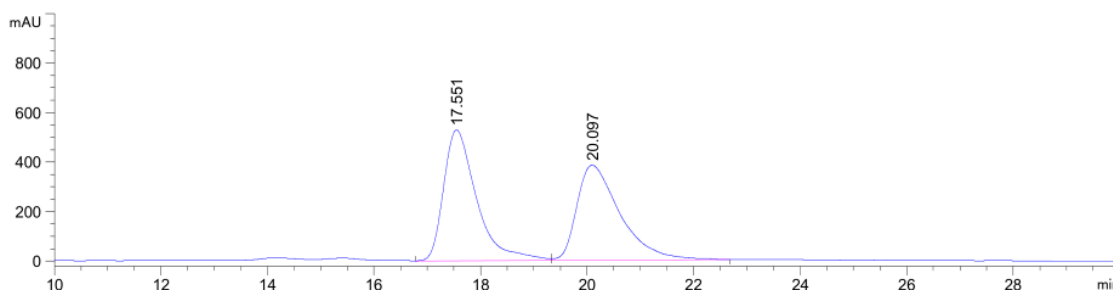

| Peak | RetTime | Type | Width(min) | Area(mAU*S) | Height(mAU) | Area%   |
|------|---------|------|------------|-------------|-------------|---------|
| 1    | 17.551  | M    | 0.6443     | 2.26402e4   | 527.92566   | 51.2619 |
| 2    | 20.097  | M    | 0.8641     | 2.15255e4   | 383.94266   | 48.7381 |

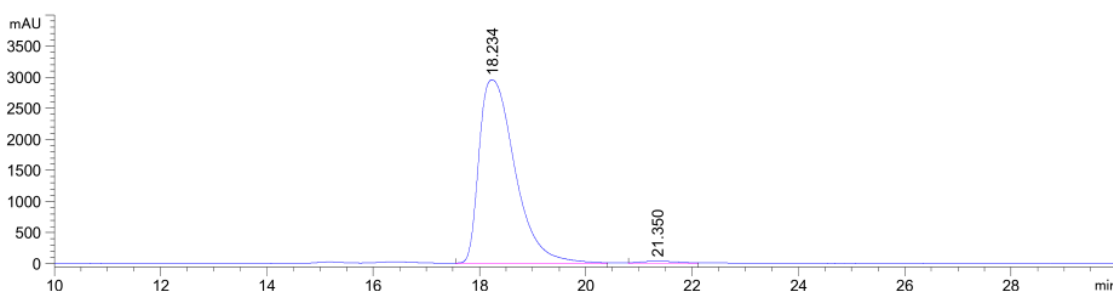

| Peak | RetTime | Type | Width(min) | Area(mAU*S) | Height(mAU) | Area%   |
|------|---------|------|------------|-------------|-------------|---------|
| 1    | 18.234  | M    | 0.7842     | 1.38932e5   | 2952.62573  | 98.7900 |
| 2    | 21.350  | M    | 0.8423     | 1701.69006  | 33.67229    | 1.2100  |

### 3.2.2,

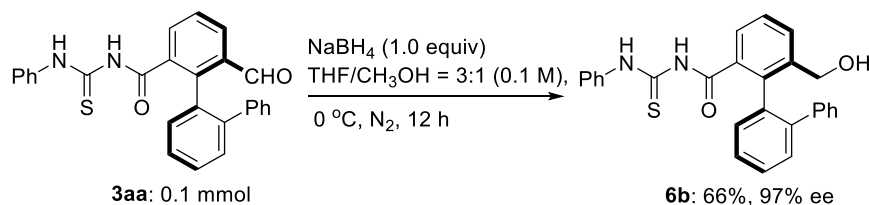

In a nitrogen-filled glovebox, a flame-dried screw-cap reaction tube equipped with a Teflon-coated magnetic stir bar was charged with **3aa** (0.1 mmol, 43.6 mg), NaBH<sub>4</sub> (0.1 mmol, 3.8 mg) and dry THF/CH<sub>3</sub>OH = 3:1 (1.0 mL) was added. Then the tube was sealed with a Thermo Scientific PTFE screw cap equipped with a septum, removed from the glovebox. Reaction mixture was stirred at 0 °C for 12 h, until the reaction was complete as indicated by TLC. The reaction mixture was then quenched with water, extracted with CH<sub>2</sub>Cl<sub>2</sub> (3×5 mL). Drying (Na<sub>2</sub>SO<sub>4</sub>) and evaporation of the solvent gave a residue that was purified by silica gel column chromatography (PE : EA = 1:1) to give the desired product **6b** as a colorless oil. (yield: 66%, 97% ee). <sup>1</sup>H NMR (600 MHz, Chloroform-*d*) δ 12.12 (s, 1H), 8.39 – 8.36 (m, 1H), 7.72 (d, *J* = 7.6 Hz, 1H), 7.60 (d, *J* = 7.9 Hz, 2H), 7.55 – 7.53 (m, 3H), 7.51 – 7.48 (m, 1H), 7.45 – 7.42 (m, 1H), 7.37 (t, *J* = 7.7 Hz, 2H), 7.31 (d, *J* = 7.5 Hz, 1H), 7.26 – 7.23 (m, 1H), 7.20 – 7.19 (m, 3H), 7.13 – 7.12 (m, 2H), 4.47 (d, *J* = 13.5 Hz, 1H), 4.38 (d, *J* = 13.5 Hz, 1H), 1.59 (s, 1H). <sup>13</sup>C NMR (150 MHz, Chloroform-*d*) δ 178.09, 168.46, 140.89, 140.58, 139.93, 138.77, 137.56, 134.86, 133.34, 131.70, 130.79, 129.85, 129.35, 129.19, 128.84, 128.25, 128.17, 128.07, 127.41, 127.14, 126.81, 124.12, 62.66.

**HRMS** (ESI-TOF) (*m/z*): Calcd for C<sub>27</sub>H<sub>22</sub>N<sub>2</sub>NaO<sub>2</sub>S, ([M + Na]<sup>+</sup>), 461.1294; found 461.1297.

[α]<sub>D</sub><sup>19</sup> = +61.2 (*c* = 1.4, CH<sub>2</sub>Cl<sub>2</sub>).

**HPLC analysis:** Daicel Chiralpak OD-3 column (90:10 hexane: 2-propanol, 1.0 mL/min, 25 °C, 210 nm);  $t_R$  (minor) = 13.89 min,  $t_R$  (major) = 29.33 min, 97% ee.

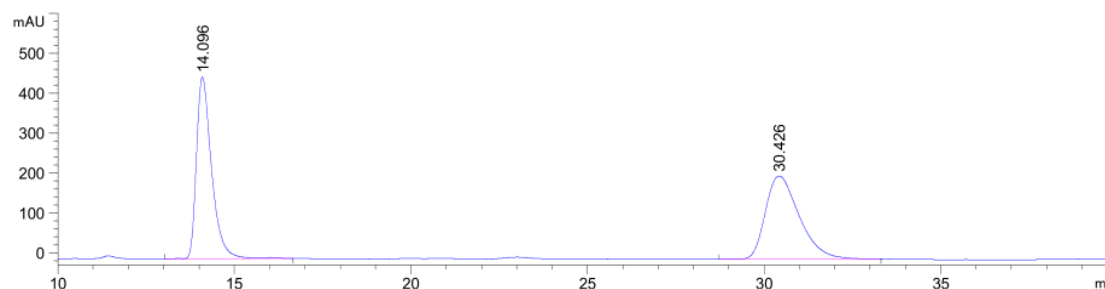

| Peak | PetTime | Type | Width(min) | Area(mAU*S) | Hight(mAU) | Area%   |
|------|---------|------|------------|-------------|------------|---------|
| 1    | 14.096  | M    | 0.4496     | 1.36684e4   | 454.95319  | 49.5241 |
| 2    | 30.426  | M    | 0.9998     | 1.39311e4   | 208.95663  | 50.4759 |

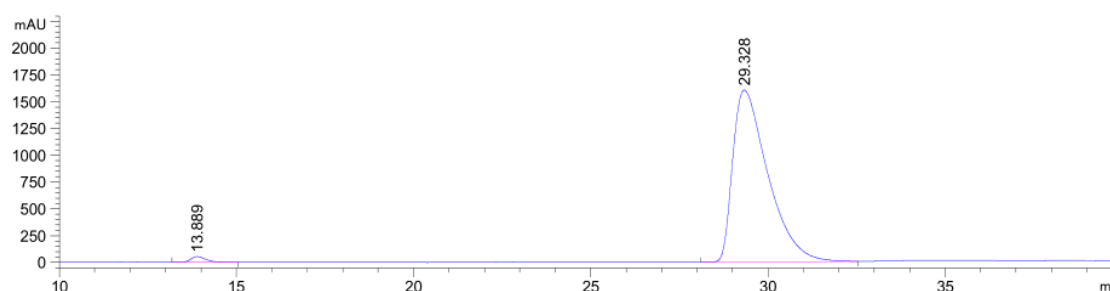

| Peak | PetTime | Type | Width(min) | Area(mAU*S) | Hight(mAU) | Area%   |
|------|---------|------|------------|-------------|------------|---------|
| 1    | 13.889  | M    | 0.4609     | 1650.64404  | 54.11298   | 1.4733  |
| 2    | 29.328  | M    | 1.0359     | 1.10384e5   | 1603.98682 | 98.5267 |

### 3.2.3,

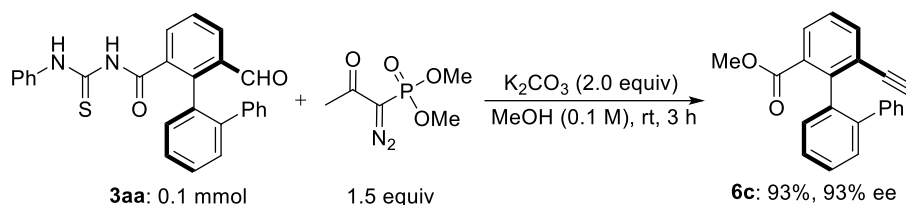

To a solution of **3aa** (0.1 mmol, 43.6 mg) in 1.0 mL MeOH was added  $K_2CO_3$  (0.2 mmol, 27.6 mg), P-(1-diazo-2-oxopropyl)-dimethylester (0.15 mmol, 22.5  $\mu$ L) is slowly added. the reaction mixture was stirred at rt for 3 h, until the reaction was complete as indicated by TLC. The reaction mixture was then quenched with water, extracted with  $CH_2Cl_2$  (3 $\times$ 5 mL). Drying ( $Na_2SO_4$ ) and evaporation of the solvent gave a residue that was purified by silica gel column chromatography (PE : EA = 10 : 3) to give the desired **6c** (yield: 93%, 93% ee).  $^1H$  NMR (600 MHz, Chloroform-*d*)  $\delta$  7.70 (dd,  $J$  = 7.8, 1.3 Hz, 1H), 7.60 (dd,  $J$  = 7.8, 1.3 Hz, 1H), 7.45 (t,  $J$  = 7.1 Hz, 1H), 7.41 – 7.38 (m, 2H), 7.28 – 7.24 (m, 2H), 7.14 (s, 5H), 3.55 (s, 3H), 2.94 (s, 1H).  $^{13}C$  NMR (150 MHz, Chloroform-*d*)  $\delta$  167.25, 145.14, 141.13, 140.98, 137.82, 135.94, 131.90, 130.00, 129.75, 129.54, 129.45, 127.98, 127.52, 126.93, 126.72, 126.57, 124.07, 82.15, 81.49, 52.01.

**HRMS** (ESI-TOF) (m/z): Calcd for  $C_{22}H_{16}NaO_2$ , ( $[M + Na]^+$ ), 335.1043; found 335.1041.

$[\alpha]_D^{19}$  = -46.2 (c = 1.3,  $CH_2Cl_2$ ).

**HPLC analysis:** Daicel Chiralpak OD-3 column (95:5 hexane: 2-propanol, 1.0 mL/min, 25 °C, 210 nm);  $t_R$  (minor) = 8.05 min,  $t_R$  (major) = 9.69 min, 93% ee.

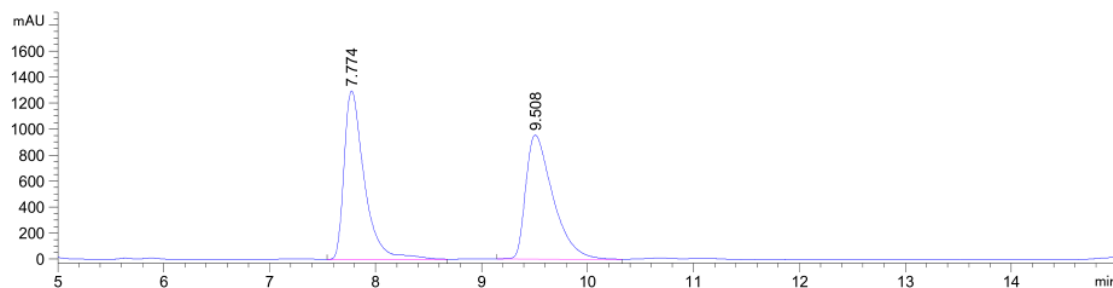

| Peak | PetTime | Type | Width(min) | Area(mAU*S) | Hight(mAU) | Area%   |
|------|---------|------|------------|-------------|------------|---------|
| 1    | 7.774   | M    | 0.2217     | 1.72696e4   | 1298.02734 | 50.4089 |
| 2    | 9.508   | M    | 0.2971     | 1.69894e4   | 953.02484  | 49.5911 |

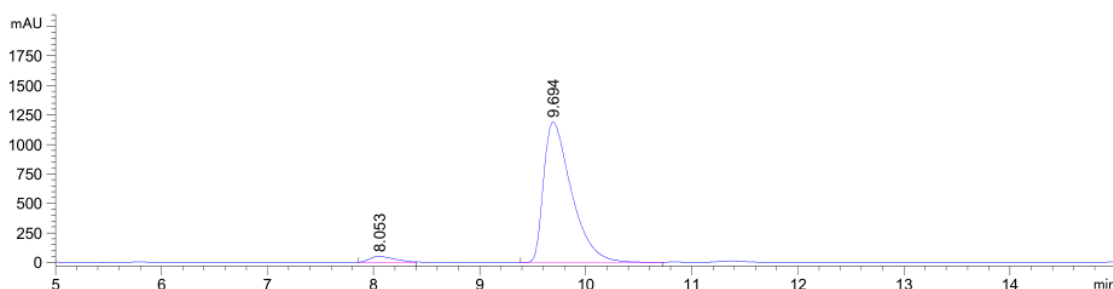

| Peak | PetTime | Type | Width(min) | Area(mAU*S) | Hight(mAU) | Area%   |
|------|---------|------|------------|-------------|------------|---------|
| 1    | 8.053   | M    | 0.2667     | 811.93359   | 50.73443   | 3.5703  |
| 2    | 9.694   | M    | 0.3068     | 2.19294e4   | 1191.48743 | 96.4297 |

### 3.2.4,

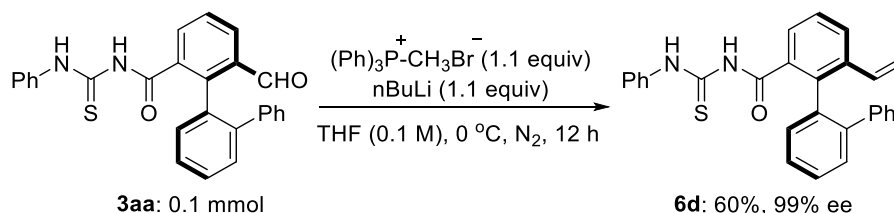

In a nitrogen-filled glovebox, a flame-dried screw-cap reaction tube equipped with a Teflon-coated magnetic stir bar was charged with methyltriphenylphosphonium bromide (0.11 mmol, 39.3 mg), anhydrous tetrahydrofuran (0.5 mL) and *n*BuLi of 2.5 mol/L in hexane (0.11 mmol, 45  $\mu$ L) was added. Then the tube was sealed with a Thermo Scientific PTFE screw cap equipped with a septum, removed from the glovebox. The mixture was stirred at 0 °C for 30 minutes, followed by tetrahydrofuran solution (0.5 mL) dissolved in **3aa** (0.1 mmol, 43.6 mg) was added dropwise and stirring at 0 °C for 12 h, until the reaction was complete as indicated by TLC. The reaction mixture was then quenched with water, extracted with  $\text{CH}_2\text{Cl}_2$  (3 $\times$ 5 mL). Drying ( $\text{Na}_2\text{SO}_4$ ) and evaporation of the solvent gave a residue that was purified by silica gel column chromatography (PE : EA = 10:3) to give the desired **6d** (yield: 60 %, 99% ee).  $^1\text{H NMR}$  (600 MHz, Chloroform-*d*)  $\delta$  12.11 (s, 1H), 8.08 (s, 1H), 7.82 (d,  $J$  = 7.8 Hz, 1H), 7.62 (d,  $J$  = 8.0 Hz, 2H), 7.55 – 7.50 (m, 3H), 7.45 (d,  $J$  = 7.6 Hz, 1H), 7.38 (t,  $J$  = 7.8 Hz, 3H), 7.34 – 7.31 (m, 1H), 7.25 (t,  $J$  = 7.6 Hz, 1H), 7.21 – 7.16 (m, 3H), 7.05 – 7.03 (m, 2H), 6.61 (dd,  $J$  = 17.4, 11.0 Hz, 1H), 5.71 (d,  $J$  = 17.4 Hz, 1H), 5.26 (d,  $J$  = 10.9 Hz, 1H).  $^{13}\text{C NMR}$  (150 MHz, Chloroform-*d*)  $\delta$  177.99, 168.26, 141.32, 139.98, 138.73, 138.54, 137.64, 135.09, 134.74, 133.55, 131.07, 130.75, 129.37, 129.26, 128.83, 128.11, 127.88, 127.49, 127.25, 126.73, 124.05, 116.71.



**HRMS** (ESI-TOF) ( $m/z$ ): Calcd for  $C_{28}H_{22}N_2NaOS$ , ( $[M + Na]^+$ ), 457.1345; found 457.1344.

$[\alpha]_D^{19} = -26.7$  ( $c = 1.4$ ,  $CH_2Cl_2$ ).

**HPLC analysis:** Daicel Chiralpak OD-3 column (95:5 hexane: 2-propanol, 1.0 mL/min, 25 °C, 210 nm);  $t_R$  (major) = 10.21 min,  $t_R$  (minor) = 12.24 min, 99% ee.

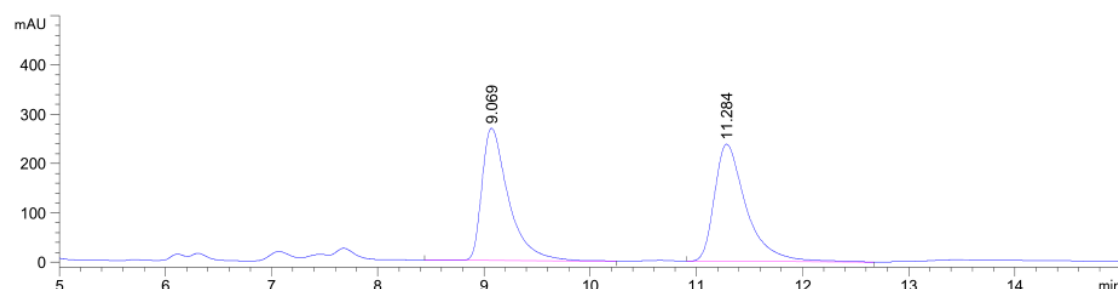

| Peak | RetTime | Type | Width(min) | Area(mAU*S) | Hight(mAU) | Area%   |
|------|---------|------|------------|-------------|------------|---------|
| 1    | 9.069   | M    | 0.2605     | 4679.21387  | 268.27173  | 48.6477 |
| 2    | 11.284  | M    | 0.3107     | 4939.35986  | 237.45549  | 51.3523 |

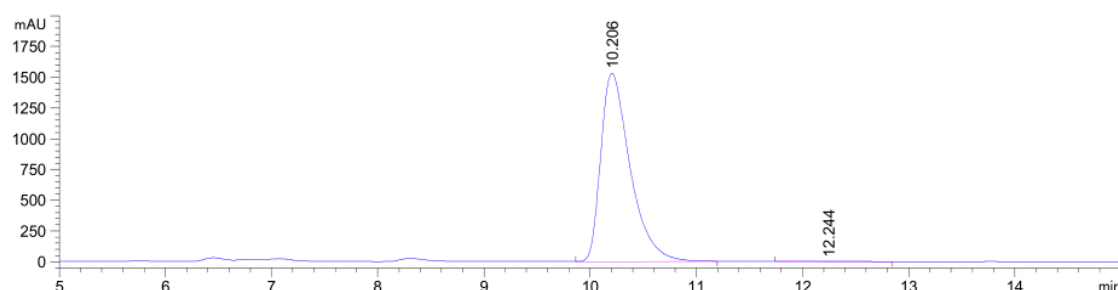

| Peak | RetTime | Type | Width(min) | Area(mAU*S) | Hight(mAU) | Area%   |
|------|---------|------|------------|-------------|------------|---------|
| 1    | 10.206  | M    | 0.3195     | 2.93789e4   | 1532.35950 | 99.8537 |
| 2    | 12.244  | M    | 0.4661     | 43.03435    | 1.53870    | 0.1463  |

### 3.2.5,

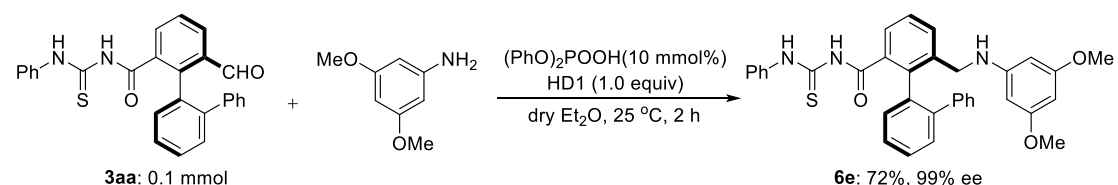

A 10 mL vial containing a magnetic stir bar, was added (**S**)-**3aa** (43.6 mg, 0.1 mmol, 1.0 equiv), diphenyl phosphate (2.5 mg, 0.01 mmol, 0.1 equiv), Diethyl 1,4-dihydro-2,6-dimethyl-3,5-pyridinedicarboxylate (HD1) (25.4 mg, 0.01 mmol, 1.0 equiv), 3,5-dimethoxyaniline (15.2 mg, 0.1 mmol, 1.0 equiv) and 7.5 ml dry  $Et_2O$ . After stirring at the 25 °C for 2 h, the reaction mixture concentrated in vacuo to give a residue, which was purified by flash chromatography to give the desired **6e** (yield: 72%, 99% ee).  $R_f=0.30$  (hexanes/ $EtOAc = 10:3$ ).  **$^1H$  NMR (600 MHz, Chloroform- $d$ )**  $\delta$  12.14 (s, 1H), 8.47 (s, 1H), 7.62 – 7.51 (m, 6H), 7.48 (td,  $J = 7.3, 1.9$  Hz, 1H), 7.39 – 7.36 (m, 3H), 7.32 (d,  $J = 7.4$  Hz, 1H), 7.24 – 7.17 (m, 6H), 5.85 (s, 1H), 5.56 (d,  $J = 2.1$  Hz, 2H), 4.03 (d,  $J = 15.7$  Hz, 1H), 3.83 (d,  $J = 15.7$  Hz, 1H), 3.69 (s, 6H), 1.57 (s, 1H).  **$^{13}C$  NMR (150 MHz, Chloroform- $d$ )**  $\delta$  178.08, 168.60, 161.71, 149.56, 140.97, 140.16, 139.47, 139.17, 137.58, 135.18, 133.73, 131.79, 130.82, 129.65, 129.30, 129.18, 128.82, 128.24, 128.15, 128.12, 127.36, 126.79, 126.73, 124.10, 91.85, 89.96, 55.16, 45.90.

**HRMS** (ESI-TOF) ( $m/z$ ): Calcd for  $C_{35}H_{31}N_3NaO_3S$ , ( $[M + Na]^+$ ), 596.1978; found 596.1968.

$[\alpha]_D^{19} = +64.8$  ( $c = 1.5$ ,  $\text{CH}_2\text{Cl}_2$ ).

**HPLC analysis:** Daicel Chiralpak IC-3 column (80:20 hexane: 2-propanol, 1.0 mL/min, 25 °C, 210 nm);  $t_R$  (major) = 20.81 min,  $t_R$  (minor) = 25.49 min, 99% ee.

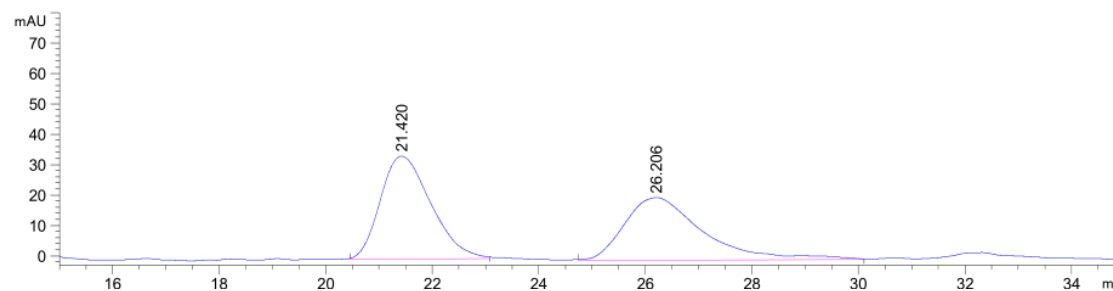

| Peak | RetTime | Type | Width(min) | Area(mAU*S) | Hight(mAU) | Area%   |
|------|---------|------|------------|-------------|------------|---------|
| 1    | 21.420  | M    | 1.0983     | 2231.33032  | 33.85986   | 51.4517 |
| 2    | 26.206  | M    | 1.7051     | 2105.41846  | 20.57980   | 48.5483 |

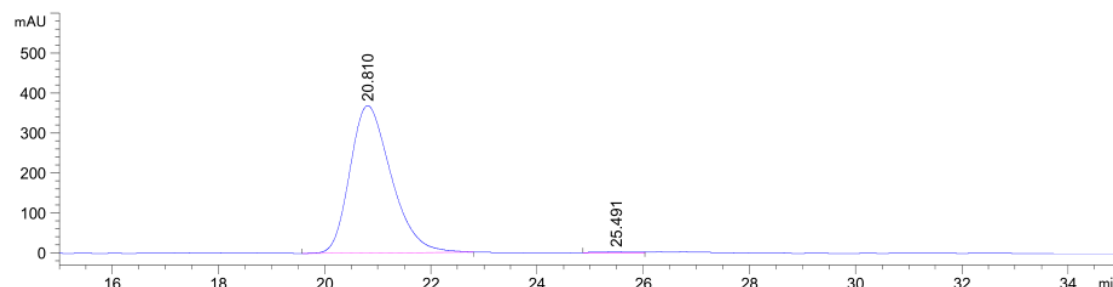

| Peak | RetTime | Type | Width(min) | Area(mAU*S) | Hight(mAU) | Area%   |
|------|---------|------|------------|-------------|------------|---------|
| 1    | 20.810  | M    | 0.8293     | 1.98448e4   | 368.47266  | 99.6041 |
| 2    | 25.491  | M    | 0.7105     | 78.88506    | 1.85039    | 0.3959  |

### 3.2.6,

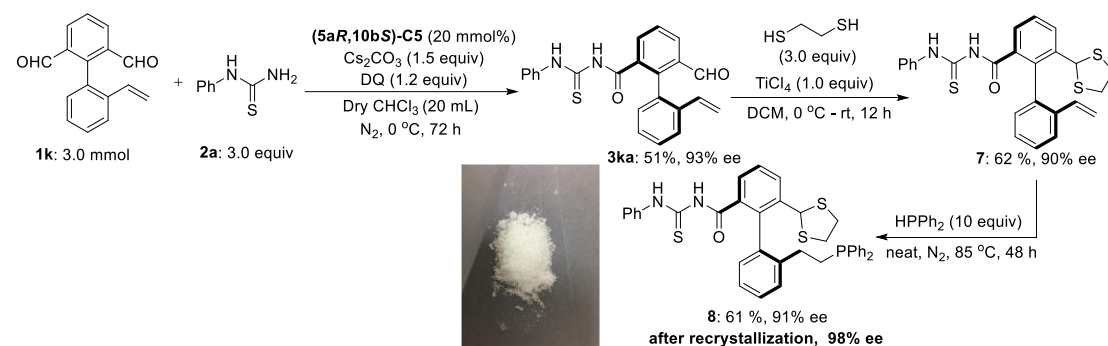

In a nitrogen-filled glovebox, a flame-dried 100 mL Schlenk reaction tube equipped with a magnetic stir bar was charged with (**5aR,10bS**)-C5 (20 mol%, 0.298 g),  $\text{Cs}_2\text{CO}_3$  (1.466g, 4.5 mmol), 2'-vinyl-[1,1'-biphenyl]-2,6-dicarbaldehyde **1k** (0.708 g, 3 mmol) and anhydrous  $\text{CHCl}_3$  (20.0 mL). The mixture was stirred for 5 minutes, followed by the addition of N-Phenylthiourea **2a** (1.368 g, 3.0 equiv) and 3,3',5,5'-tetra-*tert*-butyldiphenylquinone (1.469 g, 1.2 equiv). Then the tube was sealed with a Thermo Scientific PTFE screw cap equipped with a septum, removed from the glovebox. The reaction mixture was stirred at 0 °C for 72 h. The mixture was concentrated under reduced pressure and purified by *via* column chromatography on silica gel (hexanes/EtOAc = 10:3) to afford 0.59 g product (*R*)-**3ka** in 51% yield with 93% ee.

**HPLC analysis:** Daicel Chiralpak AD-3 column (95:5 hexane: 2-propanol, 1.0 mL/min, 25 °C, 254 nm);

$t_R$  (minor) = 21.76 min,  $t_R$  (major) = 26.29 min, 93% ee.

mV

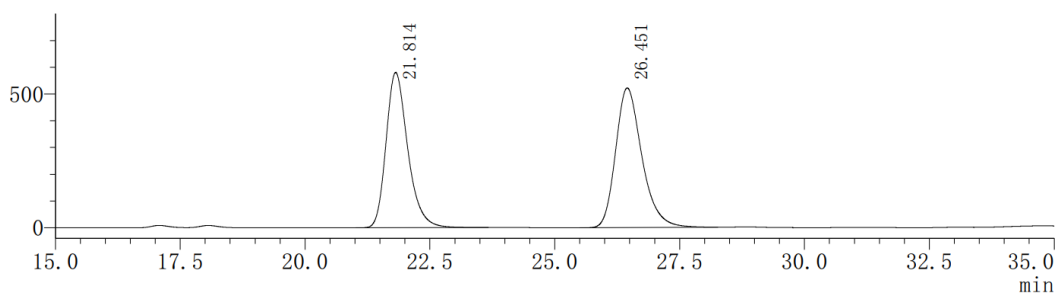

| Peak | PetTime | Type | Width(min) | Area     | Hight  | Area%   |
|------|---------|------|------------|----------|--------|---------|
| 1    | 21.814  | M    | 0.7757     | 17580171 | 580416 | 47.8992 |
| 2    | 26.451  | M    | 0.9397     | 19122252 | 522116 | 52.1008 |

mV

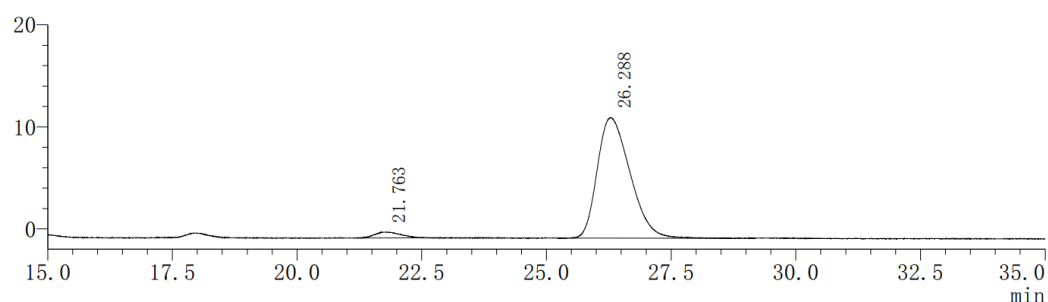

| Peak | PetTime | Type | Width(min) | Area   | Hight | Area%   |
|------|---------|------|------------|--------|-------|---------|
| 1    | 21.763  | M    | 0.8225     | 20744  | 566   | 3.7030  |
| 2    | 26.288  | M    | 1.1892     | 539444 | 11817 | 96.2970 |

Titanium chloride (143  $\mu$ L, 1.3 mmol) was added to a mixture of (*R*)-**3ka** (0.49 g, 1.3 mmol) and 1,2-ethanedithiol (327  $\mu$ L, 3.9 mmol) in 5.0 mL  $\text{CH}_2\text{Cl}_2$  at 0 °C. The mixture was stirred at room temperature for 12 h, then poured into water. The organic layer was washed with water and brine, dried, and concentrated in vacuo. The residue was purification by column chromatography (Petroleum ether/EtOAc = 10:3) gave pure product **7** (white solid, 372 mg, yield: 62%, 90% ee).  **$^1\text{H}$  NMR (600 MHz, Chloroform-*d*)**  $\delta$  12.11 (s, 1H), 8.40 (s, 1H), 8.21 (dd,  $J$  = 8.0, 1.3 Hz, 1H), 7.72 (td,  $J$  = 8.7, 1.4 Hz, 2H), 7.58 – 7.55 (m, 3H), 7.48 (td,  $J$  = 7.6, 1.5 Hz, 1H), 7.44 (td,  $J$  = 7.5, 1.5 Hz, 1H), 7.35 – 7.33 (m, 2H), 7.24 – 7.20 (m, 2H), 6.38 (dd,  $J$  = 17.4, 11.0 Hz, 1H), 5.75 (d,  $J$  = 17.4 Hz, 1H), 5.30 (s, 1H), 5.28 (d,  $J$  = 11.1 Hz, 1H), 3.53 – 3.44 (m, 2H), 3.28 – 3.20 (m, 2H).  **$^{13}\text{C}$  NMR (125 MHz, Chloroform-*d*)**  $\delta$  177.72, 168.15, 141.09, 137.66, 137.55, 136.72, 134.42, 133.84, 133.55, 133.00, 129.70, 129.59, 128.90, 128.75, 128.65, 128.21, 126.68, 126.51, 123.96, 117.79, 52.07, 40.64, 40.42.

**HRMS** (ESI-TOF) ( $m/z$ ): Calcd for  $\text{C}_{25}\text{H}_{22}\text{N}_2\text{NaOS}_3$ , ( $[\text{M} + \text{Na}]^+$ ), 485.0786; found 485.0786.

$[\alpha]_D^{19}$  = 13.7 ( $c$  = 1.0,  $\text{CH}_2\text{Cl}_2$ ).

**HPLC analysis:** Daicel Chiralpak AD-3 column (95:5 hexane: 2-propanol, 1.0 mL/min, 25 °C, 254 nm);

$t_R$  (minor) = 23.54 min,  $t_R$  (major) = 26.92 min, 90% ee.

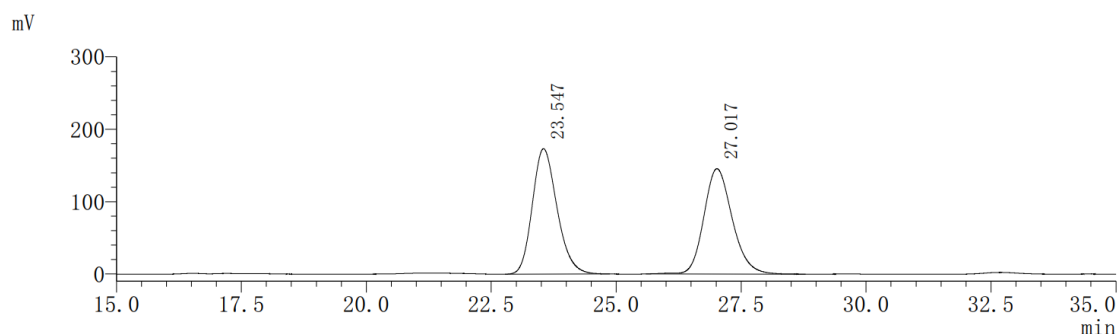

| Peak | PetTime | Type | Width(min) | Area    | Hight  | Area%   |
|------|---------|------|------------|---------|--------|---------|
| 1    | 23.547  | M    | 0.9005     | 5963759 | 173375 | 50.8668 |
| 2    | 27.017  | M    | 1.0245     | 5760496 | 145512 | 49.1332 |

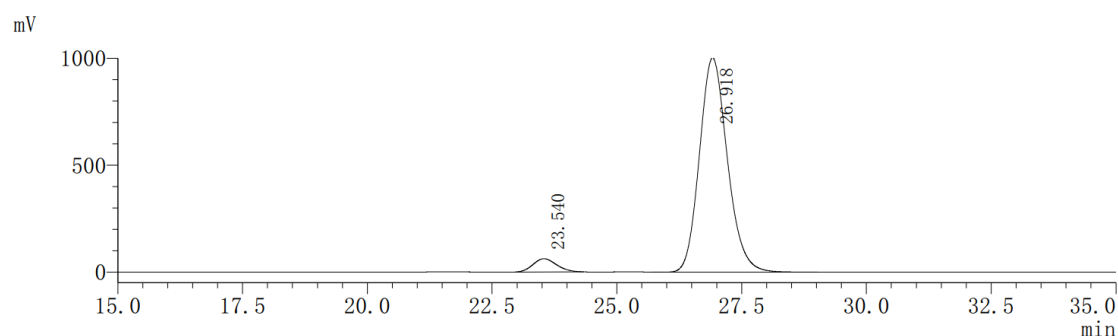

| Peak | PetTime | Type | Width(min) | Area     | Hight   | Area%   |
|------|---------|------|------------|----------|---------|---------|
| 1    | 23.540  | M    | 0.8720     | 2043142  | 62104   | 4.9743  |
| 2    | 26.918  | M    | 1.0147     | 39031233 | 1002870 | 95.0257 |

In a nitrogen-filled glovebox, a flame-dried 10 mL Schlenk reaction tube equipped with a magnetic stir bar was charged with **7** (0.370 g, 0.8 mmol), diphenylphosphine (1.4 mL, 10.0 equiv). Then the tube was sealed with a Thermo Scientific PTFE screw cap equipped with a septum, removed from the glovebox. The reaction mixture was stirred at 85 °C for 48 h. The mixture was concentrated under reduced pressure and purified by *via* column chromatography on silica gel (hexanes/Et<sub>2</sub>O = 2:1) to afford 0.316 g product **8** in 61% yield with 91% ee (white solid). [**8**: 98% ee (after recrystallization)]. <sup>1</sup>H NMR (600 MHz, Chloroform-*d*) δ 12.13 (s, 1H), 8.40 (s, 1H), 8.17 (dd, *J* = 8.1, 1.3 Hz, 1H), 7.68 (dd, *J* = 7.7, 1.3 Hz, 1H), 7.56 – 7.51 (m, 3H), 7.45 – 7.38 (m, 3H), 7.33 (t, *J* = 7.9 Hz, 2H), 7.31 – 7.28 (m, 2H), 7.27 – 7.20 (m, 10H), 5.19 (s, 1H), 3.53 – 3.49 (m, 1H), 3.46 – 3.42 (m, 1H), 3.26 – 3.17 (m, 2H), 2.49 – 2.45 (m, 2H), 2.21 – 2.18 (m, 2H). <sup>13</sup>C NMR (150 MHz, Chloroform-*d*) δ 177.66, 167.78, 141.00 (d, *J* = 14.0 Hz), 140.91, 137.96, 137.52, 134.84, 133.46, 132.75 (d, *J* = 2.5 Hz), 132.63 (d, *J* = 2.3 Hz), 132.53, 130.33, 129.70 (d, *J* = 5.5 Hz), 128.74, 128.59 (d, *J* = 6.3 Hz), 128.55, 128.50, 128.45, 128.39, 128.35, 127.26, 126.66, 123.97, 52.24, 40.81, 40.41, 29.73 (d, *J* = 18.2 Hz), 29.23 (d, *J* = 12.5 Hz). <sup>31</sup>P NMR (243 MHz, Chloroform-*d*) δ -14.95.

HRMS (ESI-TOF) (*m/z*): Calcd for C<sub>37</sub>H<sub>33</sub>N<sub>2</sub>NaOPS<sub>3</sub>, ([M + Na]<sup>+</sup>), 671.1385; found 671.1333.

[α]<sub>D</sub><sup>19</sup> = -6.3 (c = 1.0, CH<sub>2</sub>Cl<sub>2</sub>).

HPLC analysis: Daicel Chiralpak OD-3 column (95:5 hexane: 2-propanol, 1.0 mL/min, 25 °C, 254 nm); t<sub>R</sub> (minor) = 14.50 min, t<sub>R</sub> (major) = 15.75 min, 91% ee.

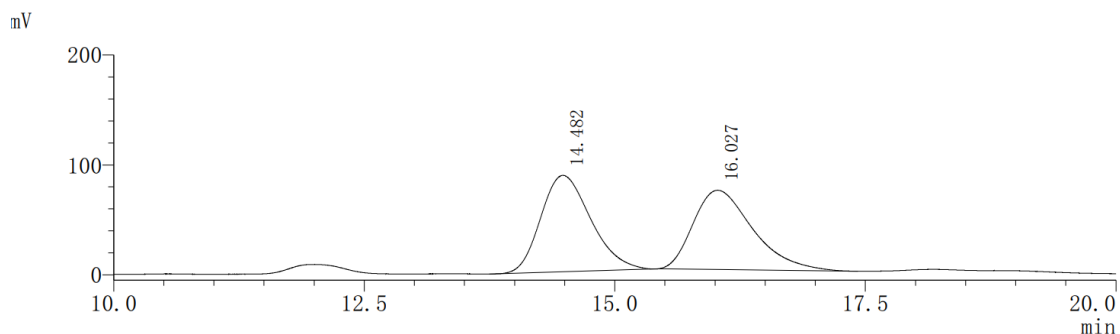

| Peak | PetTime | Type | Width(min) | Area    | Hight | Area%   |
|------|---------|------|------------|---------|-------|---------|
| 1    | 14.482  | M    | 0.9180     | 3036369 | 87700 | 50.4791 |
| 2    | 16.027  | M    | 1.0804     | 2978726 | 72121 | 49.5209 |

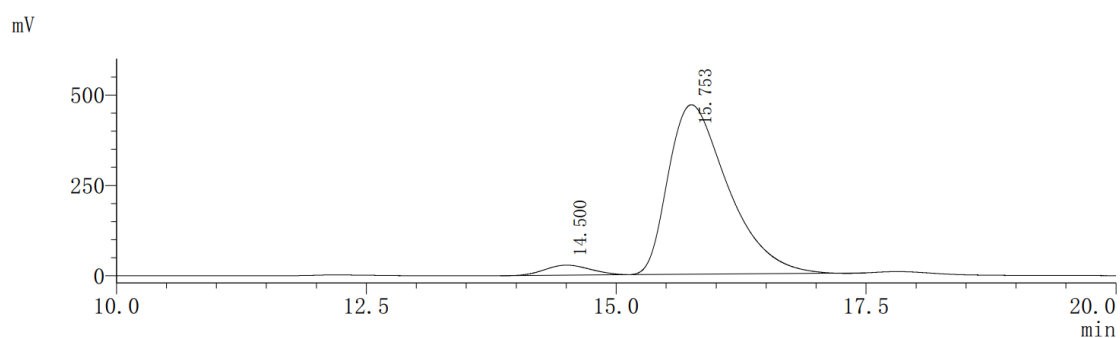

| Peak | PetTime | Type | Width(min) | Area     | Hight  | Area%   |
|------|---------|------|------------|----------|--------|---------|
| 1    | 14.500  | M    | 0.8451     | 875578   | 27774  | 4.3090  |
| 2    | 15.753  | M    | 1.0921     | 19443933 | 468371 | 95.6910 |

### HPLC of 8 after recrystallization

**HPLC analysis:** Daicel Chiralpak OD-3 column (95:5 hexane: 2-propanol, 1.0 mL/min, 25 °C, 254 nm);

$t_R$  (minor) = 14.75 min,  $t_R$  (major) = 16.16 min, 98% ee.

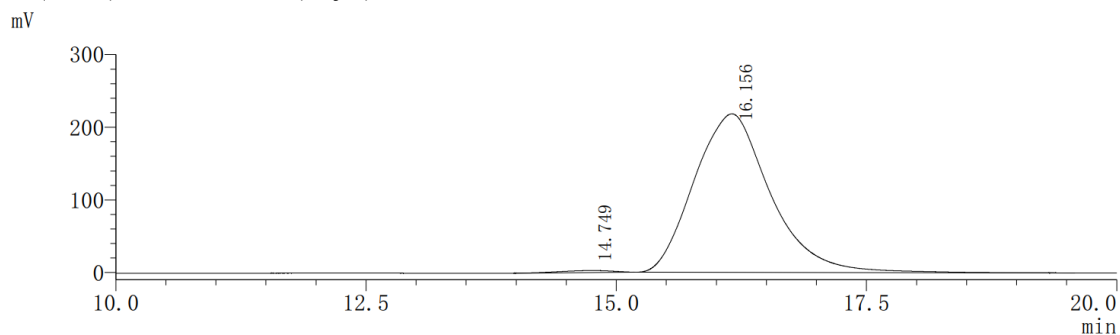

| Peak | PetTime | Type | Width(min) | Area     | Hight  | Area%   |
|------|---------|------|------------|----------|--------|---------|
| 1    | 14.749  | M    | 0.9051     | 99556    | 2778   | 0.8540  |
| 2    | 16.156  | M    | 1.3967     | 11557565 | 218083 | 99.1460 |

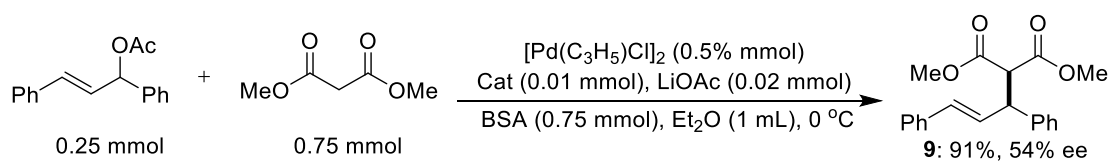

To a mixture of chiral ligand **8** (0.01 mmol),  $[\text{Pd}(\eta\text{-C}_3\text{H}_5\text{Cl})_2]$  (0.005 mmol, 1.4 mg) and LiOAc (0.02 mmol, 1.3 mg) in diethyl ether (1 mL) were added BSA (0.75 mmol, 152.0 mg) and allylic ester (0.25 mmol, 63.0 mg) at 0 °C under argon atmosphere. After 1 h, malonate (0.75 mmol) was added. After 36 h, the reaction mixture was diluted with diethyl ether and water. The organic layer was washed with brine and dried over  $\text{Na}_2\text{SO}_4$ . The filtrate was concentrated and purified by column chromatography to afford the product **9**.  $^1\text{H NMR}$  (500 MHz, Chloroform-*d*)  $\delta$  7.33 – 7.18 (m, 10H), 6.48 (d,  $J = 15.7$  Hz, 1H), 6.33 (dd,  $J = 15.7, 8.6$  Hz, 1H), 4.27 (dd,  $J = 10.9, 8.7$  Hz, 1H), 3.95 (d,  $J = 10.9$  Hz, 1H), 3.70 (s, 3H), 3.52 (s, 3H).  $^{13}\text{C NMR}$  (150 MHz, Chloroform-*d*)  $\delta$  168.20, 167.79, 140.18, 136.84, 131.85, 129.13, 128.73, 128.49, 127.88, 127.58, 127.18, 126.40, 57.67, 52.64, 52.46, 49.21.

**HRMS** (ESI-TOF) ( $m/z$ ): Calcd for  $\text{C}_{20}\text{H}_{20}\text{NaO}_4$ ,  $([\text{M} + \text{Na}]^+)$ , 347.1254; found 347.1254.

**HPLC analysis:** Daicel Chiralpak AD-3 column (97:3 hexane: 2-propanol, 1.0 mL/min, 25 °C, 254 nm);  $t_{\text{R}}$  (minor) = 23.22 min,  $t_{\text{R}}$  (major) = 33.72 min, 54% ee.

mV

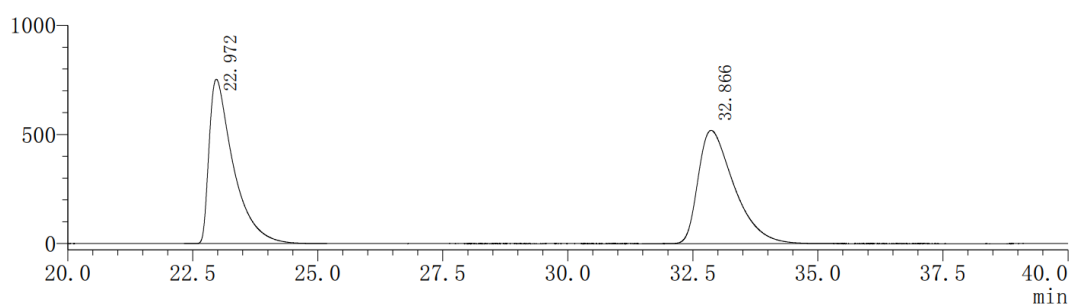

| Peak | PetTime | Type | Width(min) | Area     | Hight  | Area%   |
|------|---------|------|------------|----------|--------|---------|
| 1    | 22.972  | M    | 0.8412     | 25399486 | 754272 | 49.4491 |
| 2    | 32.866  | M    | 1.3109     | 25965397 | 519655 | 50.5509 |

mV

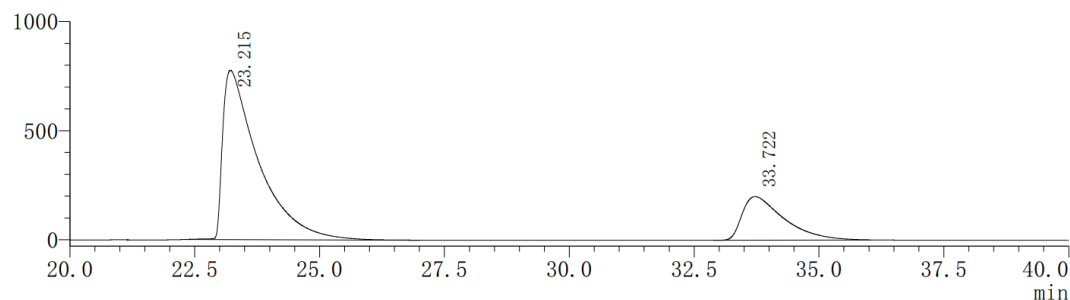

| Peak | PetTime | Type | Width(min) | Area     | Hight  | Area%   |
|------|---------|------|------------|----------|--------|---------|
| 1    | 23.215  | M    | 1.2638     | 38689255 | 776750 | 76.9770 |
| 2    | 33.722  | M    | 1.5234     | 11571554 | 199754 | 23.0230 |

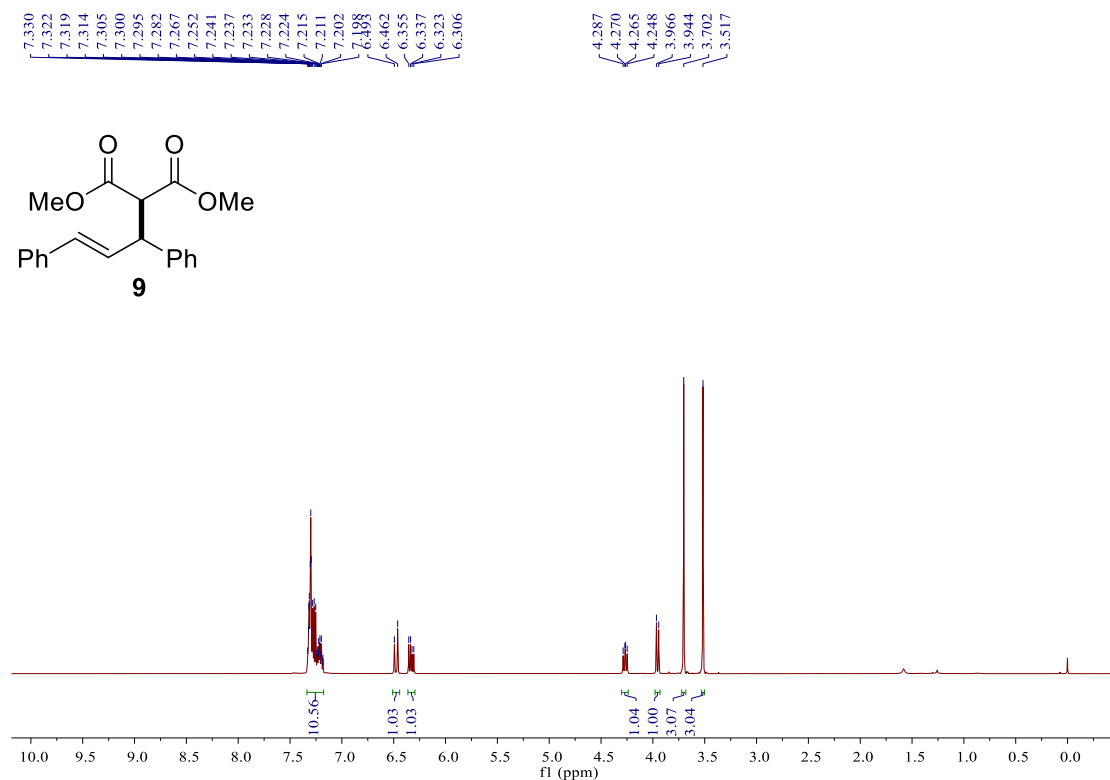

**$^1\text{H}$  NMR (500 MHz,  $\text{CDCl}_3$ ) spectrum of 9.**

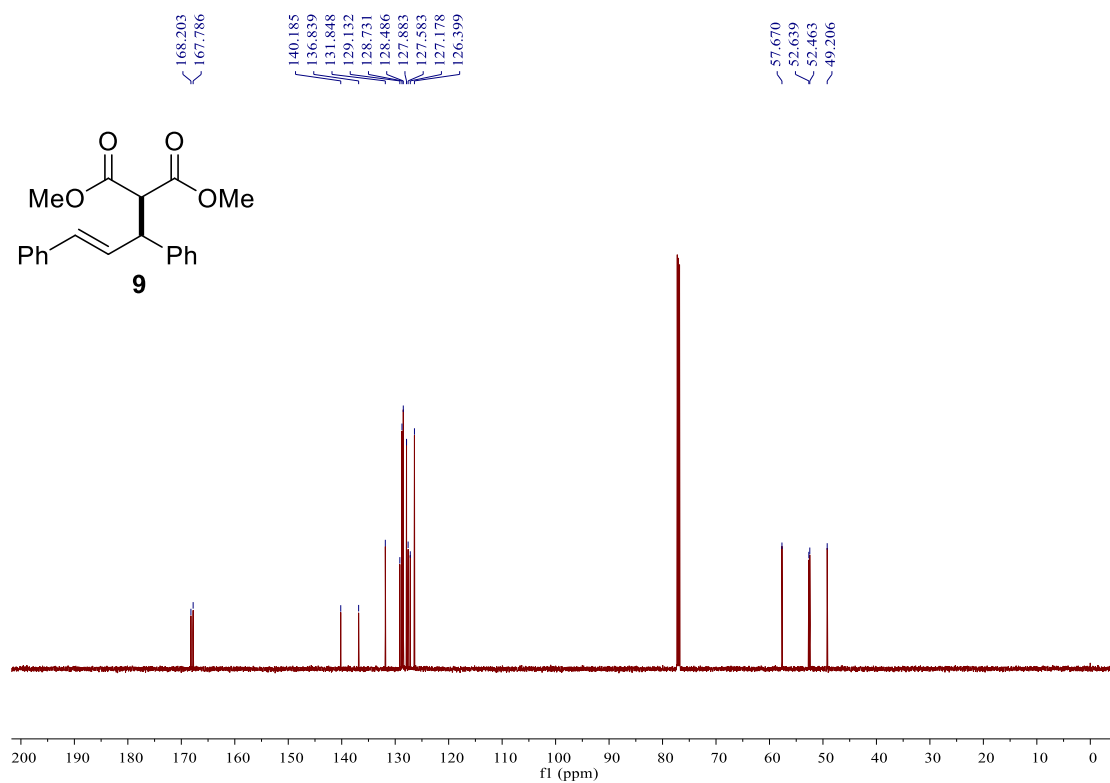

**$^{13}\text{C}$  NMR (150 MHz,  $\text{CDCl}_3$ ) spectrum of 9.**

## IV. Mechanistic Studies

### 4.1 Deuterium labeling experiment

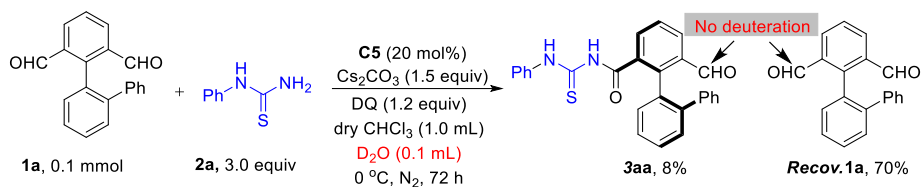

In a nitrogen-filled glovebox, a flame-dried screw-cap reaction tube equipped with a Teflon-coated magnetic stir bar was charged with **C5** (20 mol%, 10.0 mg),  $\text{Cs}_2\text{CO}_3$  (49.0 mg, 1.5 equiv), [1,1':2,1''-terphenyl]-2,6-dicarbaldehyde **1a** (0.1 mmol, 29 mg), anhydrous chloroform (1.0 mL), and  $\text{D}_2\text{O}$  (0.1 mL). The mixture was stirred for 5 minutes, followed by the addition of N-Phenylthiourea **4a** (46.0 mg, 3.0 equiv) and 3,3',5,5'-tetra-*tert*-butyldiphenoquinone (48 mg, 1.2 equiv). Then the tube was sealed with a Thermo Scientific PTFE screw cap equipped with a septum, removed from the glovebox. The reaction mixture was stirred at 0 °C for 72 h. After the reaction was completed as indicated by TLC analysis, the solvent was removed under reduced pressure and the residue was purified by silica gel chromatography using petroleum ether/ethyl acetate 10:3 (v/v) to give the product *R*-**3aa**.

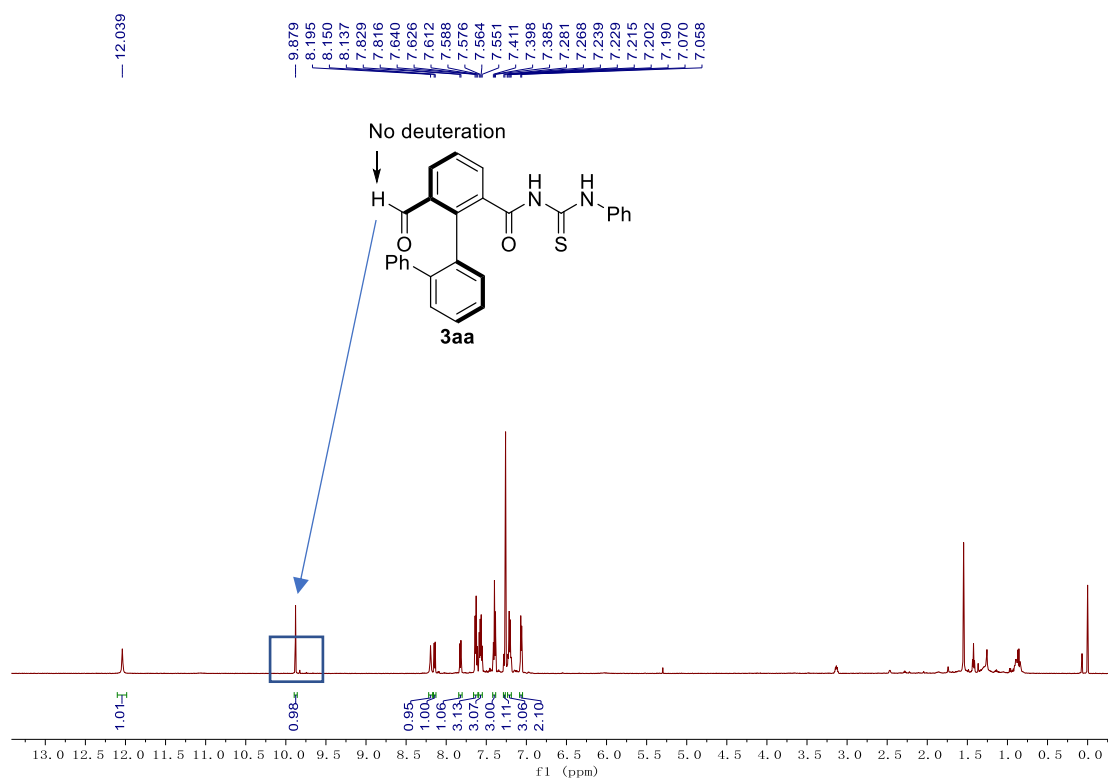

$^1\text{H}$  NMR (600 MHz,  $\text{CDCl}_3$ ) spectrum of **3aa**.



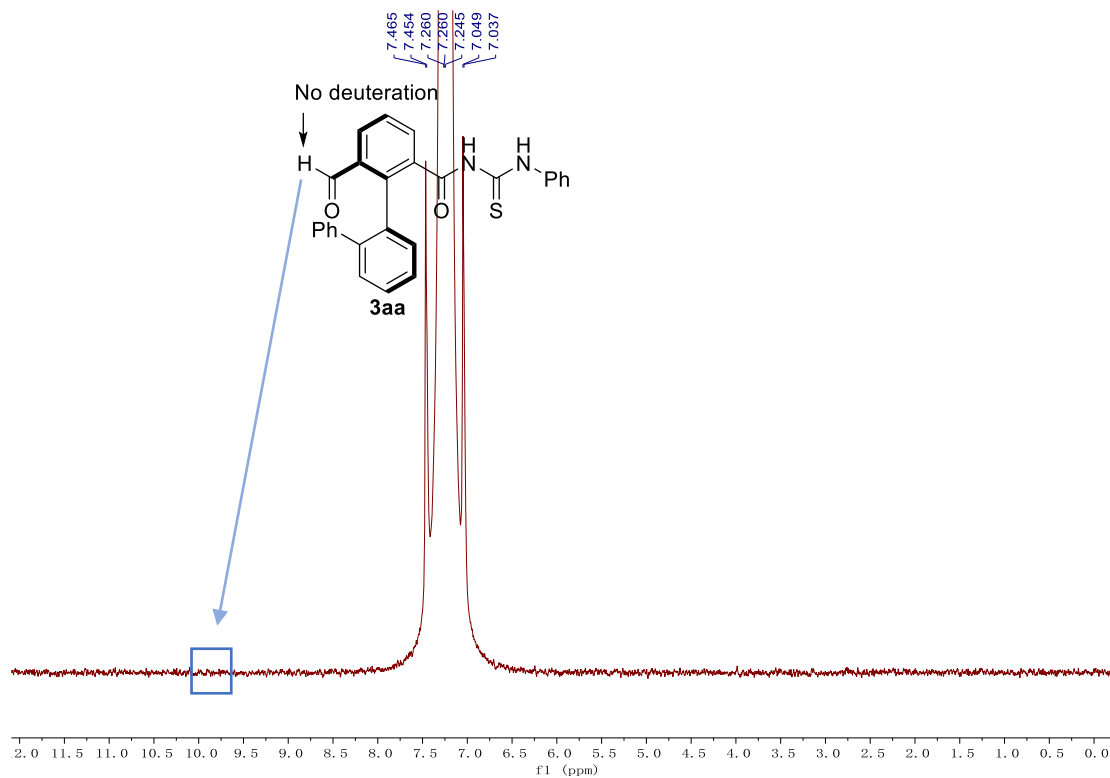

**$^2\text{H}$  NMR (77 MHz,  $\text{CDCl}_3$ ) spectrum of **3aa**.**

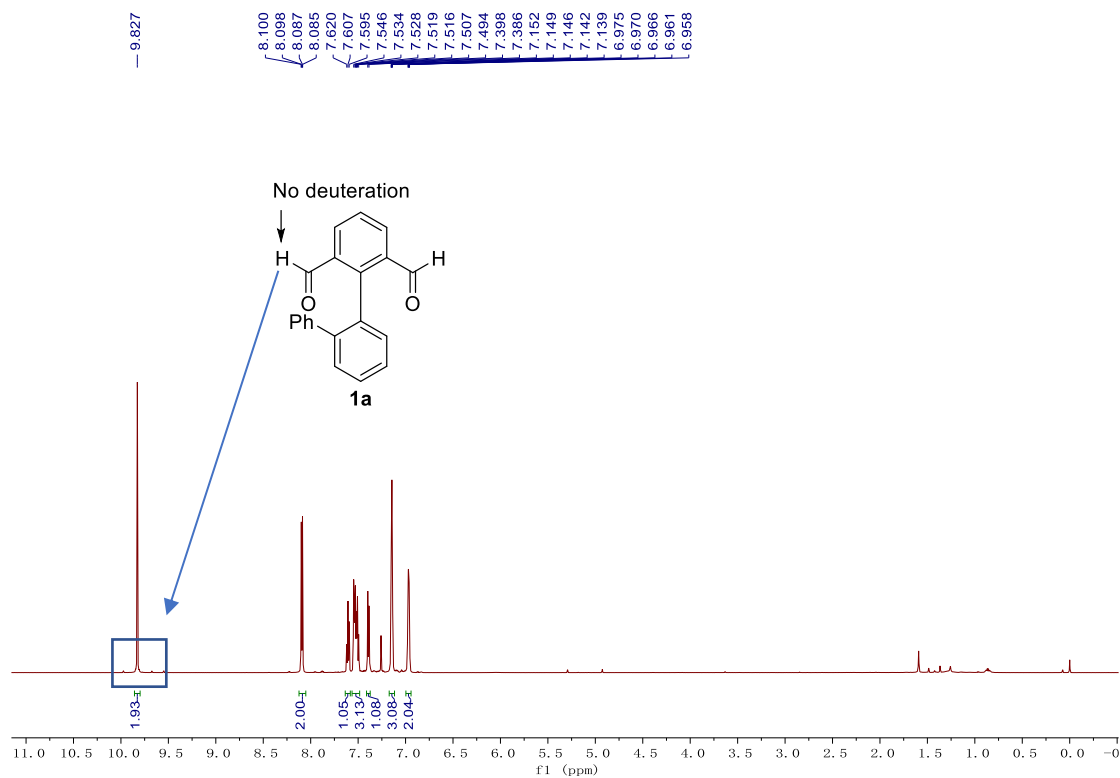

**$^1\text{H}$  NMR (600 MHz,  $\text{CDCl}_3$ ) spectrum of *Recov.* **1a**.**

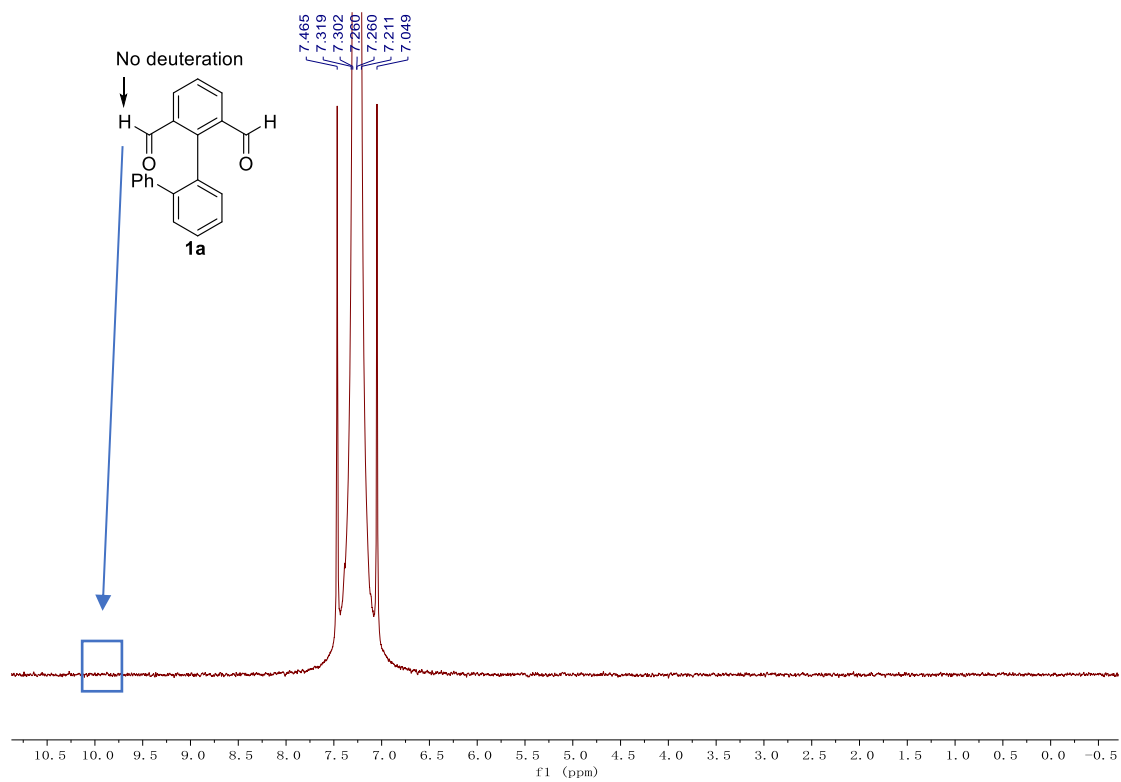

**$^2\text{H}$  NMR (77 MHz,  $\text{CDCl}_3$ ) spectrum of *Recov.* **1a**.**

## 4.2 Parallel Kinetic Isotope Effect Experiment

### 4.2.1 Procedure for synthesis of **1a-d<sub>2</sub>**<sup>[4]</sup>

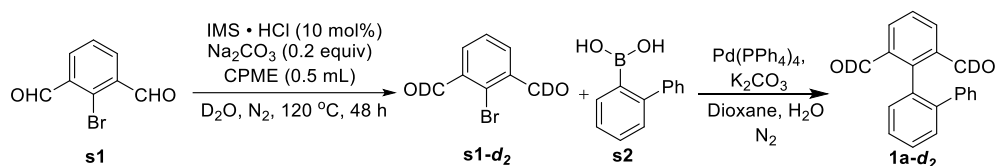

In a nitrogen-filled glovebox, a flame-dried screw-cap reaction tube equipped with a Teflon-coated magnetic stir bar was charged with aldehyde **s1** (0.5 mmol),  $\text{IMes} \cdot \text{HCl}$  (17.0 mg, 0.05 mmol),  $\text{Na}_2\text{CO}_3$  (11.0 mg, 0.1 mmol), CPME (0.5 mL) and  $\text{D}_2\text{O}$  (2.5 mL). Then the tube was sealed with a Thermo Scientific PTFE screw cap equipped with a septum, removed from the glovebox. The reaction mixture was stirred at  $120^\circ\text{C}$  for 48 h, and extracted with AcOEt, and the organic layers were dried over  $\text{MgSO}_4$ , and concentrated in vacuo. The residue was purified by silica gel column chromatography (PE : EA = 10:1), **s1-d<sub>2</sub>** was obtained in 90% yield, with 98% D.

A flame-dried screw-cap reaction tube equipped with a Teflon-coated magnetic stir bar was charged with 2-bromoisophthalaldehyde **s1-d<sub>2</sub>**, 2-biphenylboronic acid **s2** (2.29 equiv),  $\text{K}_2\text{CO}_3$  (6.89 equiv) and  $\text{Pd}(\text{PPh}_3)_4$  (0.018 equiv) and was evacuated and charged with argon three times. Then degassed 1,4-dioxane : water = 7 : 1 were added and the reaction was heated at  $95^\circ\text{C}$  for 3 days under argon atmosphere. After cooling to room temperature, the mixture was poured into water and extracted with DCM three times. The organic layer was washed with brine and dried over anhydrous  $\text{MgSO}_4$ . The solvent was removed under vacuum. The residue was purified by silica gel column chromatography (ethyl acetate : cyclohexane = 1:20 to 1:10) and washed with ethanol to give compound as a white solid (yield: 75 %).  $^1\text{H NMR}$  (500 MHz, Chloroform-*d*)  $\delta$  9.82 (d,  $J = 0.8$  Hz, 0.04 H), 8.10 (d,  $J = 7.7$  Hz, 2H), 7.60 (td,  $J = 7.6, 1.3$  Hz, 1H), 7.55 – 7.49 (m, 3H), 7.39 (dd,  $J = 7.7, 1.3$  Hz, 1H), 7.15 – 7.13 (m, 3H), 6.97 – 6.95 (m, 2H).

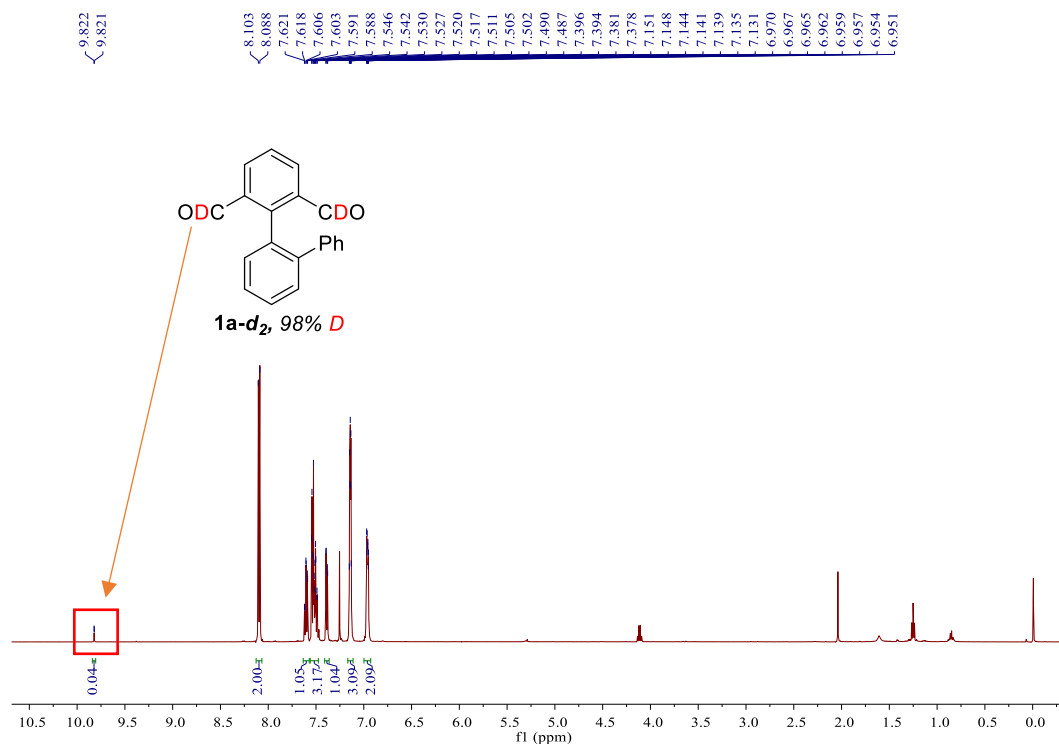

$^1\text{H NMR}$  (500 MHz,  $\text{CDCl}_3$ ) spectrum of **1a-d<sub>2</sub>**.

#### 4.2.2 Experiment Procedure for the Isotope Experiments

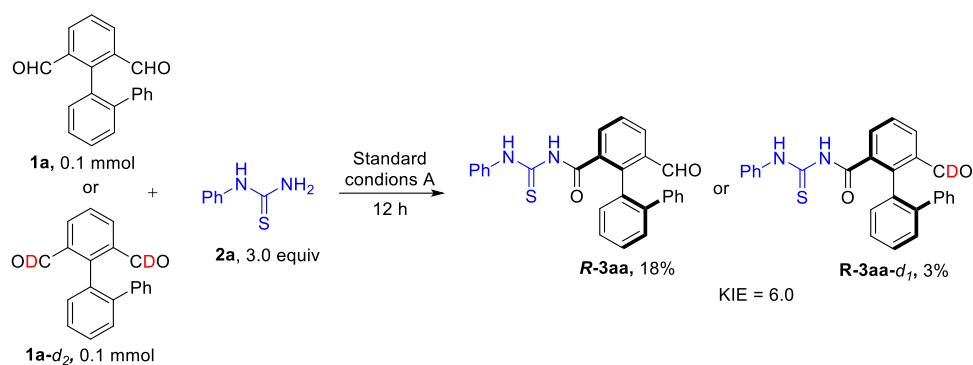

In a nitrogen-filled glovebox, two flame-dried screw-cap reaction tube equipped with a Teflon-coated magnetic stir bar was charged **C5** (20 mol%, 10 mg), Cs<sub>2</sub>CO<sub>3</sub> (49.0 mg, 1.5 equiv), **1a** or **1a-d<sub>2</sub>** (0.1 mmol, 29.0 mg), and anhydrous chloroform (1.0 mL) was added. The mixture was stirred for 5 minutes, followed by the addition of N-Phenylthiourea **2a** (46.0 mg, 3.0 equiv) and 3,3',5,5'-tetra-*tert*-butyldiphenoquinone (48 mg, 1.2 equiv). Then the tube was sealed with a Thermo Scientific PTFE screw cap equipped with a septum, removed from the glovebox. The reaction mixture was stirred at 0 °C for 12 h. After the reaction was completed as indicated by TLC analysis, the solvent was removed under reduced pressure and the residue was purified by silica gel chromatography using petroleum ether/ethyl acetate 10:3 (v/v) to give the product **R-3aa**, yield: 18%; **R-3aa-d<sub>1</sub>**, yield: 3%. The KIE was determined by <sup>1</sup>H NMR analysis to be 6.0.

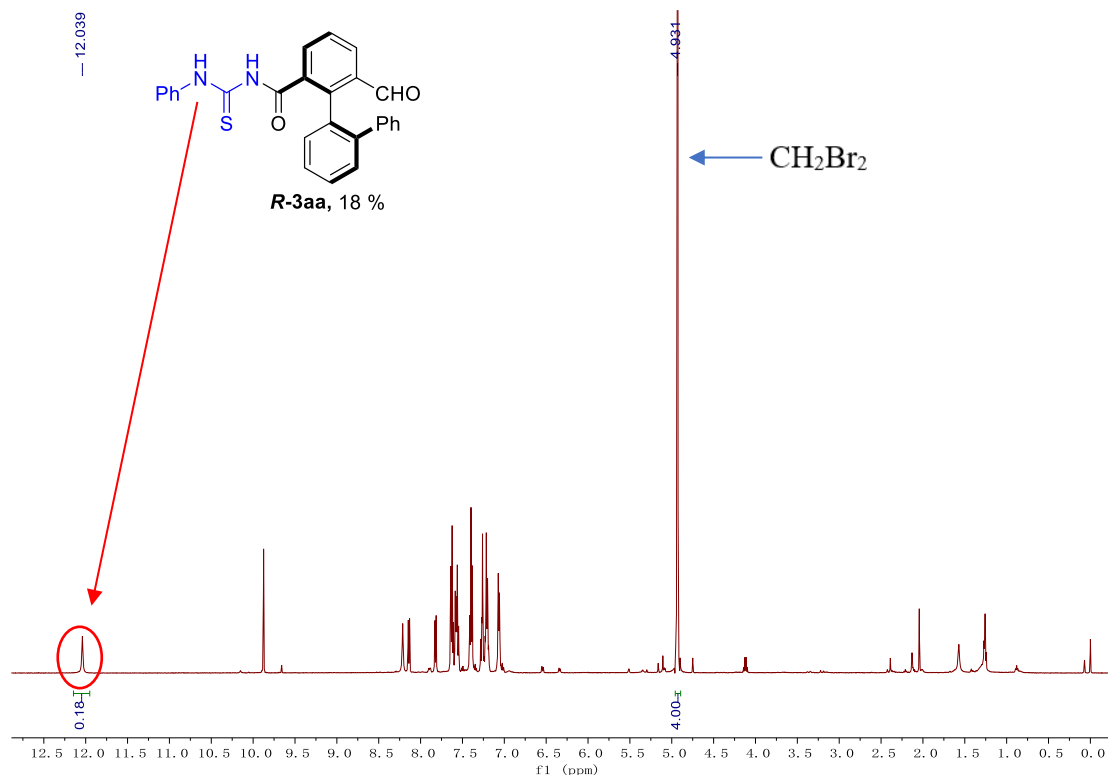

<sup>1</sup>H NMR (600 MHz, CDCl<sub>3</sub>) using CH<sub>2</sub>Br<sub>2</sub> (0.2 mmol, 14.0 μL) as an internal standard of the reaction mixture (**R-3aa**)

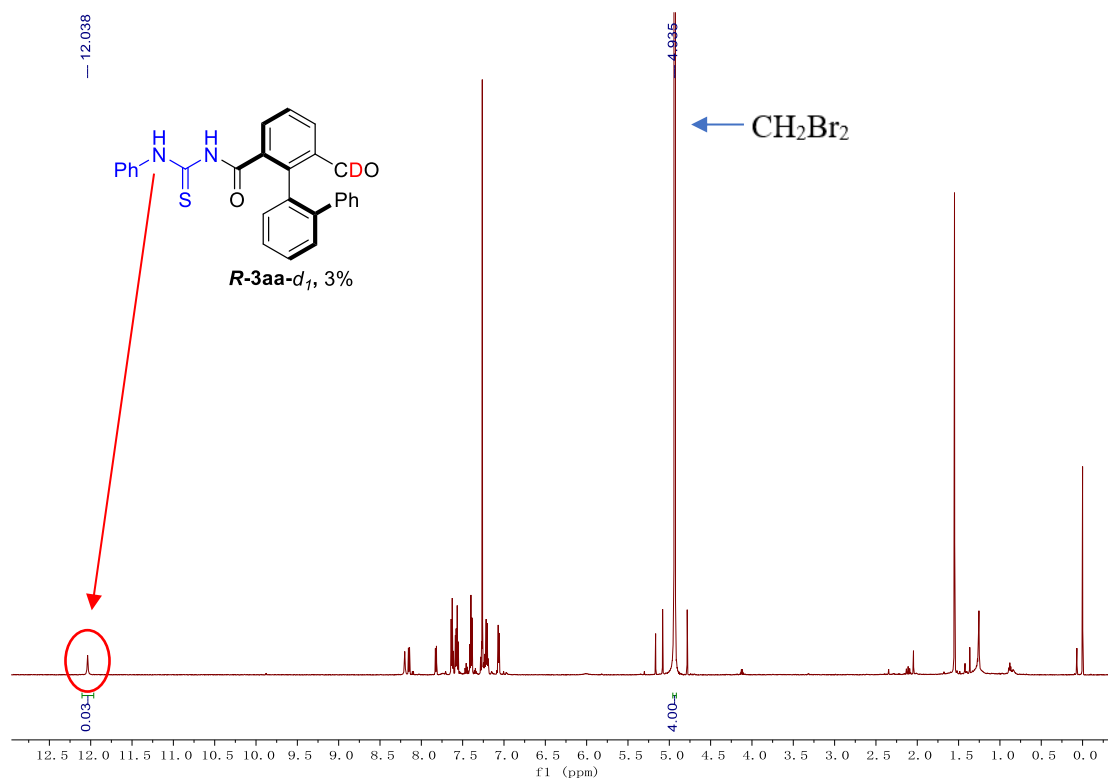

$^1\text{H}$  NMR (600 MHz,  $\text{CDCl}_3$ ) using  $\text{CH}_2\text{Br}_2$  (0.2 mmol, 14.0  $\mu\text{L}$ ) as an internal standard of the reaction mixture (*R*-3aa-*d*<sub>1</sub>)

### 4.3 Control experiment

#### 4.3.1 Investigation on the ee of the initial formed product 3ca

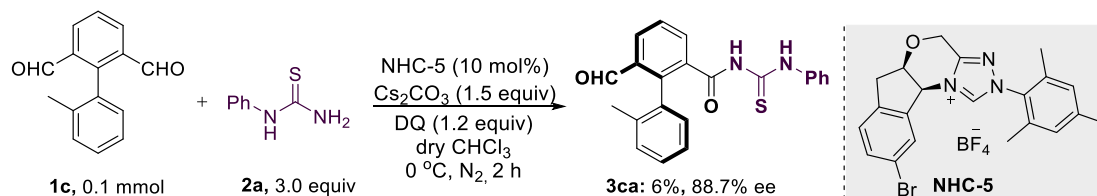

In a nitrogen-filled glovebox, a flame-dried screw-cap reaction tube equipped with a Teflon-coated magnetic stir bar was charged **NHC-5** (10 mol%, 5.0 mg),  $\text{Cs}_2\text{CO}_3$  (49.0 mg, 1.5 equiv), 2'-methyl-[1,1'-biphenyl]-2,6-dicarbaldehyde **1c** (0.1 mmol, 22.4 mg) and anhydrous chloroform (1.0 mL). The mixture was stirred for 5 minutes, followed by the addition of N-Phenylthiourea **2a** (46.0 mg, 3.0 equiv) and 3,3',5,5'-tetra-*tert*-butyldiphenylquinone (48 mg, 1.2 equiv). Then the tube was sealed with a Thermo Scientific PTFE screw cap equipped with a septum, removed from the glovebox. The reaction mixture was stirred at 0 °C for 2 h. After the reaction was completed as indicated by TLC analysis, the solvent was removed under reduced pressure and the residue was purified by silica gel chromatography using petroleum ether/ethyl acetate 10:3 (v/v) to give the product (*R*)-**3ca** (yield: 6%; 88.7% ee).

**HPLC analysis:** Daicel Chiralpak IC-3 column (95:5 hexane: 2-propanol, 1 mL/min, 25 °C, 254 nm);  $t_{\text{R}}$  (major) = 20.11 min,  $t_{\text{R}}$  (minor) = 21.95 min, 88.7% ee.

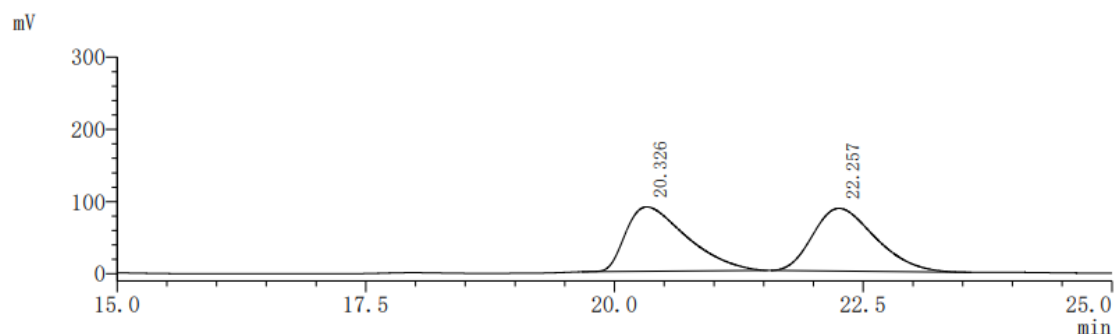

| Peak | PetTime | Type | Width(min) | Area    | Hight | Area%   |
|------|---------|------|------------|---------|-------|---------|
| 1    | 20.326  | M    | 1.1502     | 3787902 | 89213 | 49.9556 |
| 2    | 22.257  | M    | 1.1755     | 3794636 | 86859 | 50.0444 |

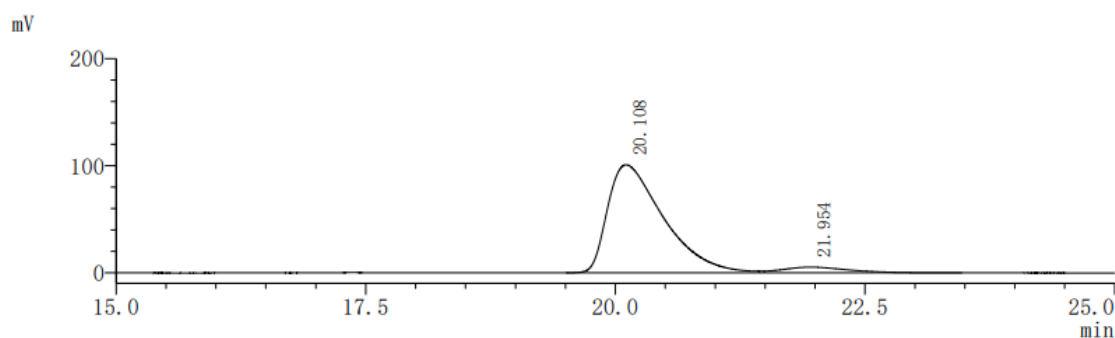

| Peak | PetTime | Type | Width(min) | Area    | Hight  | Area%   |
|------|---------|------|------------|---------|--------|---------|
| 1    | 20.108  | M    | 1.0243     | 3930111 | 100914 | 94.3524 |
| 2    | 21.954  | M    | 1.2033     | 235242  | 5263   | 5.6476  |

#### 4.3.2 Procedure for NHC-catalyzed Desymmetrization of Dialdehyde **1a** with NHC-5.

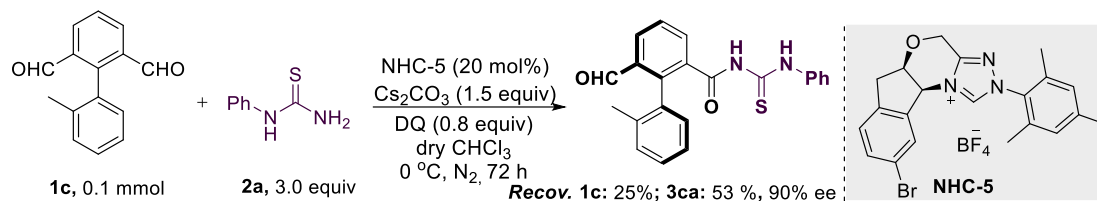

In a nitrogen-filled glovebox, a flame-dried screw-cap reaction tube equipped with a Teflon-coated magnetic stir bar was charged **NHC-5** (20 mol%, 10.0 mg),  $\text{Cs}_2\text{CO}_3$  (49.0 mg, 1.5 equiv), 2'-methyl-[1,1'-biphenyl]-2,6-dicarbaldehyde **1c** (0.1 mmol, 22.4 mg) and anhydrous chloroform (1.0 mL). The mixture was stirred for 5 minutes, followed by the addition of N-Phenylthiourea **2a** (46.0 mg, 3.0 equiv) and 3,3',5,5'-tetra-*tert*-butyldiphenoquinone (32 mg, 0.8 equiv). Then the tube was sealed with a Thermo Scientific PTFE screw cap equipped with a septum, removed from the glovebox. The reaction mixture was stirred at 0 °C for 72 h. After the reaction was completed as indicated by TLC analysis, the solvent was removed under reduced pressure and the residue was purified by silica gel chromatography using petroleum ether/ethyl acetate 10:3 (v/v) to give the product (*R*)-**3ca** (yield: 53%; 90% ee) and **Recov. 1c** (yield: 25%).

**HPLC analysis:** Daicel Chiralpak IC-3 column (95:5 hexane: 2-propanol, 1 mL/min, 25 °C, 254 nm);  $t_{\text{R}}$  (major) = 20.07 min,  $t_{\text{R}}$  (minor) = 21.65 min, 90% ee.

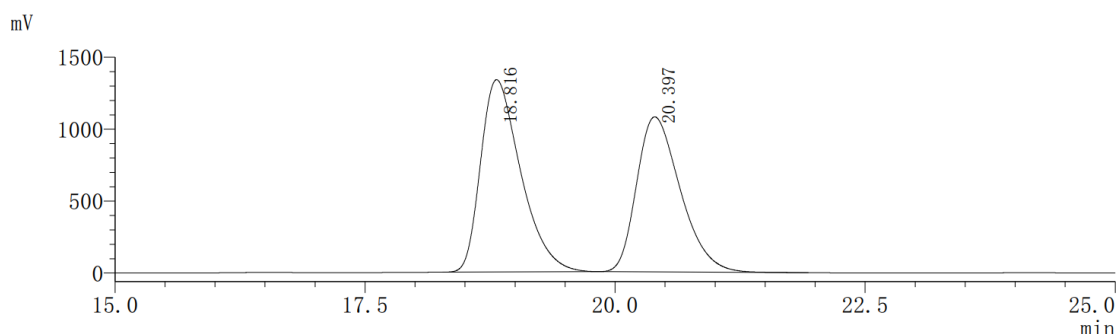

| Peak | PetTime | Type | Width(min) | Area     | Hight   | Area%   |
|------|---------|------|------------|----------|---------|---------|
| 1    | 18.816  | M    | 0.7265     | 37264452 | 1337010 | 53.2226 |
| 2    | 20.397  | M    | 0.7983     | 32751813 | 1077898 | 46.7774 |

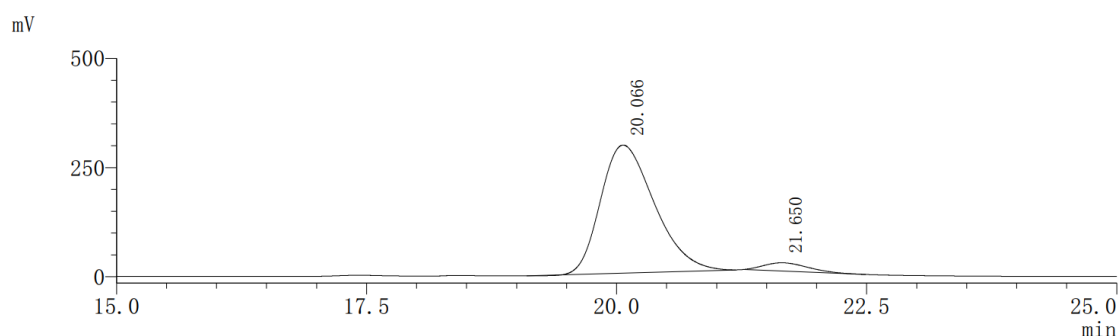

| Peak | PetTime | Type | Width(min) | Area     | Hight  | Area%   |
|------|---------|------|------------|----------|--------|---------|
| 1    | 20.066  | M    | 0.9942     | 10995182 | 293562 | 94.9061 |
| 2    | 21.650  | M    | 0.8275     | 590144   | 19083  | 5.0939  |

#### 4.3.3 General procedure for for NHC-catalyzed kinetic resolution (KR) of (*R*)-**3ca** with *N*-Phenylthiourea and characterization data.

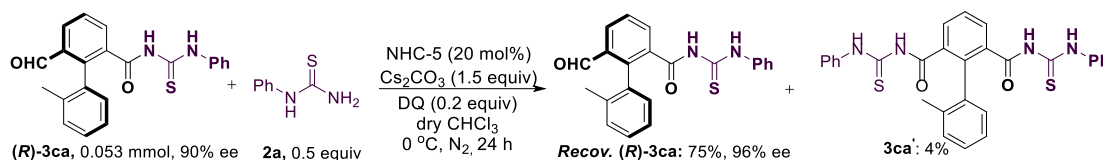

In a nitrogen-filled glovebox, a flame-dried screw-cap reaction tube equipped with a Teflon-coated magnetic stir bar was charged **NHC-5** (20 mol%, 5.3 mg),  $\text{Cs}_2\text{CO}_3$  (26.0 mg, 1.5 equiv), (*R*)-**3ca** (0.053 mmol, 19.83 mg) and anhydrous chloroform (0.5 mL). The mixture was stirred for 5 minutes, followed by the addition of *N*-Phenylthiourea **2a** (4.0 mg, 0.5 equiv) and 3,3',5,5'-tetra-*tert*-butyldiphenylquinone (4.4 mg, 0.2 equiv). Then the tube was sealed with a Thermo Scientific PTFE screw cap equipped with a septum, removed from the glovebox. The reaction mixture was stirred at 0 °C for 24 h. After the reaction was completed as indicated by TLC analysis, the solvent was removed under reduced pressure and the residue was purified by silica gel chromatography using petroleum ether/ethyl acetate 10:3 (v/v) to give the product *Recov. (R)*-**3ca** (yield: 75%; 96% ee) and **3ca'** (yield: 4%).

**HPLC analysis:** Daicel Chiralpak IC-3 column (95:5 hexane: 2-propanol, 1 mL/min, 25 °C, 254 nm);  $t_{\text{R}}$  (major) = 19.80 min,  $t_{\text{R}}$  (minor) = 21.47 min, 96% ee.

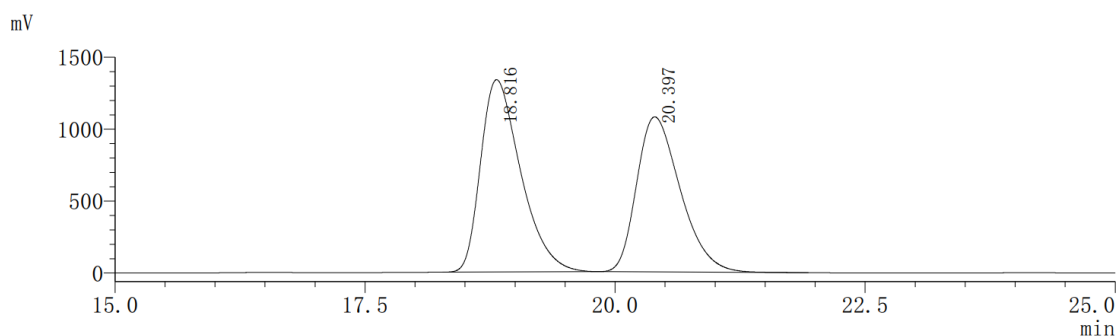

| Peak | PetTime | Type | Width(min) | Area     | Hight   | Area%   |
|------|---------|------|------------|----------|---------|---------|
| 1    | 18.816  | M    | 0.7265     | 37264452 | 1337010 | 53.2226 |
| 2    | 20.397  | M    | 0.7983     | 32751813 | 1077898 | 46.7774 |

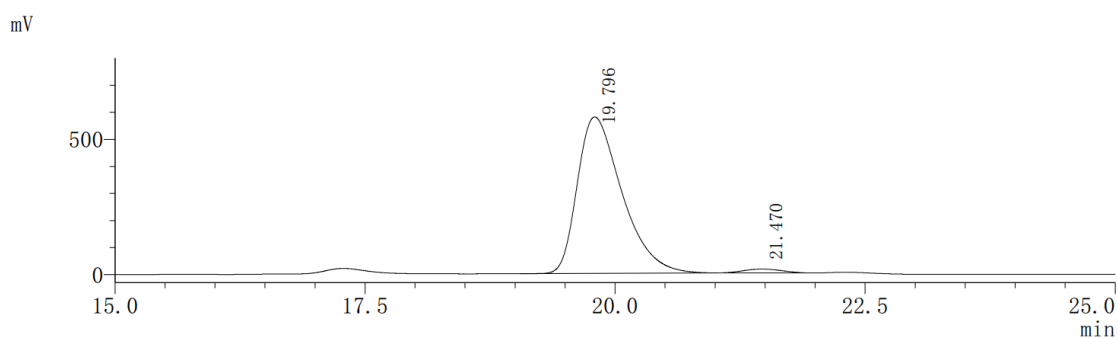

| Peak | PetTime | Type | Width(min) | Area     | Hight  | Area%   |
|------|---------|------|------------|----------|--------|---------|
| 1    | 19.796  | M    | 0.8118     | 17946422 | 578014 | 98.0405 |
| 2    | 21.470  | M    | 0.7045     | 358681   | 13954  | 1.9595  |

**2'-methyl-*N*<sup>2</sup>, *N*<sup>6</sup>-bis(phenylcarbamothioyl)-[1,1'-biphenyl]-2,6-dicarboxamide **3ca**'**

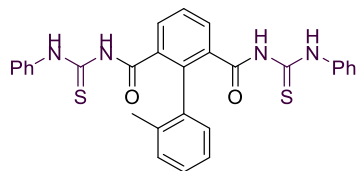

**3ca**: <sup>1</sup>H NMR (500 MHz, Chloroform-*d*) δ 12.06 (s, 2H), 8.47 (s, 2H), 8.06 (d, *J* = 7.9 Hz, 2H), 7.70 (t, *J* = 7.8 Hz, 1H), 7.61 – 7.58 (m, 4H), 7.47 – 7.43 (m, 3H), 7.38 – 7.34 (m, 4H), 7.29 – 7.27 (m, 1H), 7.25 – 7.22 (m, 2H), 2.22 (s, 3H). <sup>13</sup>C NMR (150 MHz, Chloroform-*d*) δ 177.28, 167.09, 138.19, 137.35, 136.12, 134.47, 134.11, 132.40, 132.04, 130.62, 128.90, 128.84, 128.44, 127.81, 126.88, 123.89, 20.01. HRMS (ESI-TOF) (*m/z*): Calcd for C<sub>29</sub>H<sub>24</sub>N<sub>4</sub>NaO<sub>2</sub>S<sub>2</sub>, ([*M* + Na]<sup>+</sup>), 547.1233; found 547.1232.



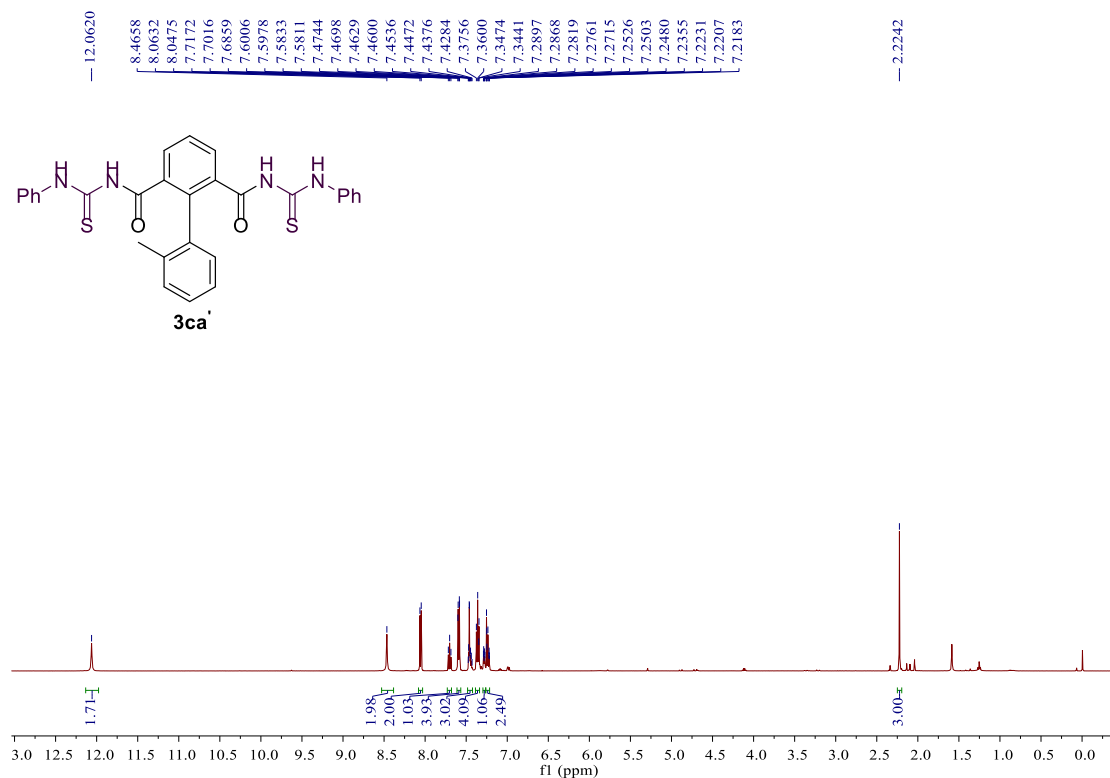

**<sup>1</sup>H NMR (500 MHz, CDCl<sub>3</sub>) spectrum of 3ca'**

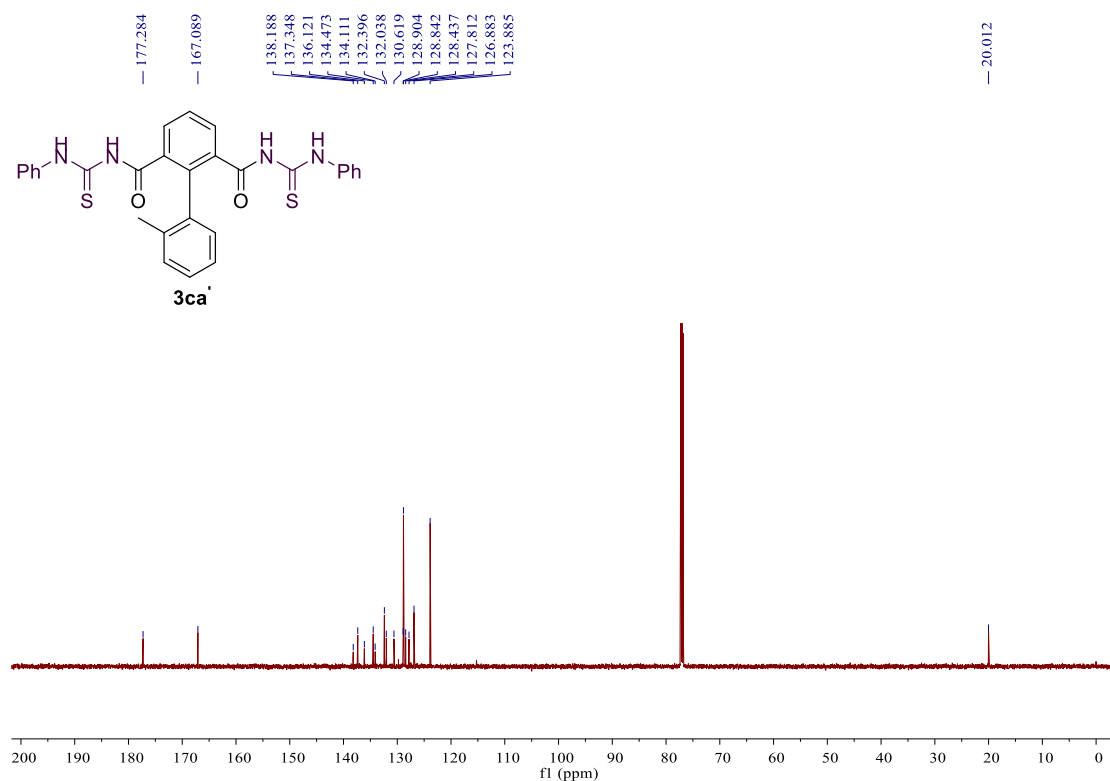

**<sup>13</sup>C NMR (150 MHz, CDCl<sub>3</sub>) spectrum of 3ca'**

#### 4.3.4 Investigation on ee of the product **3ca** by changing the amount of DQ

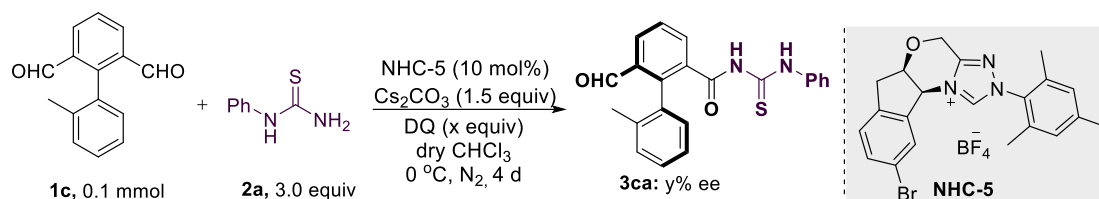

In a nitrogen-filled glovebox, a flame-dried screw-cap reaction tube equipped with a Teflon-coated magnetic stir bar was charged **NHC-5** (10 mol%, 5.0 mg),  $\text{Cs}_2\text{CO}_3$  (49.0 mg, 1.5 equiv), 2'-methyl-[1,1'-biphenyl]-2,6-dicarbaldehyde **1c** (0.1 mmol, 22.4 mg) and anhydrous chloroform (1.0 mL). The mixture was stirred for 5 minutes, followed by the addition of N-Phenylthiourea **2a** (46.0 mg, 3.0 equiv) and 3,3',5,5'-tetra-*tert*-butyldiphenylquinone (x equiv). Then the tube was sealed with a Thermo Scientific PTFE screw cap equipped with a septum, removed from the glovebox. The reaction mixture was stirred at 0 °C for 4 d. After the reaction was completed as indicated by TLC analysis, the solvent was removed under reduced pressure and the residue was purified by silica gel chromatography using petroleum ether/ethyl acetate 10:3 (v/v) to give the product (*R*)-**3ca** (y% ee).

**HPLC analysis:** Daicel Chiralpak IC-3 column (95:5 hexane: 2-propanol, 1 mL/min, 25 °C, 254 nm).

mV

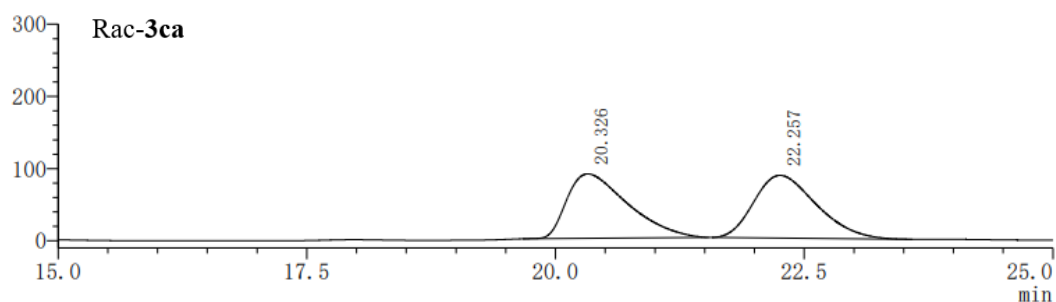

| Peak | PetTime | Type | Width(min) | Area    | Hight | Area%   |
|------|---------|------|------------|---------|-------|---------|
| 1    | 20.326  | M    | 1.1502     | 3787902 | 89213 | 49.9556 |
| 2    | 22.257  | M    | 1.1755     | 3794636 | 86859 | 50.0444 |

mV

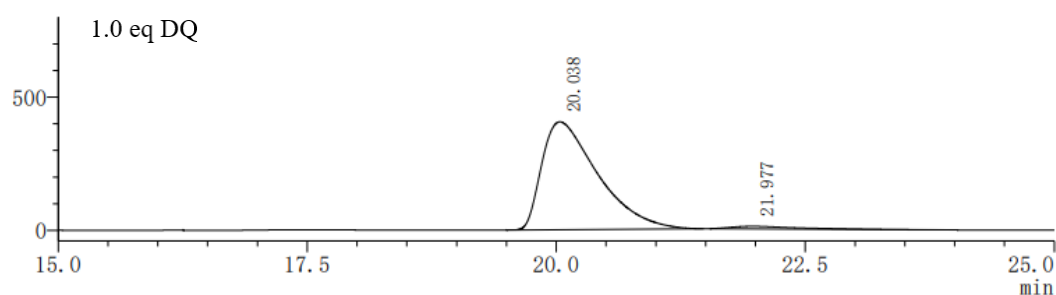

| Peak | PetTime | Type | Width(min) | Area     | Hight  | Area%   |
|------|---------|------|------------|----------|--------|---------|
| 1    | 20.038  | M    | 1.0350     | 15813470 | 404624 | 97.1246 |
| 2    | 21.977  | M    | 1.1853     | 468167   | 9785   | 2.8754  |

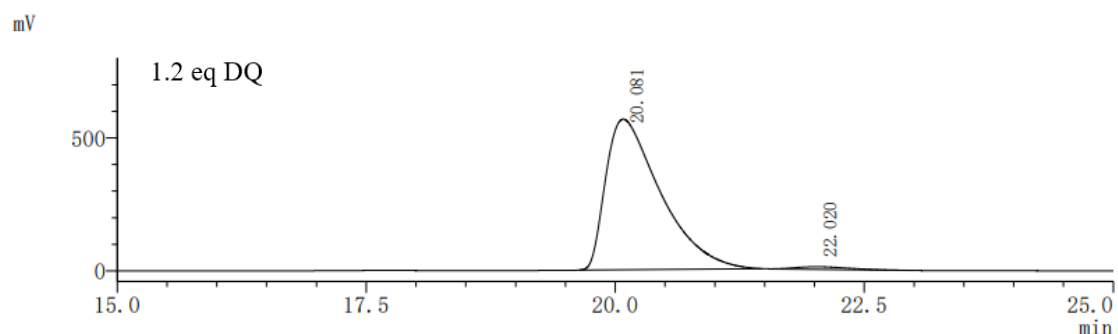

| Peak | PetTime | Type | Width(min) | Area     | Hight  | Area%   |
|------|---------|------|------------|----------|--------|---------|
| 1    | 20.081  | M    | 1.0037     | 21684615 | 566091 | 98.3659 |
| 2    | 22.020  | M    | 1.0016     | 360236   | 9796   | 1.6341  |

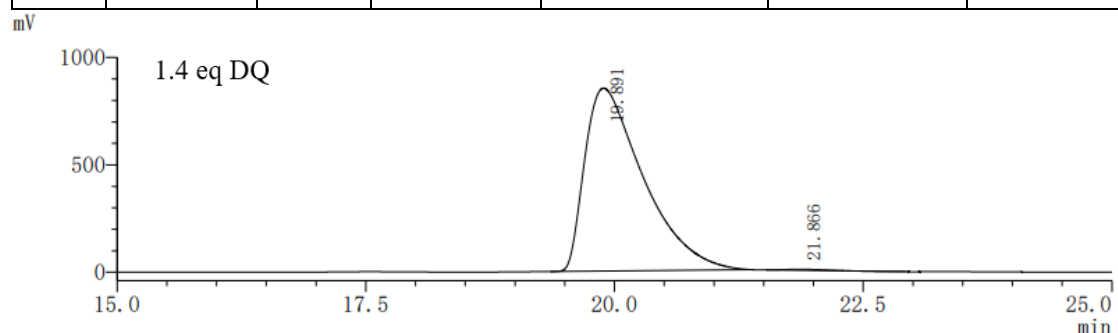

| Peak | PetTime | Type | Width(min) | Area     | Hight  | Area%   |
|------|---------|------|------------|----------|--------|---------|
| 1    | 19.891  | M    | 1.0734     | 34862555 | 851633 | 99.5716 |
| 2    | 21.866  | M    | 0.8383     | 150002   | 4993   | 0.4284  |

#### 4.4 Competing experiment

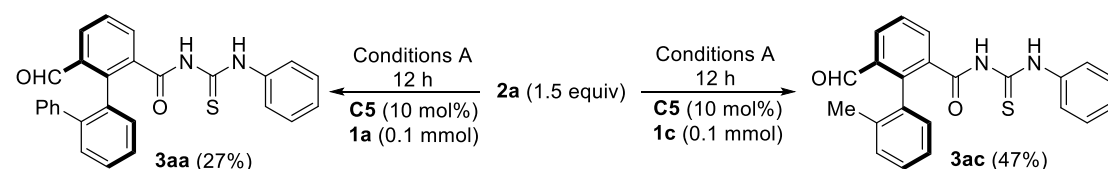

In a nitrogen-filled glovebox, a flame-dried screw-cap reaction tube equipped with a Teflon-coated magnetic stir bar was charged with **C5** (10 mol%, 5.0 mg),  $\text{Cs}_2\text{CO}_3$  (49.0 mg, 1.5 equiv), **1a** (0.1 mmol, 29 mg) or **1c** (0.1 mmol, 22.4 mg), and anhydrous chloroform (1.0 mL). The mixture was stirred for 5 minutes, followed by the addition of N-Phenylthiourea **2a** (23.0 mg, 1.5 equiv) and 3,3',5,5'-tetra-*tert*-butyldiphenoquinone (48 mg, 1.2 equiv). Then the tube was sealed with a Thermo Scientific PTFE screw cap equipped with a septum, removed from the glovebox. The reaction mixture was stirred at 0 °C for 12 h. After the reaction was completed as indicated by TLC analysis, the solvent was removed under reduced pressure and the residue was purified by silica gel chromatography using petroleum ether/ethyl acetate 10:3 (v/v) to give the product **3aa** (yield: 27%); **3ac** (yield: 47%).

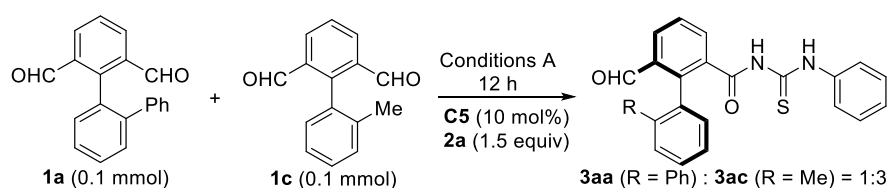

In a nitrogen-filled glovebox, a flame-dried screw-cap reaction tube equipped with a Teflon-coated magnetic stir bar was charged with **C5** (10 mol%, 5.0 mg), Cs<sub>2</sub>CO<sub>3</sub> (49.0 mg, 1.5 equiv), **1a** (0.1 mmol, 29 mg), **1c** (0.1 mmol, 22.4 mg), and anhydrous chloroform (1.0 mL). The mixture was stirred for 5 minutes, followed by the addition of N-Phenylthiourea **2a** (23.0 mg, 1.5 equiv) and 3,3',5,5'-tetra-*tert*-butyldiphenoquinone (48 mg, 1.2 equiv). Then the tube was sealed with a Thermo Scientific PTFE screw cap equipped with a septum, removed from the glovebox. The reaction mixture was stirred at 0 °C for 12 h. After the reaction was completed as indicated by TLC analysis, the solvent was removed under reduced pressure and the residue was purified by silica gel chromatography using petroleum ether/ethyl acetate 10:3 (v/v) to give the product **3aa** (yield: 11%); **3ac** (yield: 34%).

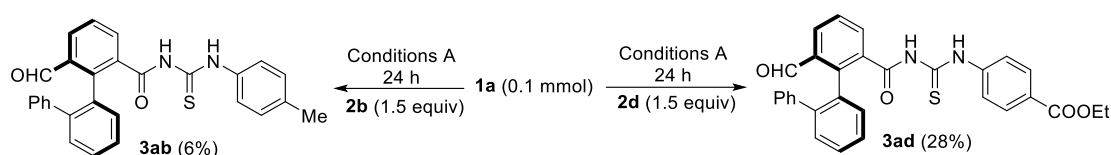

In a nitrogen-filled glovebox, a flame-dried screw-cap reaction tube equipped with a Teflon-coated magnetic stir bar was charged with **C5** (20 mol%, 10.0 mg), Cs<sub>2</sub>CO<sub>3</sub> (49.0 mg, 1.5 equiv), **1a** (0.1 mmol, 29 mg), and anhydrous chloroform (1.0 mL). The mixture was stirred for 5 minutes, followed by the addition of 1-(*p*-tolyl)thiourea **2b** (25.0 mg, 1.5 equiv) or ethyl 4-thioureidobenzoate **2d** (34.0 mg, 1.5 equiv), and 3,3',5,5'-tetra-*tert*-butyldiphenoquinone (48 mg, 1.2 equiv). Then the tube was sealed with a Thermo Scientific PTFE screw cap equipped with a septum, removed from the glovebox. The reaction mixture was stirred at 0 °C for 24 h. After the reaction was completed as indicated by TLC analysis, the solvent was removed under reduced pressure and the residue was purified by silica gel chromatography using petroleum ether/ethyl acetate 10:3 (v/v) to give the product **3ab** (yield: 6%); **3ad** (yield: 28%).

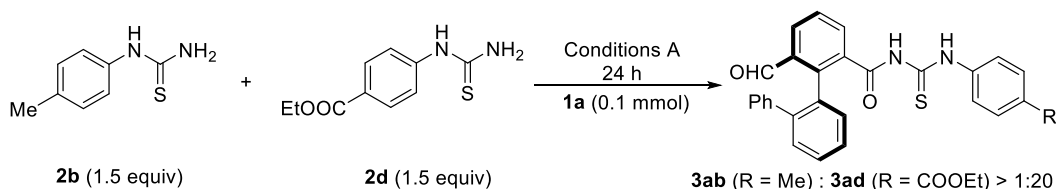

In a nitrogen-filled glovebox, a flame-dried screw-cap reaction tube equipped with a Teflon-coated magnetic stir bar was charged with **C5** (20 mol%, 10.0 mg), Cs<sub>2</sub>CO<sub>3</sub> (49.0 mg, 1.5 equiv), **1a** (0.1 mmol, 29 mg), and anhydrous chloroform (1.0 mL). The mixture was stirred for 5 minutes, followed by the addition of 1-(*p*-tolyl)thiourea **2b** (25.0 mg, 1.5 equiv), ethyl 4-thioureidobenzoate **2d** (34.0 mg, 1.5 equiv), and 3,3',5,5'-tetra-*tert*-butyldiphenoquinone (48 mg, 1.2 equiv). Then the tube was sealed with a Thermo Scientific PTFE screw cap equipped with a septum, removed from the glovebox. The reaction mixture was stirred at 0 °C for 24 h. After the reaction was completed as indicated by TLC analysis, the solvent was removed under reduced pressure and the residue was purified by silica gel chromatography using petroleum ether/ethyl acetate 10:3 (v/v) to give the product **3ab** (n.d.); **3ad** (yield: 29%).

### V Determination of Rotational Barrier and half-life for C-C Bond.<sup>[5]</sup>

Following the procedure of Curran,<sup>[5c]</sup> compound **3aa** (5 mg) was dissolved in toluene (5 mL) to make a 1 mg/mL solution in a sealed tube. The tube was kept in a pre-equilibrated metal bath maintained at 90 °C. At 60 min time intervals, the sealed tube was taken out briefly (1-2 min) from the metal bath and a 70 µL aliquot was diluted with <sup>4</sup>PrOH (0.5 mL) taken out via syringe and injected onto the analytical HPLC column to determine the er. This er was plotted against time, and the barrier to rotation was calculated from the plot. In the y-axis of the graph, “m” stands for the % of the minor enantiomer, and “M” denotes the % of the major enantiomer. All the data have been recorded at 363.15 K (90 °C). The rate value can be inserted into **Equation 2** to give  $\Delta G^{\ddagger}_{363.15\text{ K}}$  and into **Equation 1** to give the half-life to racemisation.  $k_B$  = Boltzmann’s constant [ $1.381 \times 10^{-23}\text{ J K}^{-1}$ ],

T = temperature in K,

h = Planck’s constant [ $6.626 \times 10^{-34}\text{ J s}$ ],

R = gas constant [ $8.3145\text{ J mol}^{-1}$ ].

Then the simplified equation for racemization is:

$$\ln [(M + m) / (M - m)] = k_{\text{rac}}t + c = 2k_{\text{rot}}t + c$$

$$k_{\text{rot}} = (\text{slope}/2)$$

$$t_{1/2\text{rac}} = \ln(2)/k_{\text{rac}} \quad \text{Equation 1}$$

The experimental data is shown for **3aa** below:

| Time (min) | % of major enantiomer (M) | % of minor enantiomer (m) | M + m | M - m   | (M + m) / (M - m) | $\ln [(M + m) / (M - m)]$ |
|------------|---------------------------|---------------------------|-------|---------|-------------------|---------------------------|
| 0          | 98.2154                   | 1.7846                    | 100   | 96.4308 | 1.03701           | 0.036342                  |
| 60         | 97.0695                   | 2.9305                    | 100   | 94.1390 | 1.06226           | 0.060399                  |
| 120        | 95.9186                   | 4.0814                    | 100   | 91.8372 | 1.08888           | 0.085150                  |
| 180        | 94.8148                   | 5.1852                    | 100   | 89.6296 | 1.11570           | 0.109482                  |
| 240        | 93.6251                   | 6.3749                    | 100   | 87.2502 | 1.14613           | 0.136391                  |
| 300        | 92.6179                   | 7.3821                    | 100   | 85.2358 | 1.17322           | 0.159752                  |
| 360        | 91.5662                   | 8.4338                    | 100   | 83.1324 | 1.20290           | 0.184735                  |
| 420        | 90.6864                   | 9.3136                    | 100   | 81.3728 | 1.22891           | 0.206128                  |
| 480        | 89.5789                   | 10.4211                   | 100   | 79.1578 | 1.26330           | 0.233727                  |
| 540        | 88.2218                   | 11.7782                   | 100   | 76.4436 | 1.30815           | 0.268614                  |
| 600        | 87.2411                   | 12.7589                   | 100   | 74.4822 | 1.34260           | 0.294608                  |
| 660        | 86.2777                   | 13.7223                   | 100   | 72.5554 | 1.37826           | 0.320822                  |
| 720        | 85.1850                   | 14.8150                   | 100   | 70.3700 | 1.42106           | 0.351403                  |
| 780        | 84.1910                   | 15.8090                   | 100   | 68.3820 | 1.46237           | 0.380058                  |
| 840        | 83.3540                   | 16.6460                   | 100   | 66.7080 | 1.49907           | 0.404845                  |

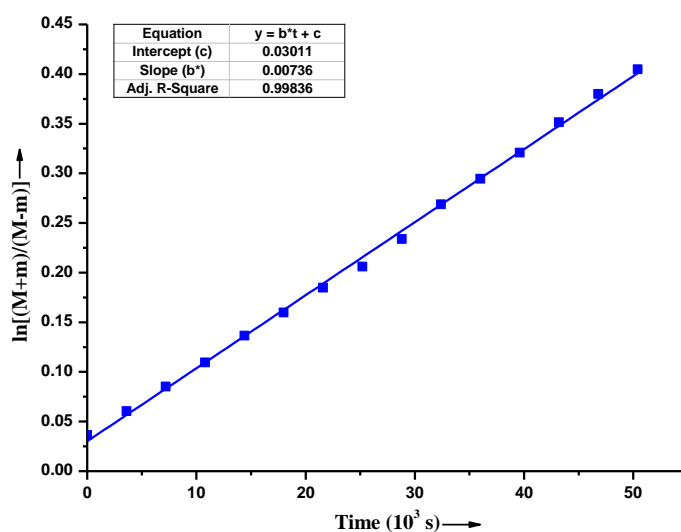

Figure S2. Plot for the Determination of Rotational Barrier and Half-Life for C-C Bond in **3aa**.

So, from plot,  $k_{\text{rot}} = [(0.00736 \times 10^{-3})/2] = 3.68 \times 10^{-6} \text{ s}^{-1}$

$$k_{\text{rot}}^{\ddagger} = [(k_{\text{rot}} \times h)/k_{\text{B}}T] = 0.486 \times 10^{-18}$$

$$\Delta G_{\text{rot}}^{\ddagger} = -RT \ln k_{\text{rot}}^{\ddagger} \quad \text{Equation 2}$$

$$= 127.323 \text{ kJ/mol} = 30.4 \text{ kcal/mol}$$

$$t_{1/2\text{rac}} = \ln(2)/k_{\text{rac}} = 26.16 \text{ h}$$

#### HPLC data for the Analysis of C-C Bond Rotational Barrier:

**HPLC analysis:** Daicel Chiralpak OD-3 column (95:5 hexane: 2-propanol, 1 mL/min, 25 °C, 254 nm)

mV

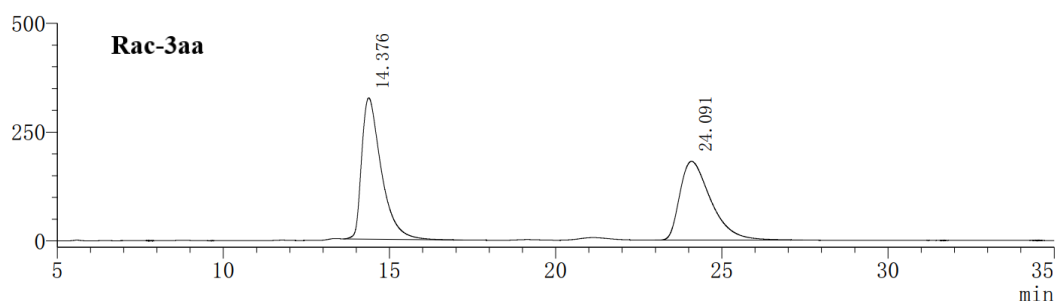

| Peak | PetTime | Type | Width(min) | Area     | Hight  | Area%   |
|------|---------|------|------------|----------|--------|---------|
| 1    | 14.376  | M    | 1.0422     | 13350854 | 325016 | 53.1707 |
| 2    | 24.091  | M    | 1.6871     | 11758587 | 181154 | 46.8293 |

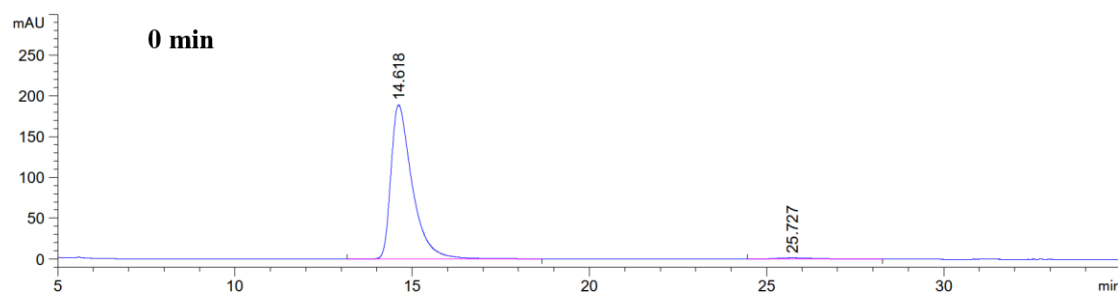

| Peak | PetTime | Type | Width(min) | Area(mAU*S) | Hight(mAU) | Area%   |
|------|---------|------|------------|-------------|------------|---------|
| 1    | 14.618  | BB   | 0.6242     | 7912.22314  | 189.06305  | 98.2154 |

|   |        |    |        |           |         |        |
|---|--------|----|--------|-----------|---------|--------|
| 2 | 25.727 | BB | 0.9687 | 143.76436 | 1.74594 | 1.7846 |
|---|--------|----|--------|-----------|---------|--------|

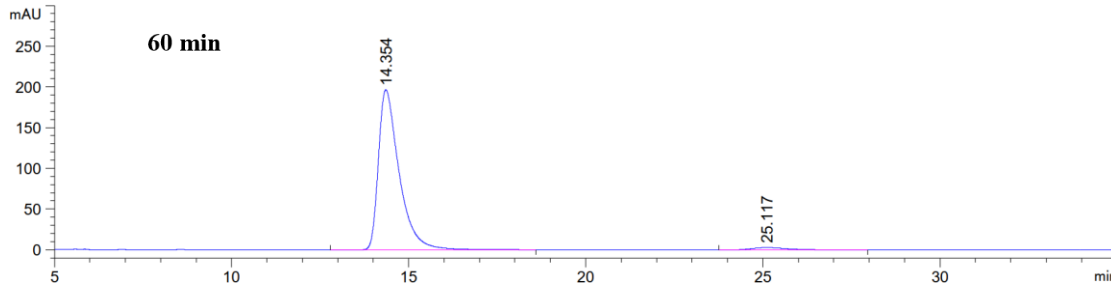

| Peak | PetTime | Type | Width(min) | Area(mAU*S) | Hight(mAU) | Area%   |
|------|---------|------|------------|-------------|------------|---------|
| 1    | 14.354  | BB   | 0.6055     | 8040.97168  | 196.85754  | 97.0695 |
| 2    | 25.117  | BB   | 1.0361     | 242.75339   | 3.04498    | 2.9305  |

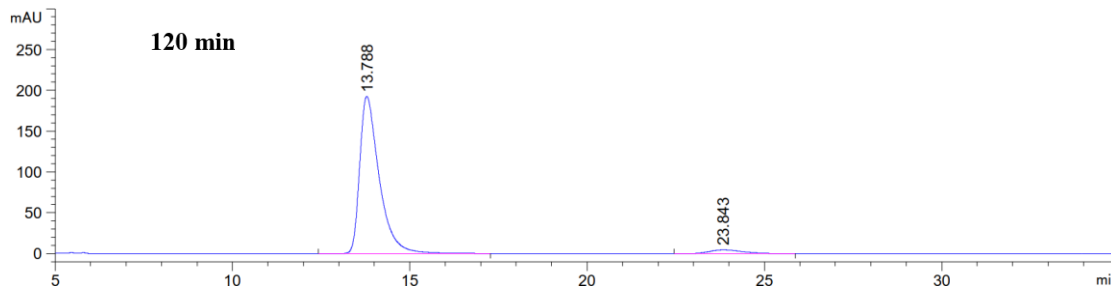

| Peak | PetTime | Type | Width(min) | Area(mAU*S) | Hight(mAU) | Area%   |
|------|---------|------|------------|-------------|------------|---------|
| 1    | 13.788  | BB   | 0.5697     | 7385.20410  | 192.86766  | 95.9186 |
| 2    | 23.843  | BB   | 0.9357     | 314.24542   | 4.66026    | 4.0814  |

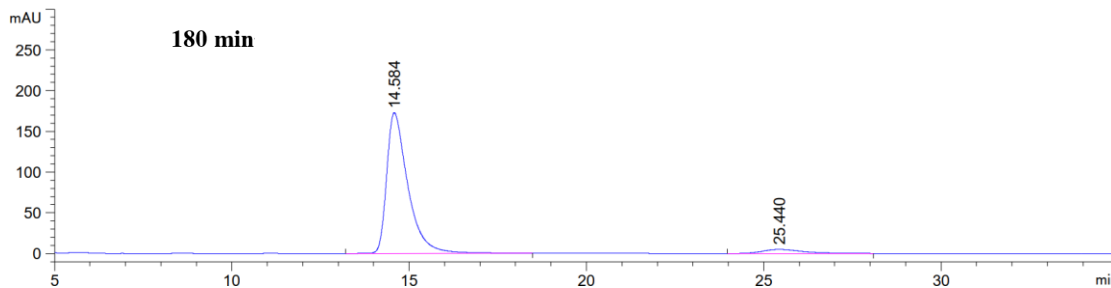

| Peak | PetTime | Type | Width(min) | Area(mAU*S) | Hight(mAU) | Area%   |
|------|---------|------|------------|-------------|------------|---------|
| 1    | 14.584  | BB   | 0.6142     | 7170.65723  | 172.77100  | 94.8148 |
| 2    | 25.440  | BB   | 0.9646     | 392.14893   | 5.00757    | 5.1852  |

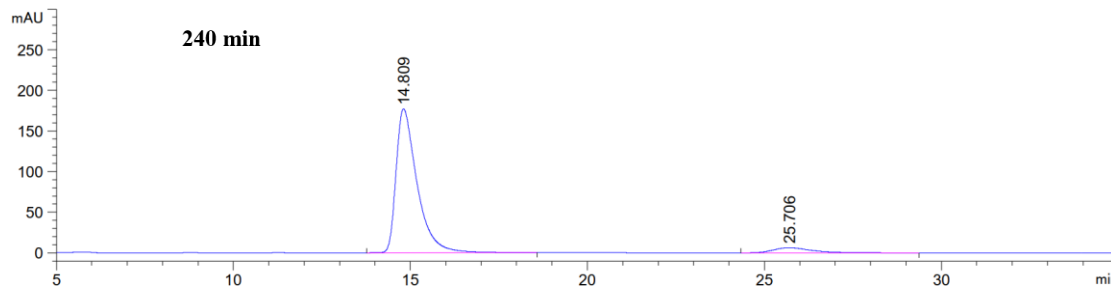

| Peak | PetTime | Type | Width(min) | Area(mAU*S) | Hight(mAU) | Area%   |
|------|---------|------|------------|-------------|------------|---------|
| 1    | 14.809  | BB   | 0.6154     | 7309.73096  | 177.13809  | 93.6251 |

|   |        |    |        |           |         |        |
|---|--------|----|--------|-----------|---------|--------|
| 2 | 25.706 | BB | 1.0469 | 497.71701 | 6.45283 | 6.3749 |
|---|--------|----|--------|-----------|---------|--------|

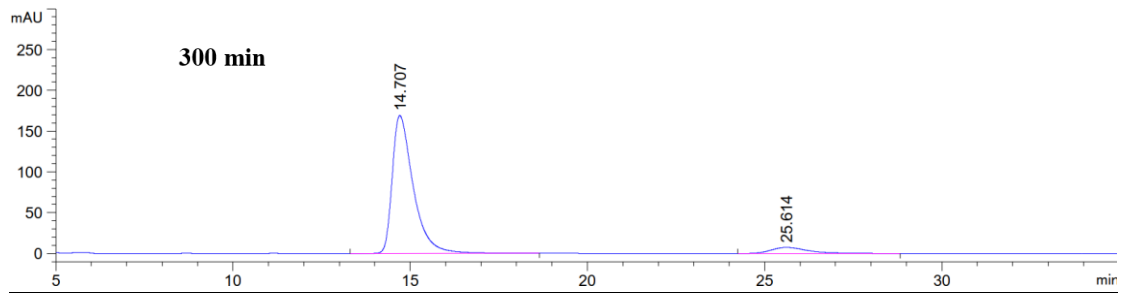

| Peak | PetTime | Type | Width(min) | Area(mAU*S) | Hight(mAU) | Area%   |
|------|---------|------|------------|-------------|------------|---------|
| 1    | 14.707  | BB   | 0.6210     | 6991.26270  | 169.23021  | 92.6179 |
| 2    | 25.614  | BB   | 1.0437     | 557.23962   | 7.58856    | 7.3821  |

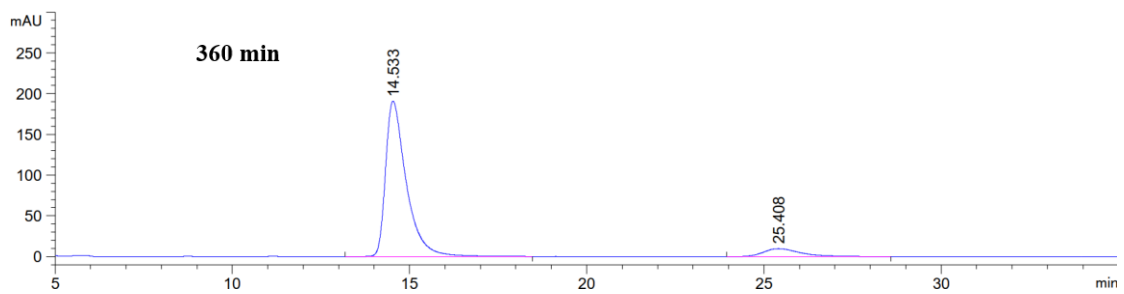

| Peak | PetTime | Type | Width(min) | Area(mAU*S) | Hight(mAU) | Area%   |
|------|---------|------|------------|-------------|------------|---------|
| 1    | 14.533  | BB   | 0.6048     | 7756.63428  | 191.00586  | 91.5662 |
| 2    | 25.408  | BB   | 1.0515     | 714.43402   | 9.73142    | 8.4338  |

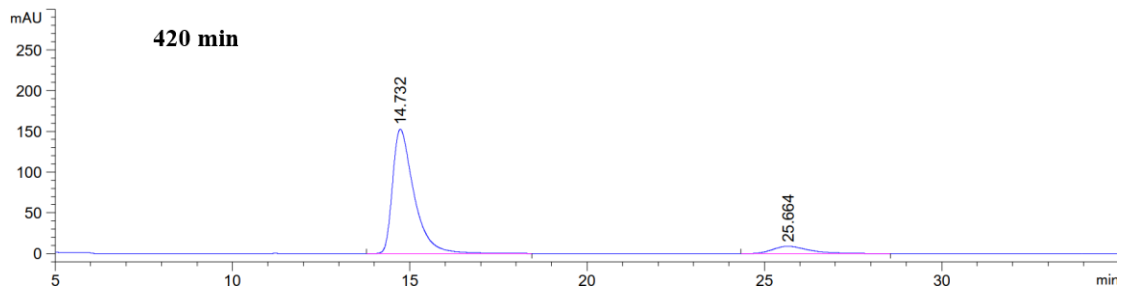

| Peak | PetTime | Type | Width(min) | Area(mAU*S) | Hight(mAU) | Area%   |
|------|---------|------|------------|-------------|------------|---------|
| 1    | 14.732  | BB   | 0.6259     | 6417.58740  | 152.84164  | 90.6864 |
| 2    | 25.664  | BB   | 1.0275     | 659.09027   | 8.96764    | 9.3136  |

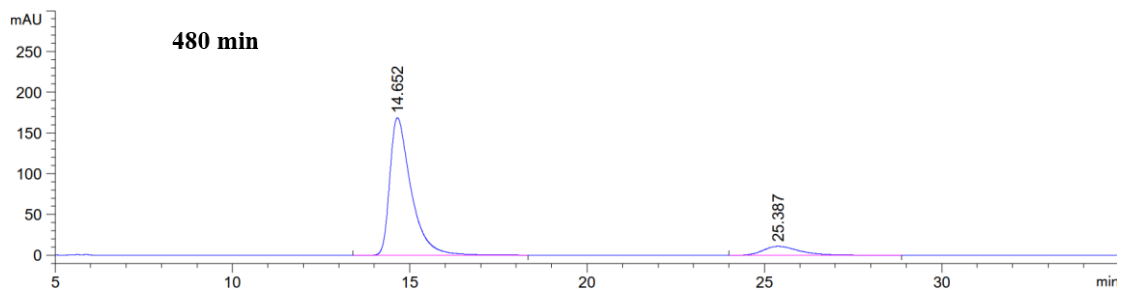

| Peak | PetTime | Type | Width(min) | Area(mAU*S) | Hight(mAU) | Area%   |
|------|---------|------|------------|-------------|------------|---------|
| 1    | 14.652  | BB   | 0.6197     | 7060.84717  | 168.90300  | 89.5789 |



|   |        |    |        |           |          |         |
|---|--------|----|--------|-----------|----------|---------|
| 2 | 25.387 | BB | 1.0511 | 821.42194 | 11.14206 | 10.4211 |
|---|--------|----|--------|-----------|----------|---------|

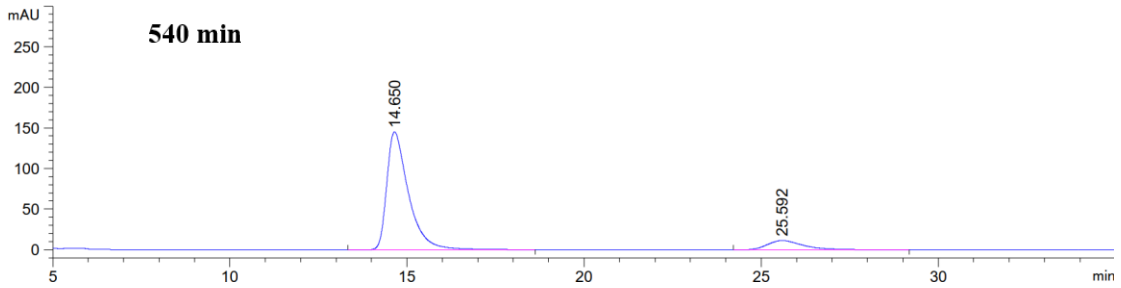

| Peak | PetTime | Type | Width(min) | Area(mAU*S) | Hight(mAU) | Area%   |
|------|---------|------|------------|-------------|------------|---------|
| 1    | 14.650  | BB   | 0.6318     | 6214.73340  | 145.35599  | 88.2218 |
| 2    | 25.592  | BB   | 1.0148     | 829.70807   | 11.47188   | 11.7782 |

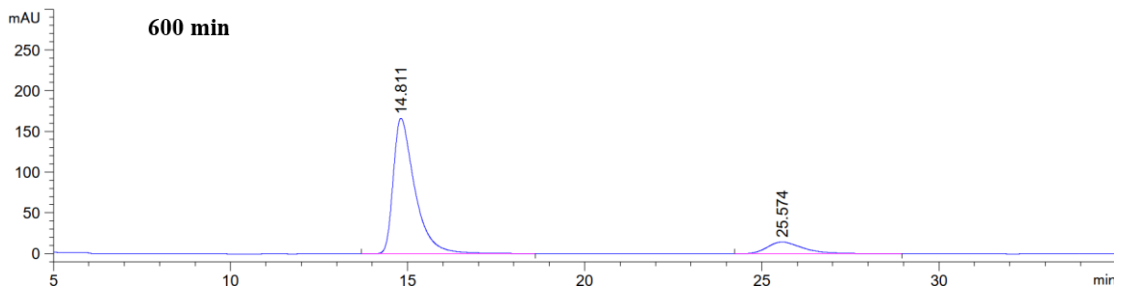

| Peak | PetTime | Type | Width(min) | Area(mAU*S) | Hight(mAU) | Area%   |
|------|---------|------|------------|-------------|------------|---------|
| 1    | 14.811  | BB   | 0.6294     | 7061.96240  | 166.29501  | 87.2411 |
| 2    | 25.574  | BB   | 1.0257     | 1032.80542  | 14.43577   | 12.7589 |

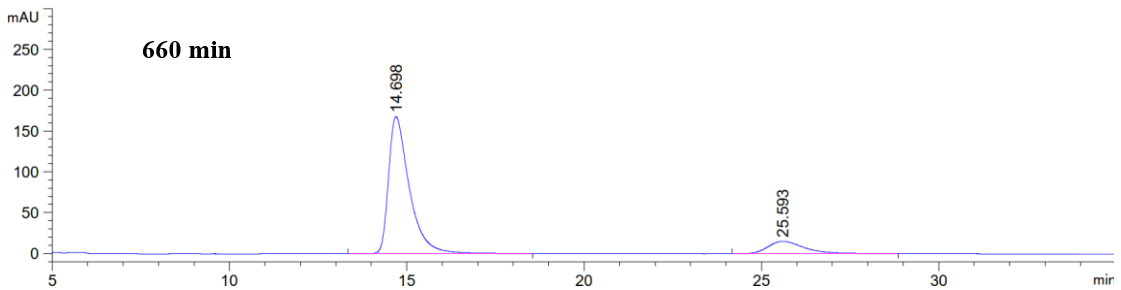

| Peak | PetTime | Type | Width(min) | Area(mAU*S) | Hight(mAU) | Area%   |
|------|---------|------|------------|-------------|------------|---------|
| 1    | 14.698  | BB   | 0.6081     | 6860.38525  | 168.11638  | 86.2777 |
| 2    | 25.593  | BB   | 1.0608     | 1091.13000  | 15.23152   | 13.7223 |

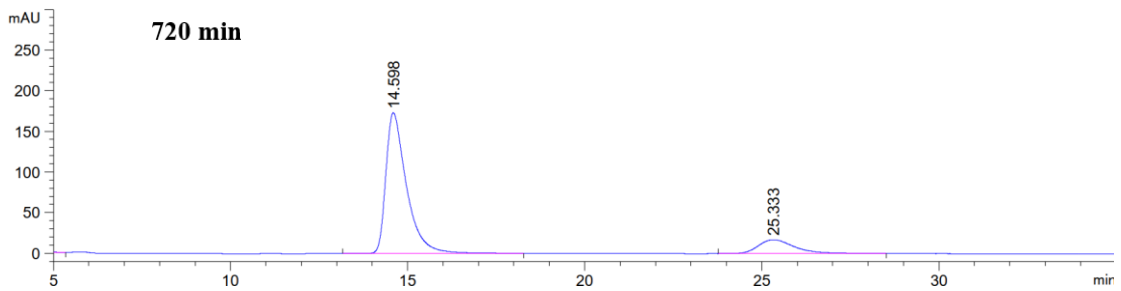

| Peak | PetTime | Type | Width(min) | Area(mAU*S) | Hight(mAU) | Area%   |
|------|---------|------|------------|-------------|------------|---------|
| 1    | 14.598  | BB   | 0.6030     | 7042.47168  | 173.32211  | 85.1850 |

|   |        |    |        |            |          |         |
|---|--------|----|--------|------------|----------|---------|
| 2 | 25.333 | BB | 1.0673 | 1224.77905 | 17.06495 | 14.8150 |
|---|--------|----|--------|------------|----------|---------|

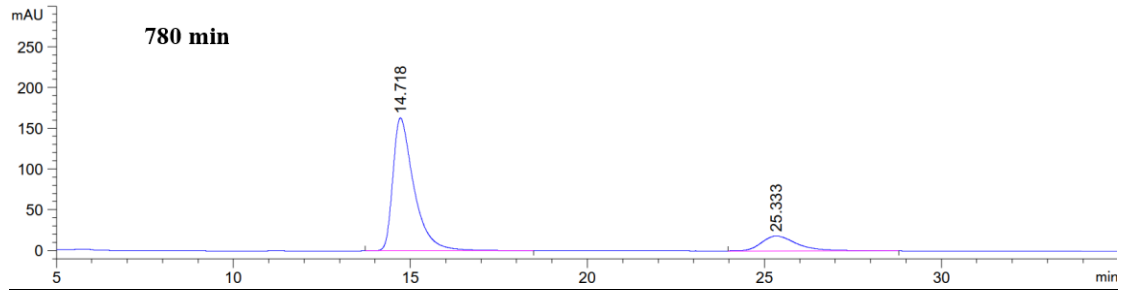

| Peak | PetTime | Type | Width(min) | Area(mAU*S) | Hight(mAU) | Area%   |
|------|---------|------|------------|-------------|------------|---------|
| 1    | 14.718  | BB   | 0.6165     | 6761.50049  | 163.14734  | 84.1910 |
| 2    | 25.333  | BB   | 1.0560     | 1269.64514  | 18.17545   | 15.8090 |

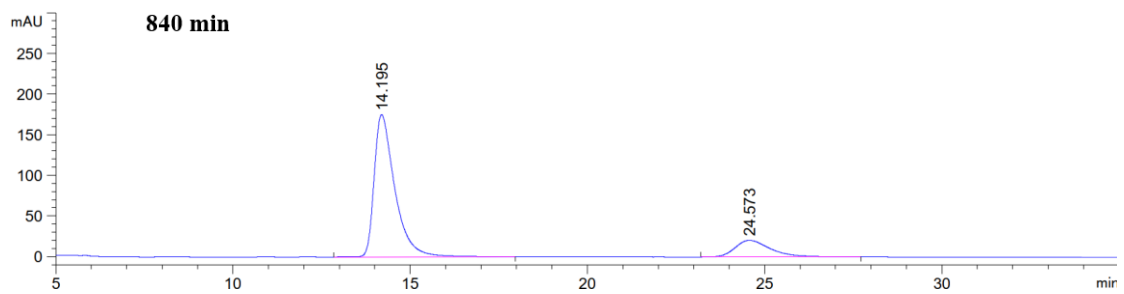

| Peak | PetTime | Type | Width(min) | Area(mAU*S) | Hight(mAU) | Area%   |
|------|---------|------|------------|-------------|------------|---------|
| 1    | 14.195  | BB   | 0.6052     | 7086.54688  | 175.08601  | 83.3540 |
| 2    | 24.573  | BB   | 1.0276     | 1415.20117  | 20.39286   | 16.6460 |

## VI. X-Ray Crystallographic Data

A single crystal of **3ah** suitable for X-ray crystallography was obtained by crystallization *via* evaporation from its hexane/*i*PrOH solution. And the crystal structure of compound **3ah** has been deposited at the Cambridge Crystallographic Data Centre (CCDC 2223845).

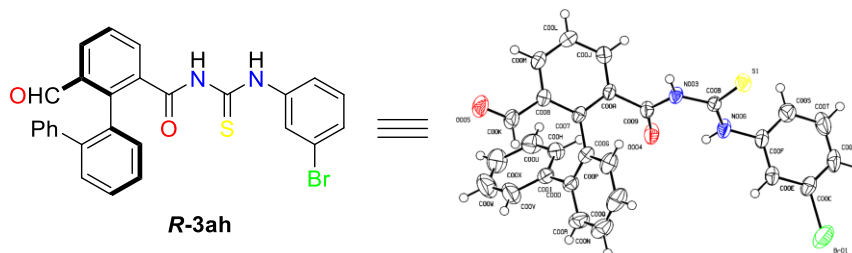

Bond precision: C-C = 0.0080 Å Wavelength = 1.54178  
 Cell: a = 9.2241(8) b = 10.399(1) c = 25.056(2)  
 alpha = 90 beta = 90 gamma = 90  
 Temperature: 287 K Crystal system: orthorhombic Radiation: CuK $\alpha$  ( $\lambda$  = 1.54178)  
 Crystal size/mm<sup>3</sup>: 0.30 × 0.25 × 0.25 Index ranges: -10 ≤ h ≤ 9, -6 ≤ k ≤ 11, -29 ≤ l ≤ 29  
 Independent reflections: 3816 [R<sub>int</sub> = 0.0313, R<sub>sigma</sub> = 0.0394]

|                                     | Calculated                                                        | Reported                                                                                     |
|-------------------------------------|-------------------------------------------------------------------|----------------------------------------------------------------------------------------------|
| Volume                              | 2403.4(4)                                                         | 2403.4(4)                                                                                    |
| Space group                         | P 21 21 21                                                        | P 21 21 21                                                                                   |
| Hall group                          | P 2ac 2ab                                                         | P 2ac 2ab                                                                                    |
| Moiety formula                      | C <sub>27</sub> H <sub>19</sub> BrN <sub>2</sub> O <sub>2</sub> S | 2(C <sub>27</sub> H <sub>19</sub> BrN <sub>2</sub> O <sub>2</sub> S)                         |
| Sum formula                         | C <sub>27</sub> H <sub>19</sub> BrN <sub>2</sub> O <sub>2</sub> S | C <sub>54</sub> H <sub>38</sub> Br <sub>2</sub> N <sub>4</sub> O <sub>4</sub> S <sub>2</sub> |
| Mr                                  | 515.40                                                            | 1030.82                                                                                      |
| D <sub>x</sub> , g cm <sup>-3</sup> | 1.424                                                             | 1.424                                                                                        |
| Z                                   | 4                                                                 | 2                                                                                            |
| Mu (mm <sup>-1</sup> )              | 3.356                                                             | 3.356                                                                                        |
| F <sub>000</sub>                    | 1048.0                                                            | 1048.0                                                                                       |
| F <sub>000</sub> <sup>o</sup>       | 1049.09                                                           |                                                                                              |
| h, k, lmax                          | 10, 12, 29                                                        | 10, 11, 29                                                                                   |
| Nref                                | 3979 [ 2290]                                                      | 3816                                                                                         |
| T <sub>min</sub> , T <sub>max</sub> | 0.420, 0.432                                                      |                                                                                              |
| T <sub>min</sub> <sup>o</sup>       | 0.318                                                             |                                                                                              |

Correction method= Not given

Data completeness = 1.67/0.96

R(reflections) = 0.0436 (3609)

S = 1.071

Flack parameter

Theta(max) = 63.862

wR<sub>2</sub>(reflections) = 0.1150 (3816)

N<sub>par</sub> = 298

0.092(10)

## VII. References

- [1] J. I. Urgel, M. D. Giovannantonio, K. Eimre, T. G. Lohr, J. Liu, S. Mishra, Q. Sun, A. Kinikar, R. Widmer, S. Stolz, M. Bommert, R. Berger, P. Ruffieux, C. A. Pignedoli, K. Mullen, X. Feng and R. Fasel, On-Surface Synthesis of Cumulene-Containing Polymers via Two-Step Dehalogenative Homocoupling of Dibromomethylene-Functionalized Tribenzoazulene, *Angew. Chem., Int. Ed.*, 2020, **59**, 13281-13287.
- [2] (a) T. Fukuzumi and J. W. Bode, A Reagent for the Convenient, Solid-Phase Synthesis of N-Terminal Peptide Hydroxylamines for Chemoselective Ligations, *J. Am. Chem. Soc.*, 2009, **131**, 3864-3865; (b) S. Staniland, B. Yuan, N. Gimnez-Agull, T. Marcelli, S. C. Willies, D. M. Grainger, N. J. Turner and J. Clayden, Enzymatic Desymmetrising Redox Reactions for the Asymmetric Synthesis of Biaryl Atropisomers, *Chem. Eur. J.*, 2014, **20**, 13084-13088.
- [3] C. Rodríguez-Franco, E. Roldán-Molina, A. Aguirre-Medina, R. Fernández, V. Hornillos and J. M. Lassaletta, Catalytic Atroposelective Synthesis of C–N Axially Chiral Aminophosphines via Dynamic Kinetic Resolution, *Angew. Chem., Int. Ed.*, 2024, **63**, e202409524.
- [4] Y. Sawama, Y. Miki and H. Sajiki, N-Heterocyclic Carbene Catalyzed Deuteration of Aldehydes in D<sub>2</sub>O, *Synlett*, 2020, **31**, 699-702.
- [5] (a) S. Staniland, R. W. Adams, J. J. W. McDouall, I. Maffucci, A. Contini, D. M. Grainger, N. J. Turner and J. Clayden, Biocatalytic Dynamic Kinetic Resolution for the Synthesis of Atropisomeric Biaryl N-Oxide Lewis Base Catalysts, *Angew. Chem., Int. Ed.*, 2016, **55**, 10755-10759; (b) S. Barik, S. Shee, S. Das, R. G. Gonnade, G. Jindal, S. Mukherjee and A. T. Biju, NHC-Catalyzed Desymmetrization of N-Aryl Maleimides Leading to the Atroposelective Synthesis of N-Aryl Succinimides, *Angew. Chem., Int. Ed.*, 2021, **60**, 12264-12268; (c) D. B. Guthrie and D. P. Curran, Asymmetric Radical and Anionic Cyclizations of Axially Chiral Carbamates, *Org. Lett.*, 2009, **11**, 249.

### VIII. $^1\text{H}$ , $^{13}\text{C}$ , $^{19}\text{F}$ , $^{31}\text{P}$ NMR Spectra of New Compounds.

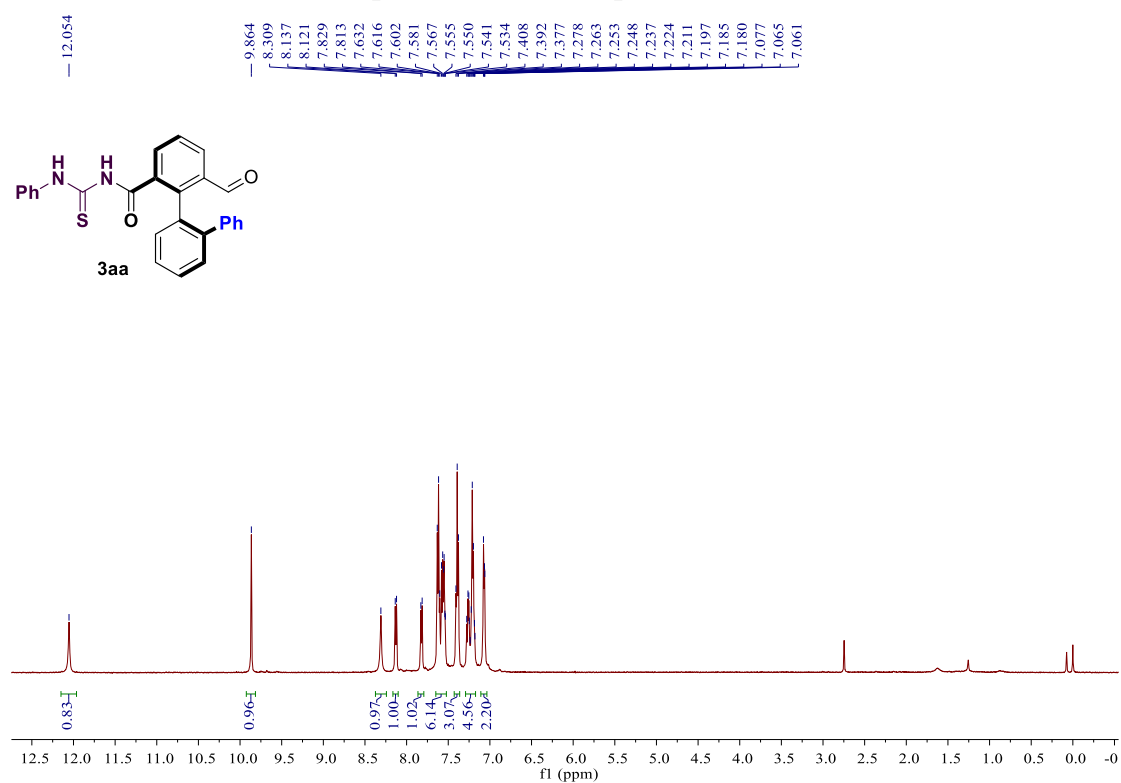

**$^1\text{H}$  NMR (500 MHz,  $\text{CDCl}_3$ ) spectrum of 3aa.**

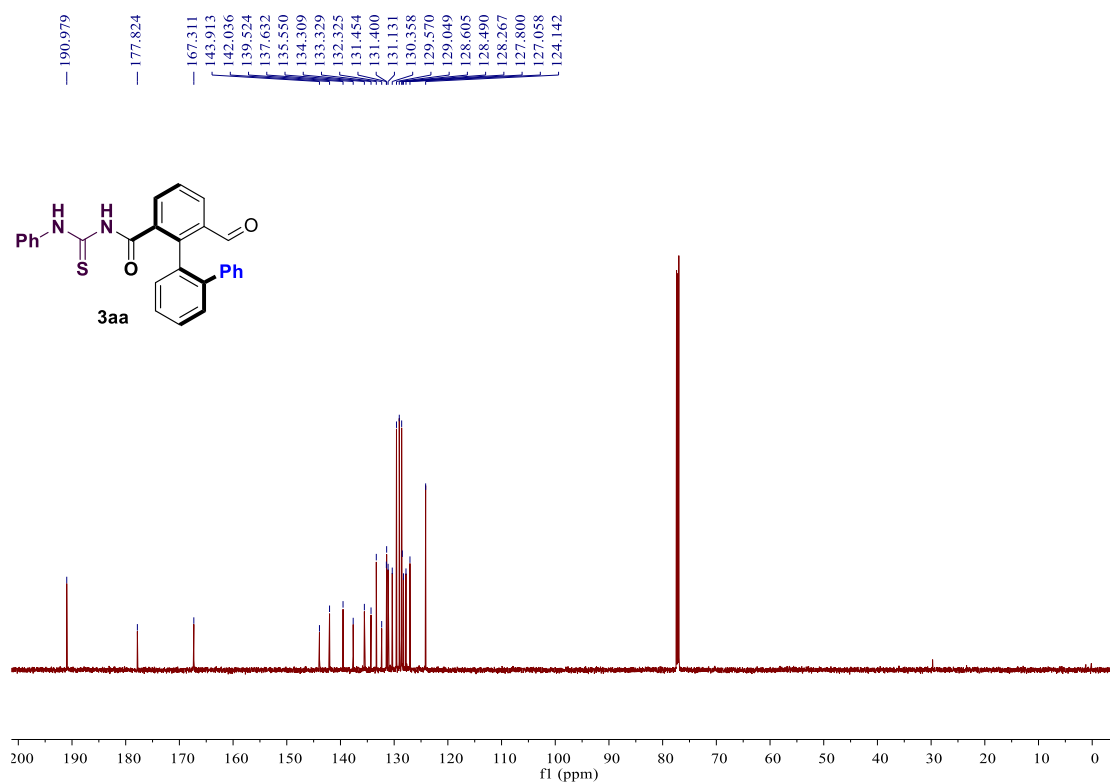

**$^{13}\text{C}$  NMR (150 MHz,  $\text{CDCl}_3$ ) spectrum of 3aa.**

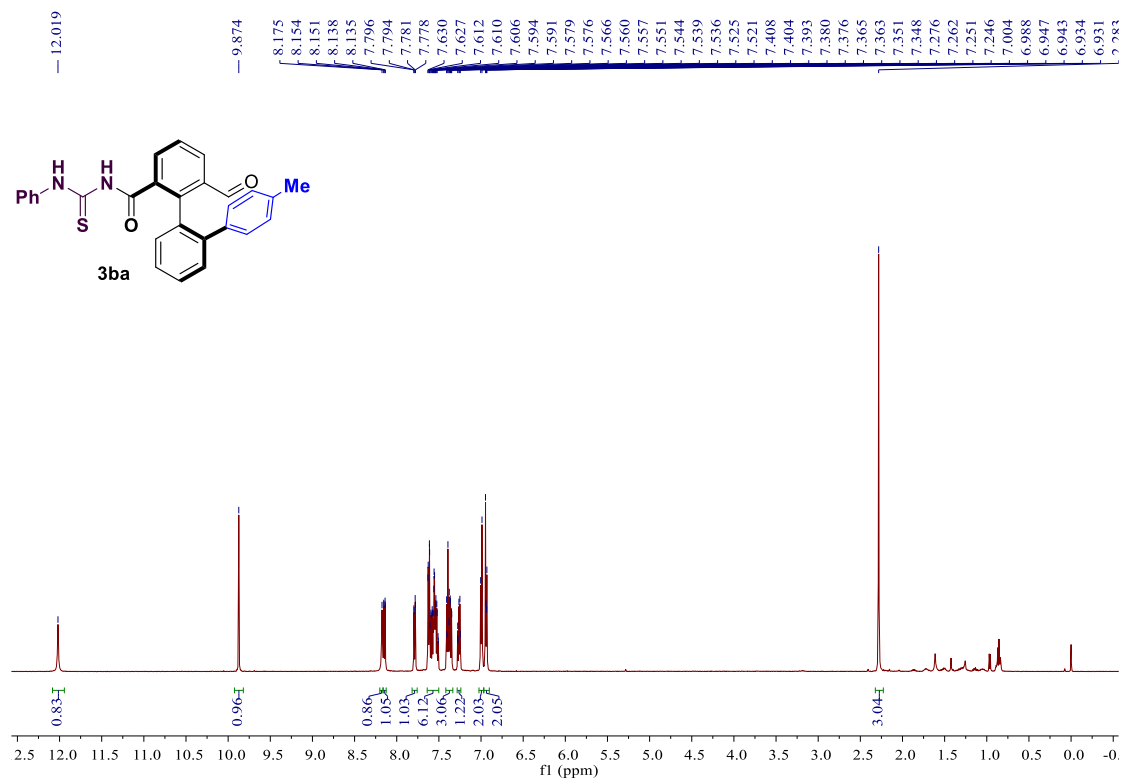

**<sup>1</sup>H NMR (500 MHz, CDCl<sub>3</sub>) spectrum of 3ba.**

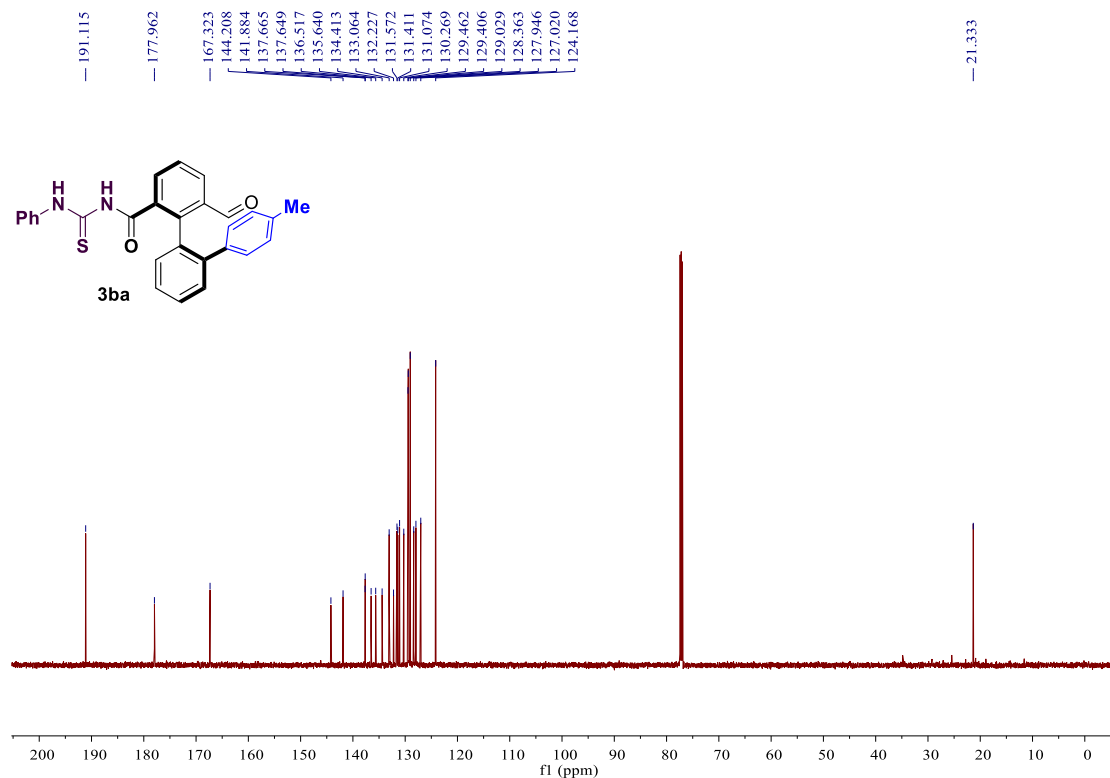

**<sup>13</sup>C NMR (150 MHz, CDCl<sub>3</sub>) spectrum of 3ba.**

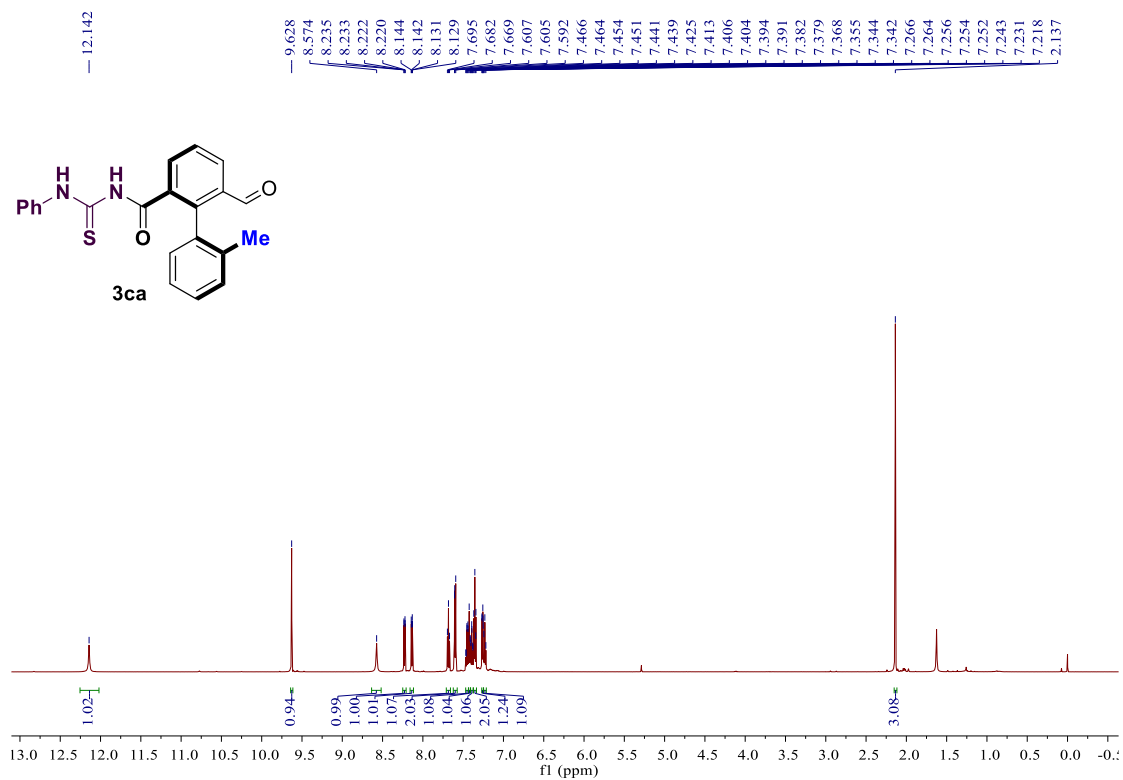

$^1\text{H NMR}$  (600 MHz,  $\text{CDCl}_3$ ) spectrum of **3ca**.

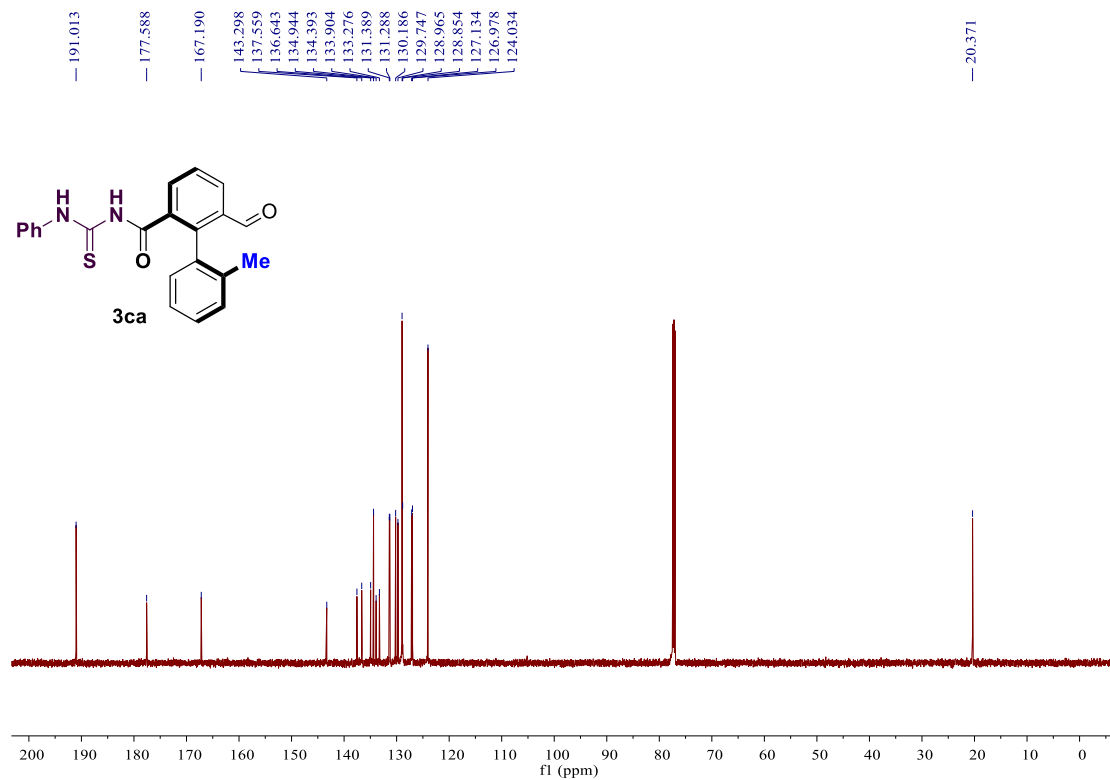

$^{13}\text{C NMR}$  (150 MHz,  $\text{CDCl}_3$ ) spectrum of **3ca**.

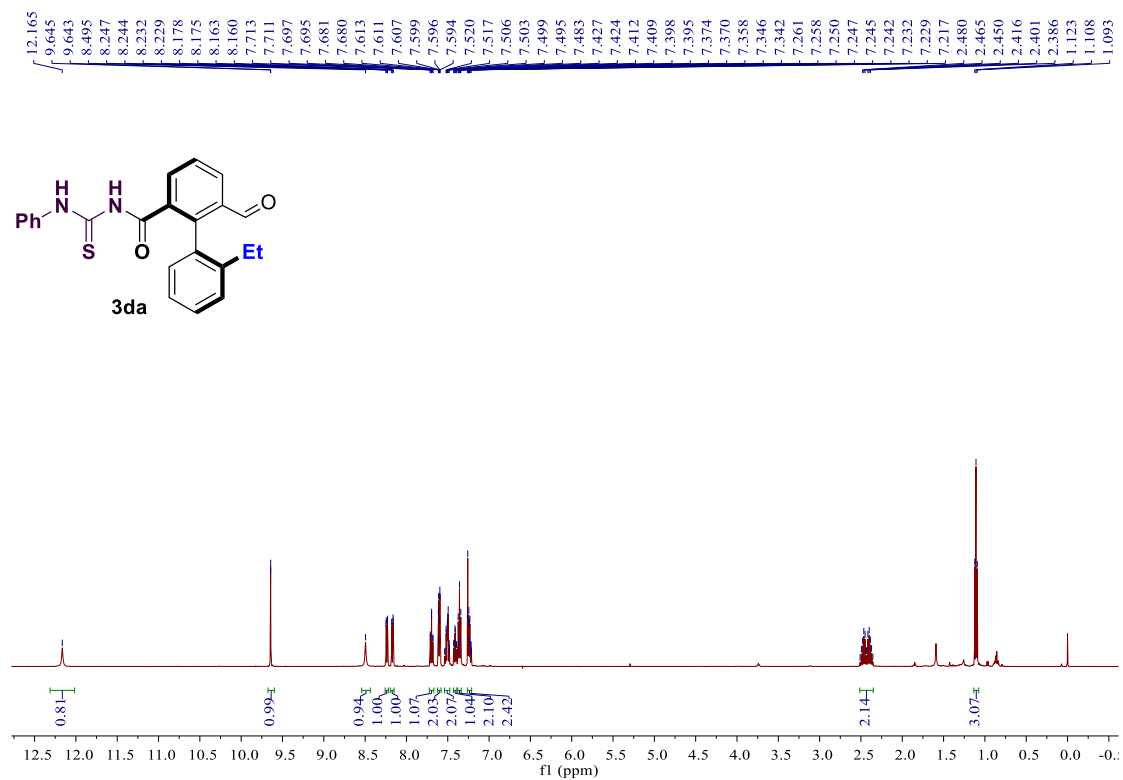

**<sup>1</sup>H NMR (500 MHz, CDCl<sub>3</sub>) spectrum of 3da.**

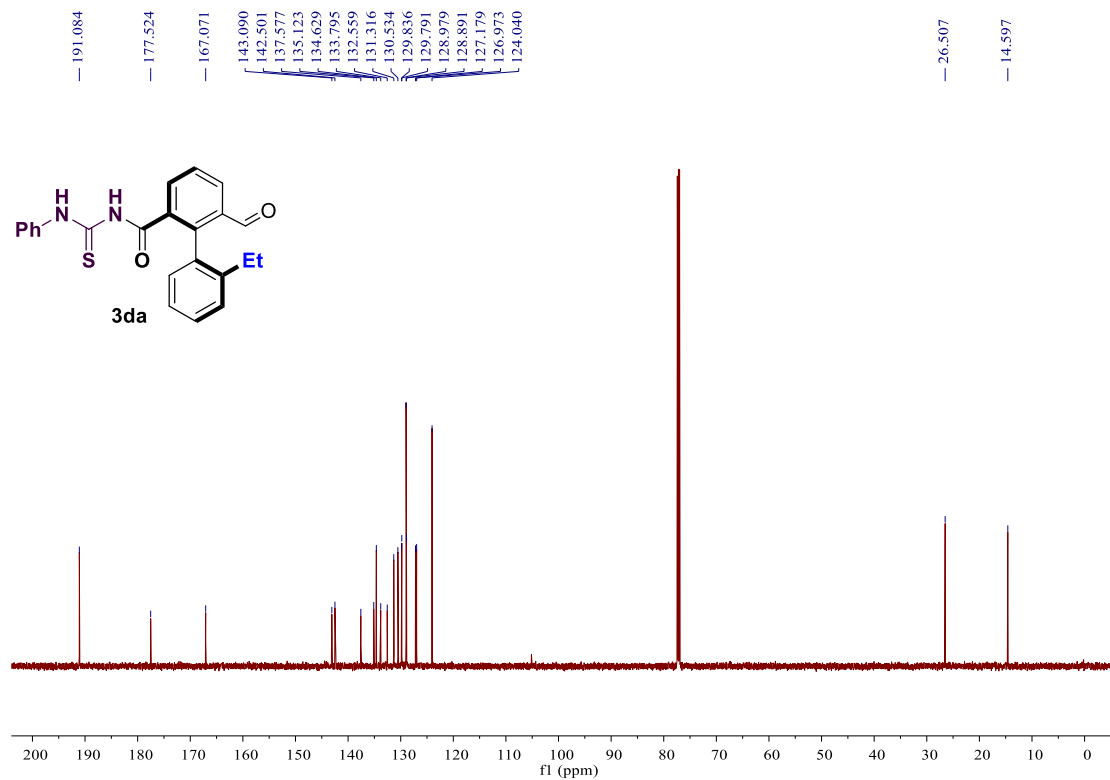

**<sup>13</sup>C NMR (150 MHz, CDCl<sub>3</sub>) spectrum of 3da.**



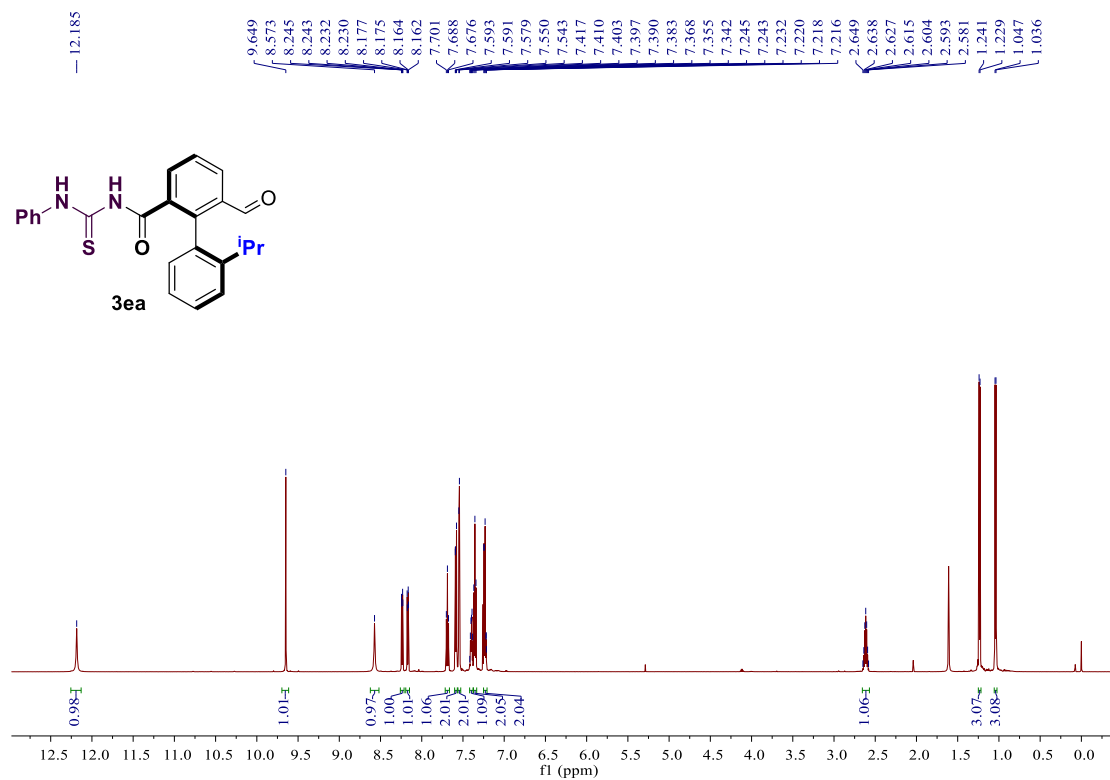

$^1\text{H}$  NMR (600 MHz,  $\text{CDCl}_3$ ) spectrum of **3ea**.

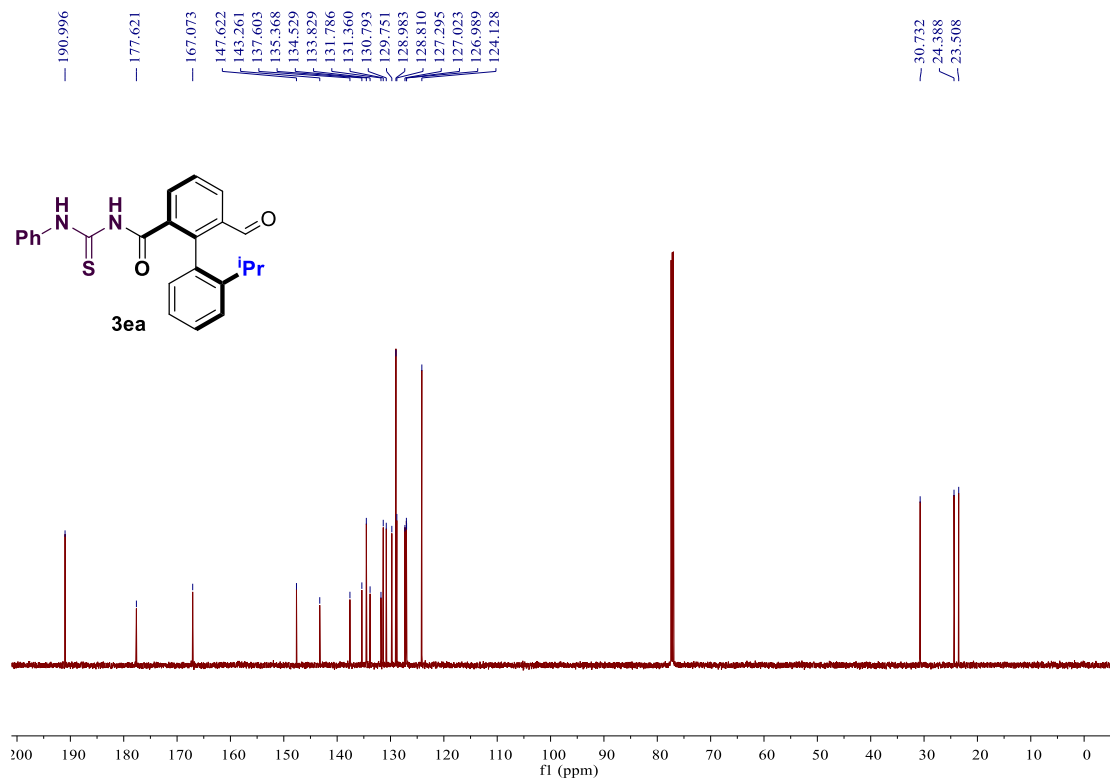

$^{13}\text{C}$  NMR (150 MHz,  $\text{CDCl}_3$ ) spectrum of **3ea**.

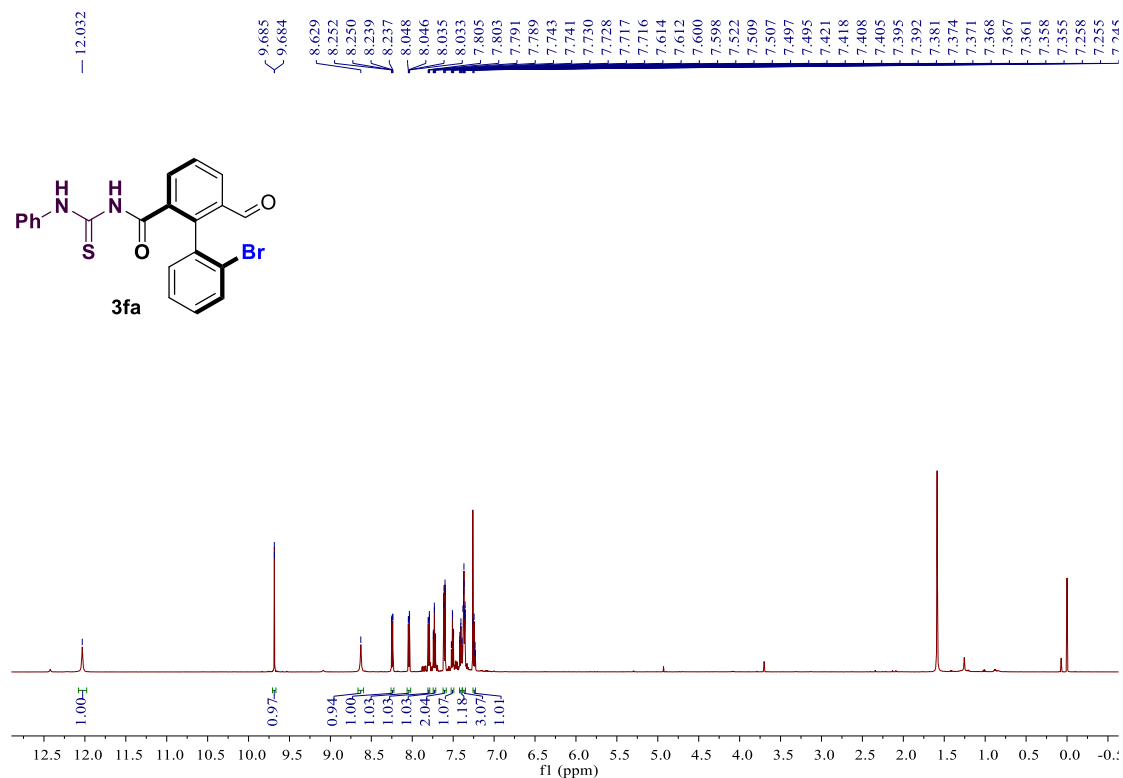

<sup>1</sup>H NMR (600 MHz, CDCl<sub>3</sub>) spectrum of 3fa.

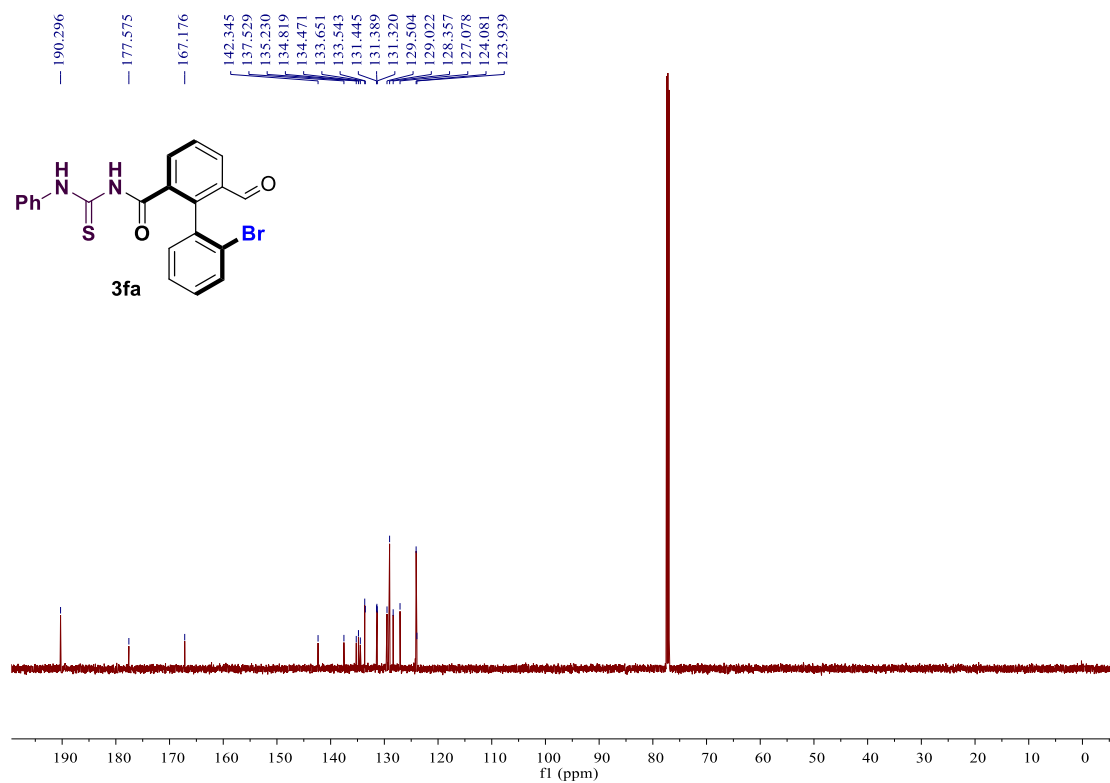

<sup>13</sup>C NMR (150 MHz, CDCl<sub>3</sub>) spectrum of 3fa.

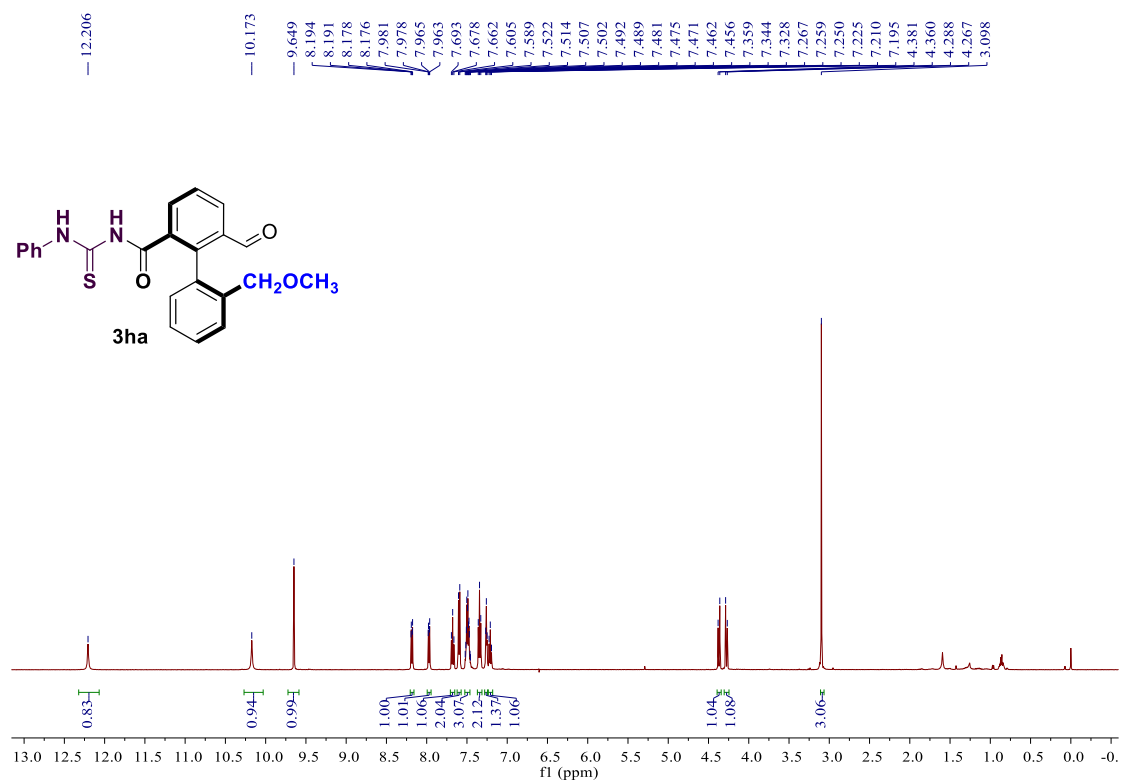

**<sup>1</sup>H NMR (500 MHz, CDCl<sub>3</sub>) spectrum of 3ha.**

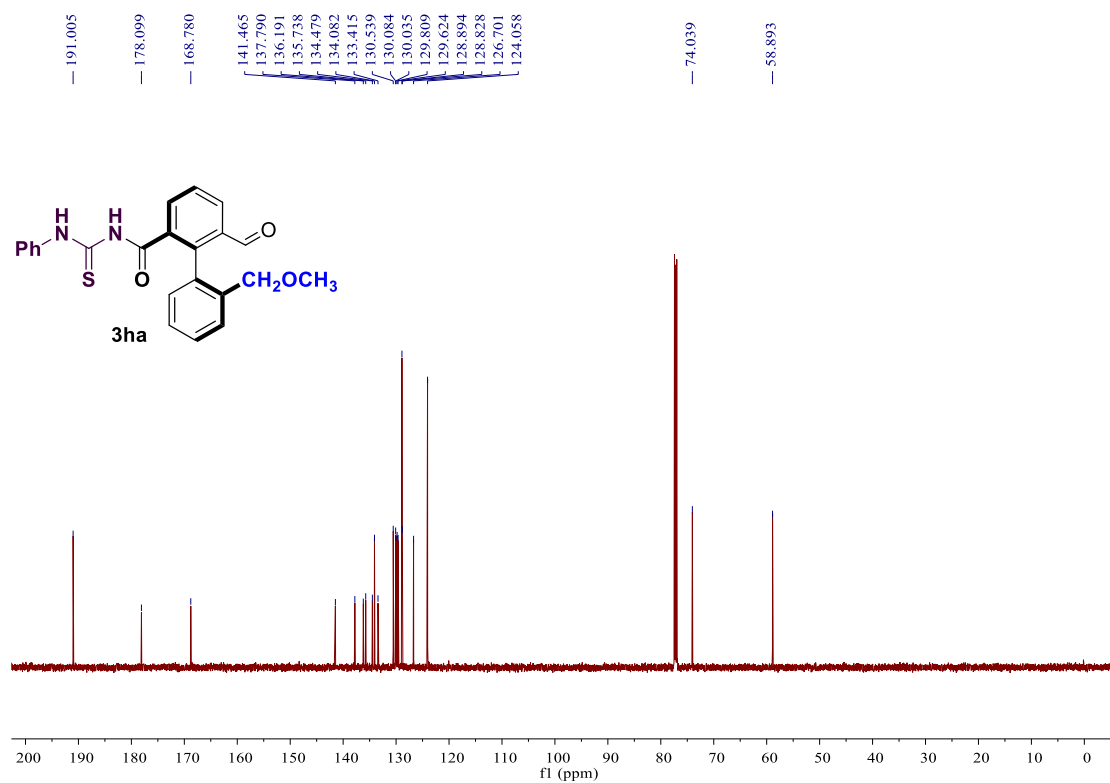

**<sup>13</sup>C NMR (150 MHz, CDCl<sub>3</sub>) spectrum of 3ha.**

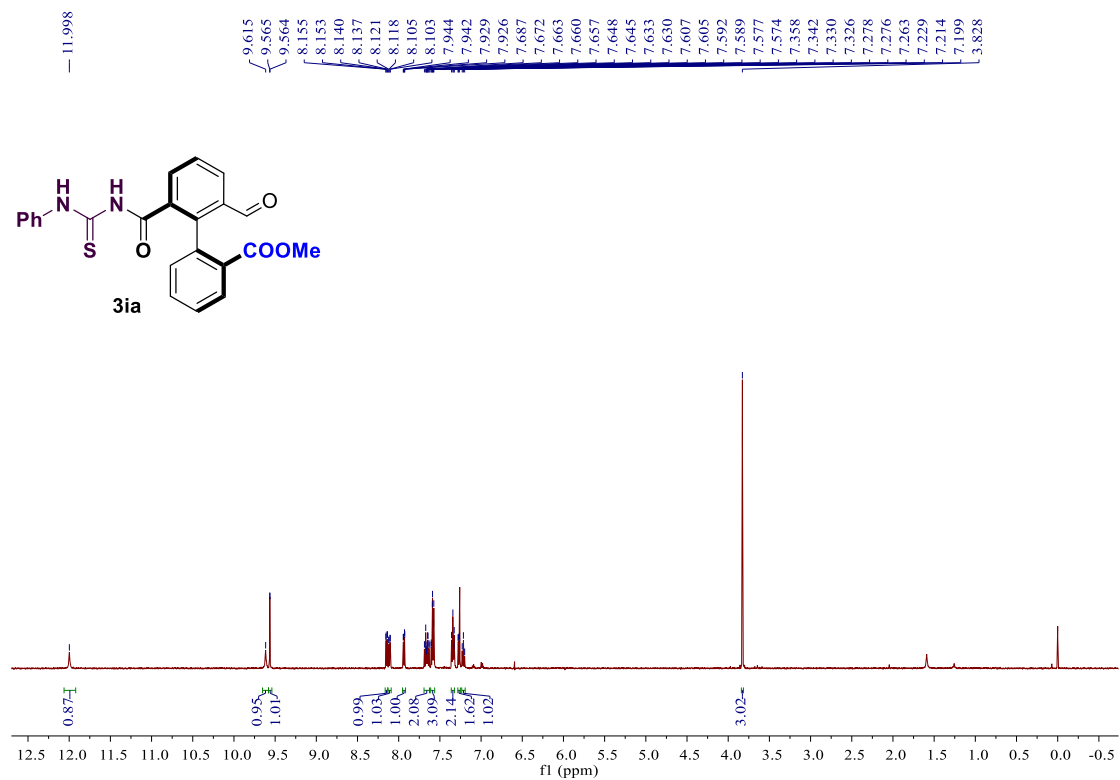

$^1\text{H NMR}$  (500 MHz,  $\text{CDCl}_3$ ) spectrum of **3ia**.

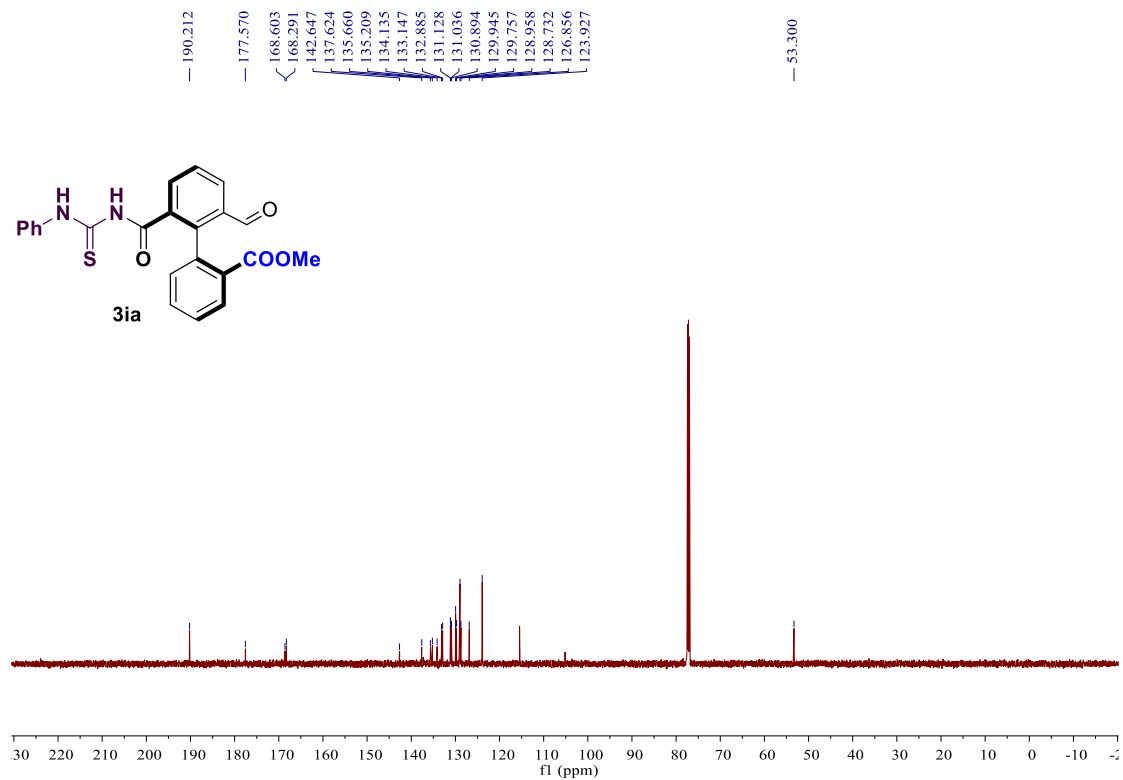

$^{13}\text{C NMR}$  (150 MHz,  $\text{CDCl}_3$ ) spectrum of **3ia**.

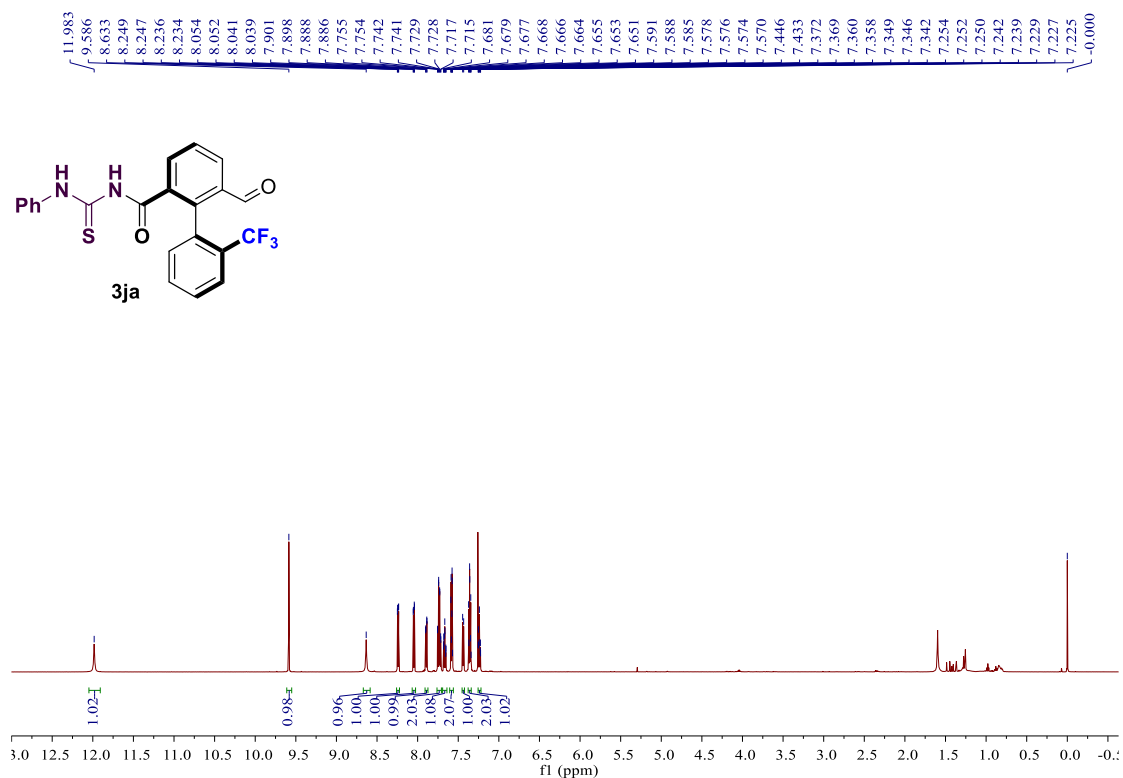

**<sup>1</sup>H NMR (600 MHz, CDCl<sub>3</sub>) spectrum of 3ja.**

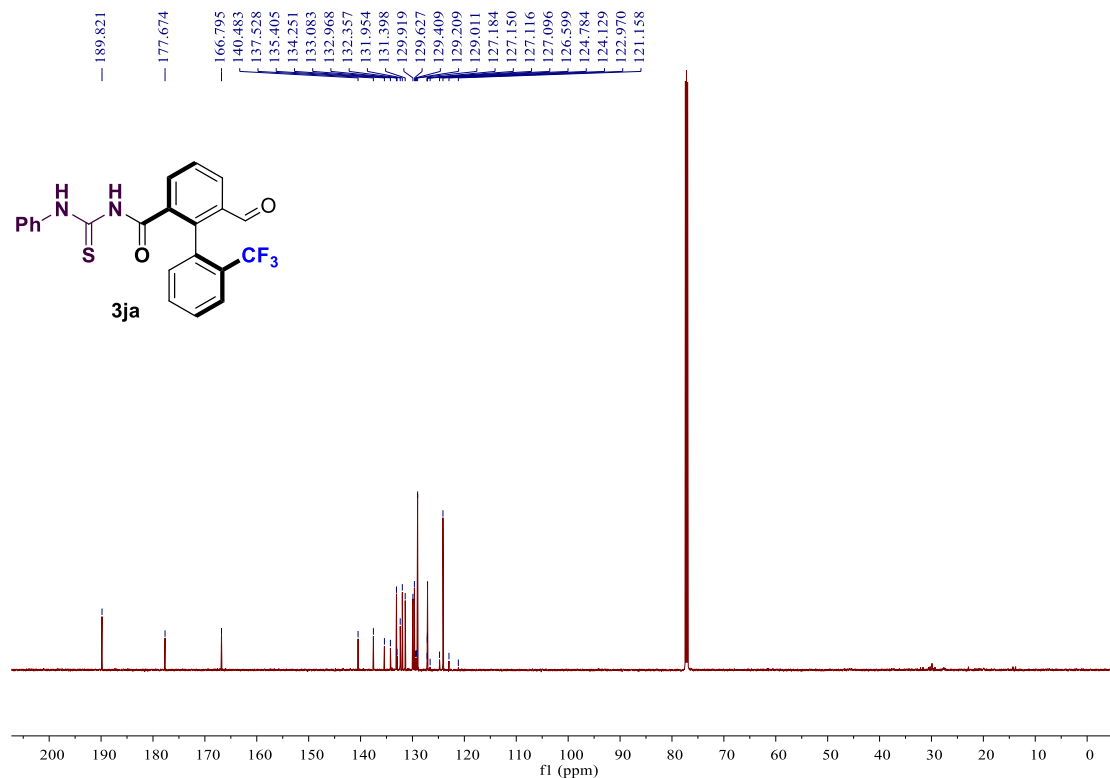

**<sup>13</sup>C NMR (150 MHz, CDCl<sub>3</sub>) spectrum of 3ja.**

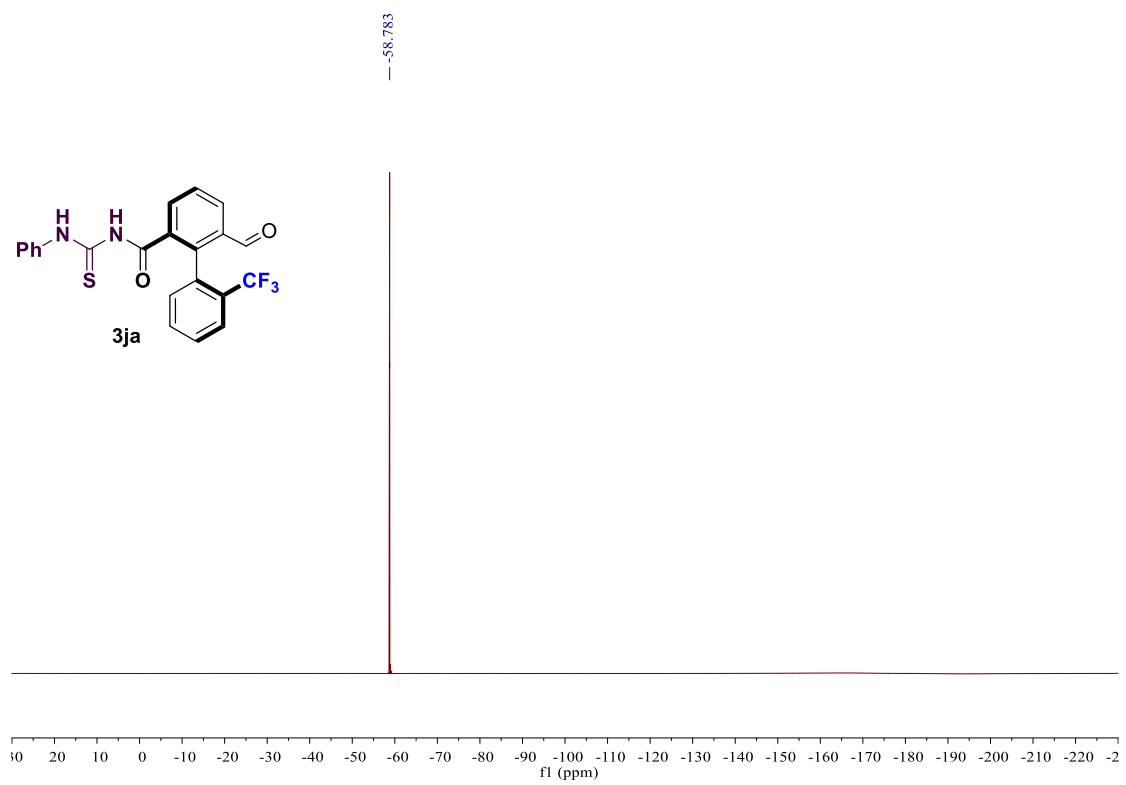

**$^{19}\text{F}$  NMR (565 MHz,  $\text{CDCl}_3$ ) spectrum of 3ja.**

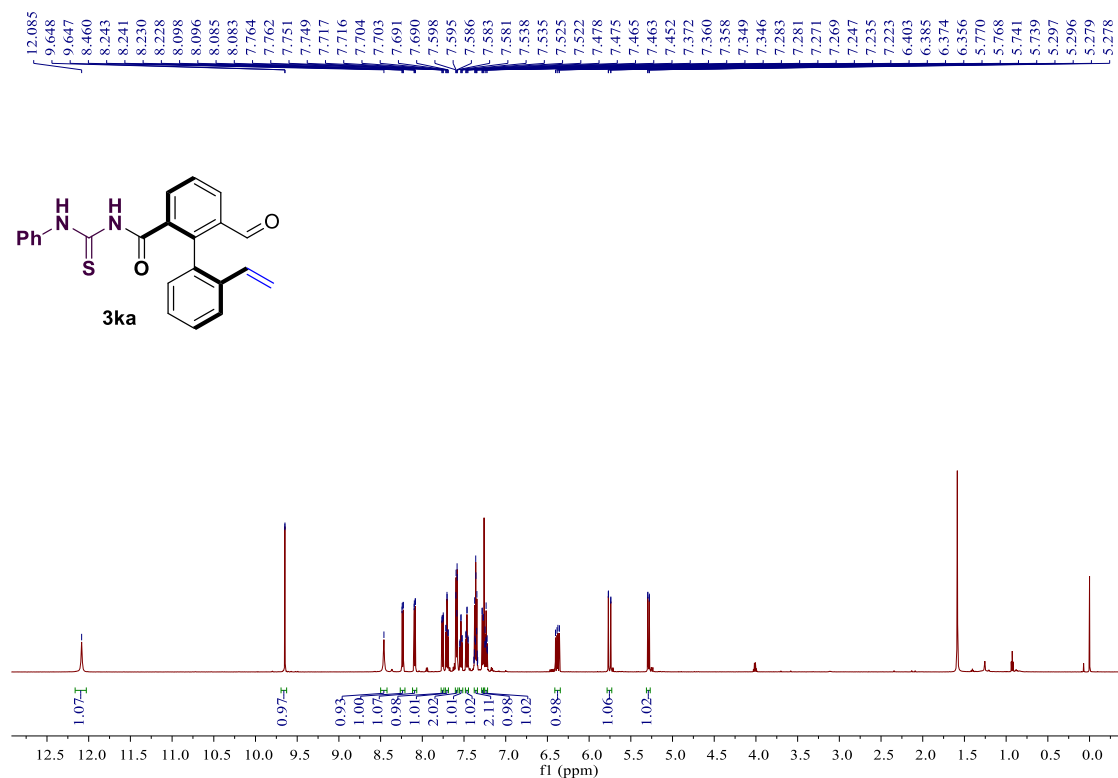

$^1\text{H}$  NMR (600 MHz,  $\text{CDCl}_3$ ) spectrum of **3ka**.

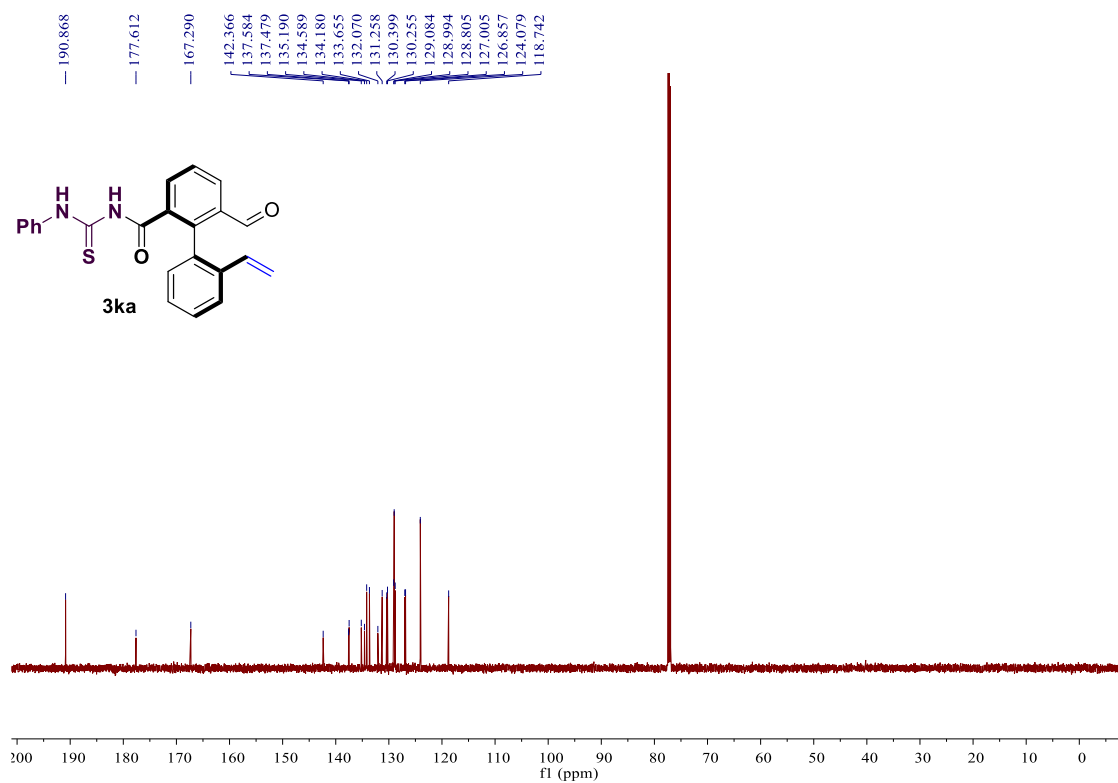

$^{13}\text{C}$  NMR (150 MHz,  $\text{CDCl}_3$ ) spectrum of **3ka**.

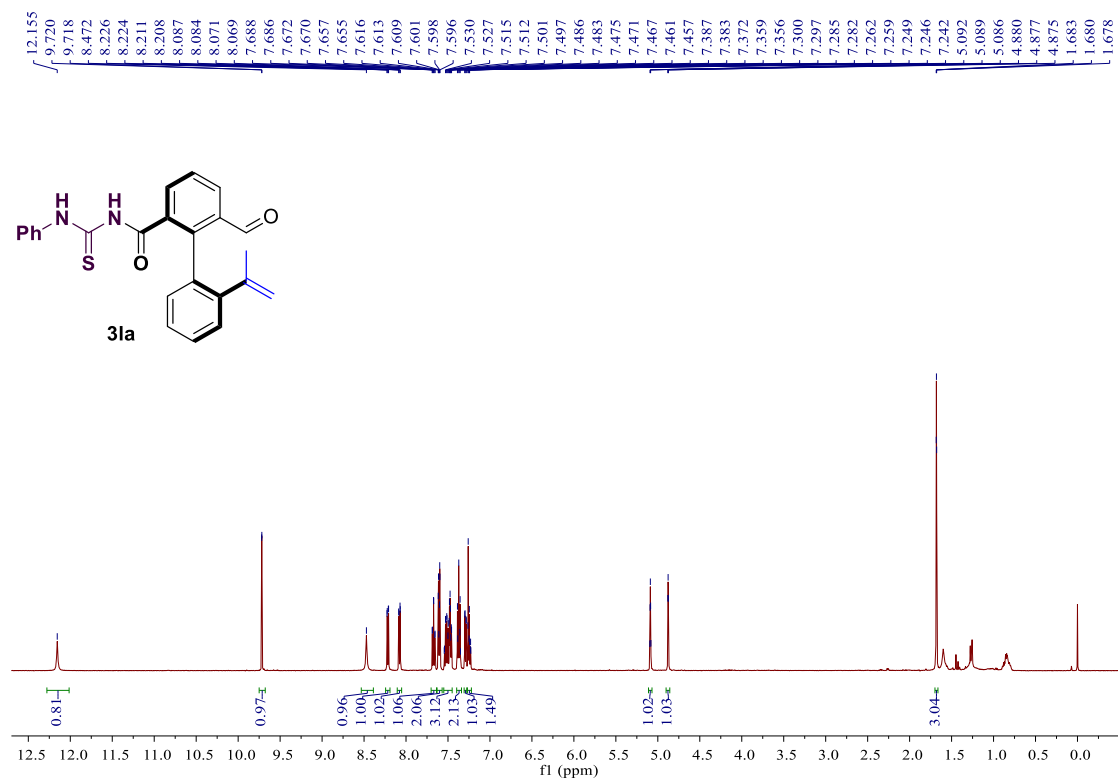

**<sup>1</sup>H NMR (500 MHz, CDCl<sub>3</sub>) spectrum of 3la.**

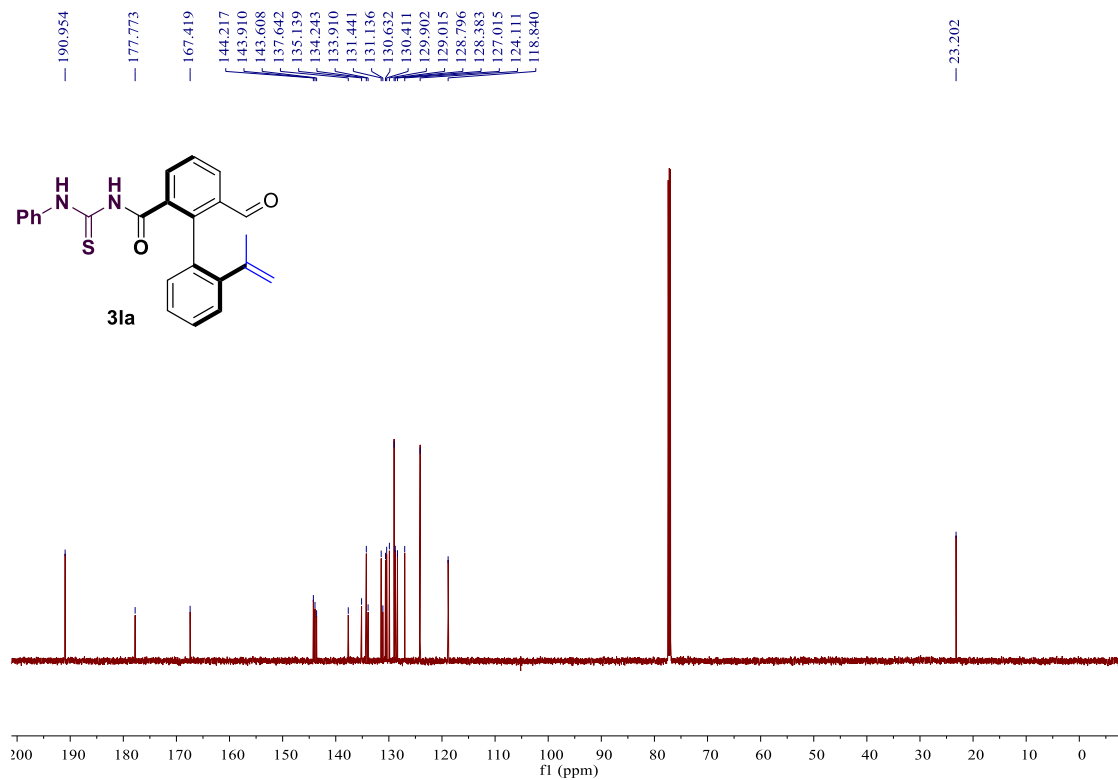

**<sup>13</sup>C NMR (150 MHz, CDCl<sub>3</sub>) spectrum of 3la.**



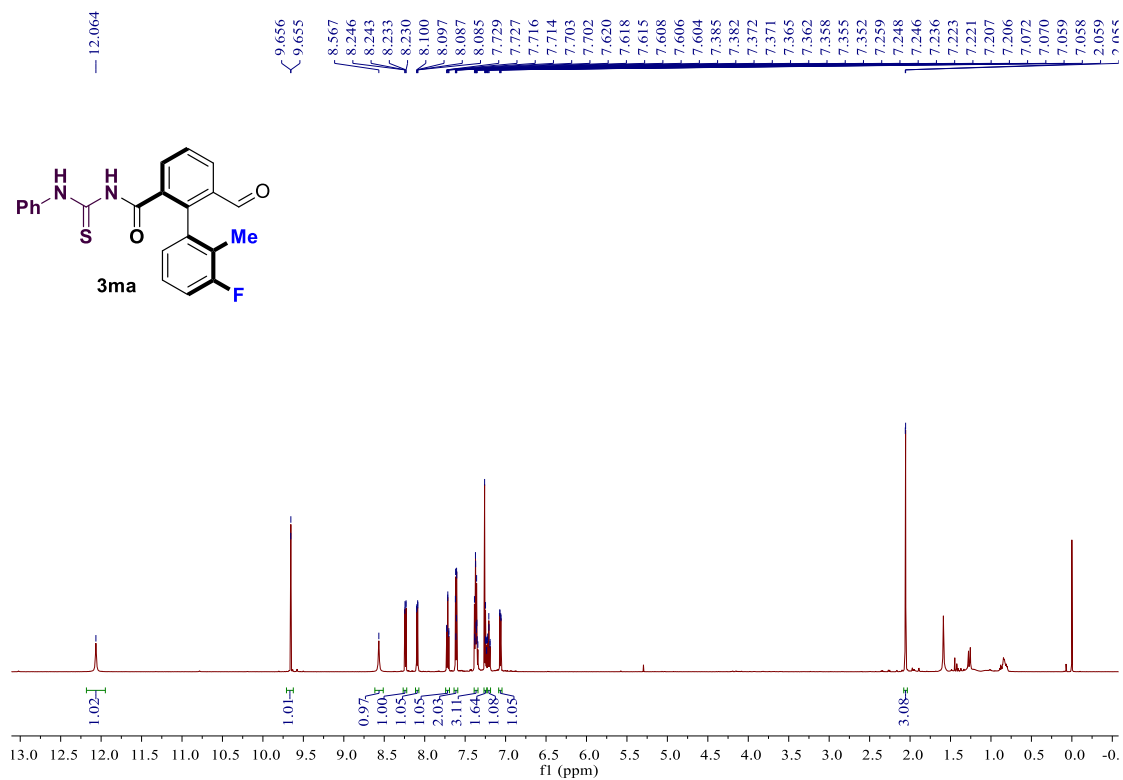

**<sup>1</sup>H NMR (600 MHz, CDCl<sub>3</sub>) spectrum of 3ma.**

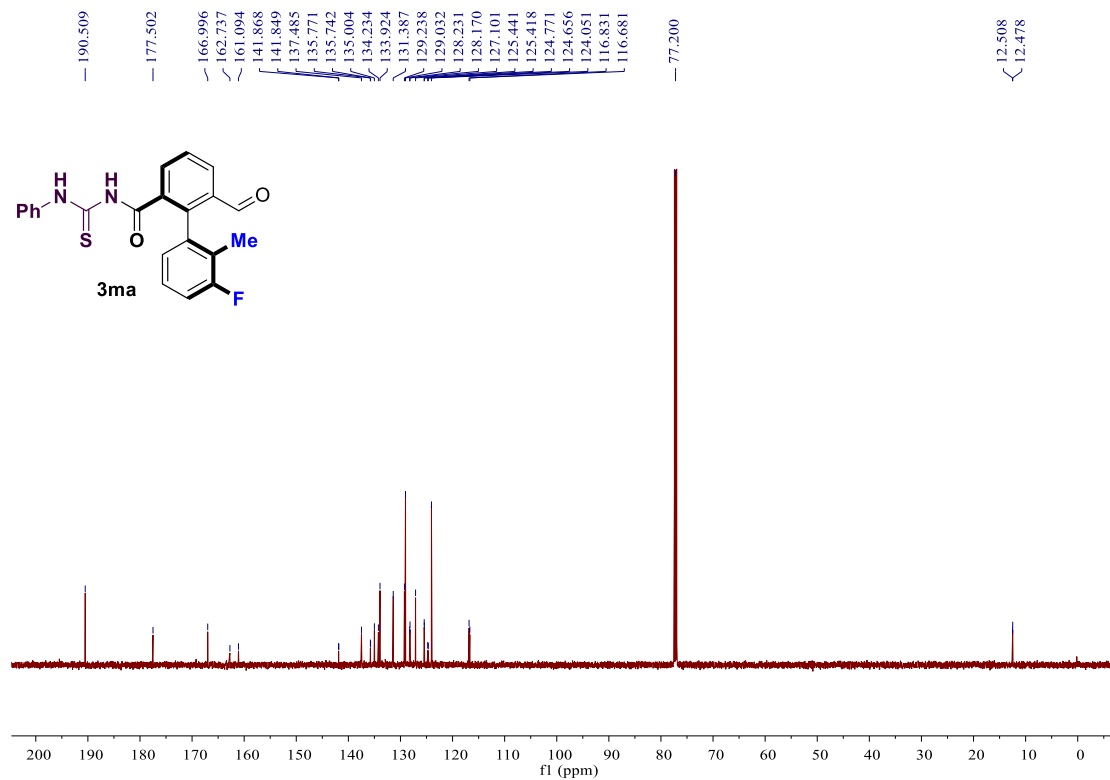

**<sup>13</sup>C NMR (150 MHz, CDCl<sub>3</sub>) spectrum of 3ma.**

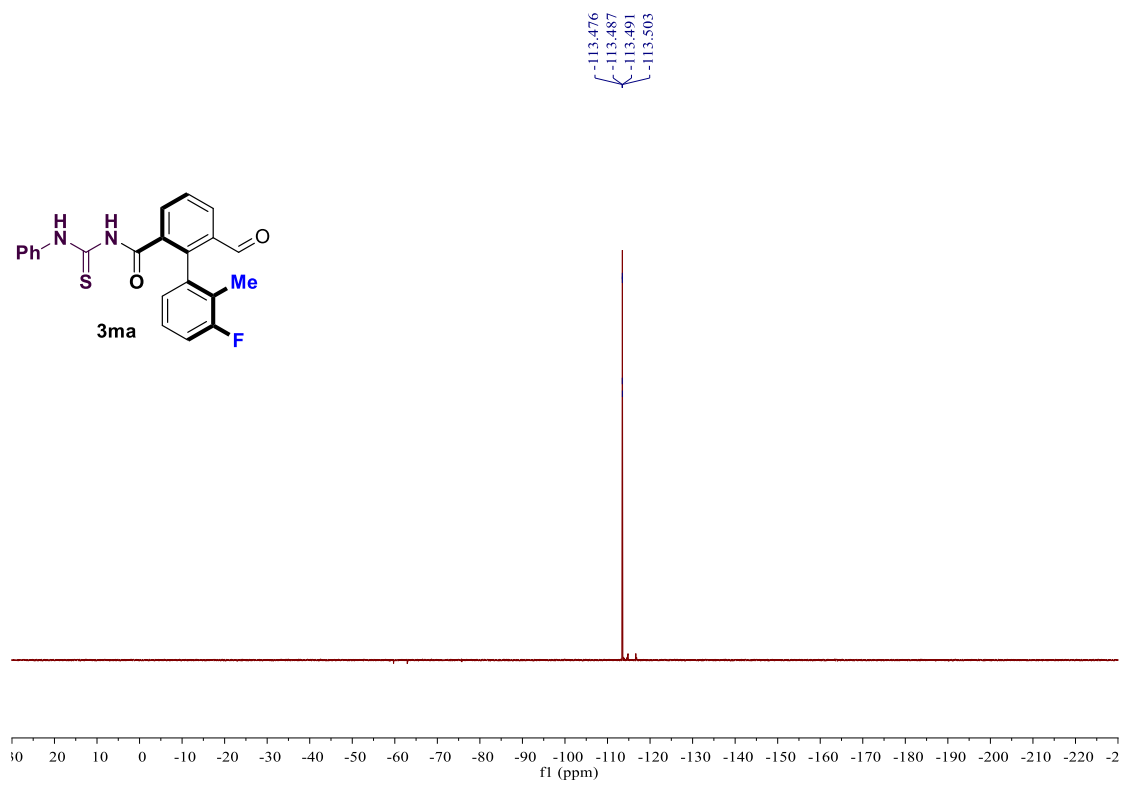

**$^{19}\text{F}$  NMR (565 MHz,  $\text{CDCl}_3$ ) spectrum of 3ma.**

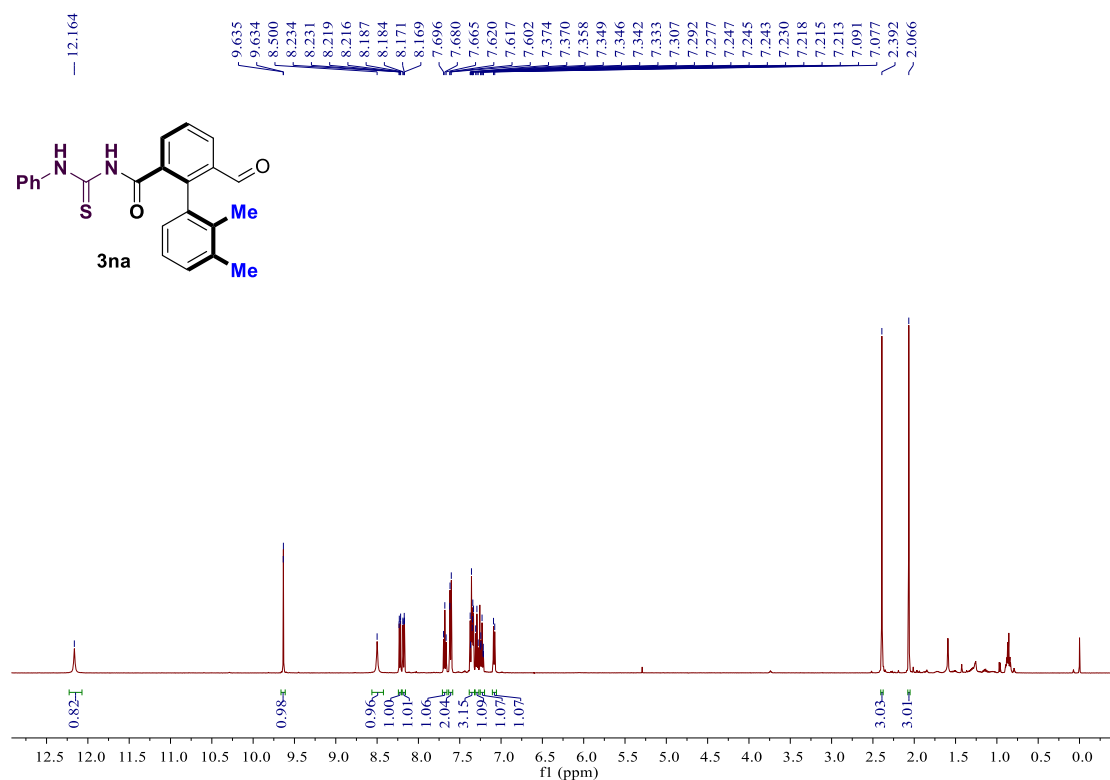

**<sup>1</sup>H NMR (500 MHz, CDCl<sub>3</sub>) spectrum of 3na.**

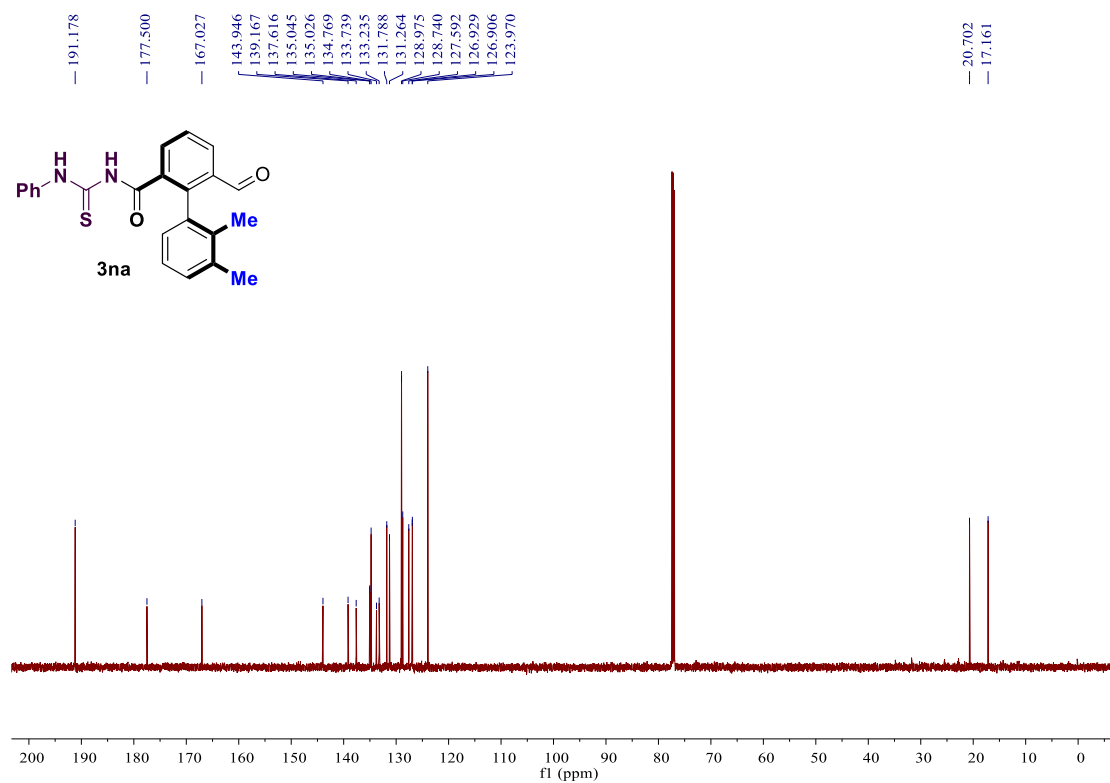

**<sup>13</sup>C NMR (150 MHz, CDCl<sub>3</sub>) spectrum of 3na.**

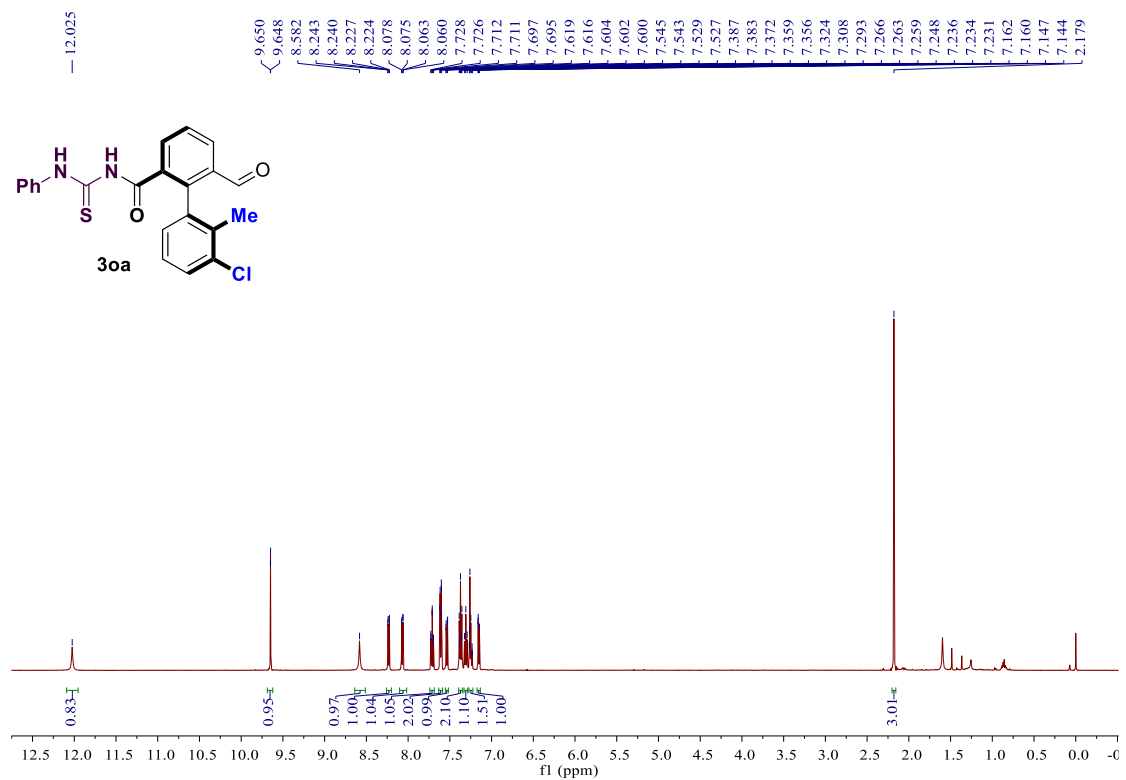

<sup>1</sup>H NMR (500 MHz, CDCl<sub>3</sub>) spectrum of 30a.

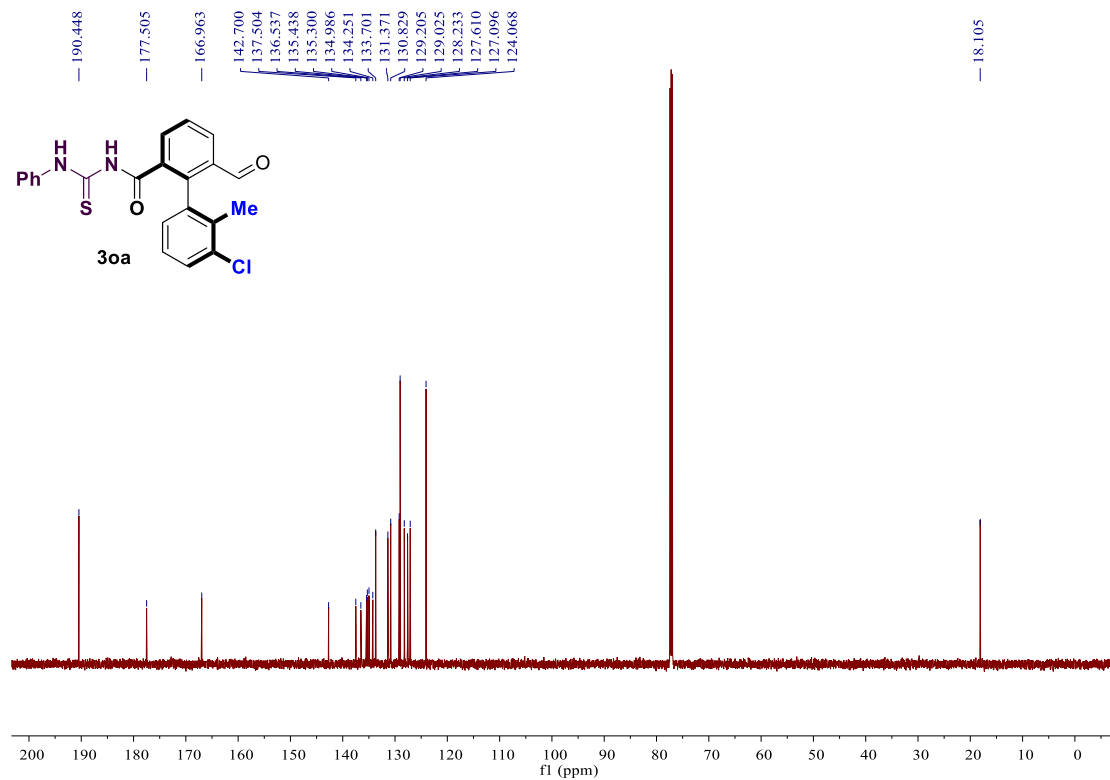

<sup>13</sup>C NMR (150 MHz, CDCl<sub>3</sub>) spectrum of 30a.

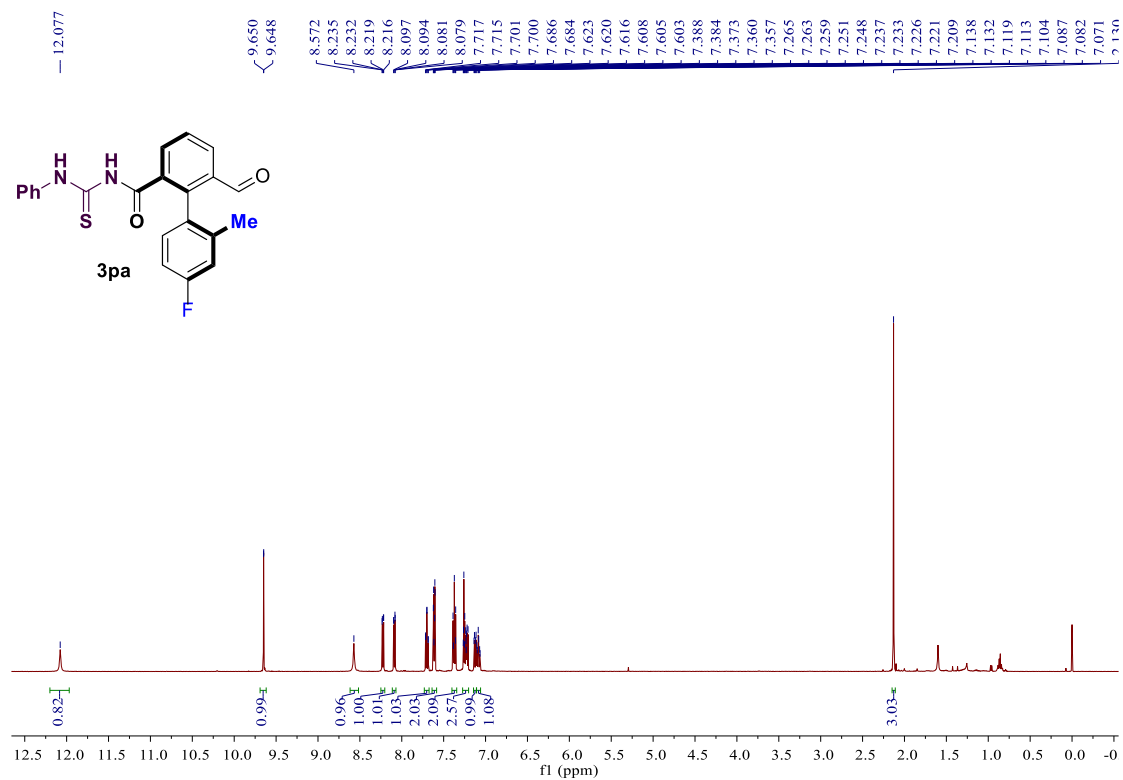

**<sup>1</sup>H NMR (500 MHz, CDCl<sub>3</sub>) spectrum of 3pa.**

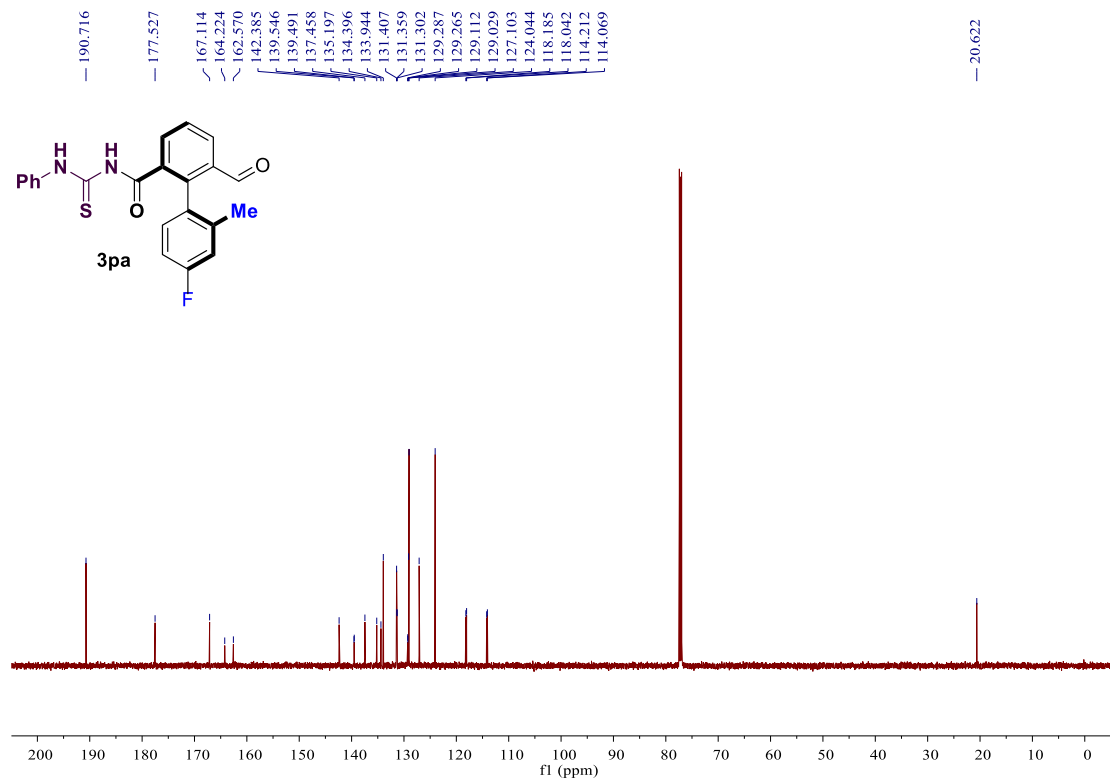

**<sup>13</sup>C NMR (150 MHz, CDCl<sub>3</sub>) spectrum of 3pa.**

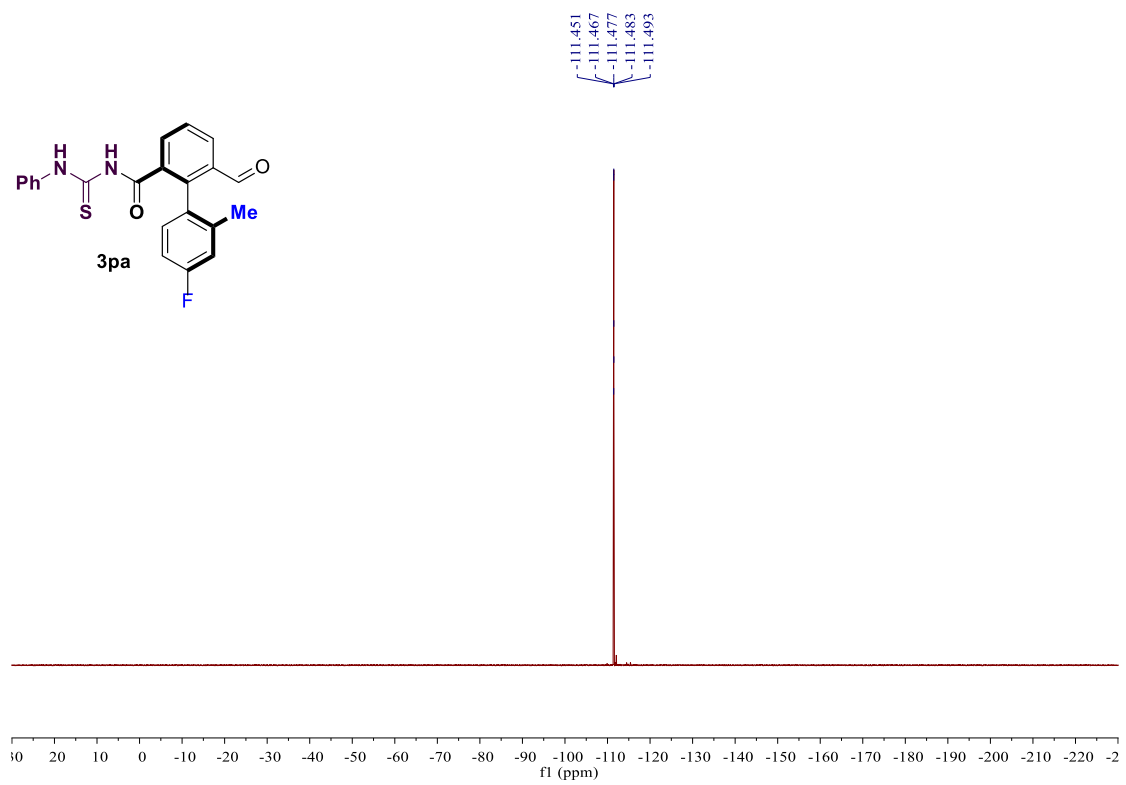

**$^{19}\text{F}$  NMR (565 MHz,  $\text{CDCl}_3$ ) spectrum of 3pa.**

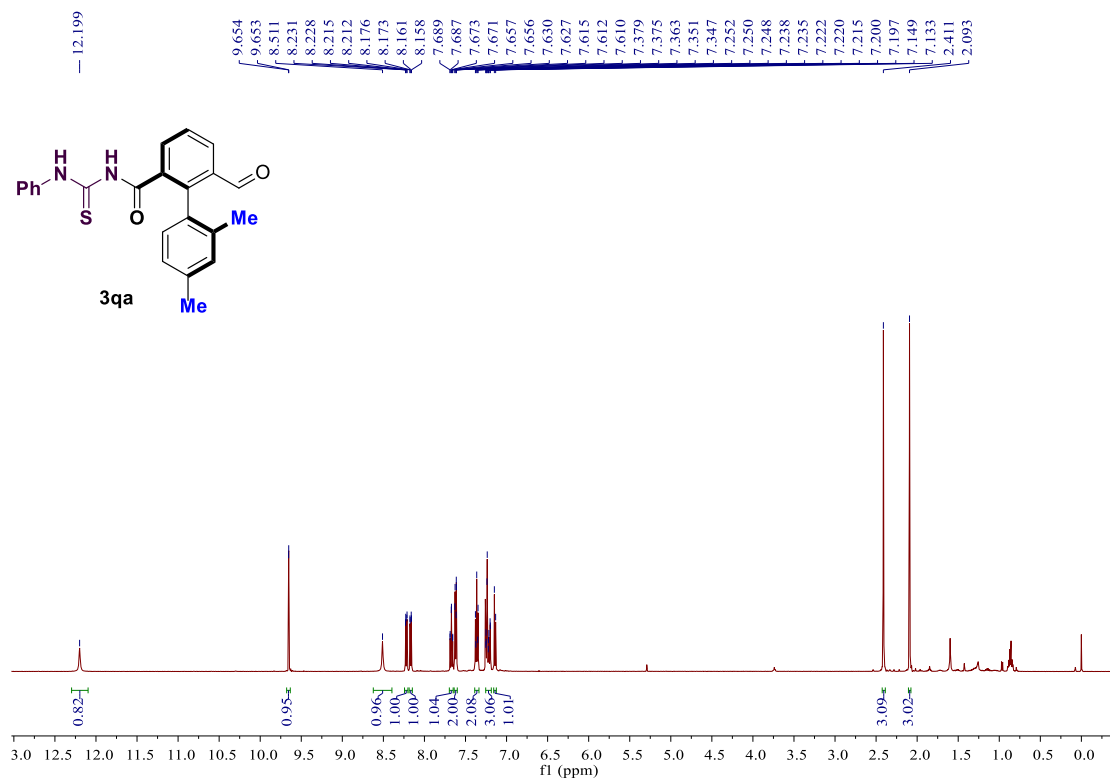

**<sup>1</sup>H NMR (500 MHz, CDCl<sub>3</sub>) spectrum of 3qa.**

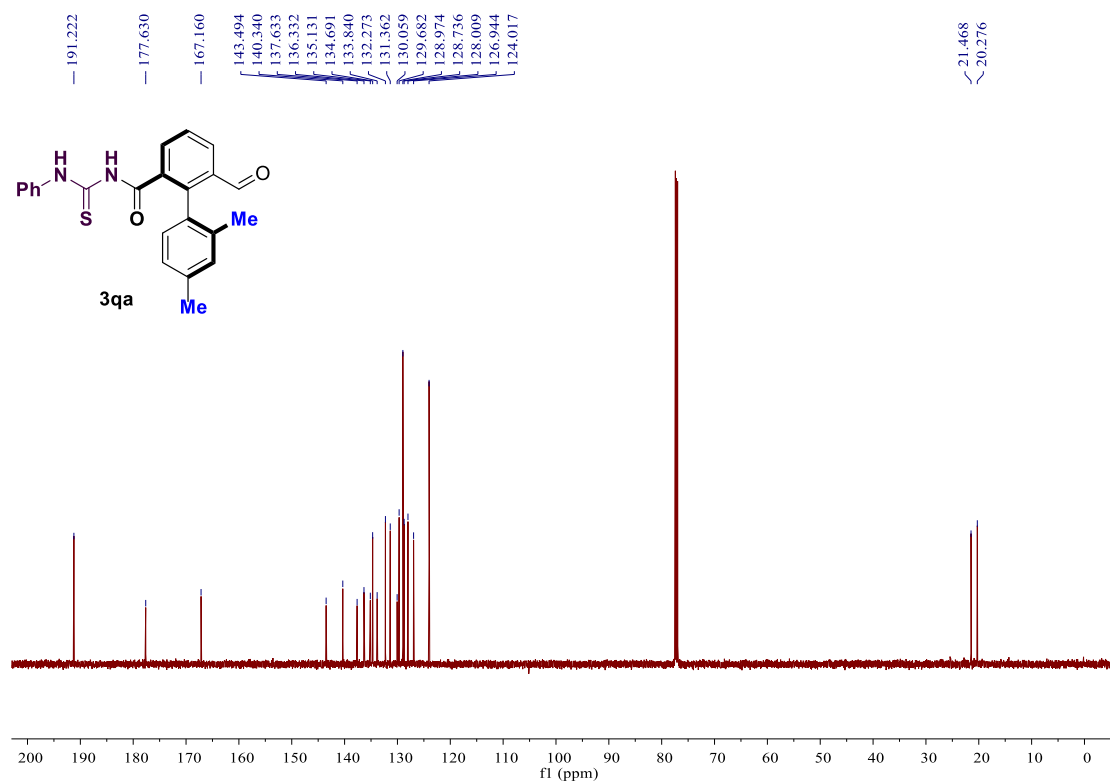

**<sup>13</sup>C NMR (150 MHz, CDCl<sub>3</sub>) spectrum of 3qa.**

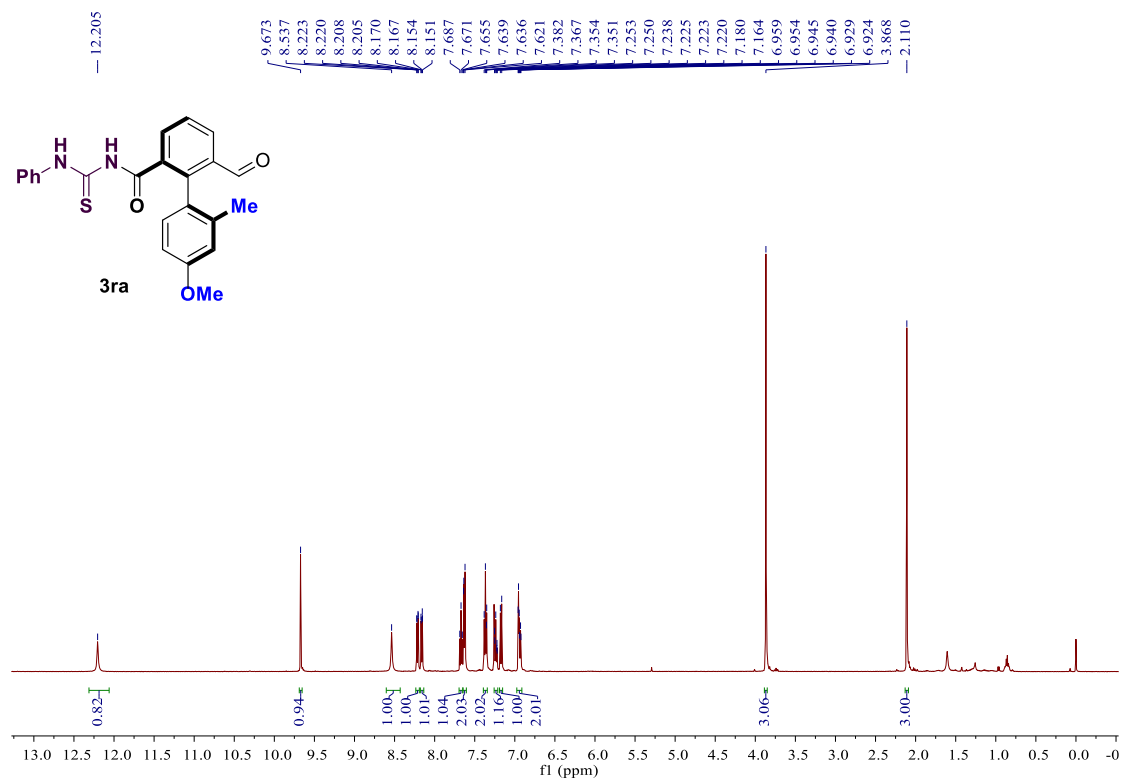

**<sup>1</sup>H NMR (500 MHz, CDCl<sub>3</sub>) spectrum of 3ra.**

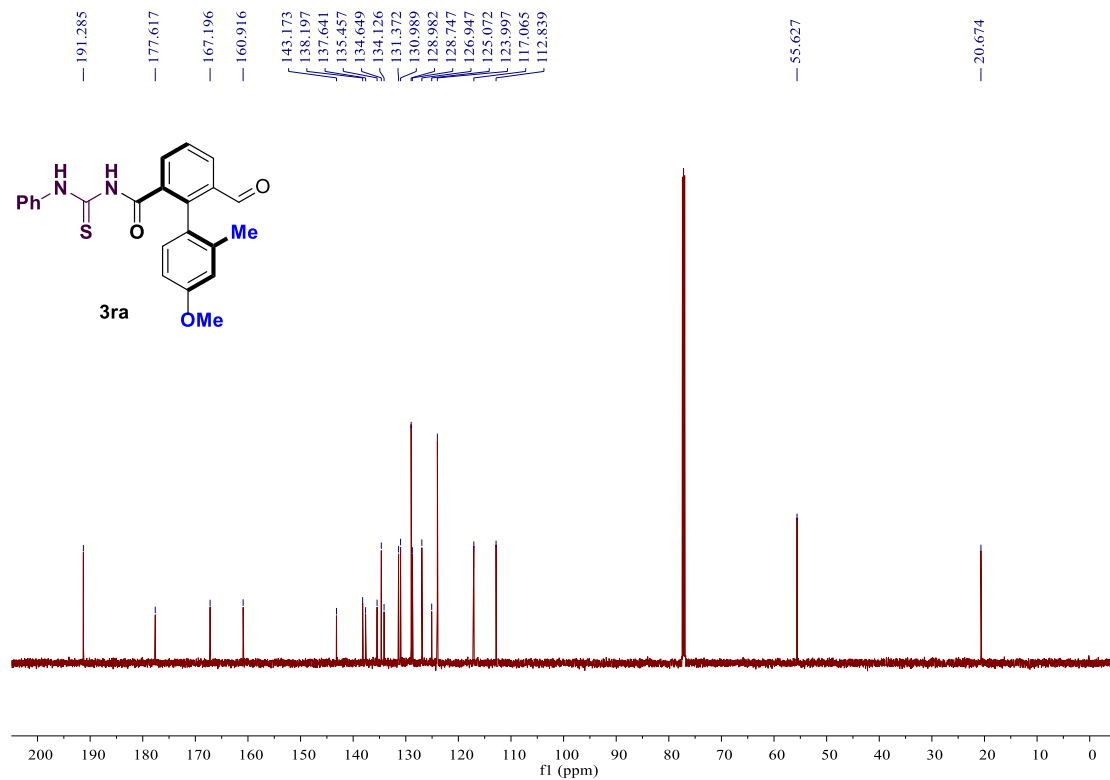

**<sup>13</sup>C NMR (150 MHz, CDCl<sub>3</sub>) spectrum of 3ra.**



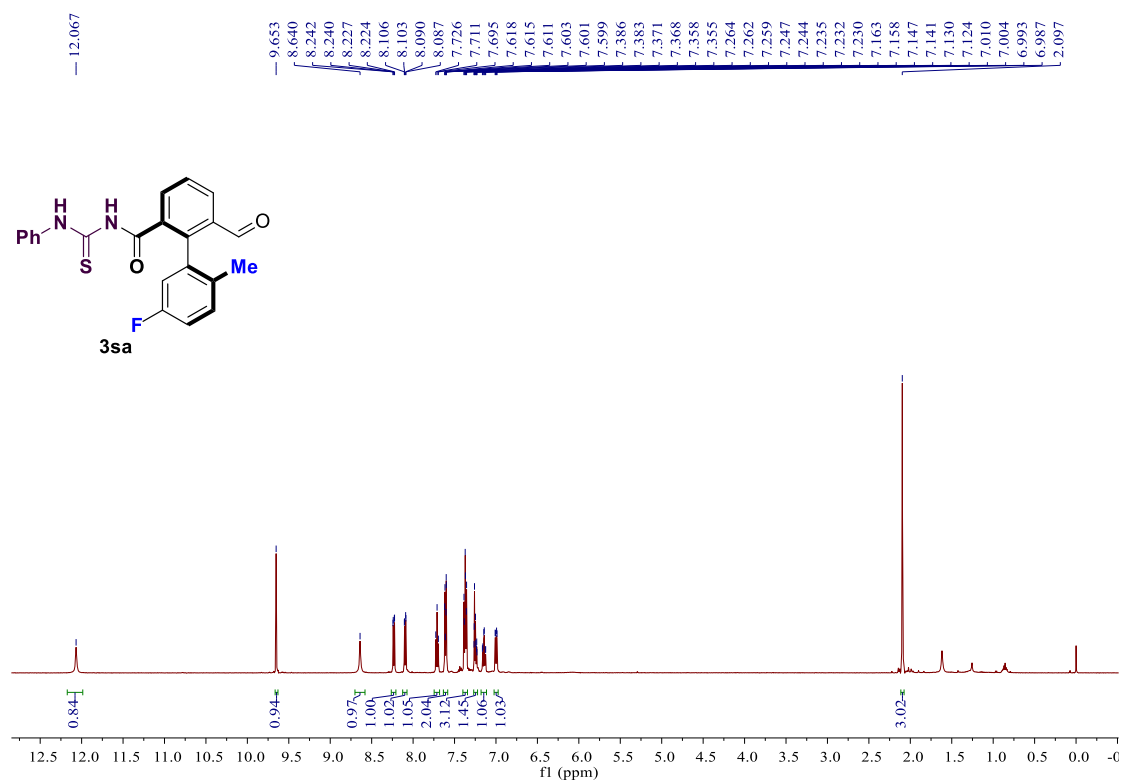

$^1\text{H NMR}$  (500 MHz,  $\text{CDCl}_3$ ) spectrum of **3sa**.

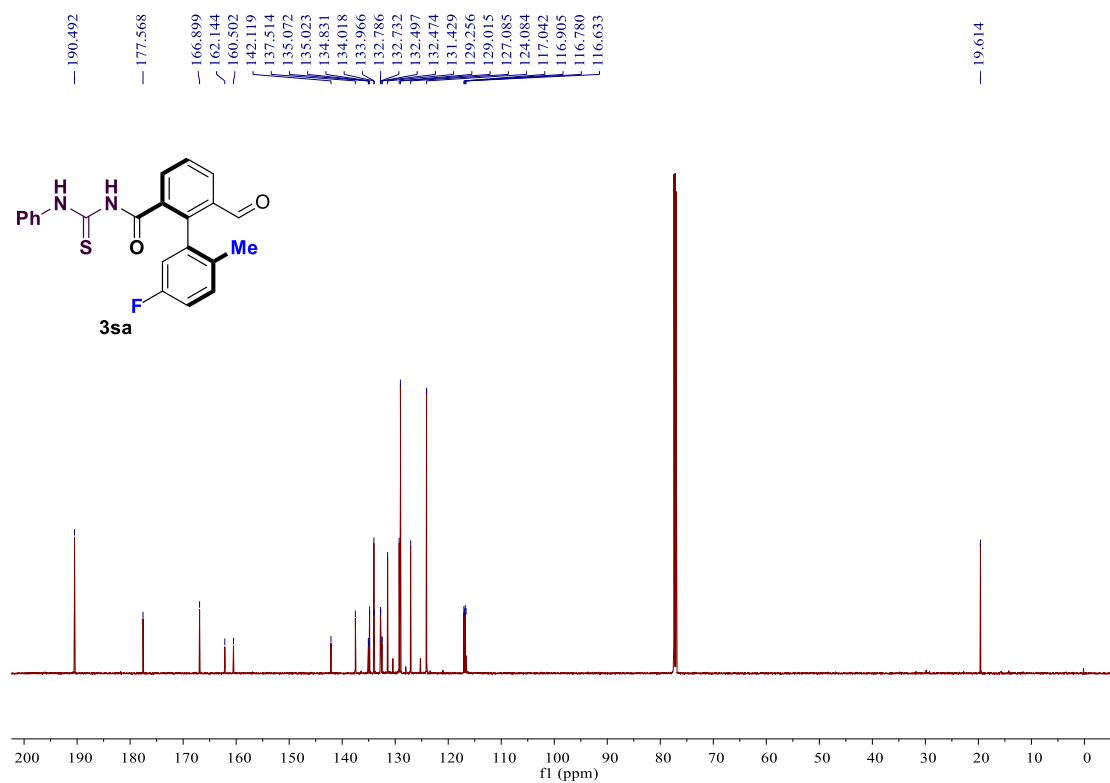

$^{13}\text{C NMR}$  (150 MHz,  $\text{CDCl}_3$ ) spectrum of **3sa**.

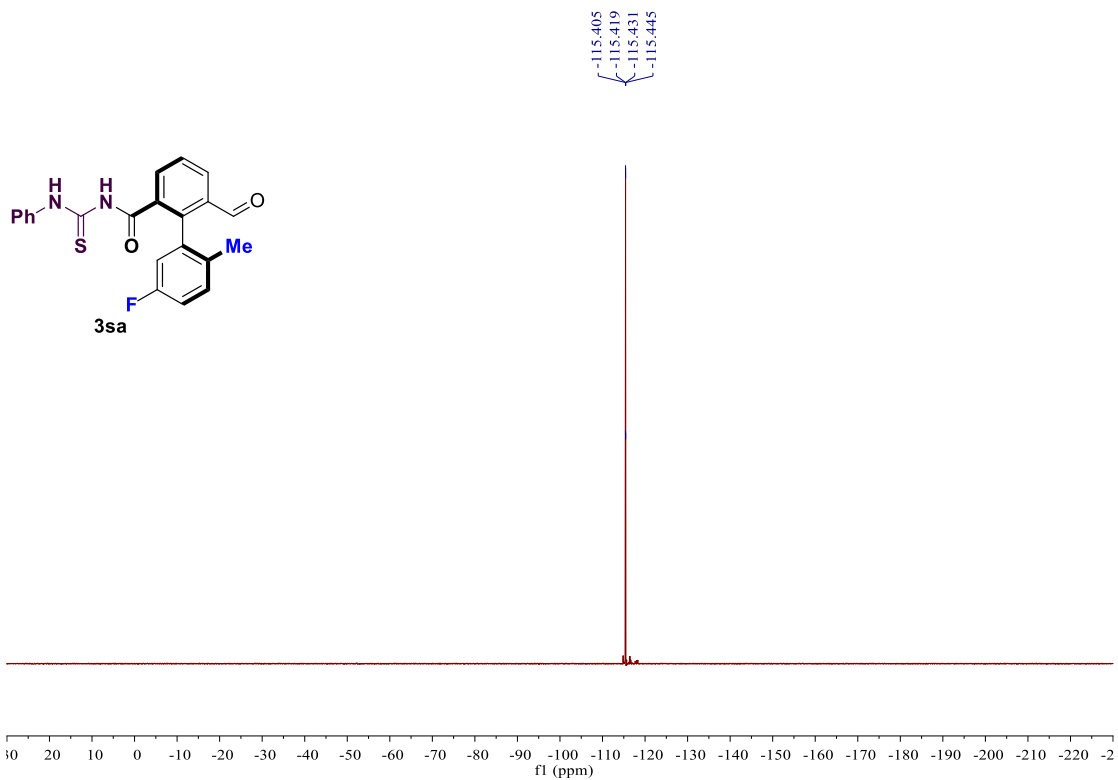

**$^{19}\text{F}$  NMR (565 MHz,  $\text{CDCl}_3$ ) spectrum of 3sa.**

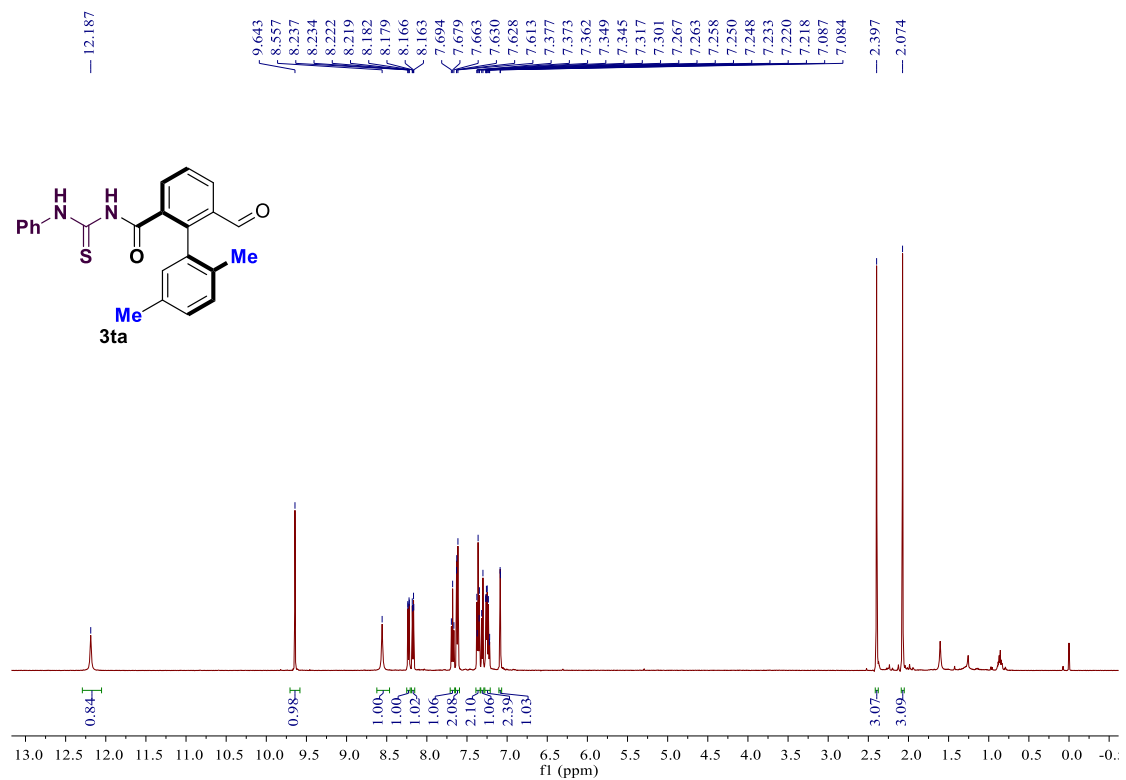

**<sup>1</sup>H NMR (500 MHz, CDCl<sub>3</sub>) spectrum of 3ta.**

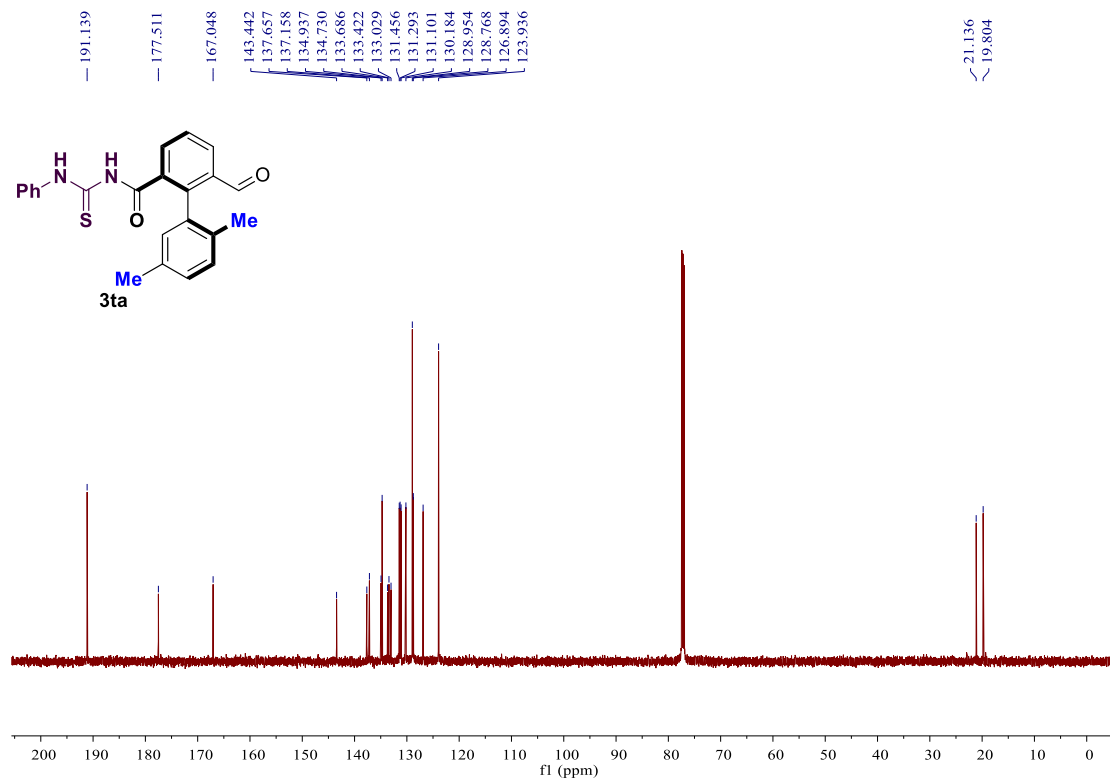

**<sup>13</sup>C NMR (150 MHz, CDCl<sub>3</sub>) spectrum of 3ta.**

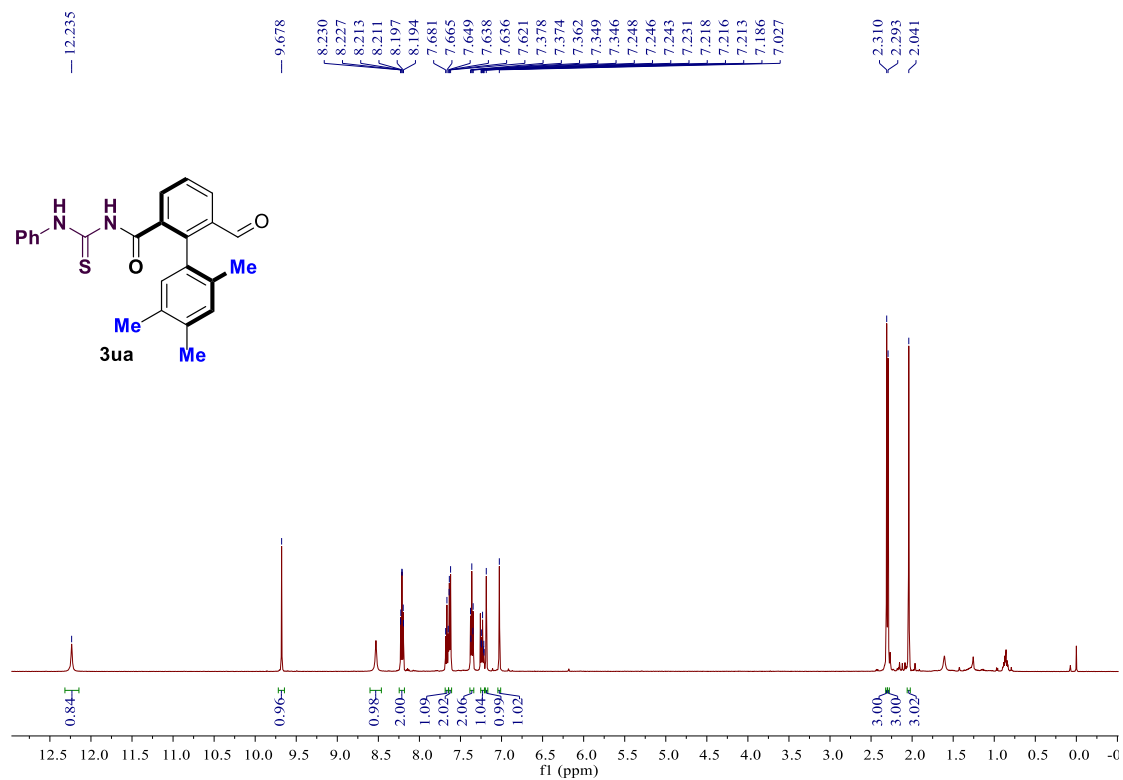

**<sup>1</sup>H NMR (500 MHz, CDCl<sub>3</sub>) spectrum of 3ua.**

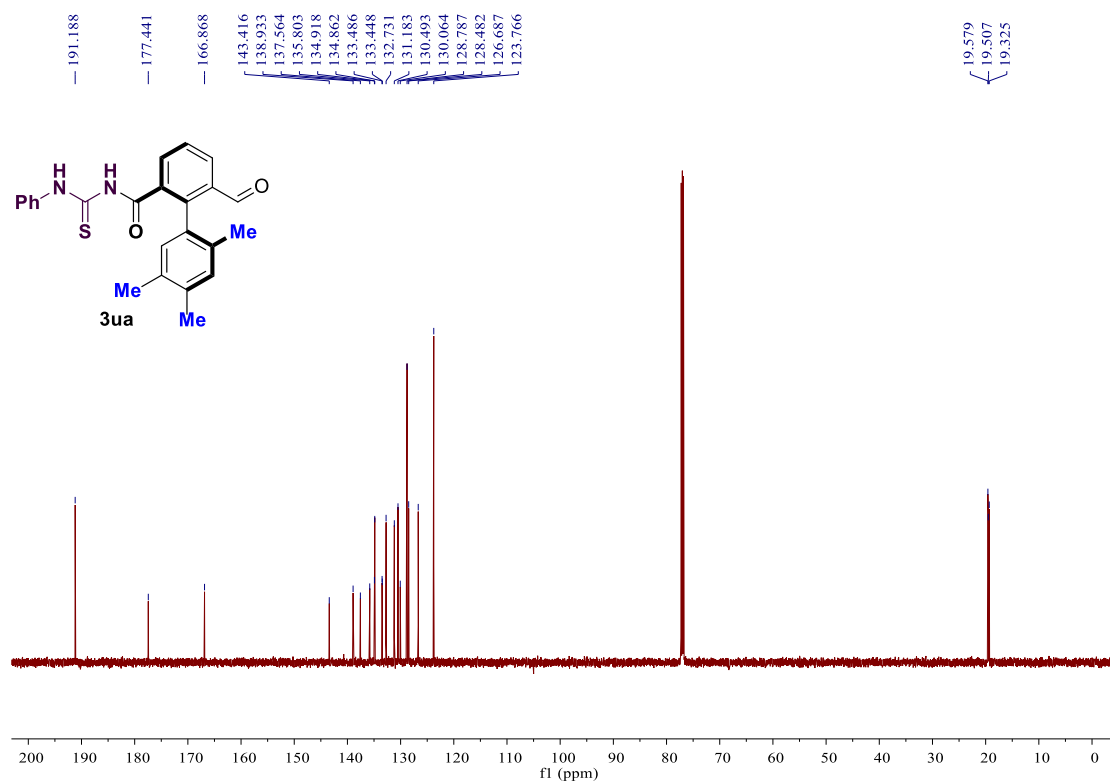

**<sup>13</sup>C NMR (150 MHz, CDCl<sub>3</sub>) spectrum of 3ua.**

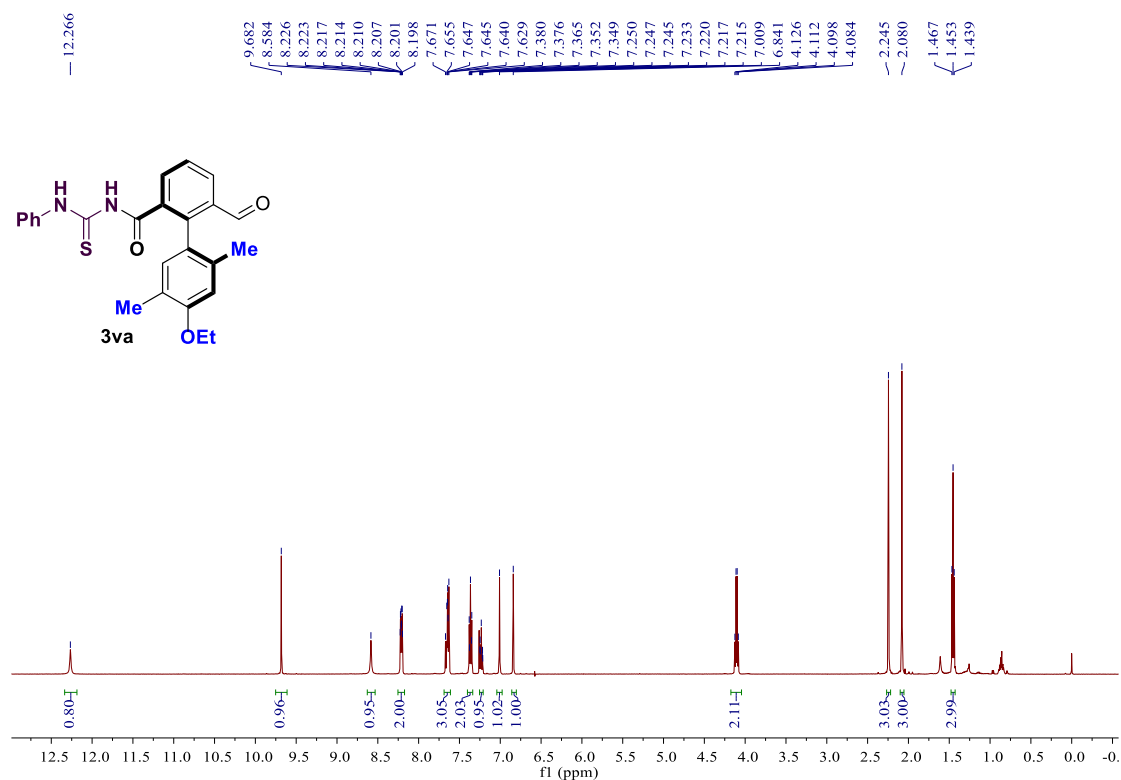

$^1\text{H}$  NMR (500 MHz,  $\text{CDCl}_3$ ) spectrum of 3va.

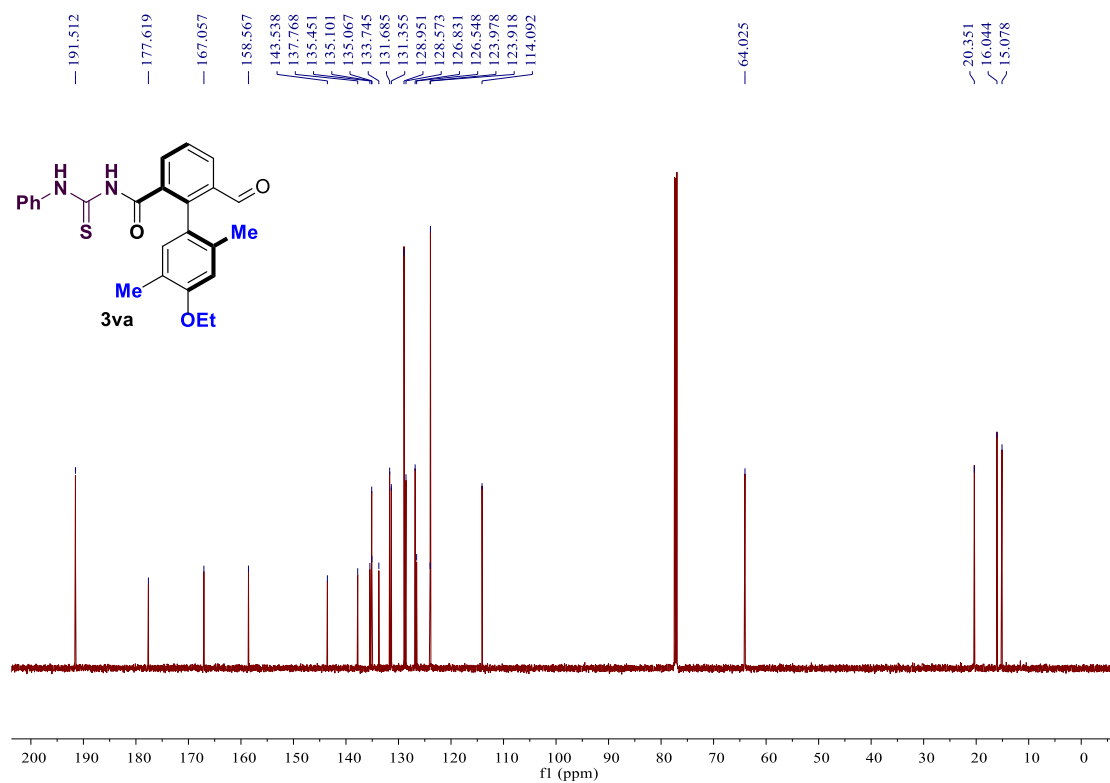

$^{13}\text{C}$  NMR (150 MHz,  $\text{CDCl}_3$ ) spectrum of 3va.

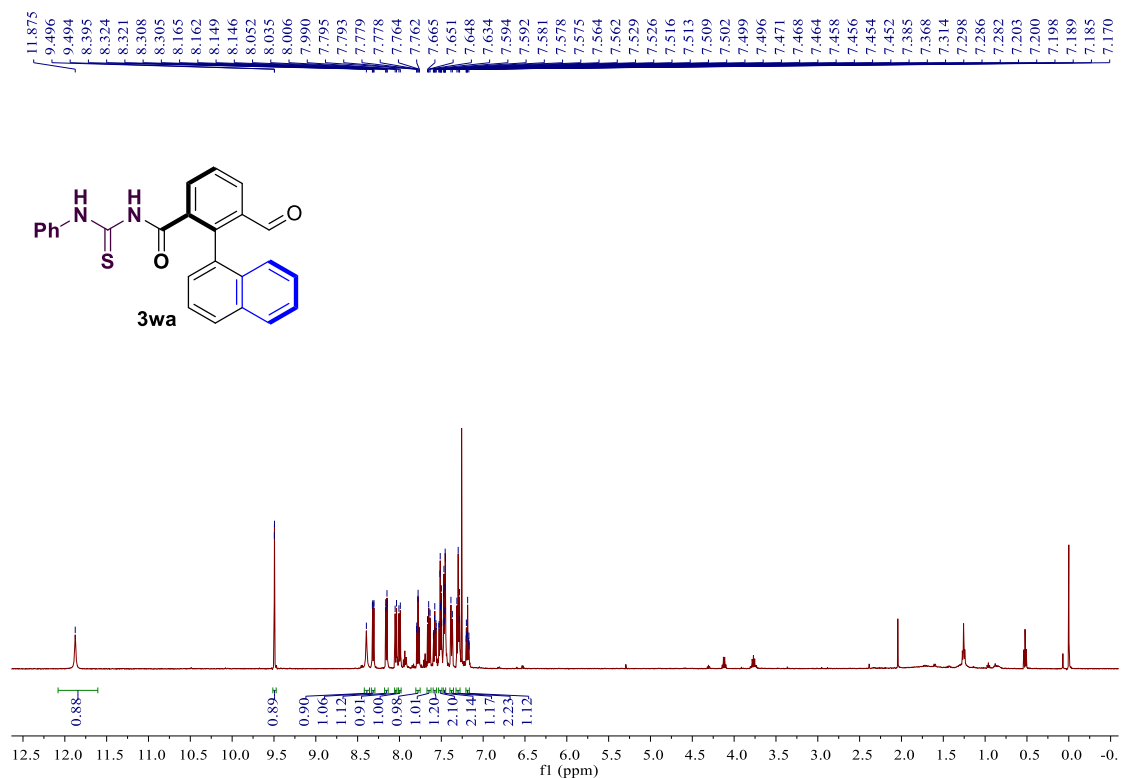

**<sup>1</sup>H NMR (500 MHz, CDCl<sub>3</sub>) spectrum of 3wa.**

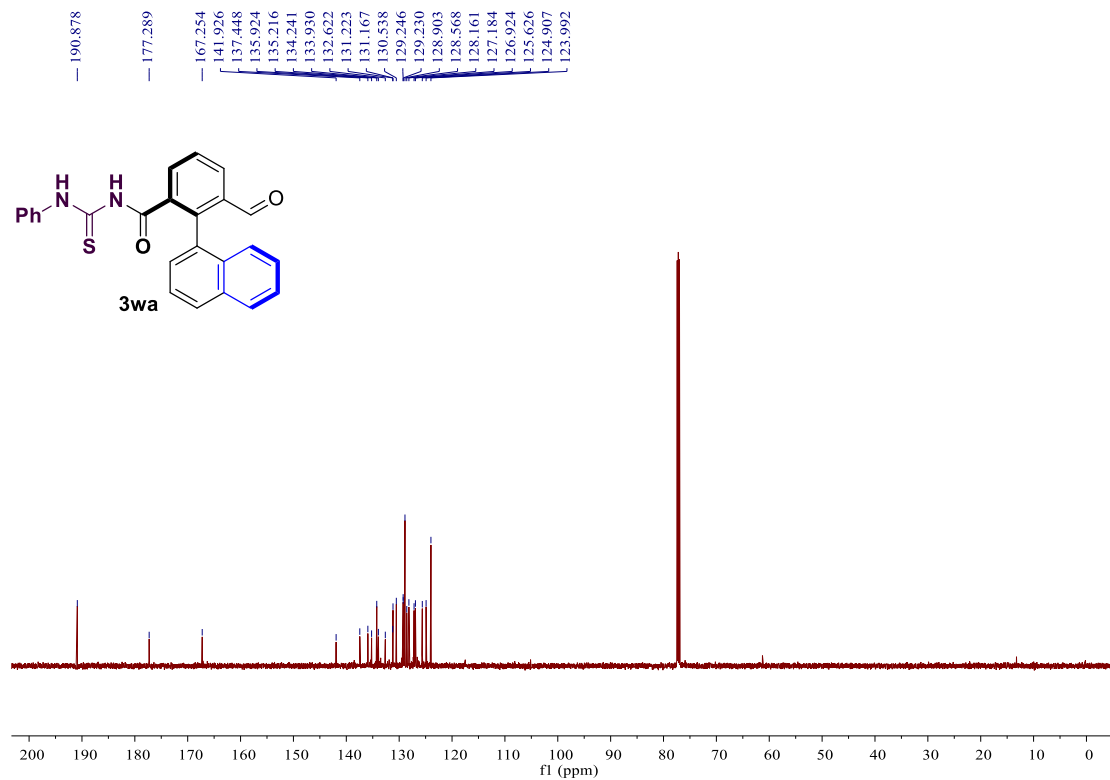

**<sup>13</sup>C NMR (150 MHz, CDCl<sub>3</sub>) spectrum of 3wa.**

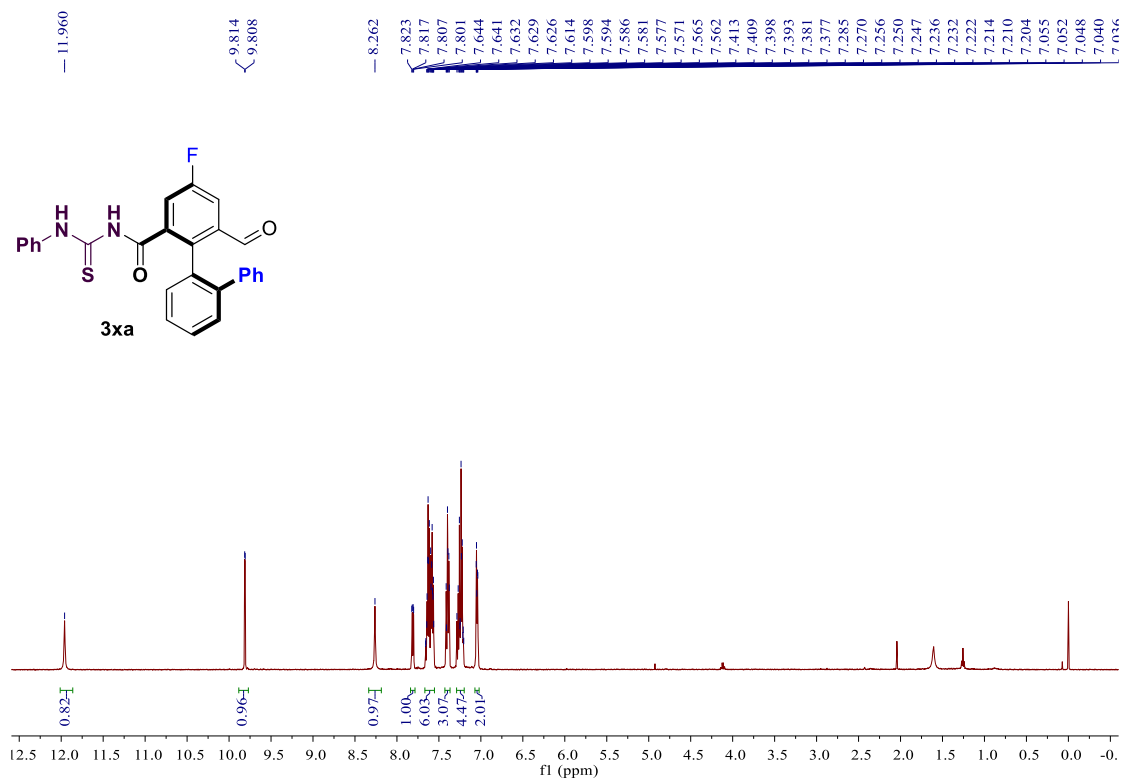

<sup>1</sup>H NMR (500 MHz, CDCl<sub>3</sub>) spectrum of 3xa.

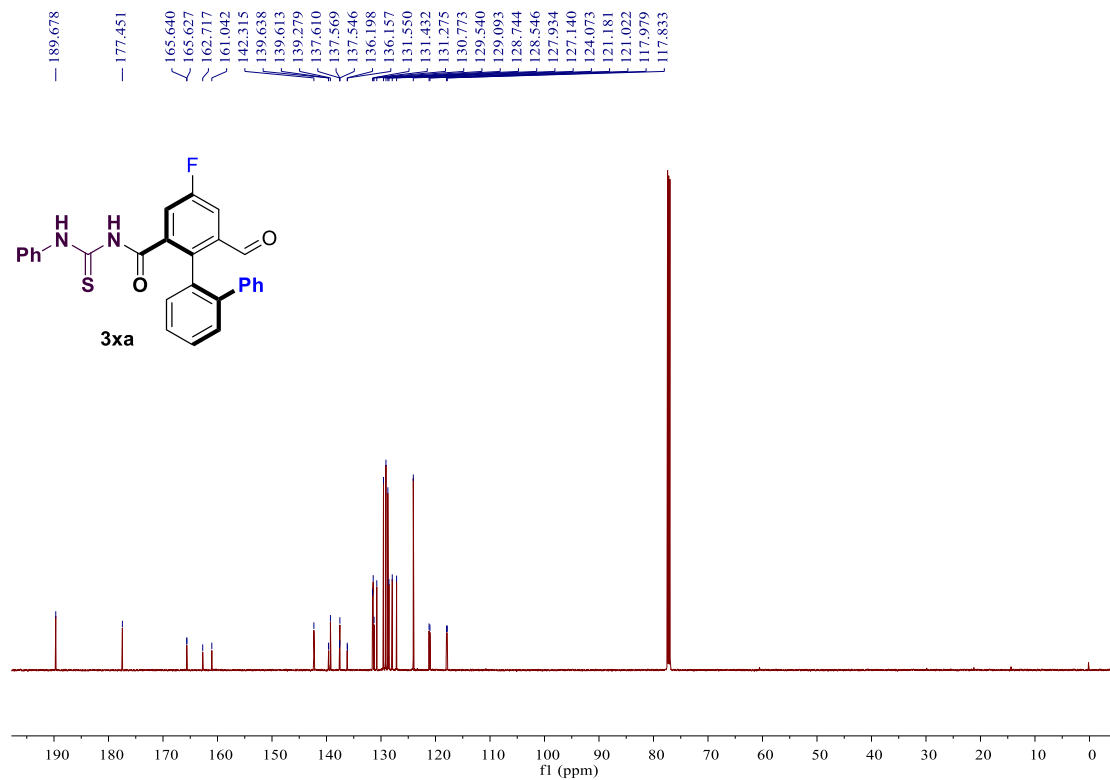

<sup>13</sup>C NMR (150 MHz, CDCl<sub>3</sub>) spectrum of 3xa.

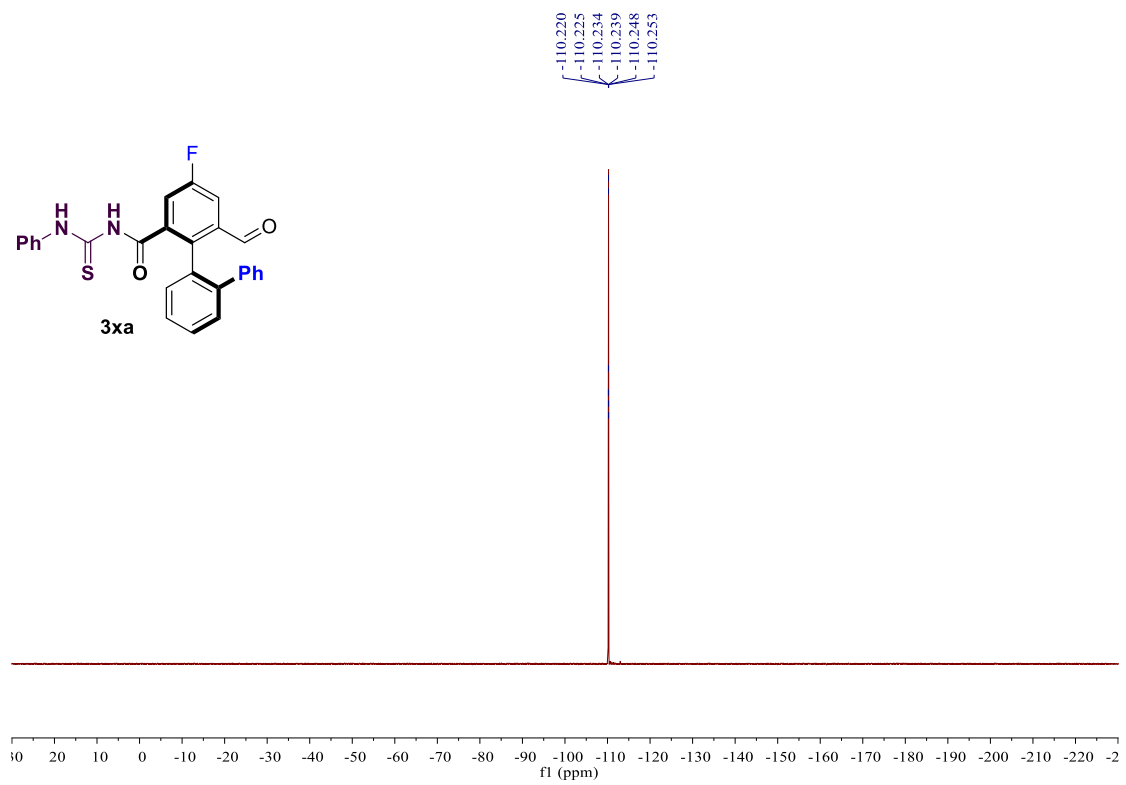

**$^{19}\text{F}$  NMR (565 MHz,  $\text{CDCl}_3$ ) spectrum of **3xa**.**



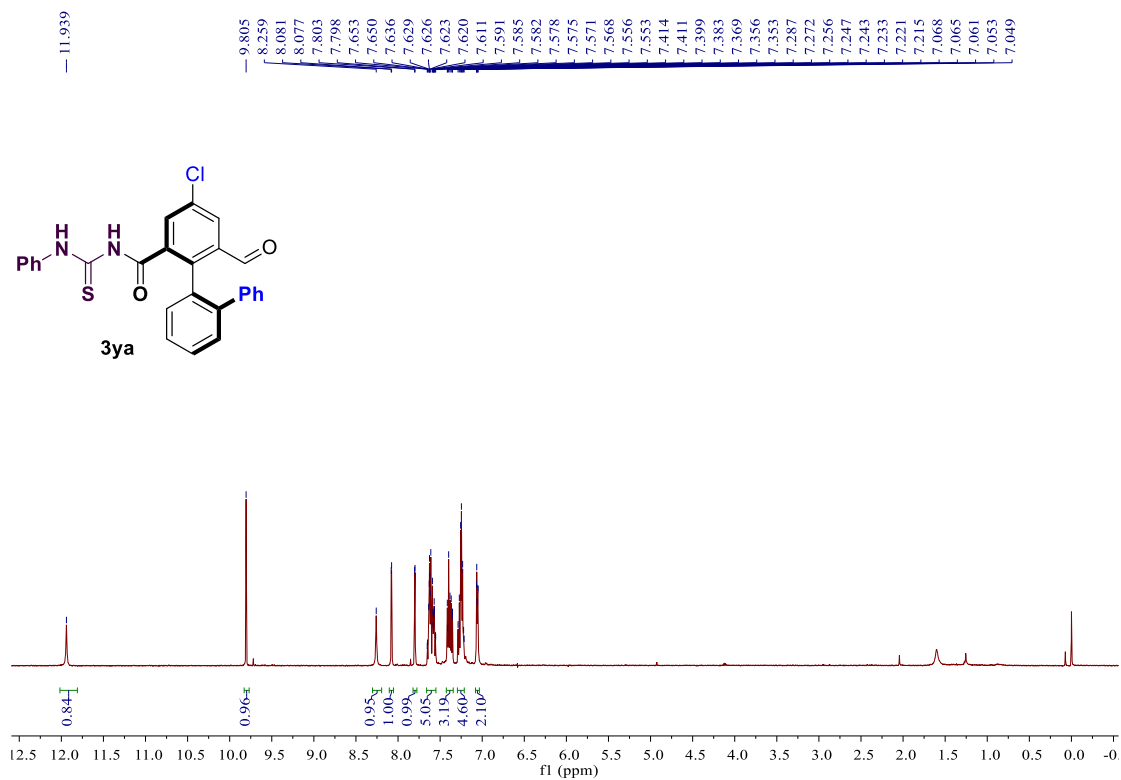

**<sup>1</sup>H NMR (500 MHz, CDCl<sub>3</sub>) spectrum of 3ya.**

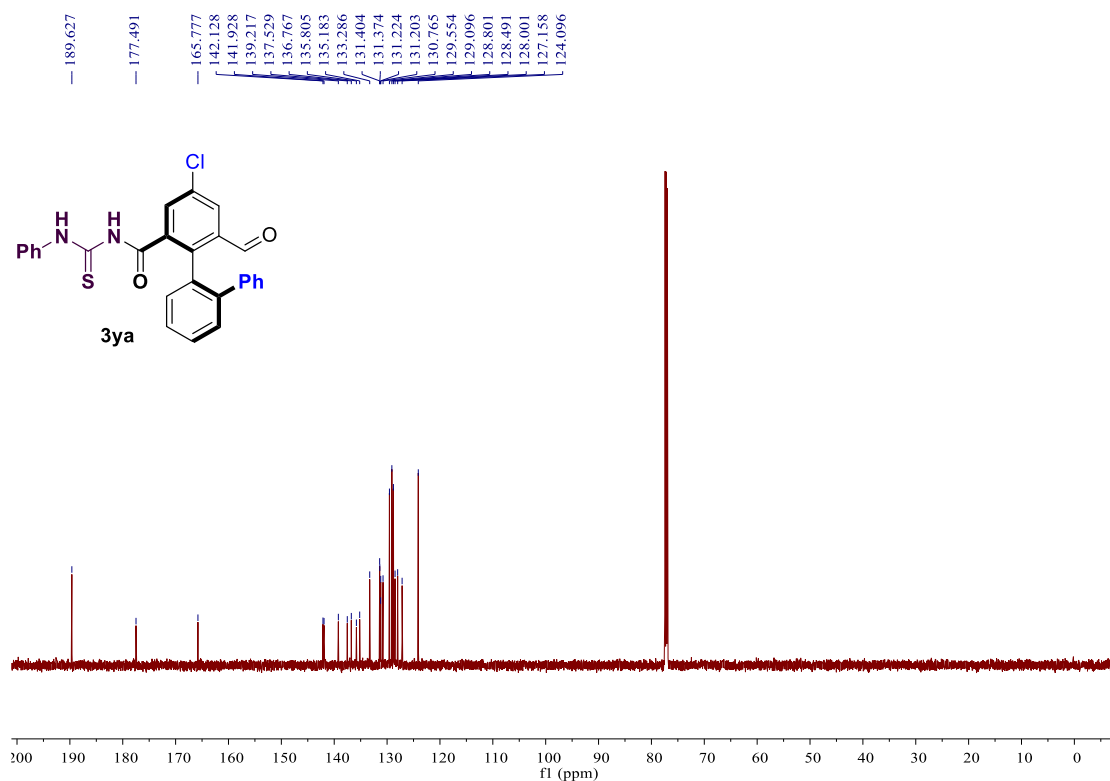

**<sup>13</sup>C NMR (150 MHz, CDCl<sub>3</sub>) spectrum of 3ya.**

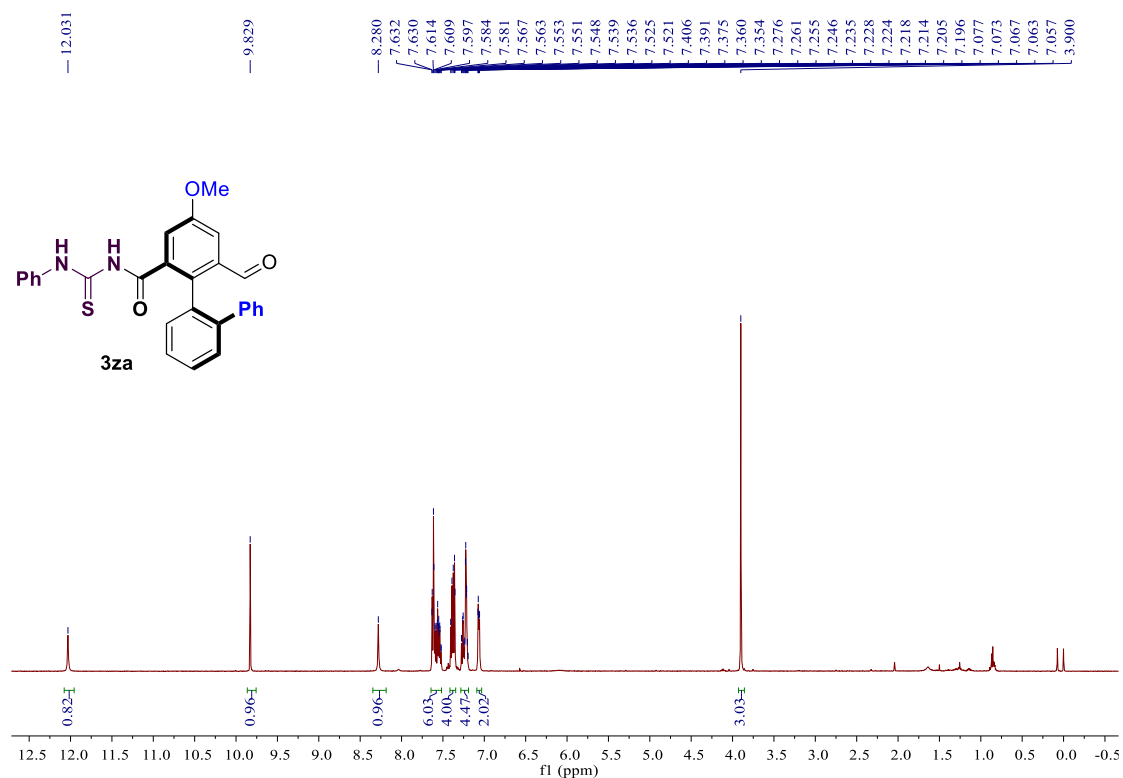

**<sup>1</sup>H NMR (500 MHz, CDCl<sub>3</sub>) spectrum of 3za.**

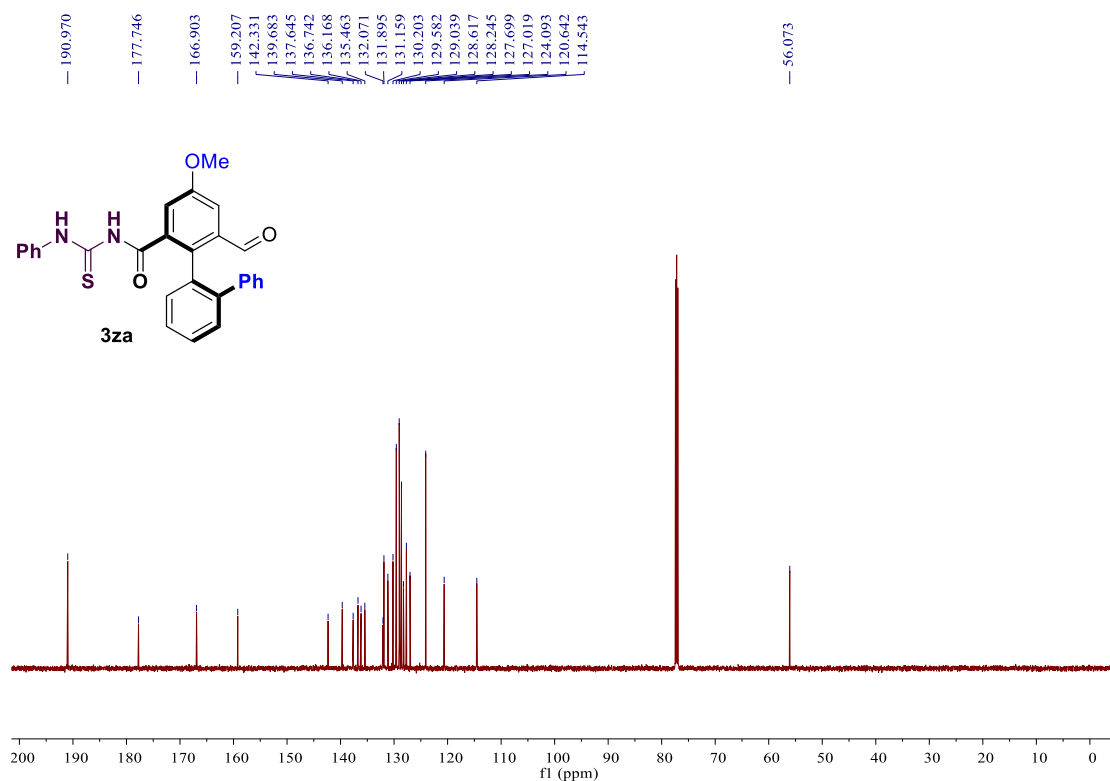

**<sup>13</sup>C NMR (150 MHz, CDCl<sub>3</sub>) spectrum of 3za.**

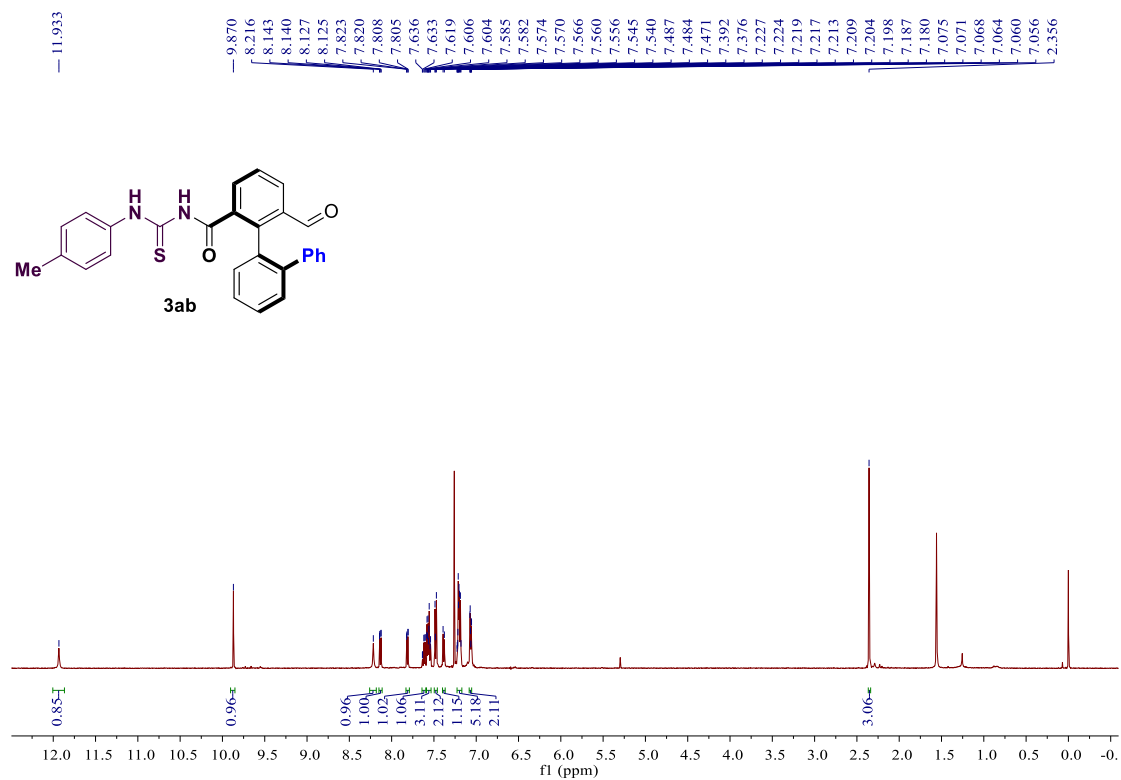

<sup>1</sup>H NMR (500 MHz, CDCl<sub>3</sub>) spectrum of **3ab**.

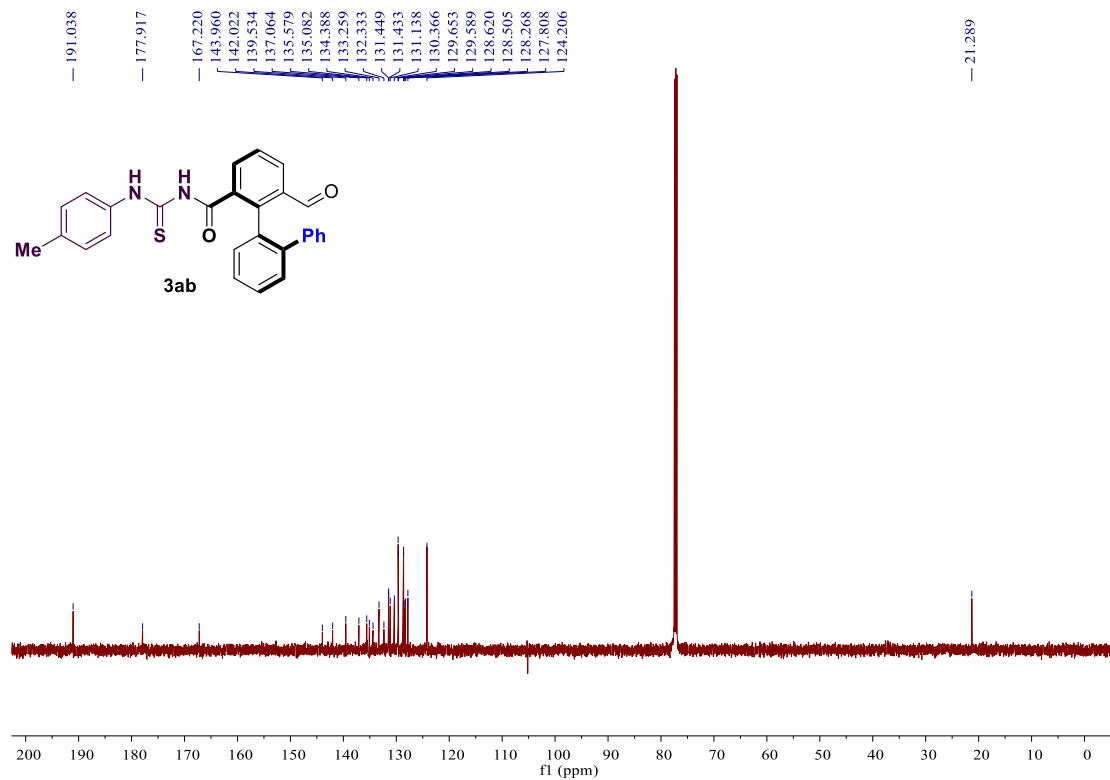

<sup>13</sup>C NMR (150 MHz, CDCl<sub>3</sub>) spectrum of **3ab**.

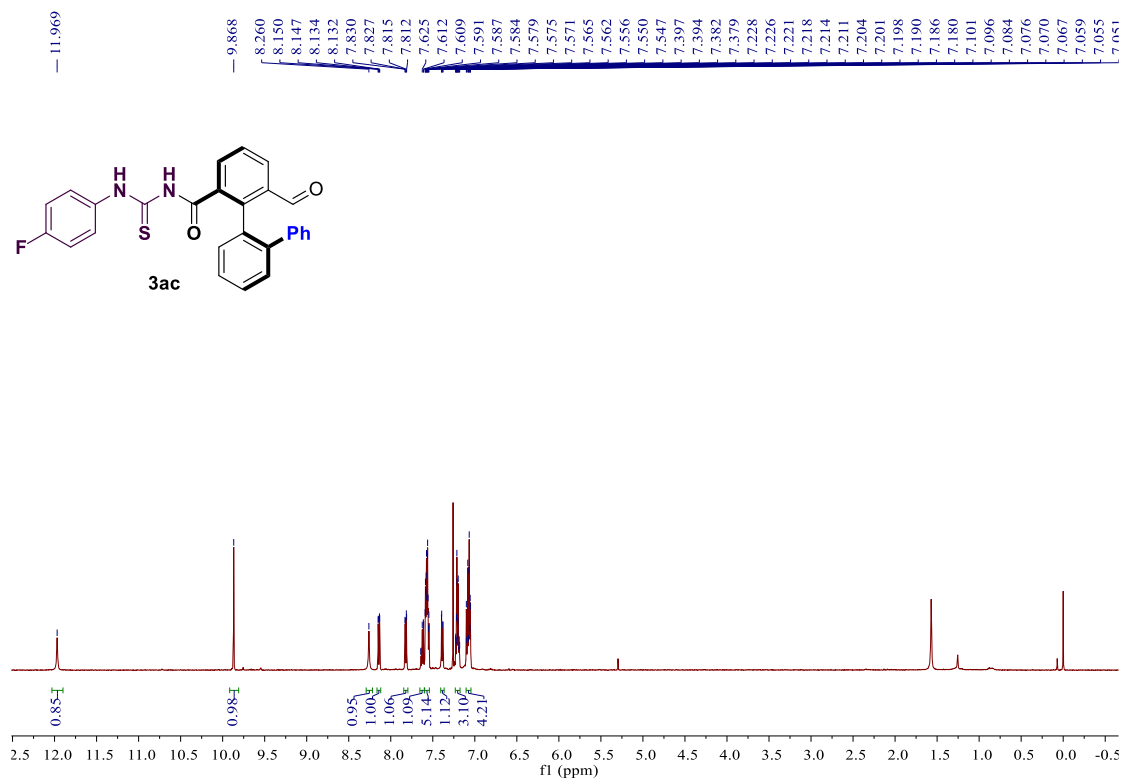

$^1\text{H}$  NMR (500 MHz,  $\text{CDCl}_3$ ) spectrum of **3ac**.

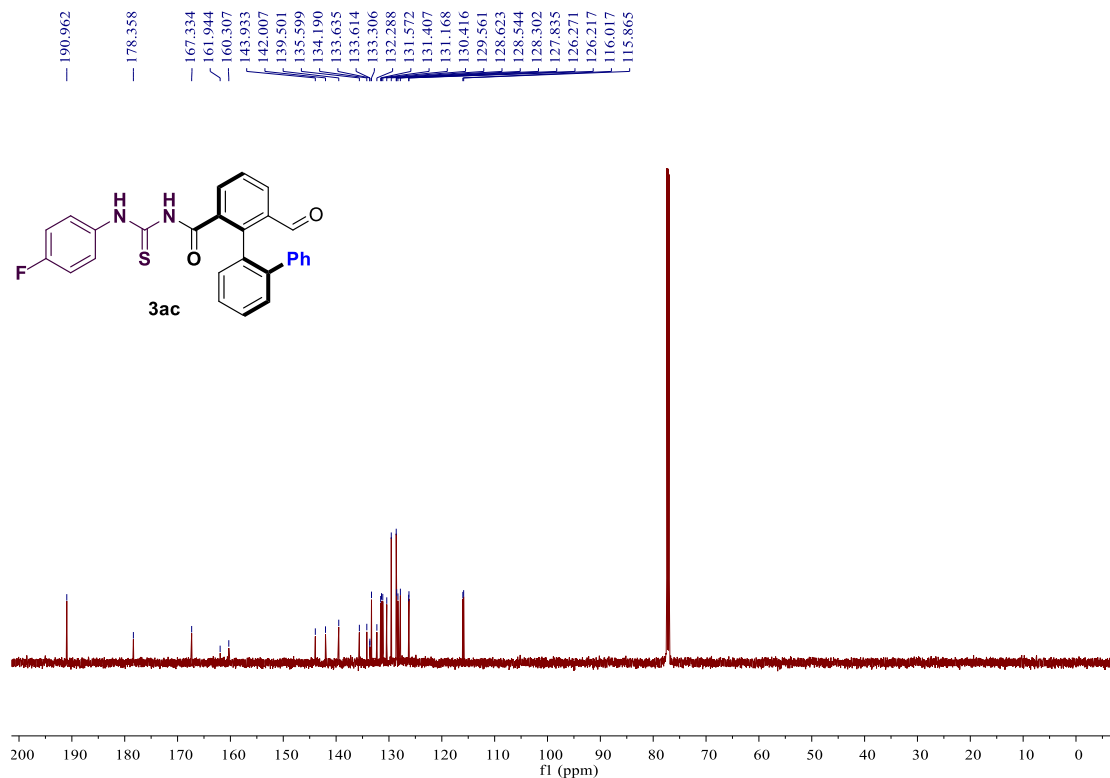

$^{13}\text{C}$  NMR (150 MHz,  $\text{CDCl}_3$ ) spectrum of **3ac**.

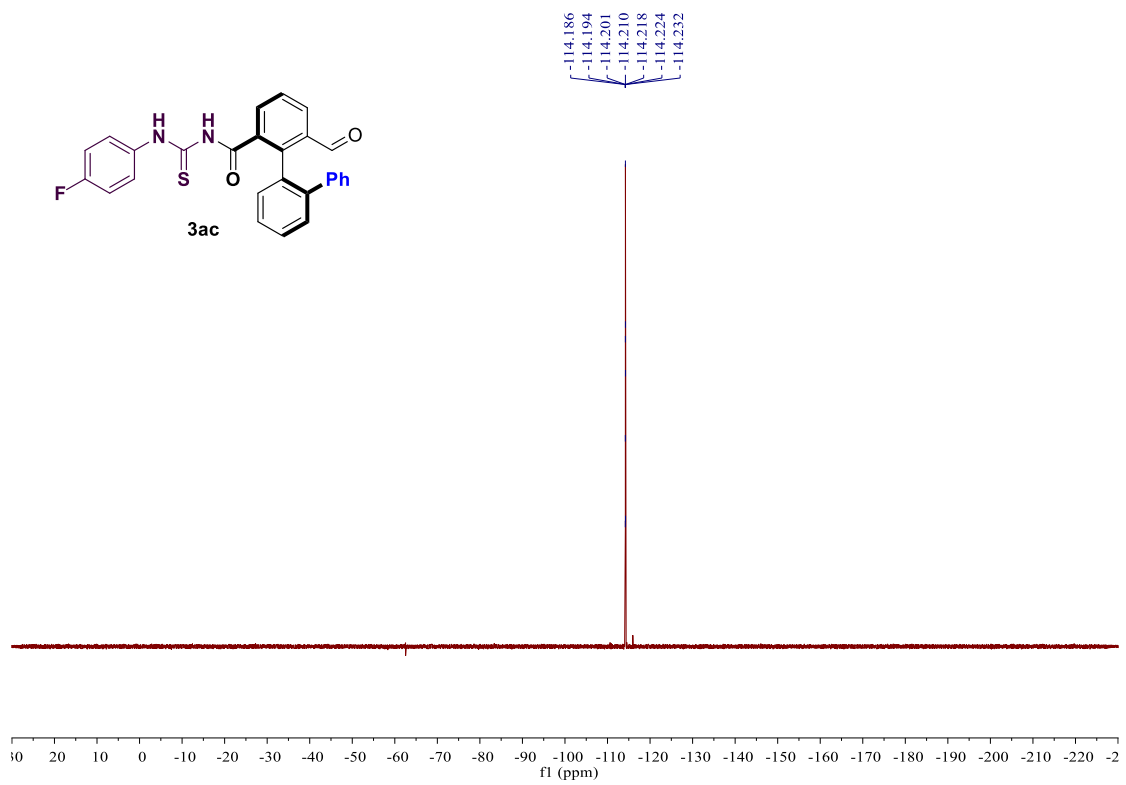

**$^{19}\text{F}$  NMR (565 MHz,  $\text{CDCl}_3$ ) spectrum of **3ac**.**

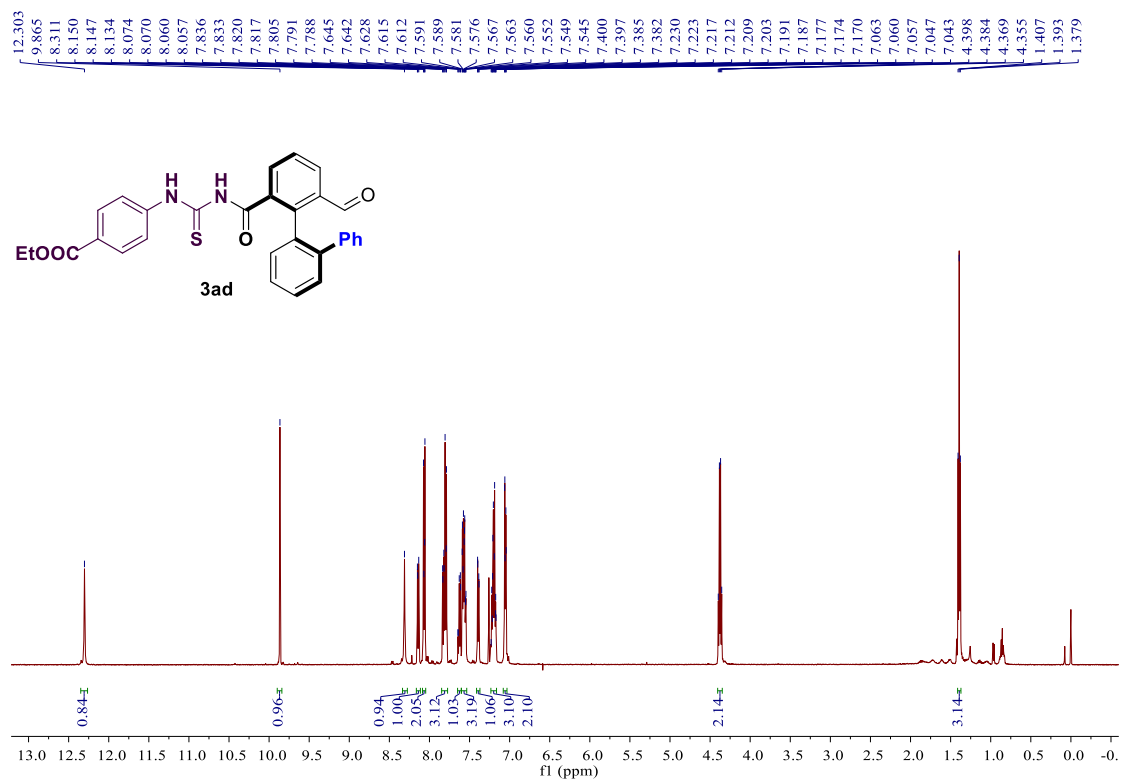

<sup>1</sup>H NMR (500 MHz, CDCl<sub>3</sub>) spectrum of 3ad.

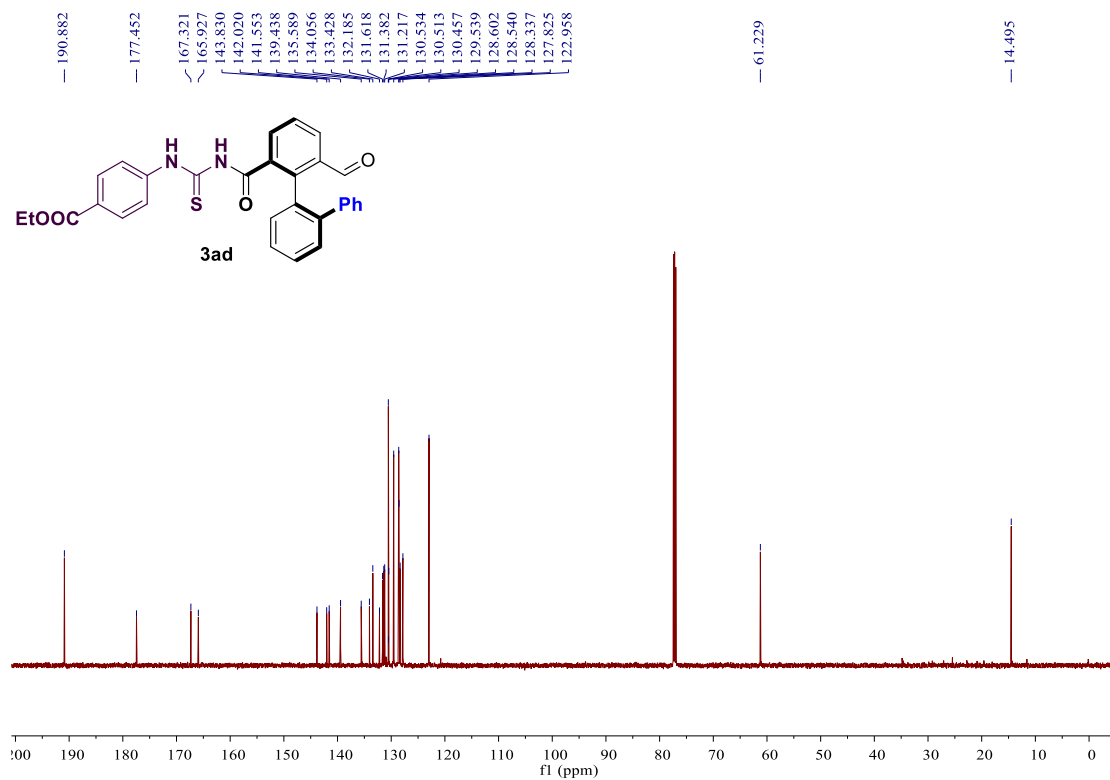

<sup>13</sup>C NMR (150 MHz, CDCl<sub>3</sub>) spectrum of 3ad.

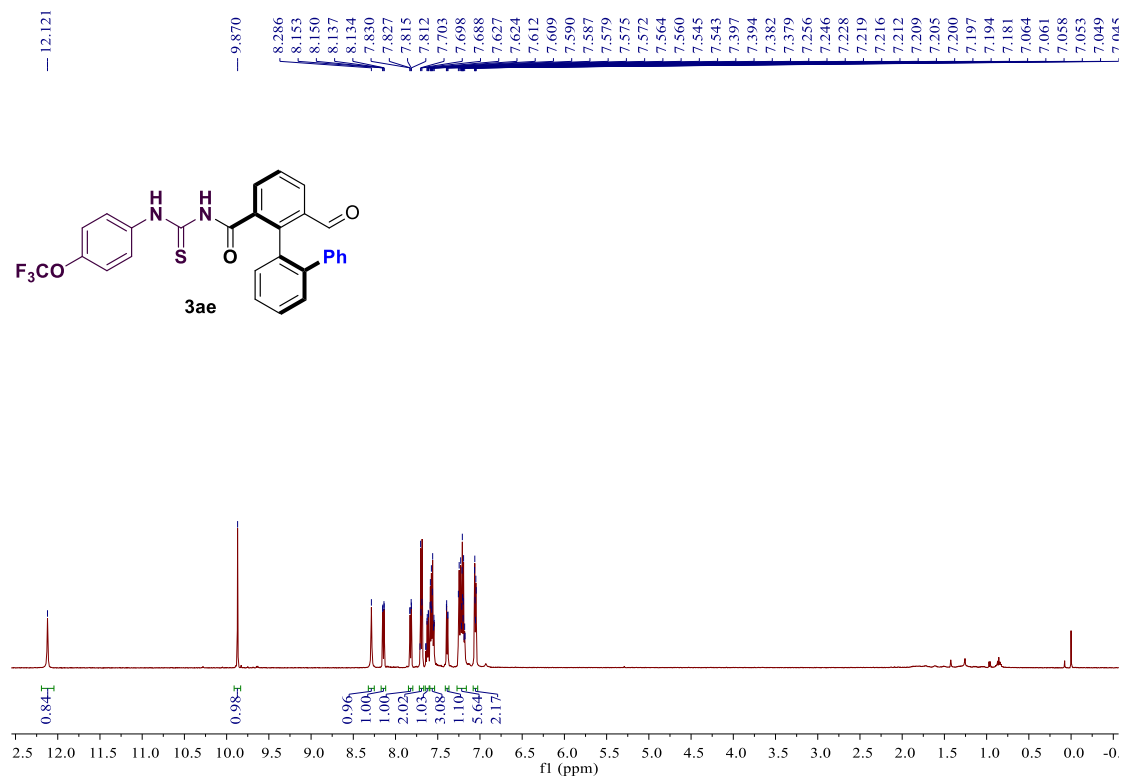

$^1\text{H}$  NMR (500 MHz,  $\text{CDCl}_3$ ) spectrum of **3ae**.

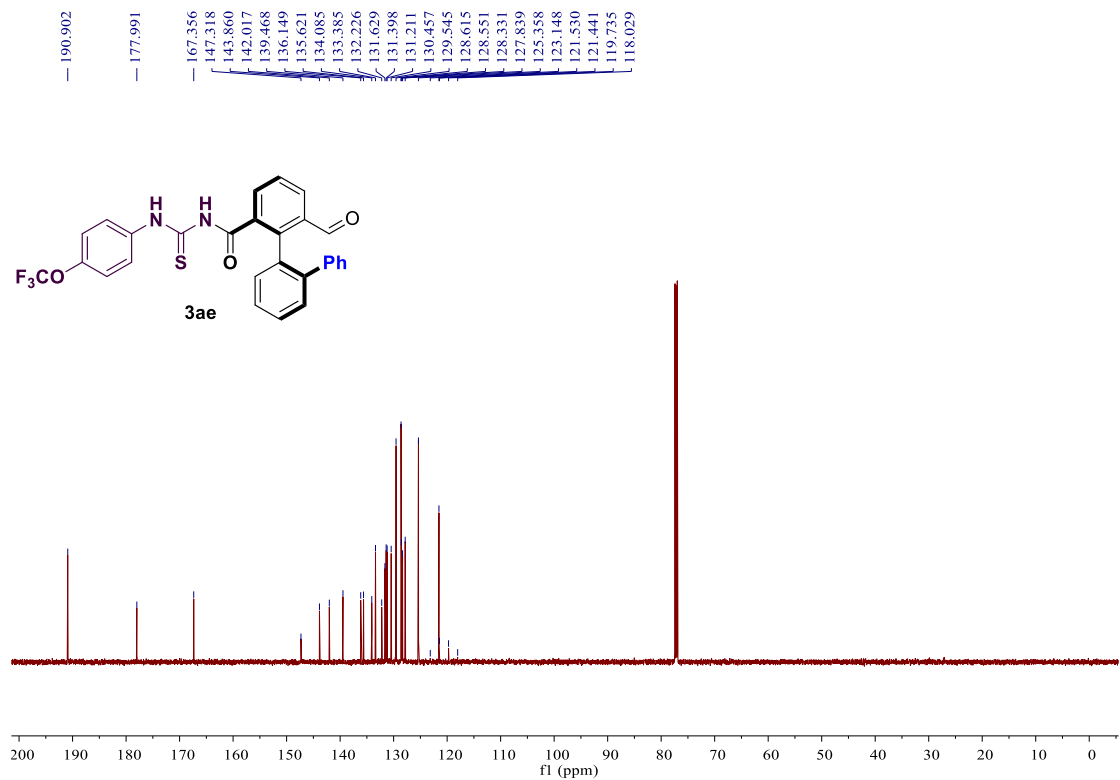

$^{13}\text{C}$  NMR (150 MHz,  $\text{CDCl}_3$ ) spectrum of **3ae**.

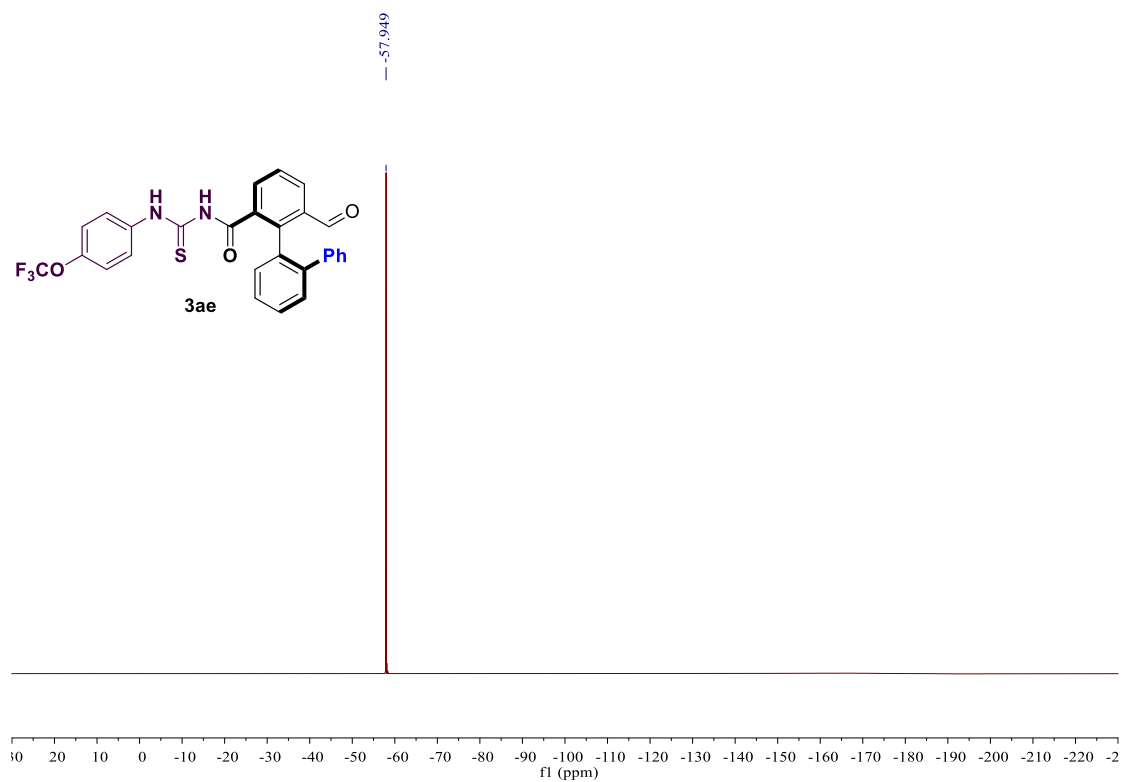

**$^{19}\text{F}$  NMR (565 MHz,  $\text{CDCl}_3$ ) spectrum of **3ae**.**



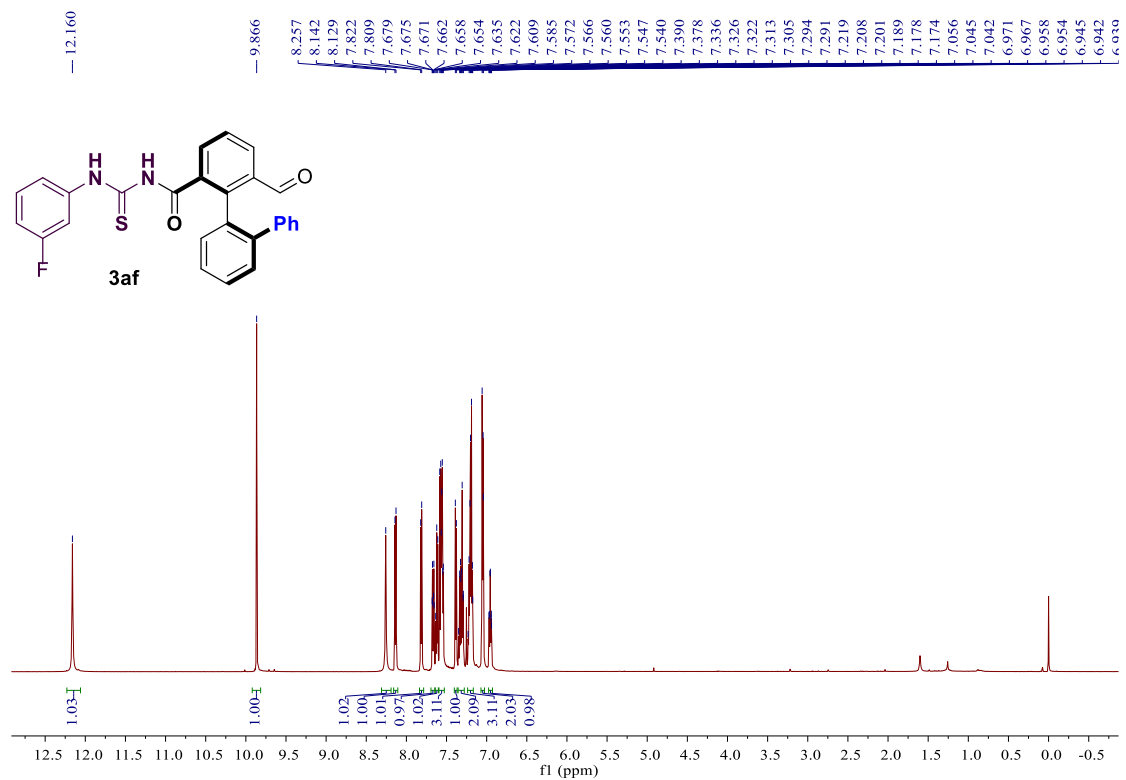

<sup>1</sup>H NMR (600 MHz, CDCl<sub>3</sub>) spectrum of 3af.

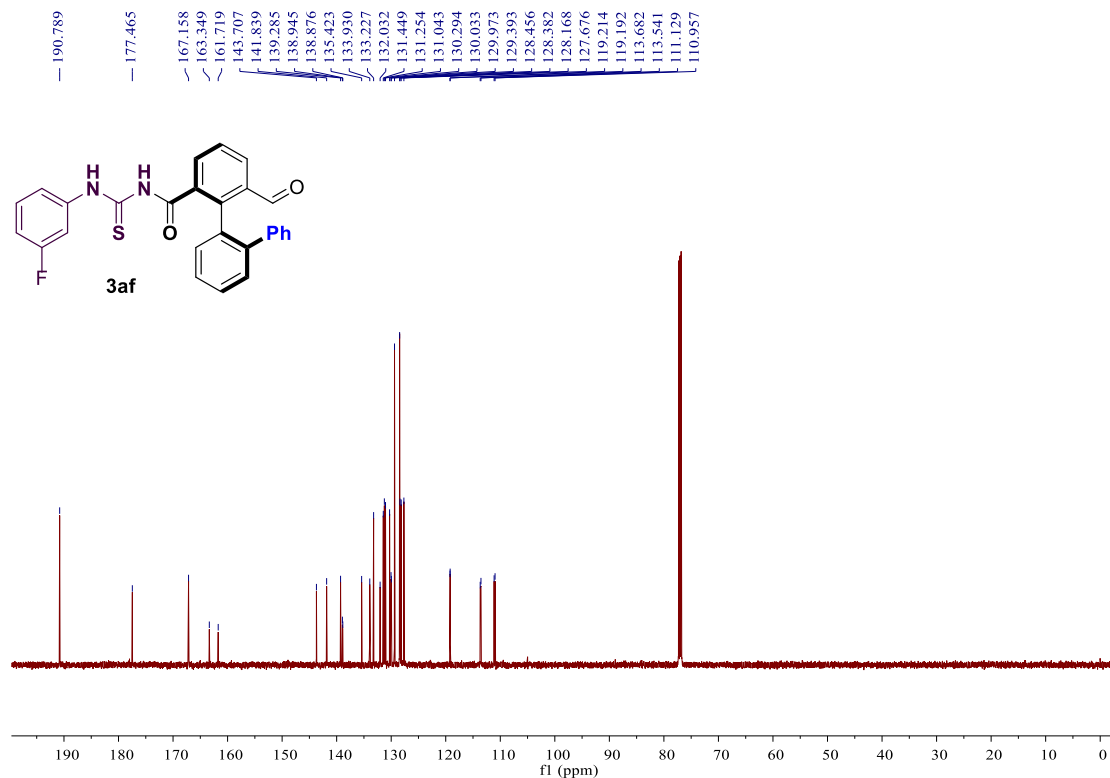

<sup>13</sup>C NMR (150 MHz, CDCl<sub>3</sub>) spectrum of 3af.

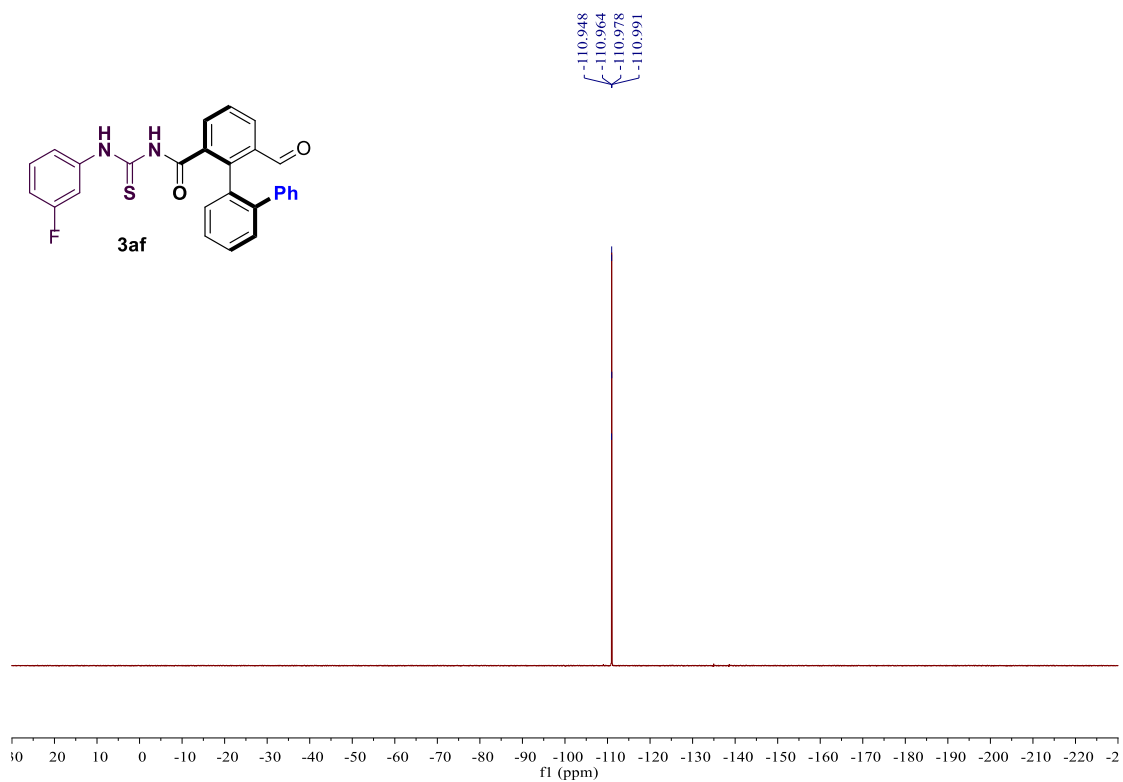

**$^{19}\text{F}$  NMR (565 MHz,  $\text{CDCl}_3$ ) spectrum of **3af**.**

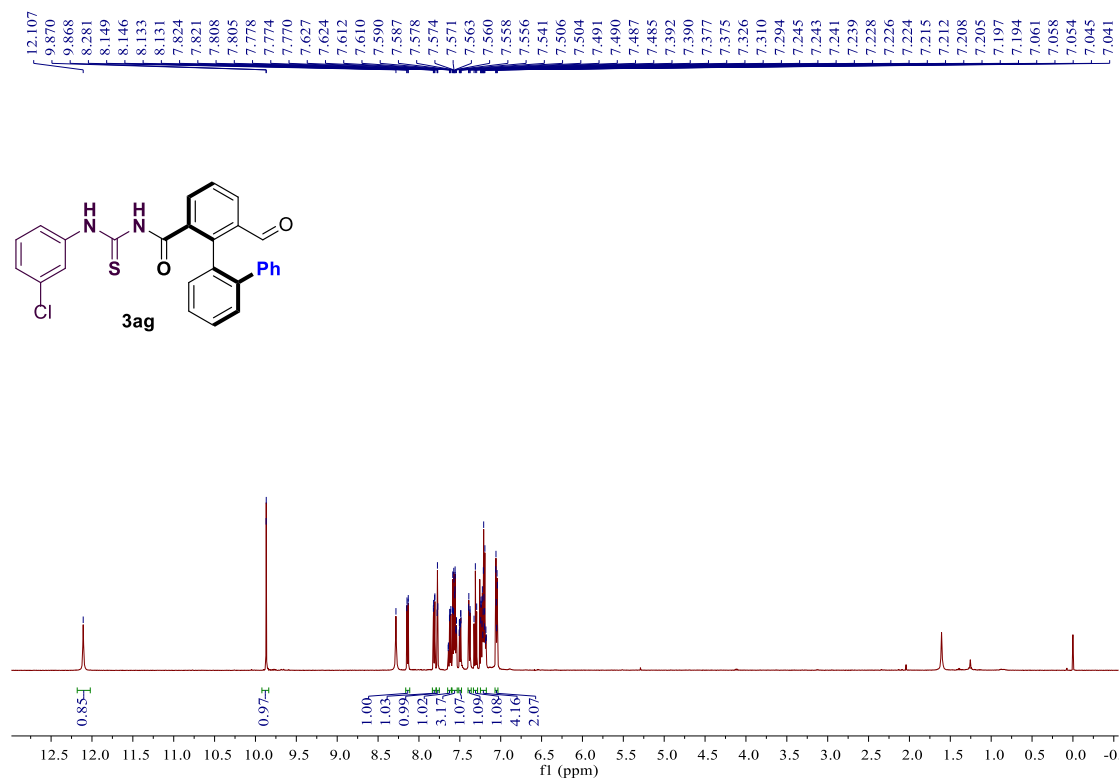

**<sup>1</sup>H NMR (500 MHz, CDCl<sub>3</sub>) spectrum of 3ag.**

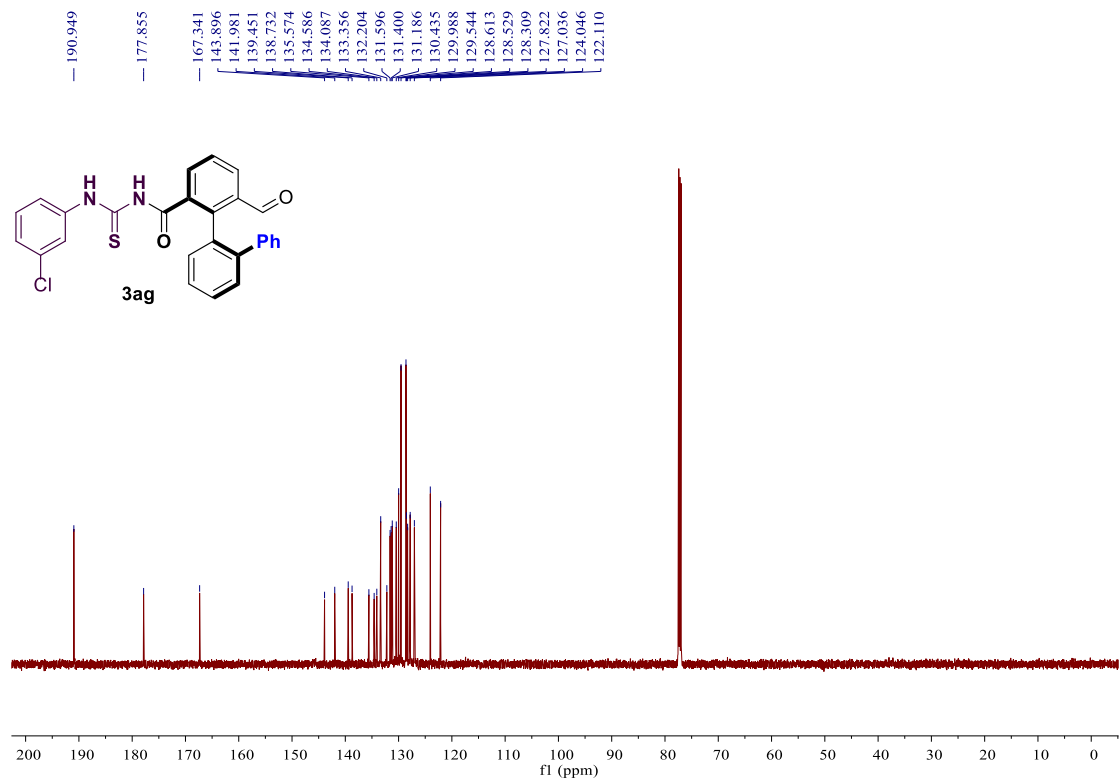

**<sup>13</sup>C NMR (150 MHz, CDCl<sub>3</sub>) spectrum of 3ag.**

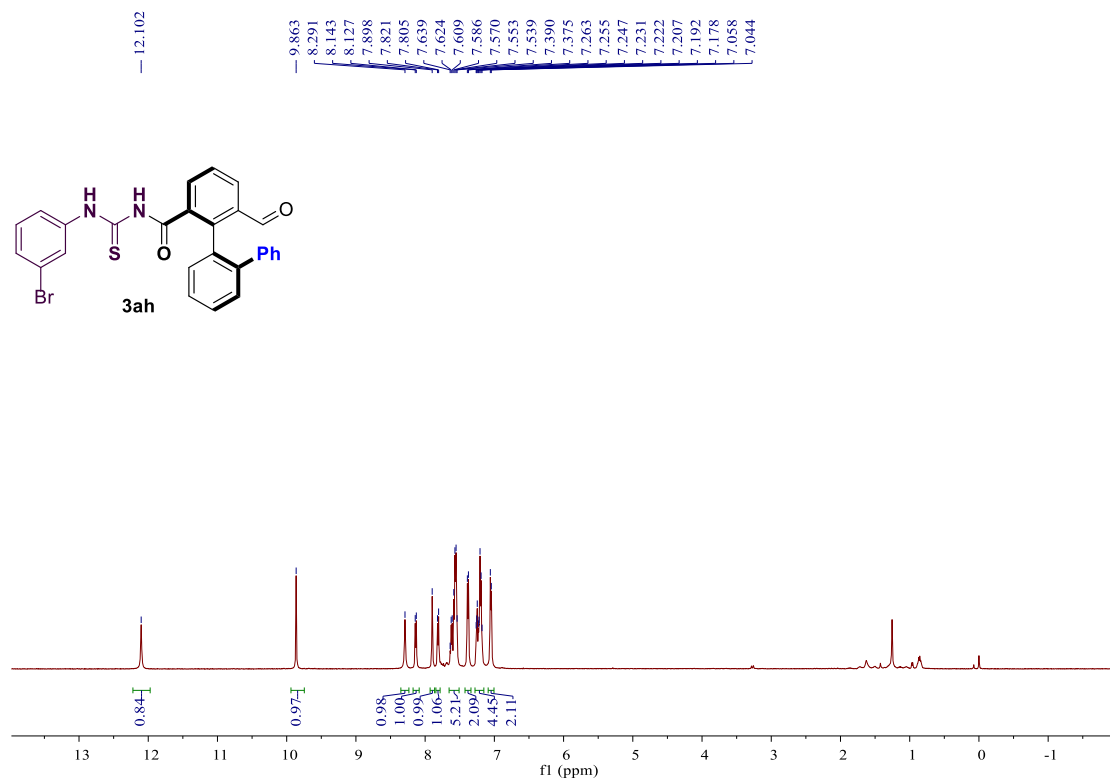

<sup>1</sup>H NMR (500 MHz, CDCl<sub>3</sub>) spectrum of 3ah.

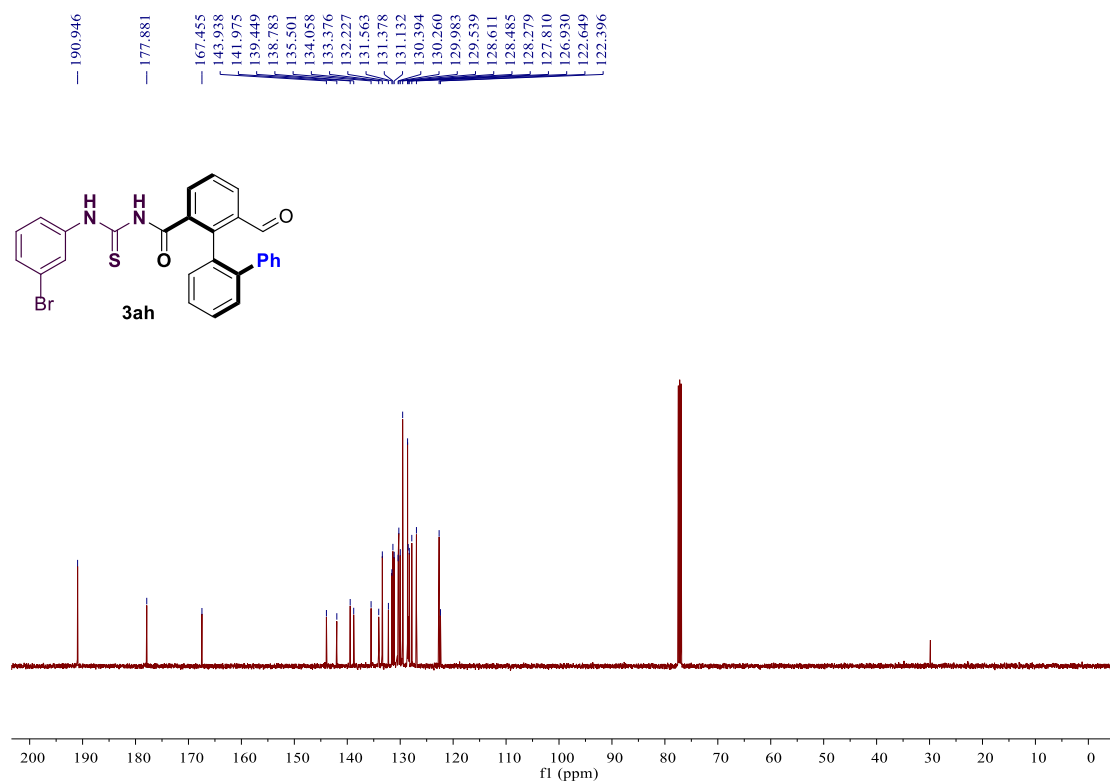

<sup>13</sup>C NMR (150 MHz, CDCl<sub>3</sub>) spectrum of 3ah.

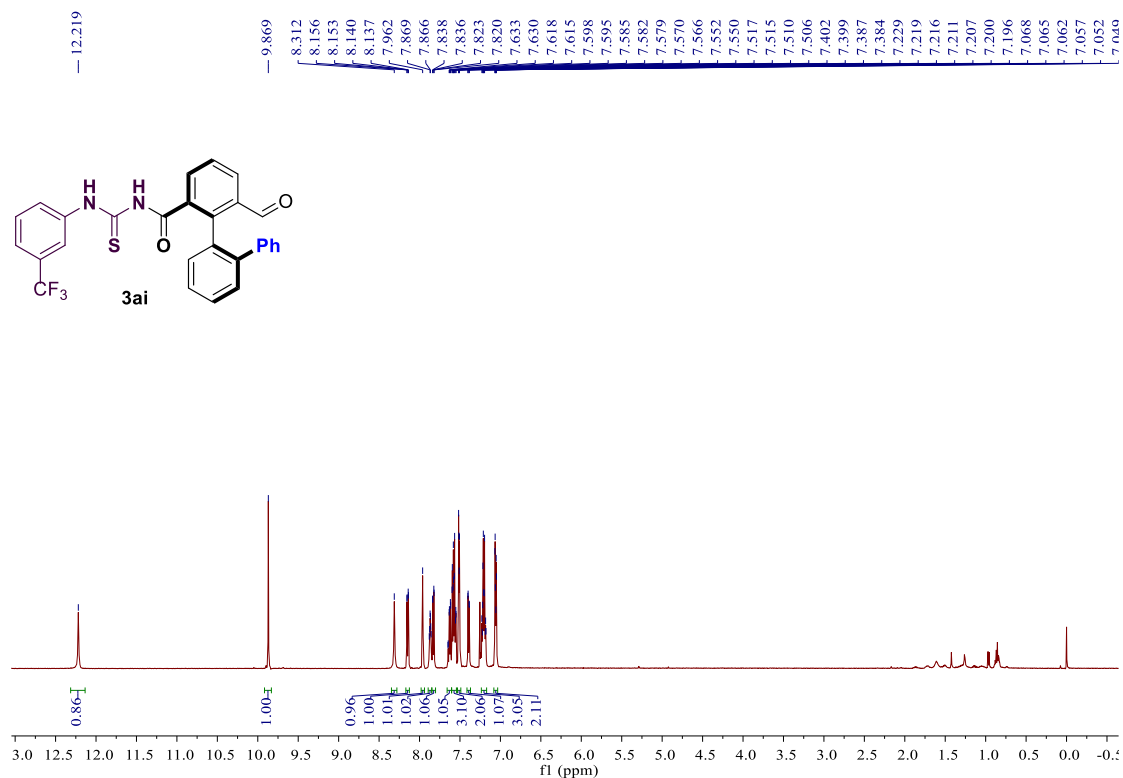

**$^1\text{H}$  NMR (500 MHz,  $\text{CDCl}_3$ ) spectrum of **3ai**.**

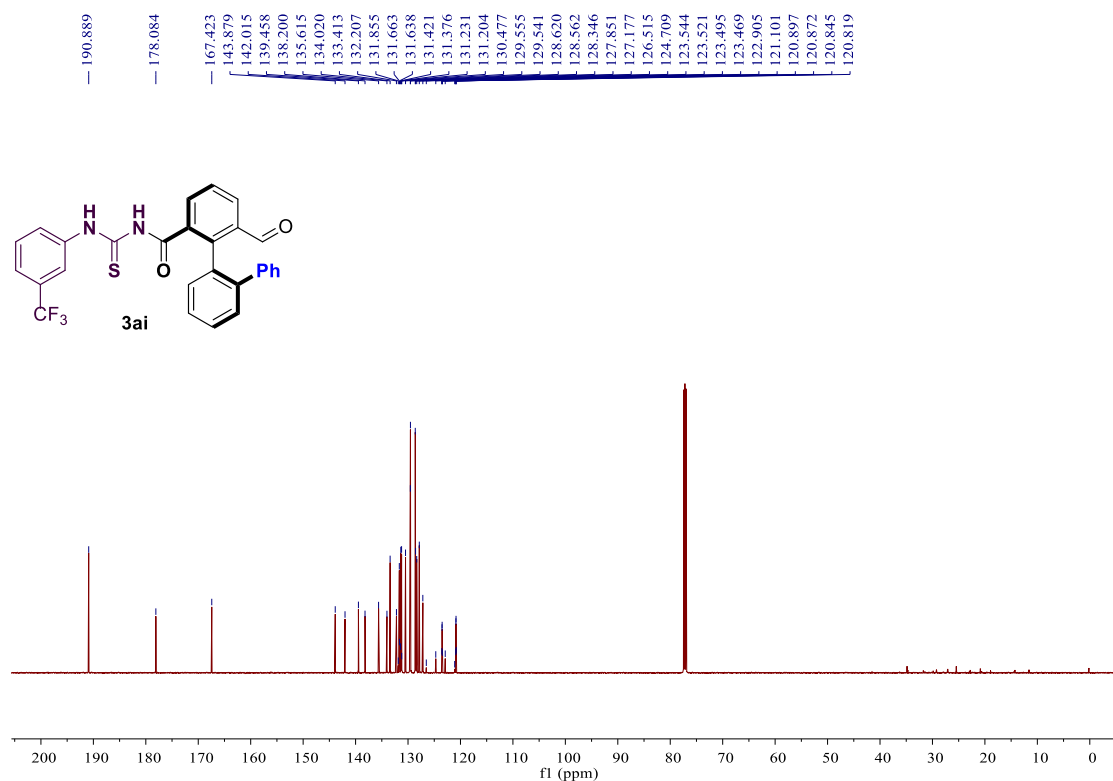

**$^{13}\text{C}$  NMR (150 MHz,  $\text{CDCl}_3$ ) spectrum of **3ai**.**

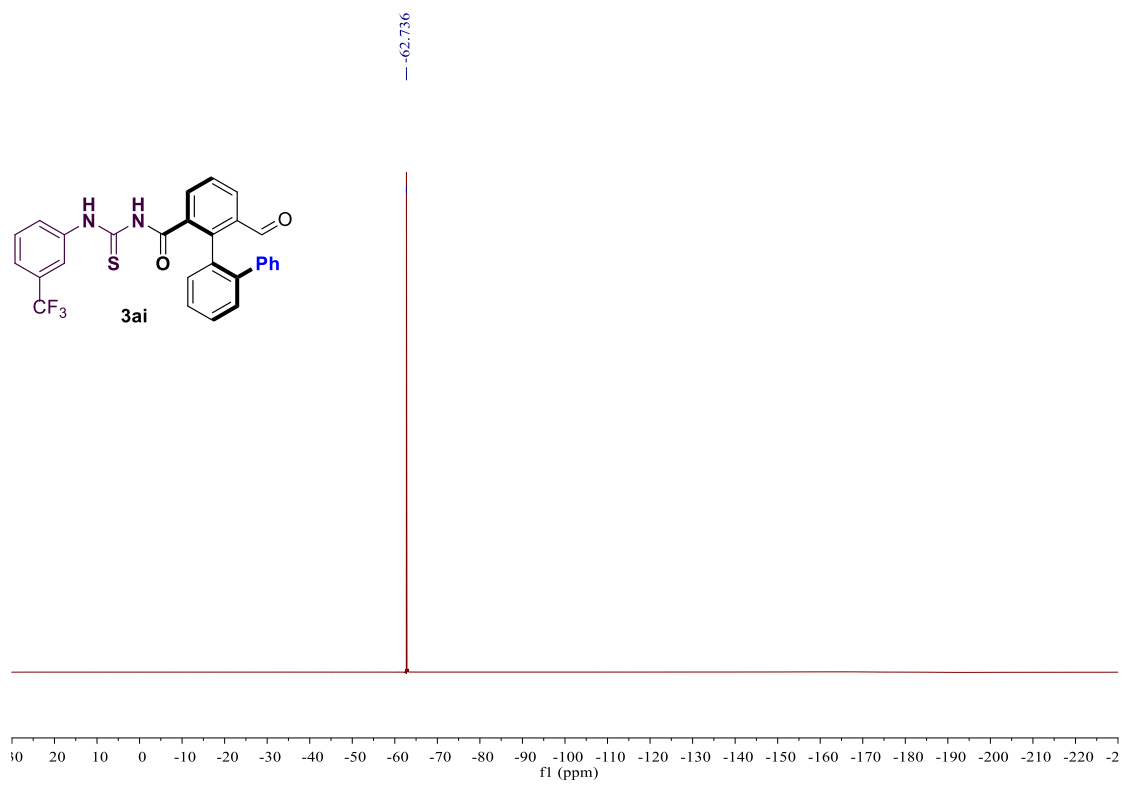

**$^{19}\text{F}$  NMR (565 MHz,  $\text{CDCl}_3$ ) spectrum of 3ai.**

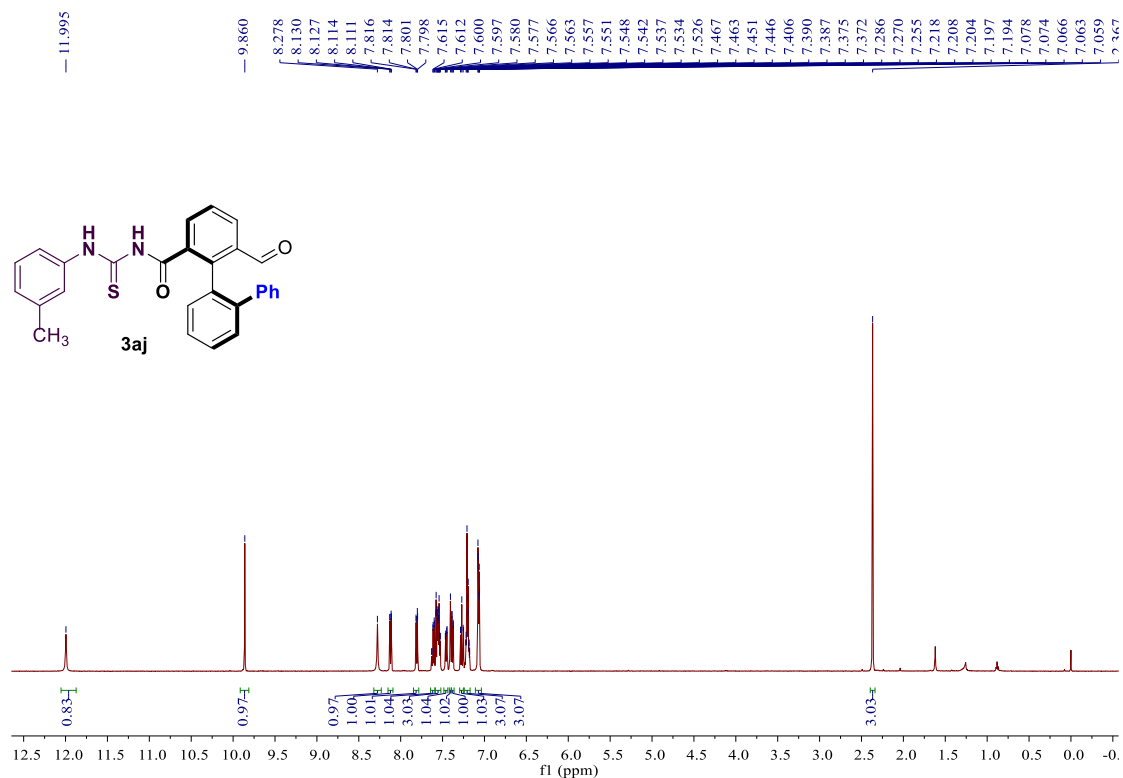

**<sup>1</sup>H NMR (500 MHz, CDCl<sub>3</sub>) spectrum of 3aj.**

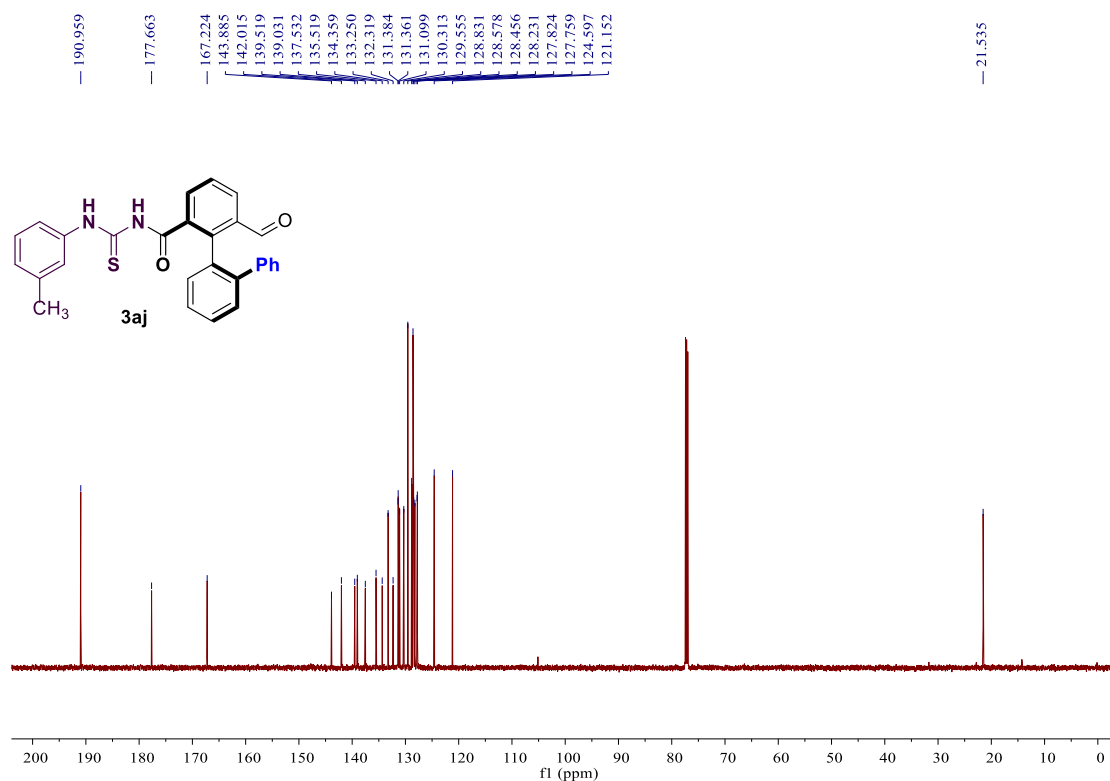

**<sup>13</sup>C NMR (150 MHz, CDCl<sub>3</sub>) spectrum of 3aj.**

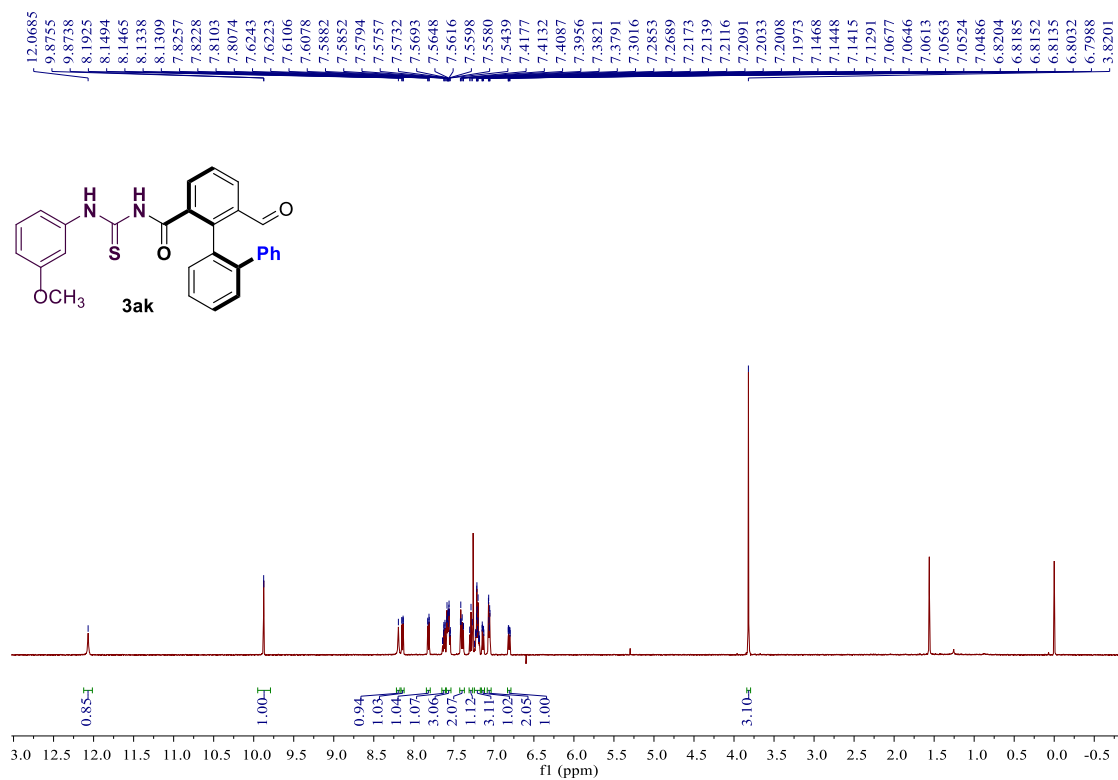

**<sup>1</sup>H NMR (500 MHz, CDCl<sub>3</sub>) spectrum of 3ak.**

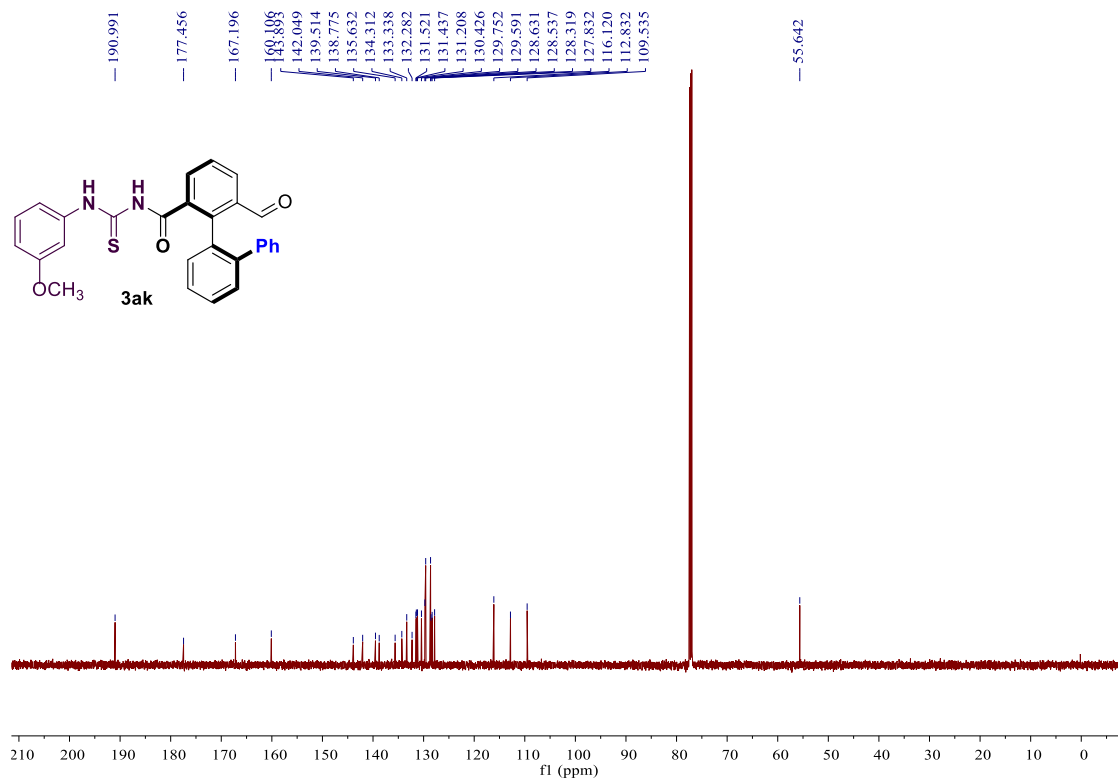

**<sup>13</sup>C NMR (150 MHz, CDCl<sub>3</sub>) spectrum of 3ak.**



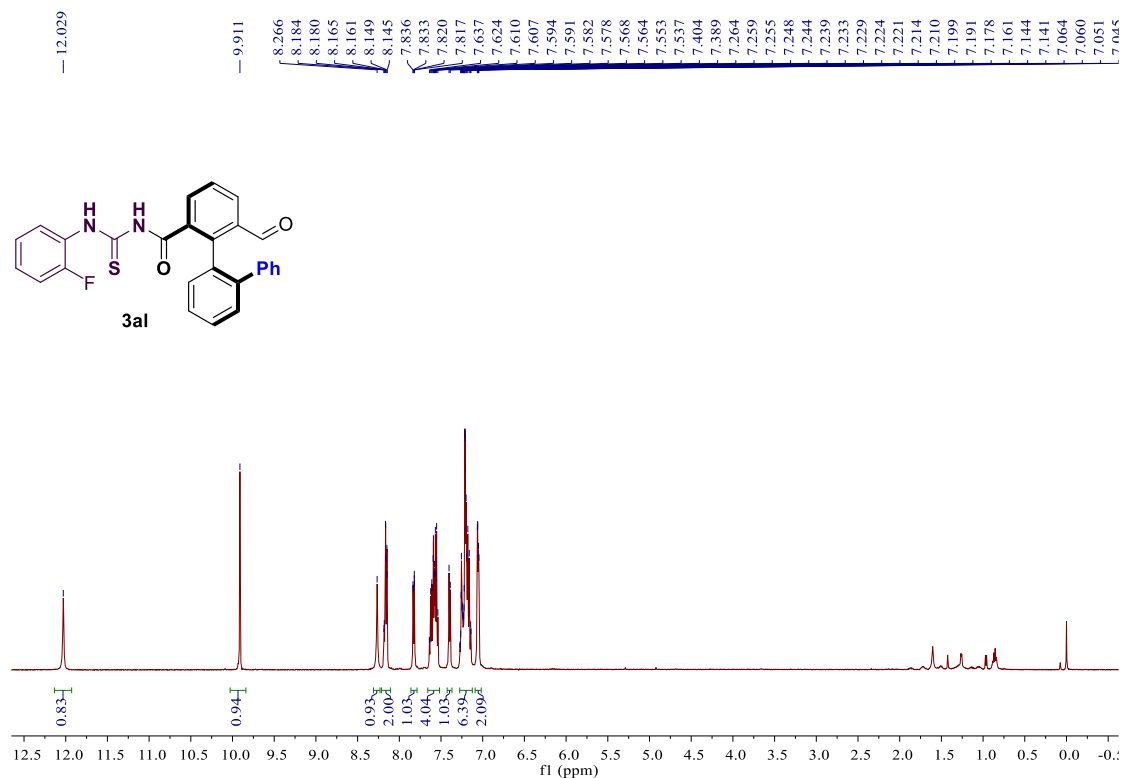

**<sup>1</sup>H NMR (500 MHz, CDCl<sub>3</sub>) spectrum of 3al.**

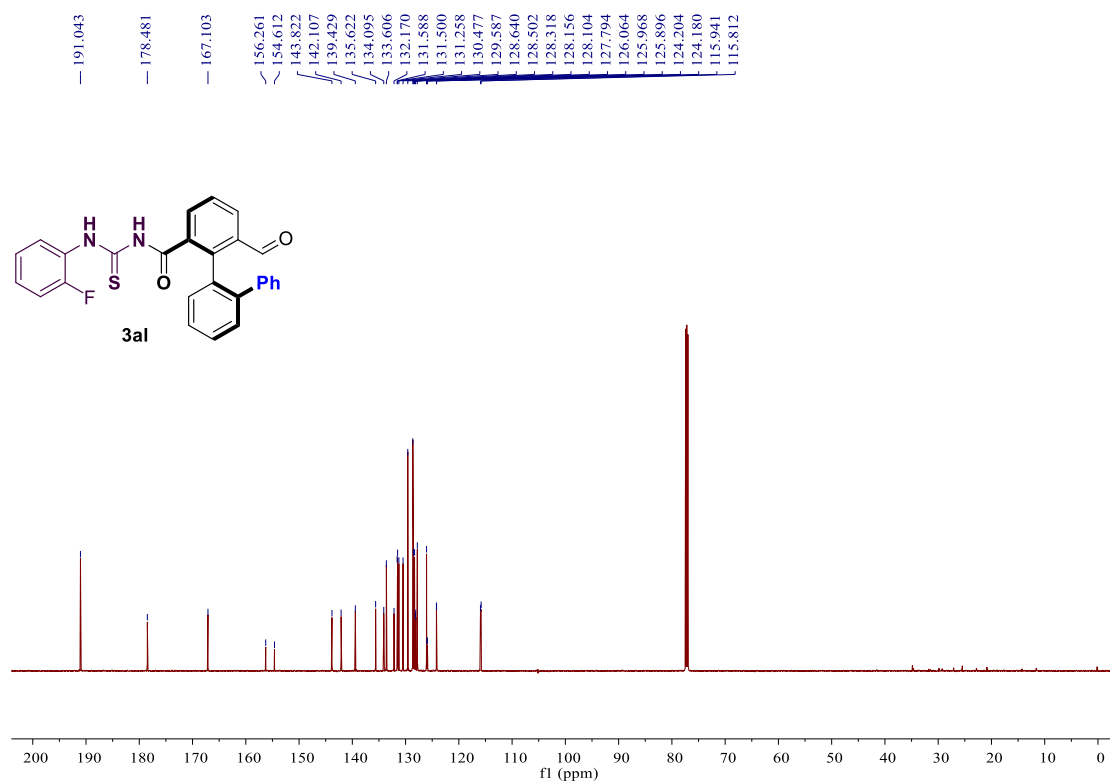

**<sup>13</sup>C NMR (150 MHz, CDCl<sub>3</sub>) spectrum of 3al.**

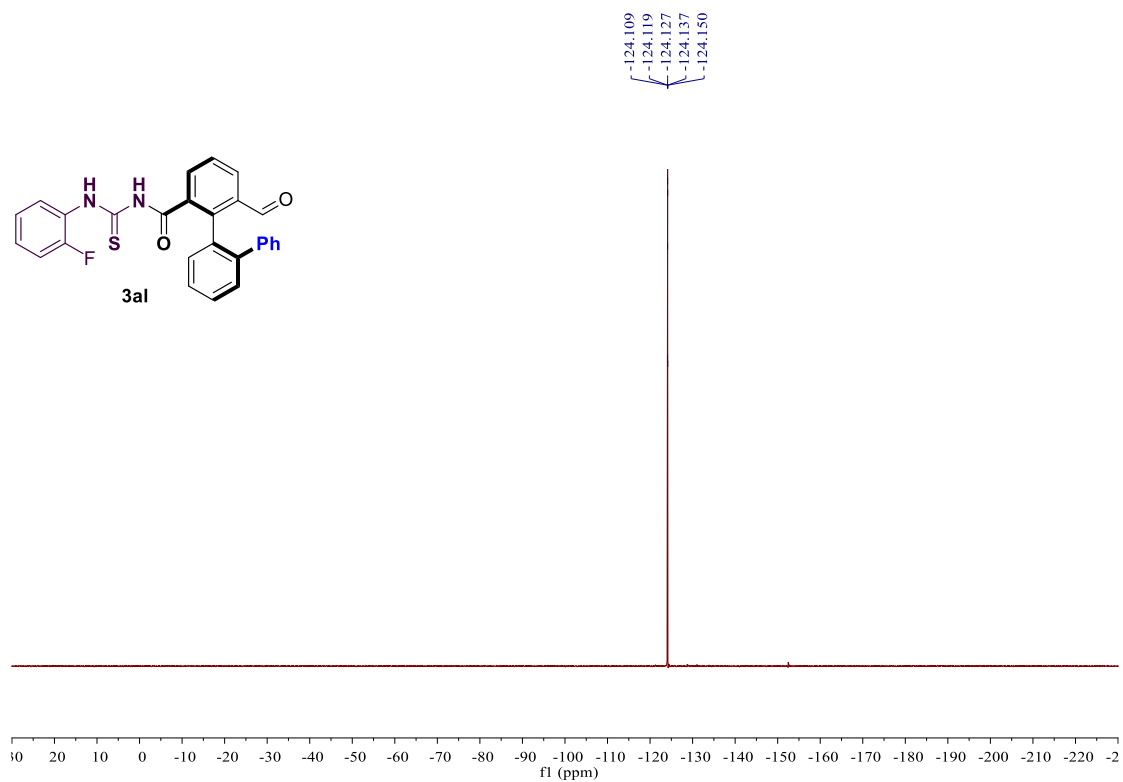

**$^{19}\text{F}$  NMR (565 MHz,  $\text{CDCl}_3$ ) spectrum of 3al.**

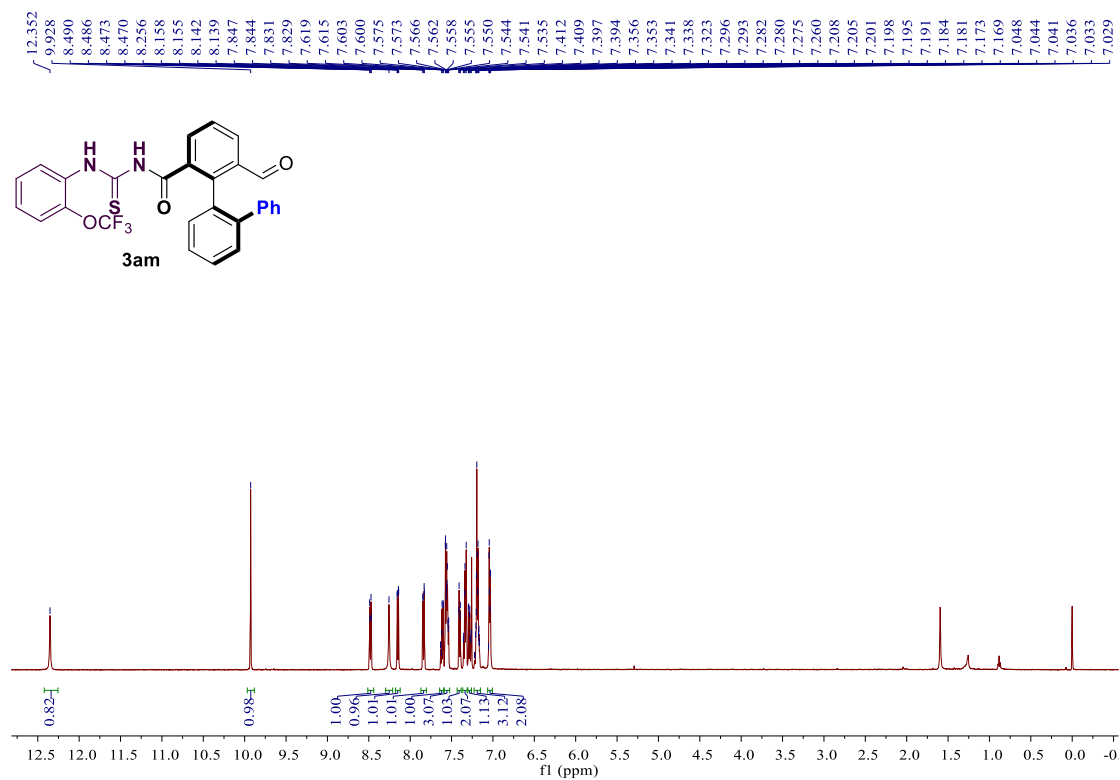

**<sup>1</sup>H NMR (500 MHz, CDCl<sub>3</sub>) spectrum of 3am.**

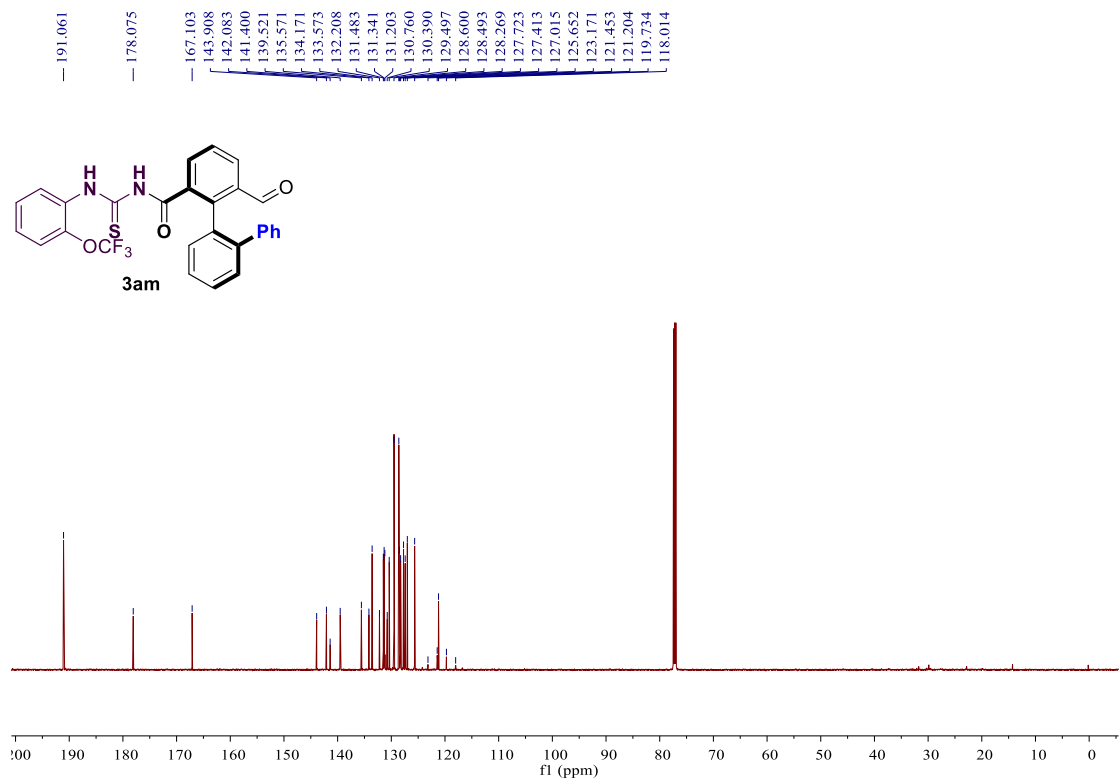

**<sup>13</sup>C NMR (150 MHz, CDCl<sub>3</sub>) spectrum of 3am.**

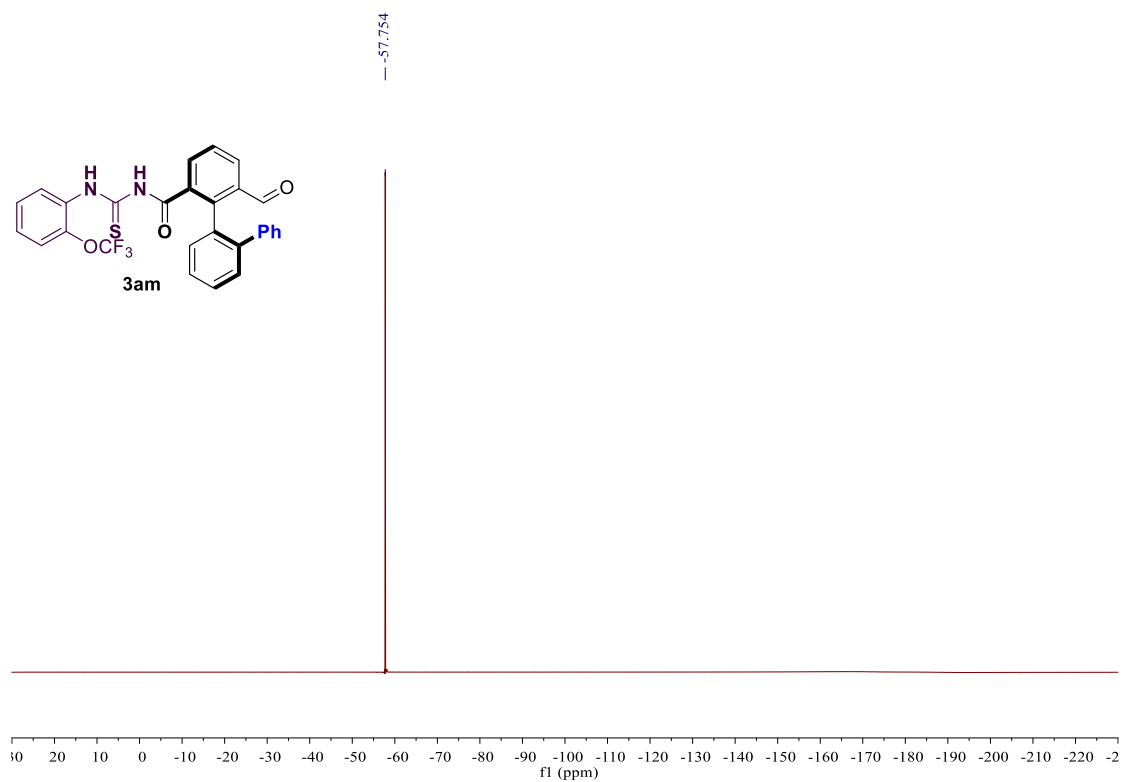

**$^{19}\text{F}$  NMR (565 MHz,  $\text{CDCl}_3$ ) spectrum of 3am.**

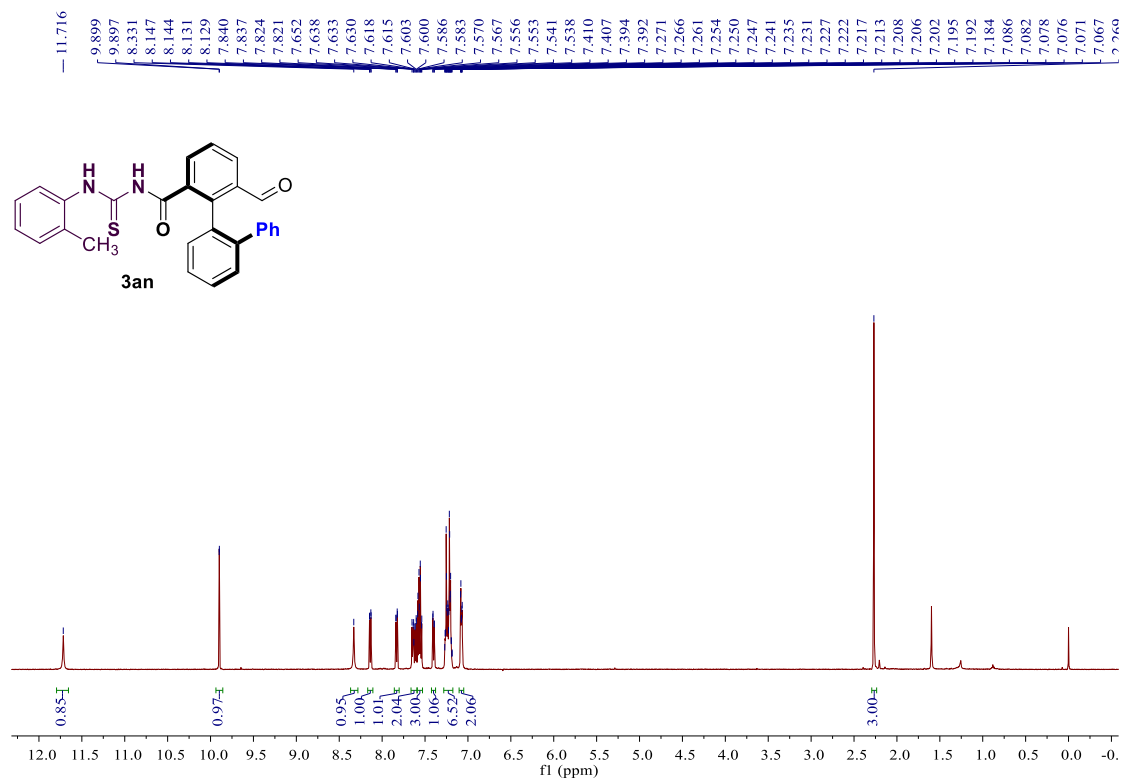

$^1\text{H}$  NMR (500 MHz,  $\text{CDCl}_3$ ) spectrum of **3an**.

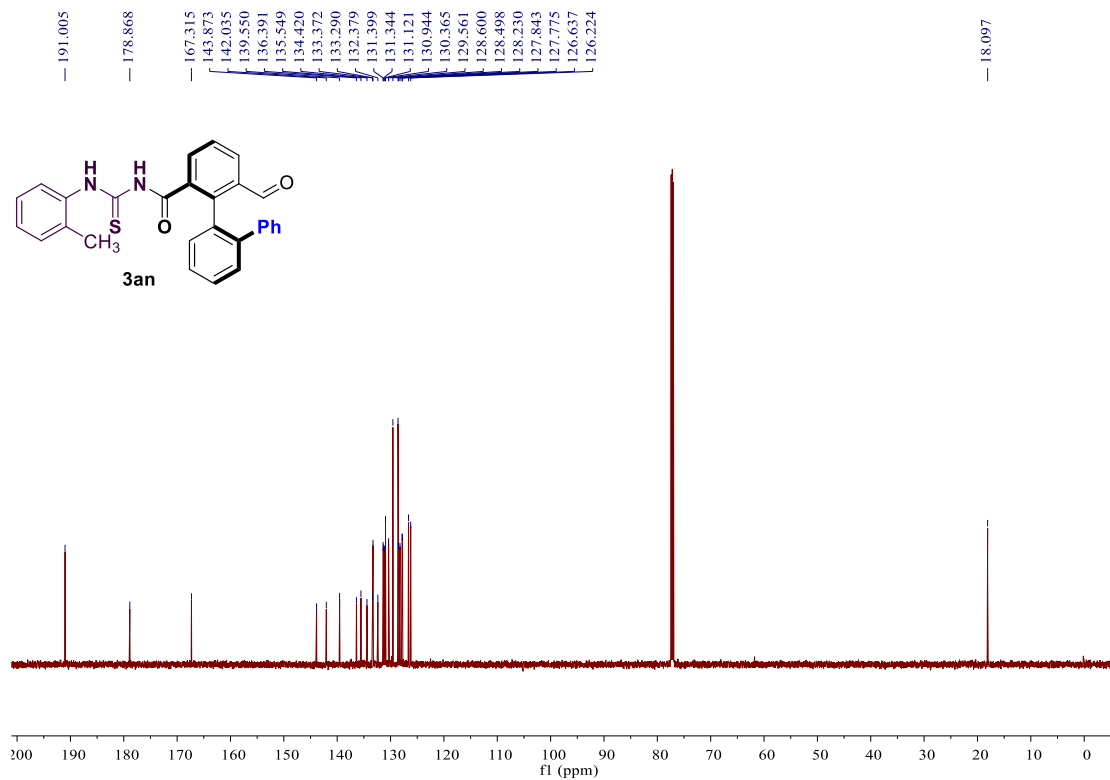

$^{13}\text{C}$  NMR (150 MHz,  $\text{CDCl}_3$ ) spectrum of **3an**.

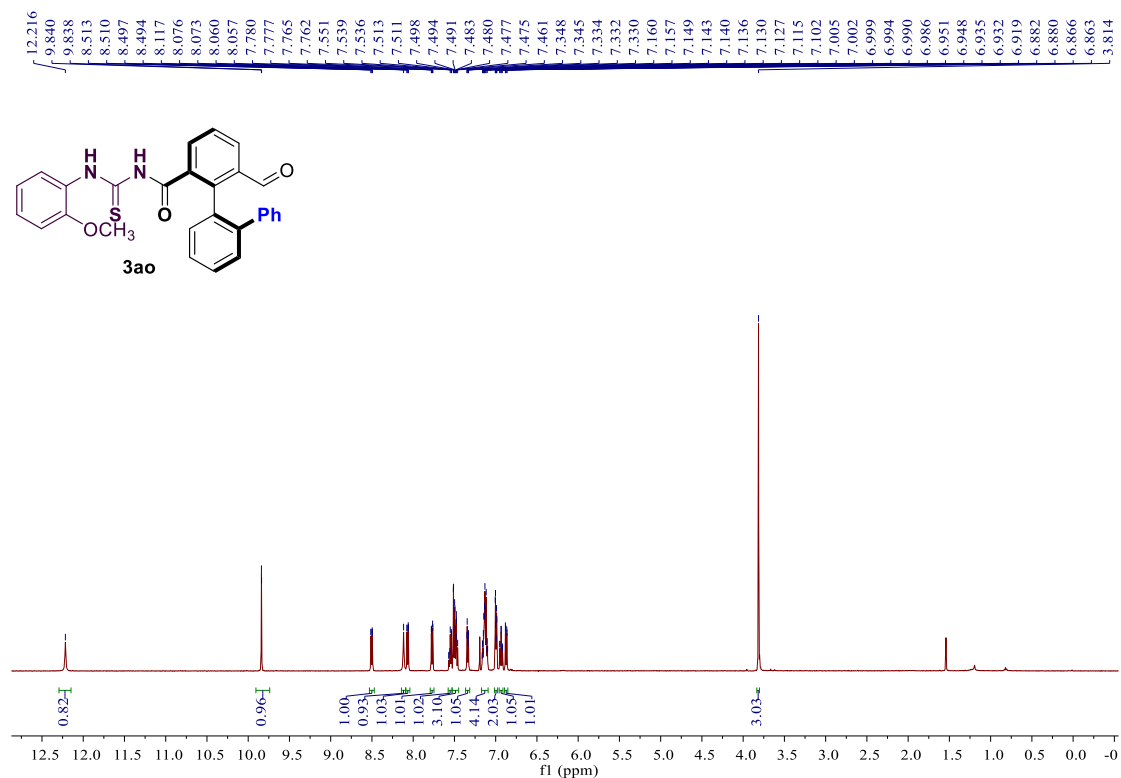

**<sup>1</sup>H NMR (500 MHz, CDCl<sub>3</sub>) spectrum of 3ao.**

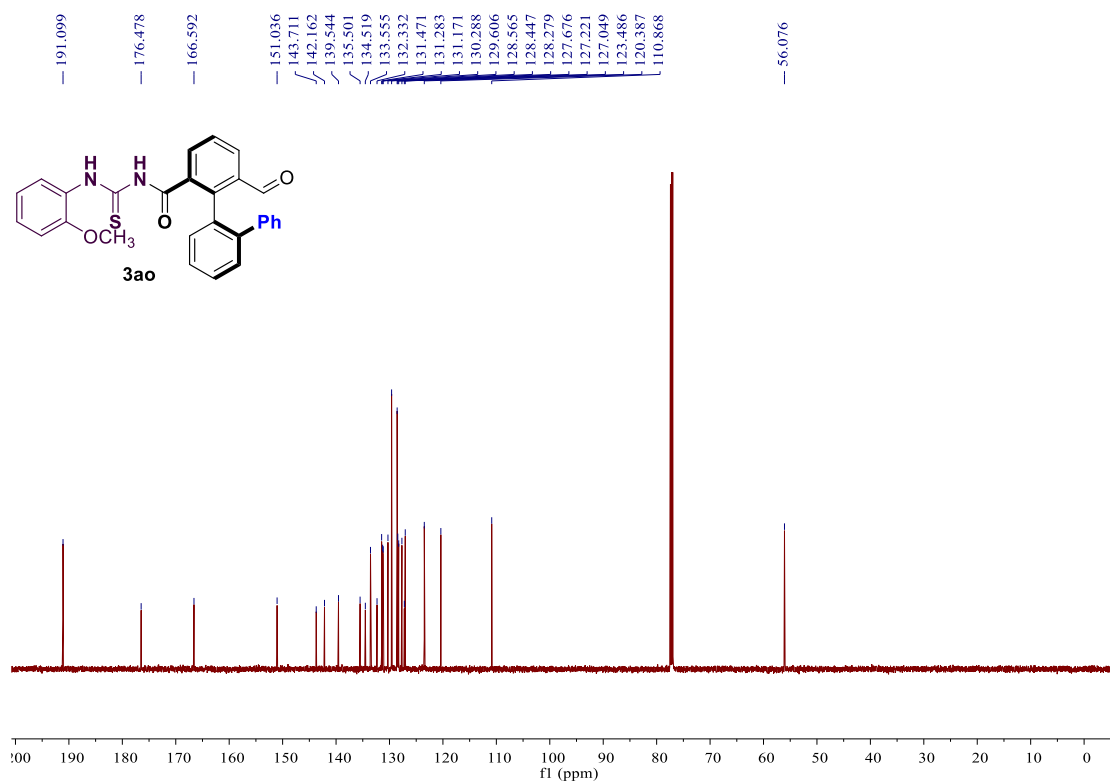

**<sup>13</sup>C NMR (150 MHz, CDCl<sub>3</sub>) spectrum of 3ao.**

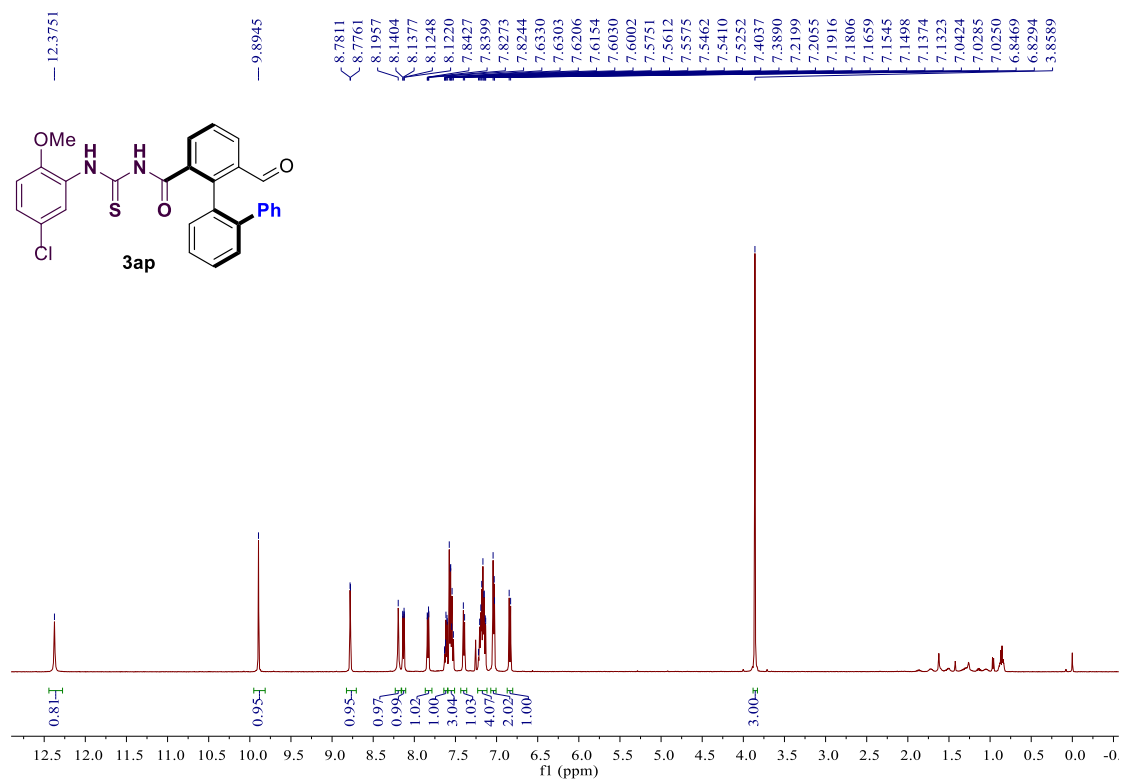

**<sup>1</sup>H NMR (500 MHz, CDCl<sub>3</sub>) spectrum of 3ap.**

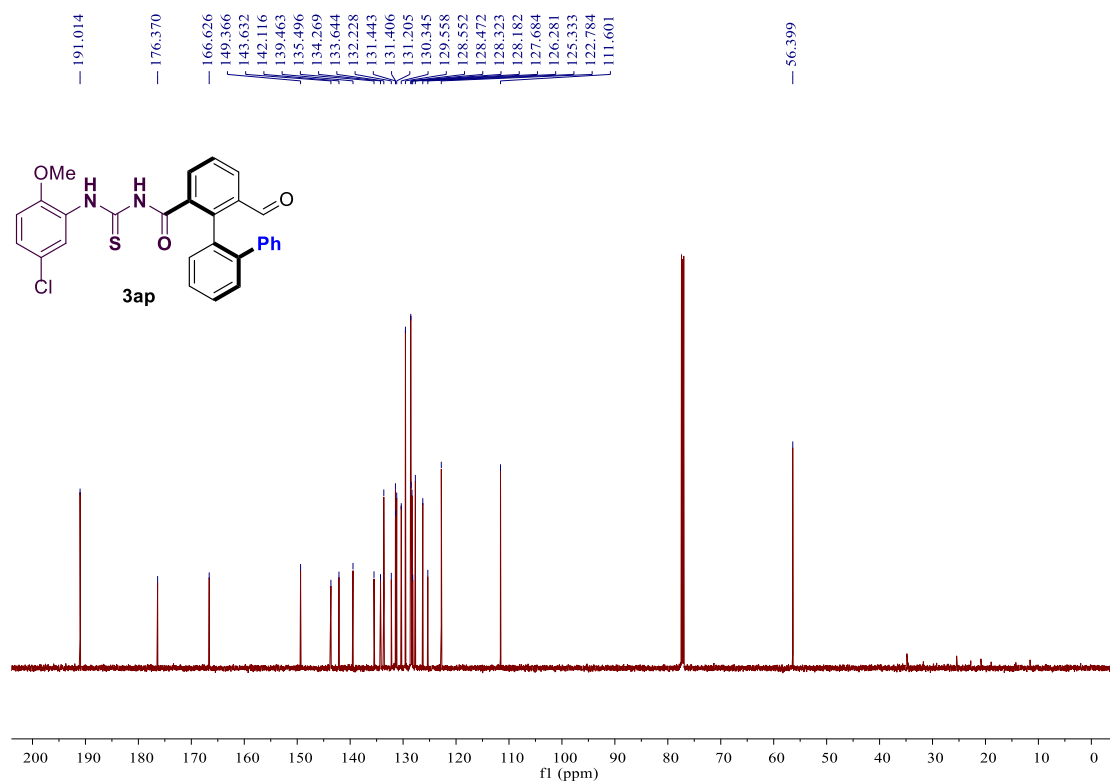

**<sup>13</sup>C NMR (150 MHz, CDCl<sub>3</sub>) spectrum of 3ap.**

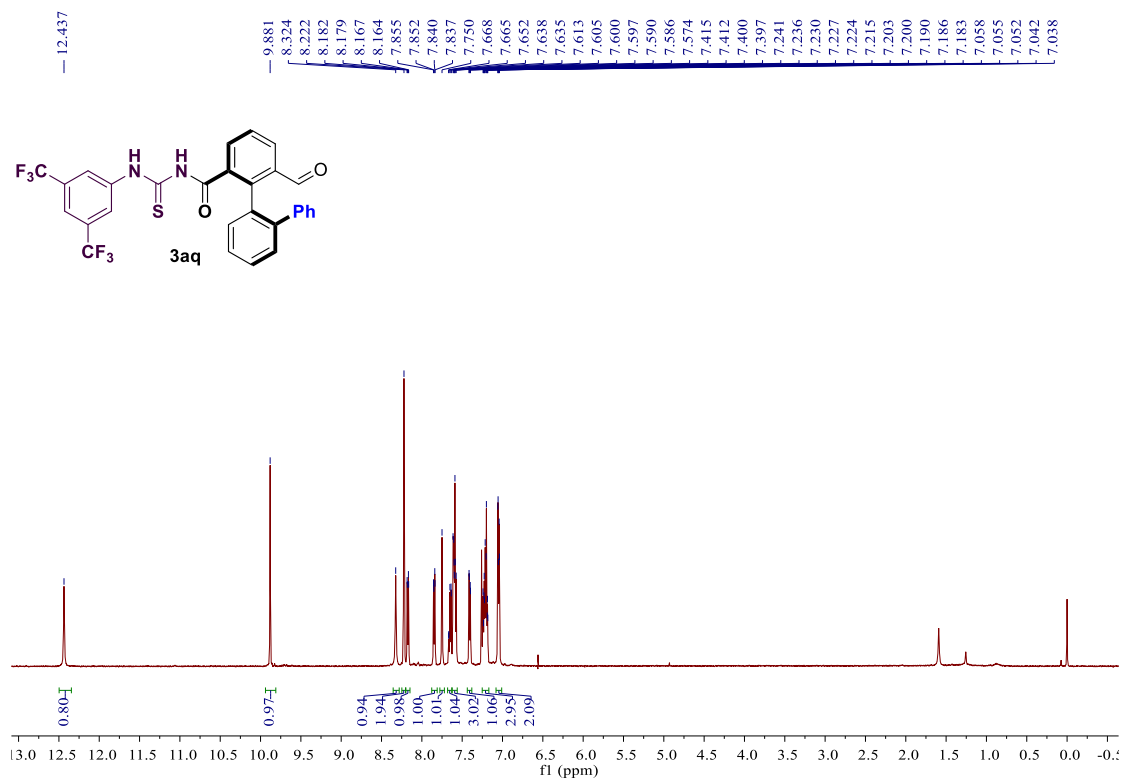

**<sup>1</sup>H NMR (500 MHz, CDCl<sub>3</sub>) spectrum of 3aq.**

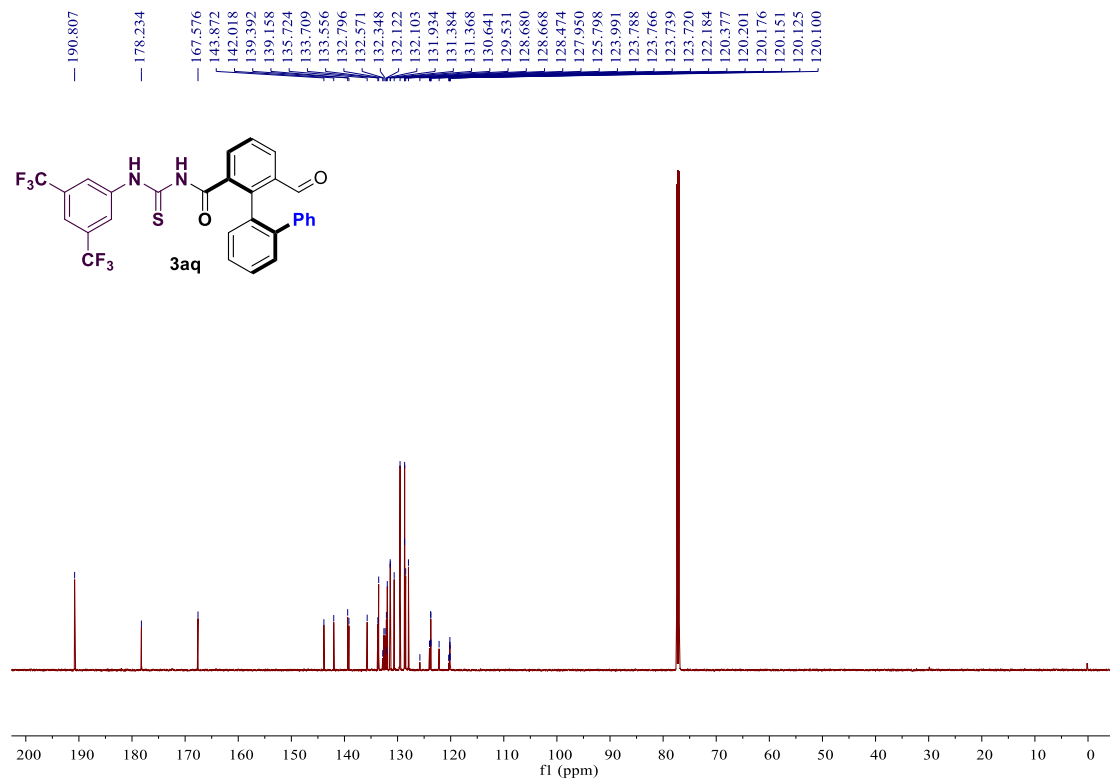

**<sup>13</sup>C NMR (150 MHz, CDCl<sub>3</sub>) spectrum of 3aq.**



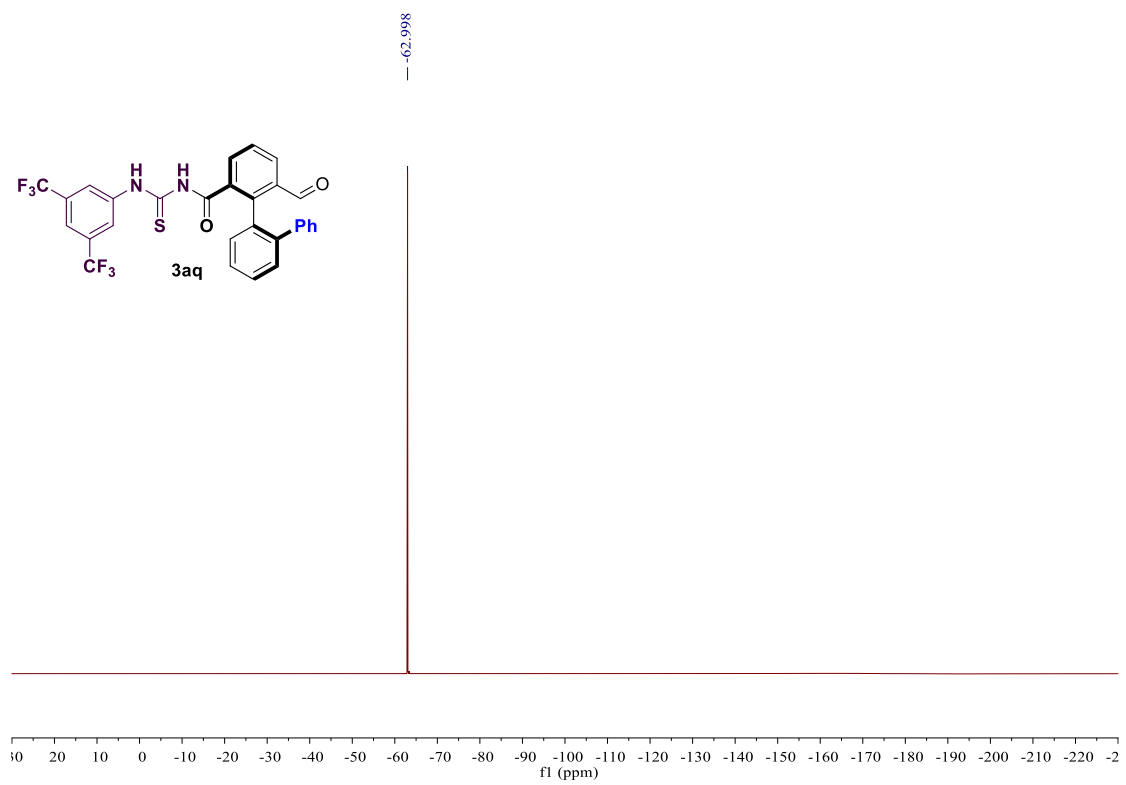

**$^{19}\text{F}$  NMR (565 MHz,  $\text{CDCl}_3$ ) spectrum of 3aq.**

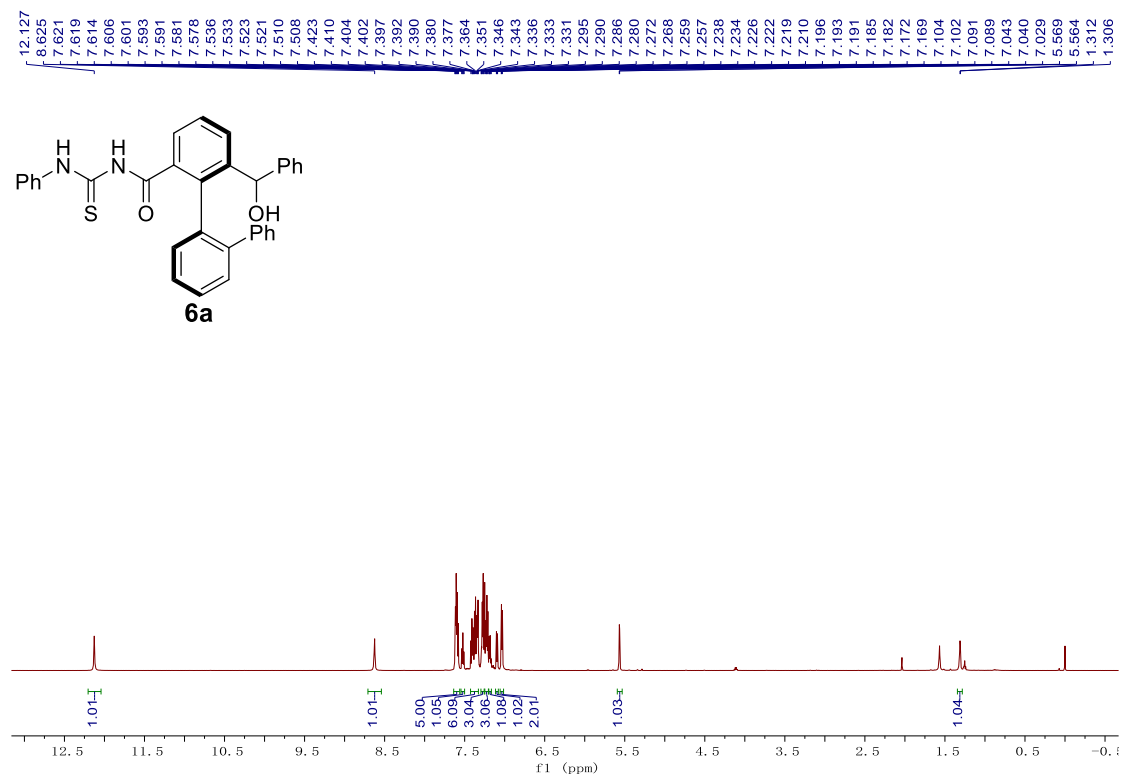

**<sup>1</sup>H NMR (600 MHz, CDCl<sub>3</sub>) spectrum of 6a.**

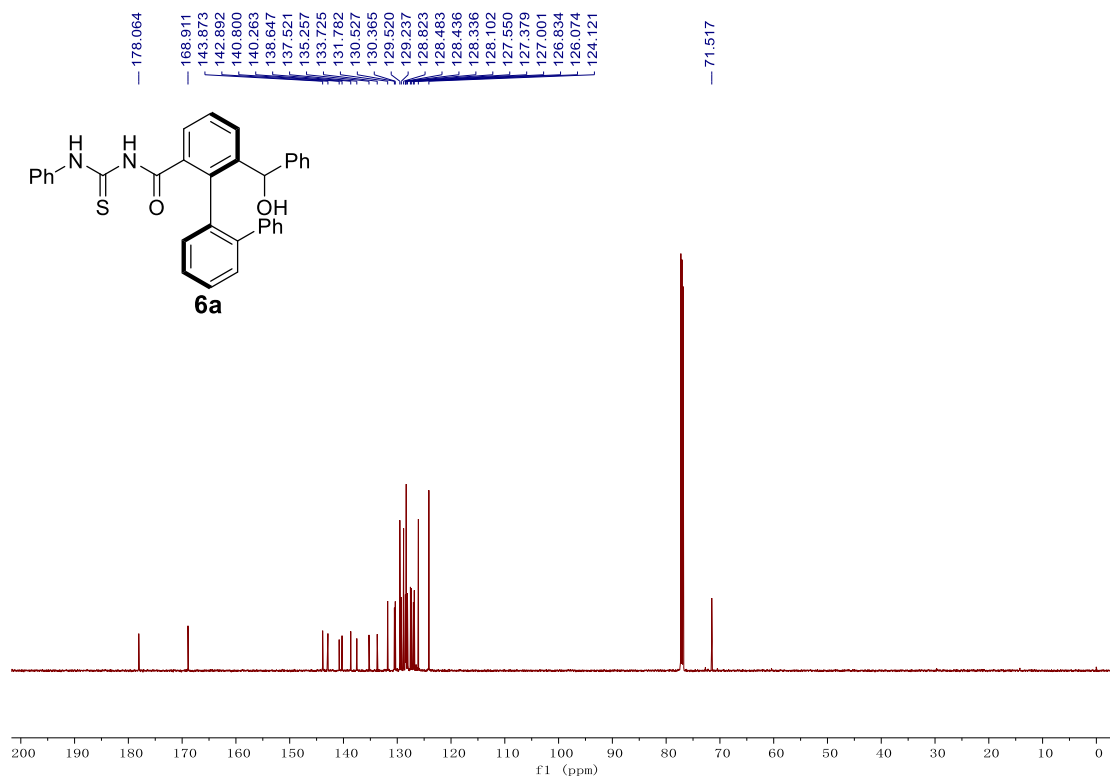

**<sup>13</sup>C NMR (150 MHz, CDCl<sub>3</sub>) spectrum of 6a.**

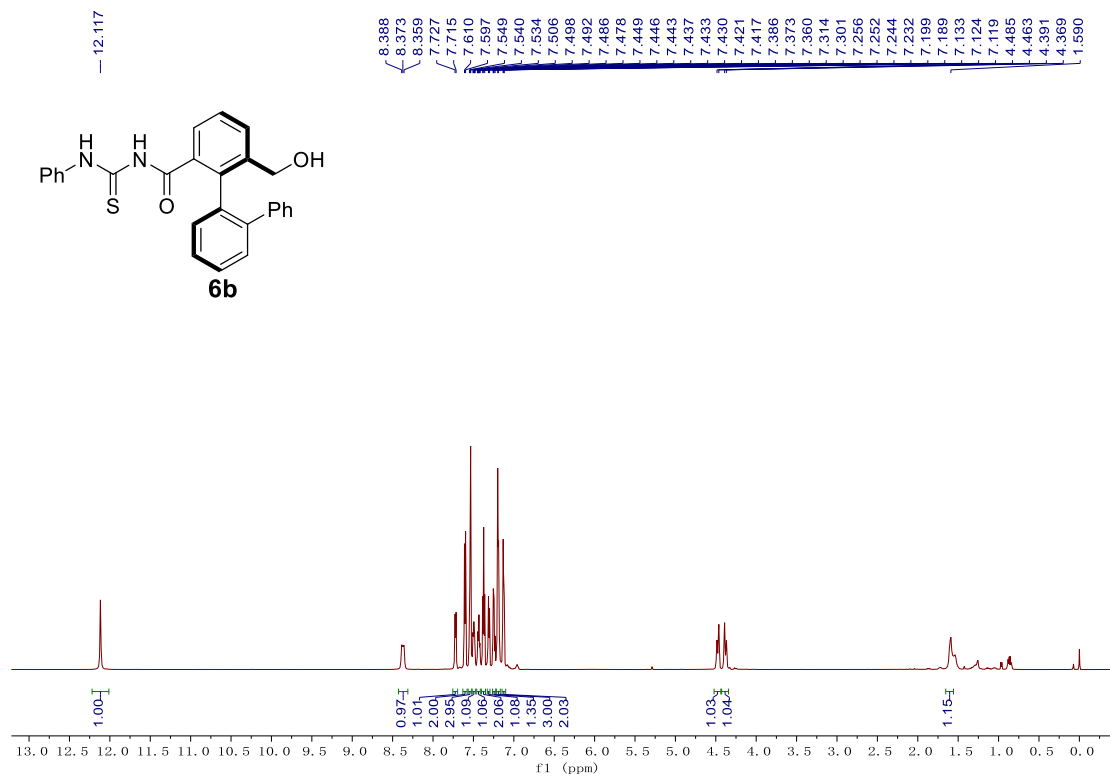

$^1\text{H}$  NMR (600 MHz,  $\text{CDCl}_3$ ) spectrum of **6b**.

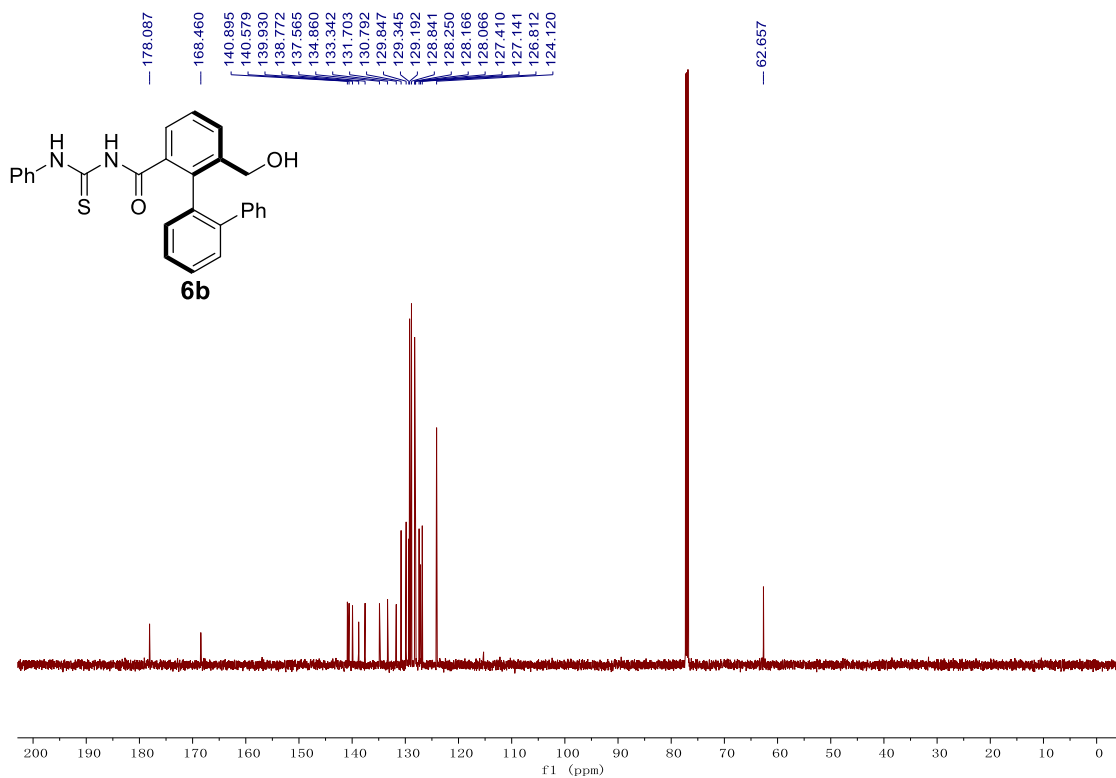

$^{13}\text{C}$  NMR (150 MHz,  $\text{CDCl}_3$ ) spectrum of **6b**.

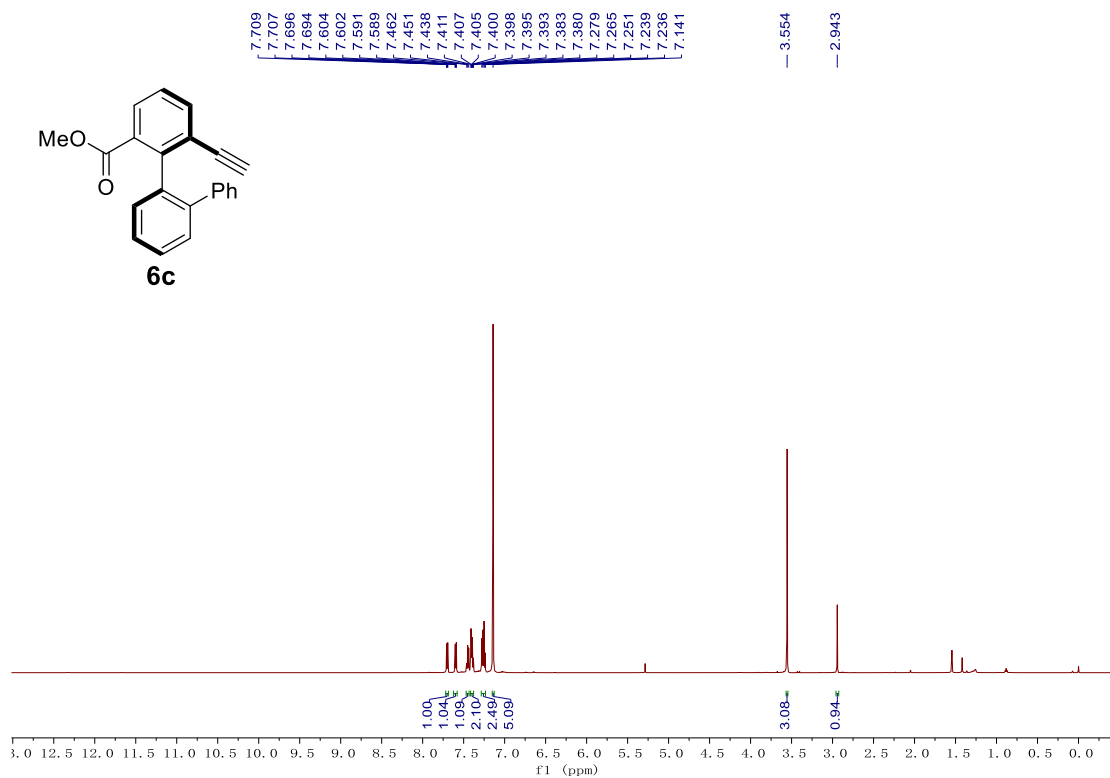

$^1\text{H NMR}$  (600 MHz,  $\text{CDCl}_3$ ) spectrum of **6c**.

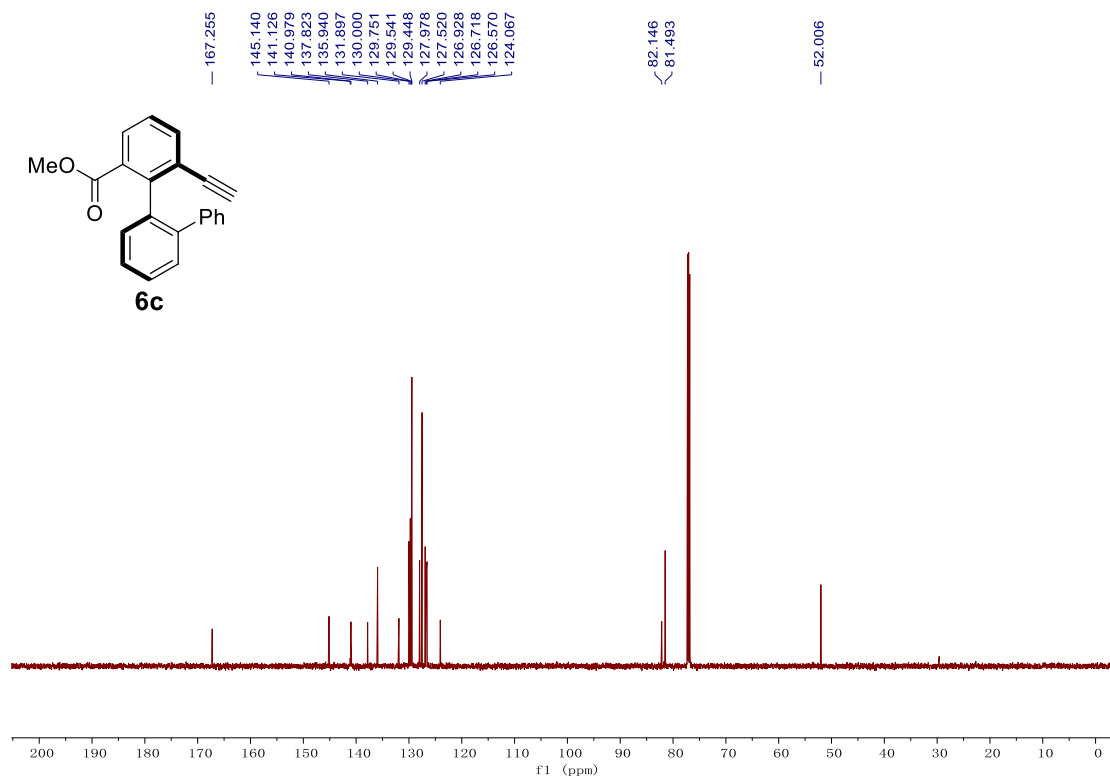

$^{13}\text{C NMR}$  (150 MHz,  $\text{CDCl}_3$ ) spectrum of **6c**.

12.114  
8.079  
7.826  
7.813  
7.624  
7.611  
7.553  
7.539  
7.531  
7.526  
7.517  
7.514  
7.506  
7.502  
7.461  
7.448  
7.395  
7.382  
7.369  
7.340  
7.334  
7.331  
7.323  
7.319  
7.306  
7.280  
7.248  
7.235  
7.213  
7.210  
7.200  
7.189  
7.177  
7.167  
7.162  
7.047  
7.037  
7.033  
6.634  
6.616  
6.605  
6.587  
5.724  
5.695  
5.270  
5.252

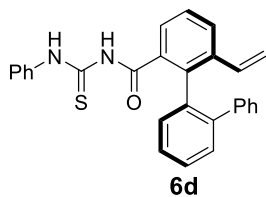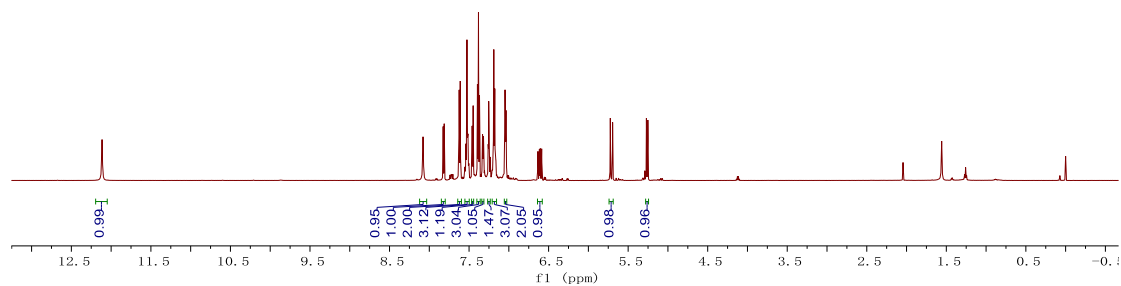

**<sup>1</sup>H NMR (600 MHz, CDCl<sub>3</sub>) spectrum of 6d.**

177.985  
168.257  
141.322  
139.976  
138.732  
138.538  
137.643  
135.087  
134.744  
133.553  
131.072  
130.746  
129.373  
129.257  
128.834  
128.111  
127.877  
127.487  
127.246  
126.734  
124.051  
116.711

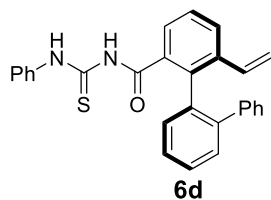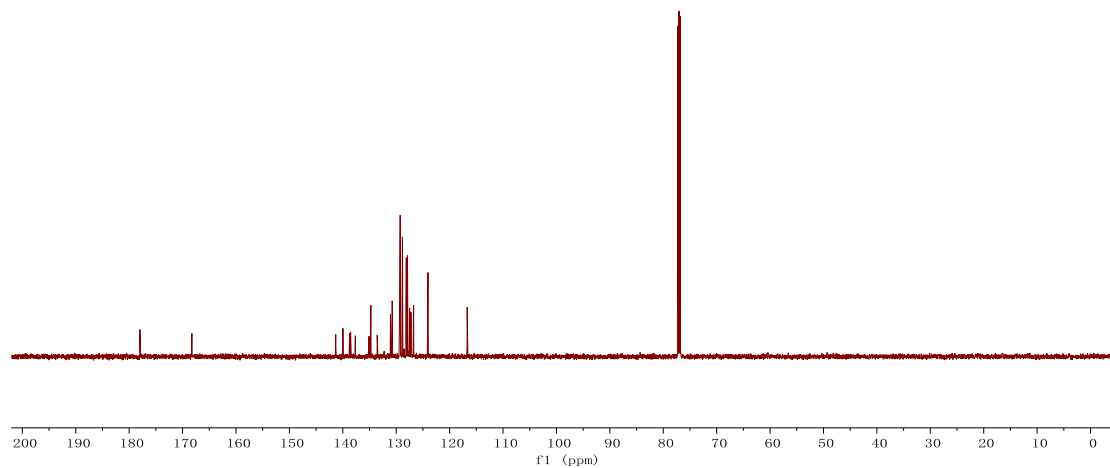

**<sup>13</sup>C NMR (150 MHz, CDCl<sub>3</sub>) spectrum of 6d.**

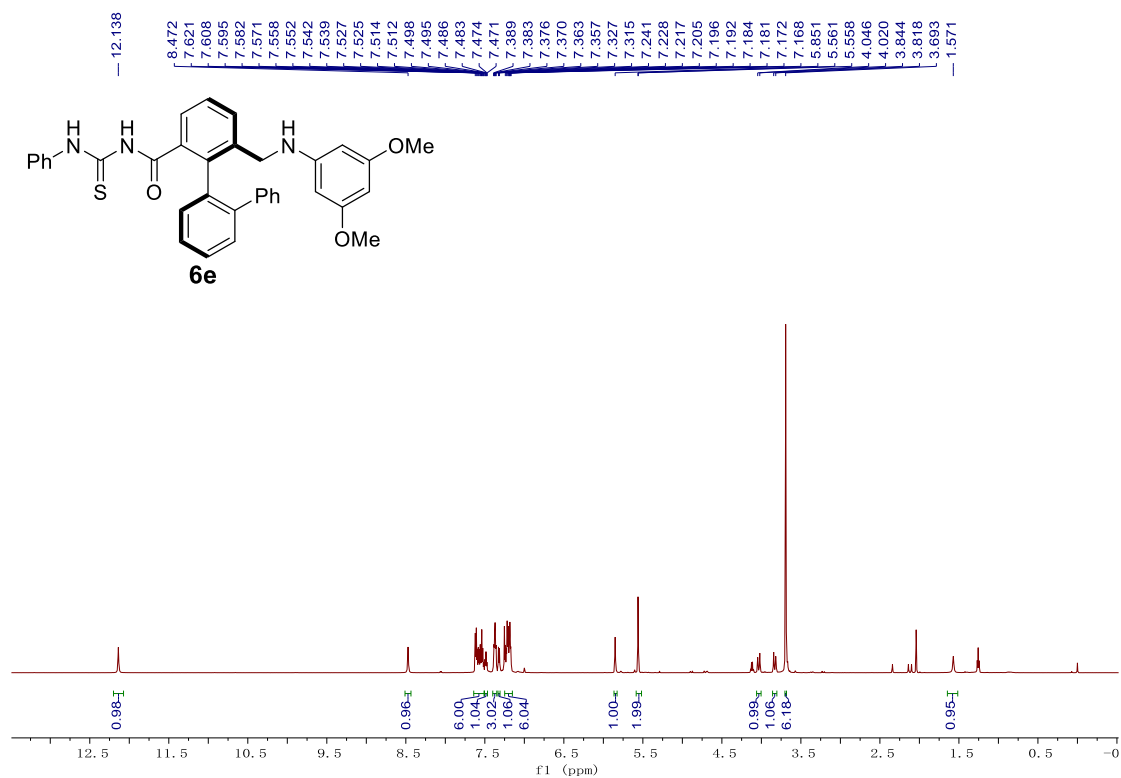

**<sup>1</sup>H NMR (600 MHz, CDCl<sub>3</sub>) spectrum of 6e.**

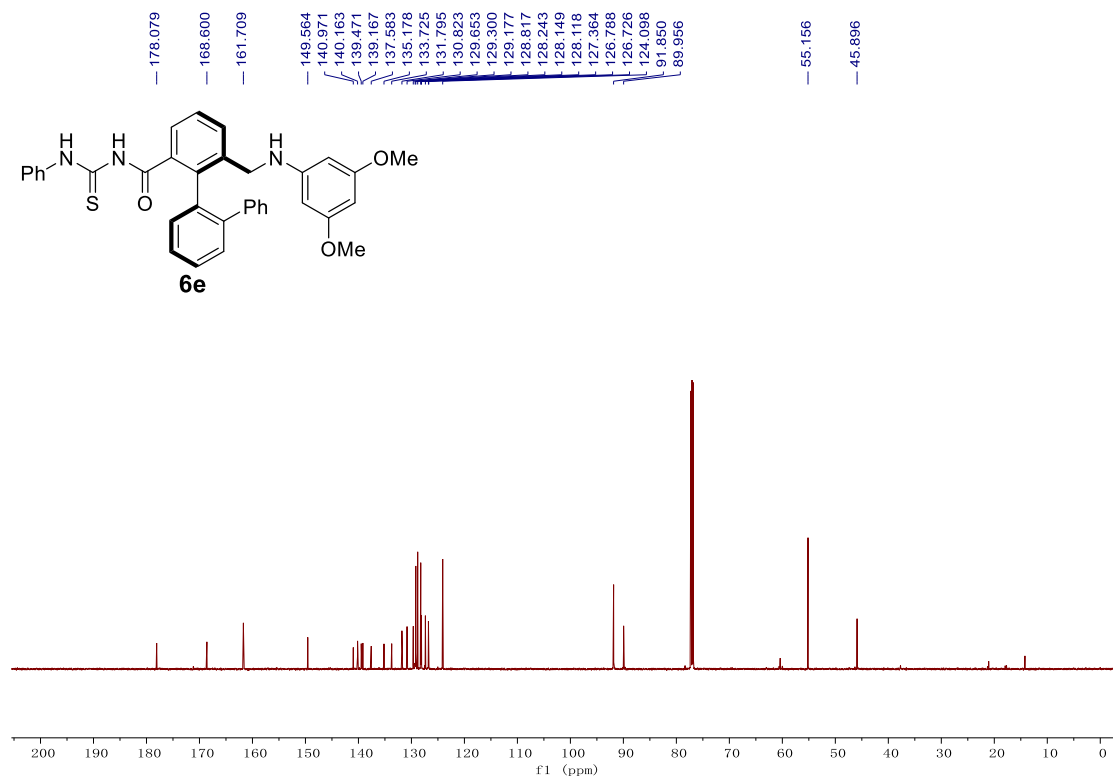

**<sup>13</sup>C NMR (150 MHz, CDCl<sub>3</sub>) spectrum of 6e.**

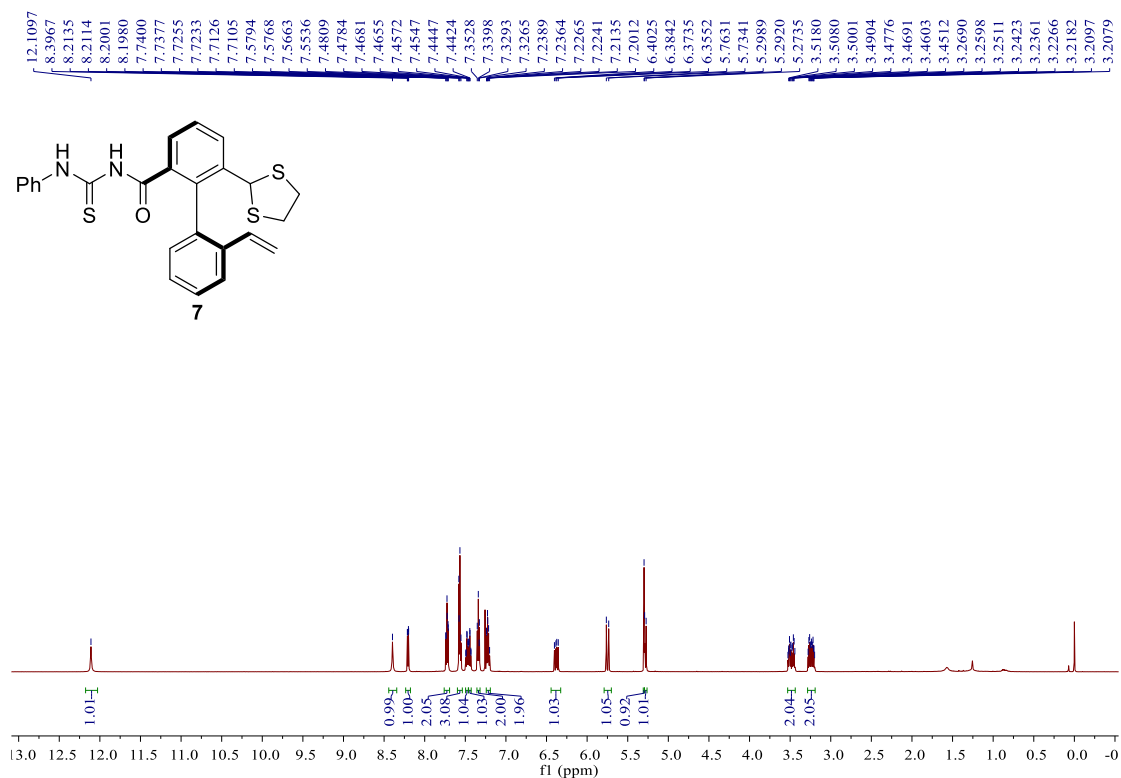

**<sup>1</sup>H NMR (600 MHz, CDCl<sub>3</sub>) spectrum of 7.**

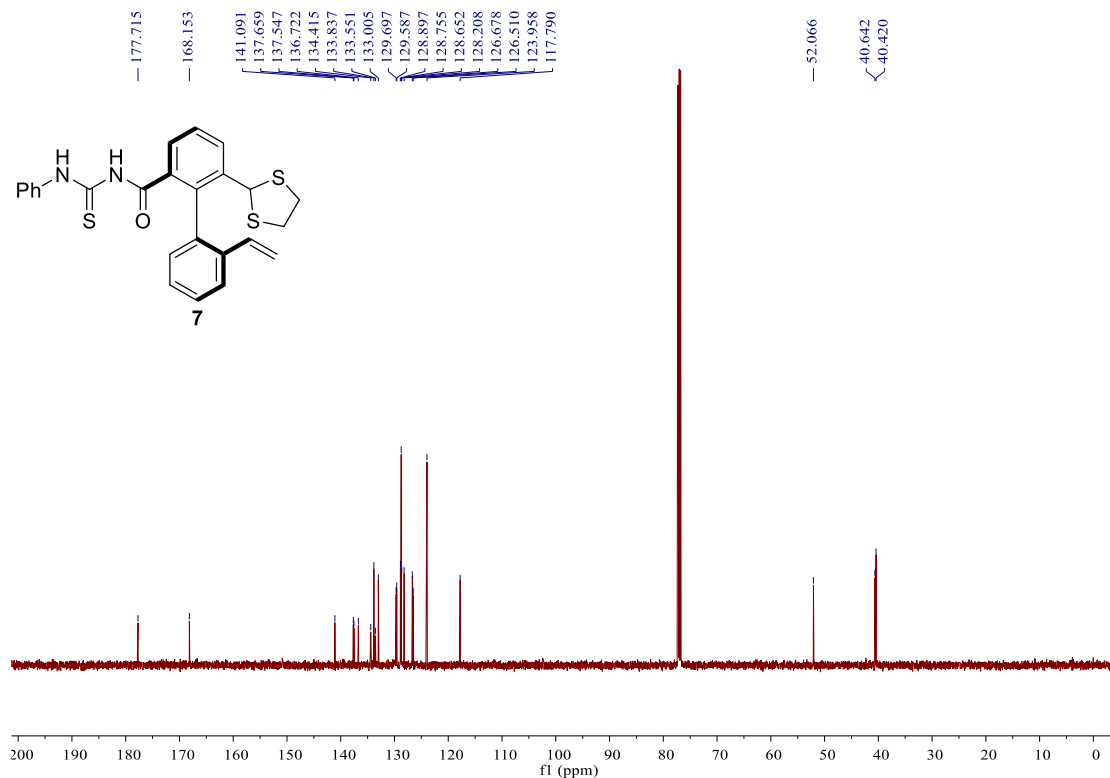

**<sup>13</sup>C NMR (125 MHz, CDCl<sub>3</sub>) spectrum of 7.**

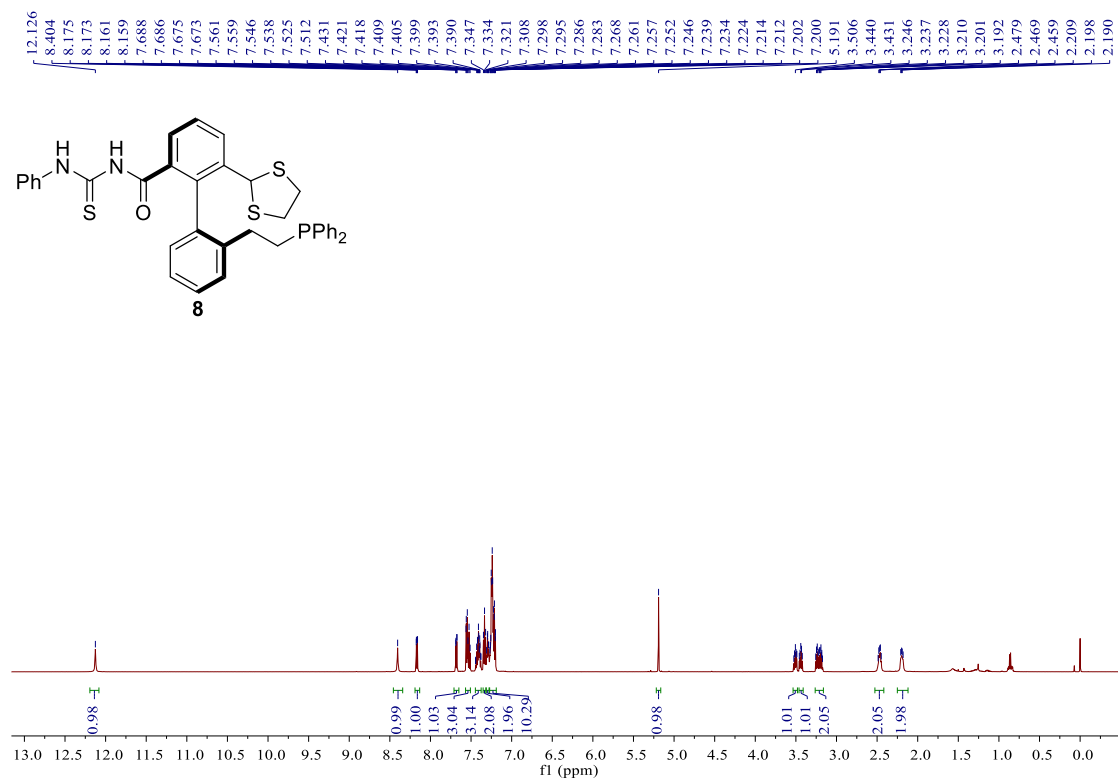

**<sup>1</sup>H NMR (600 MHz, CDCl<sub>3</sub>) spectrum of 8.**

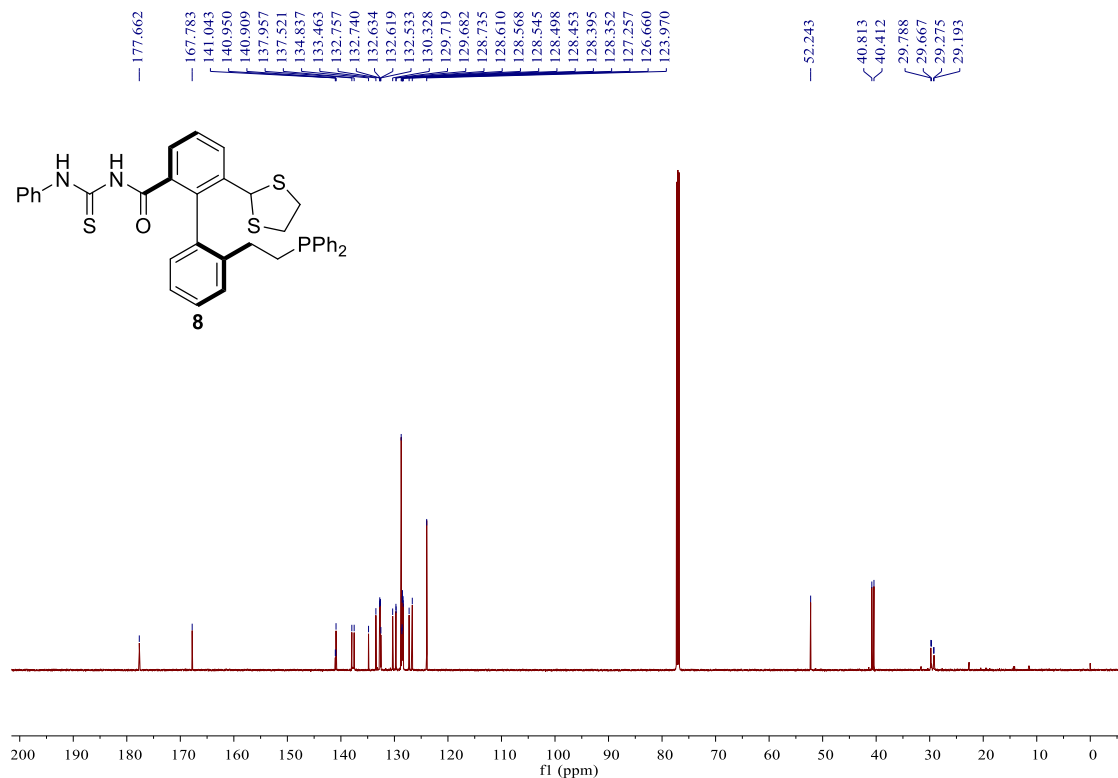

**<sup>13</sup>C NMR (150 MHz, CDCl<sub>3</sub>) spectrum of 8.**



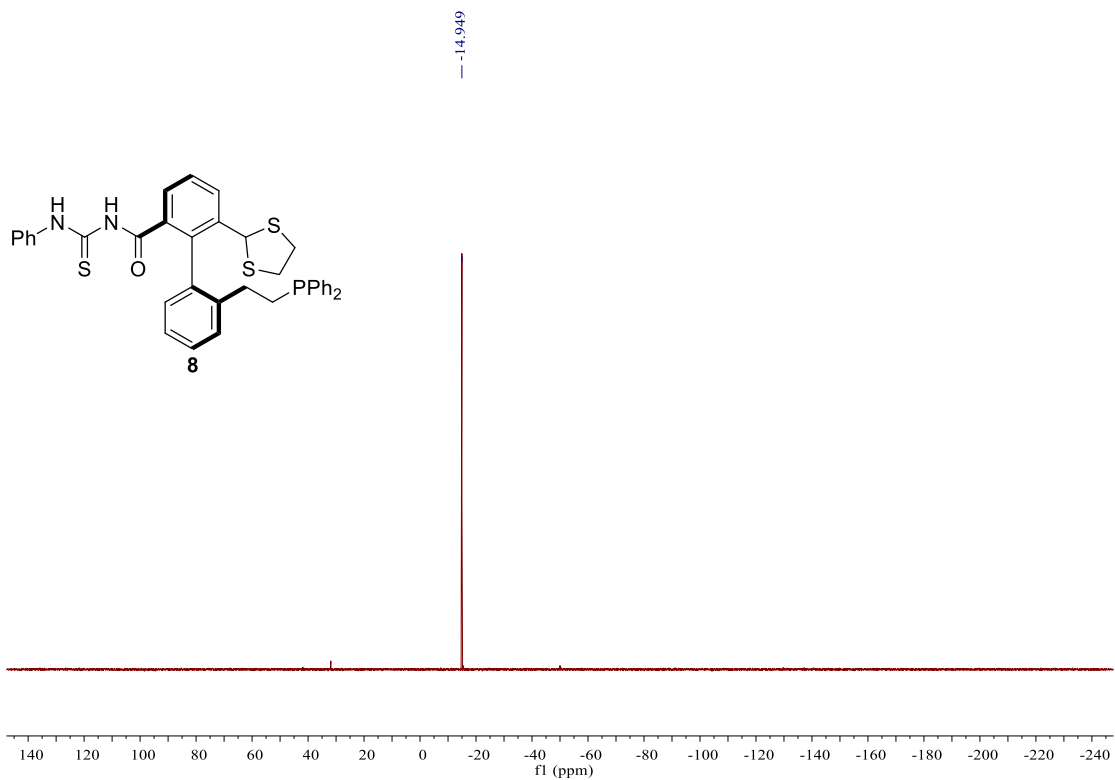

**<sup>31</sup>P NMR (243 MHz, CDCl<sub>3</sub>) spectrum of 8.**

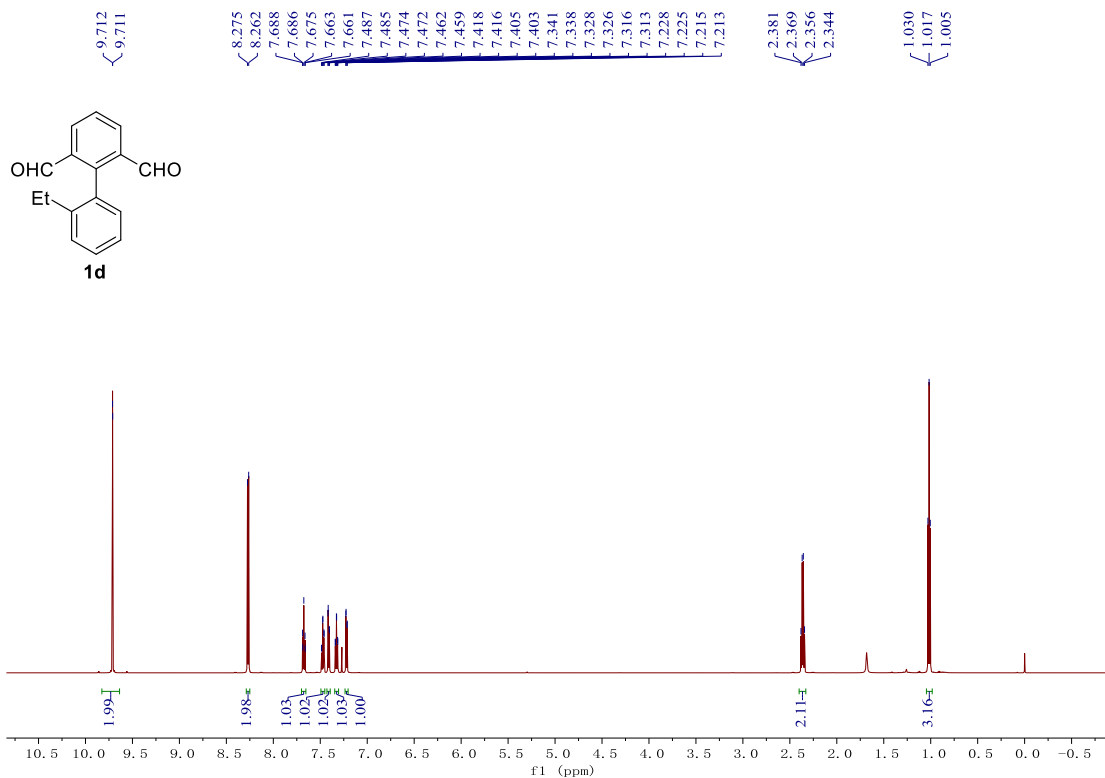

**<sup>1</sup>H NMR (600 MHz, CDCl<sub>3</sub>) spectrum of 1d.**

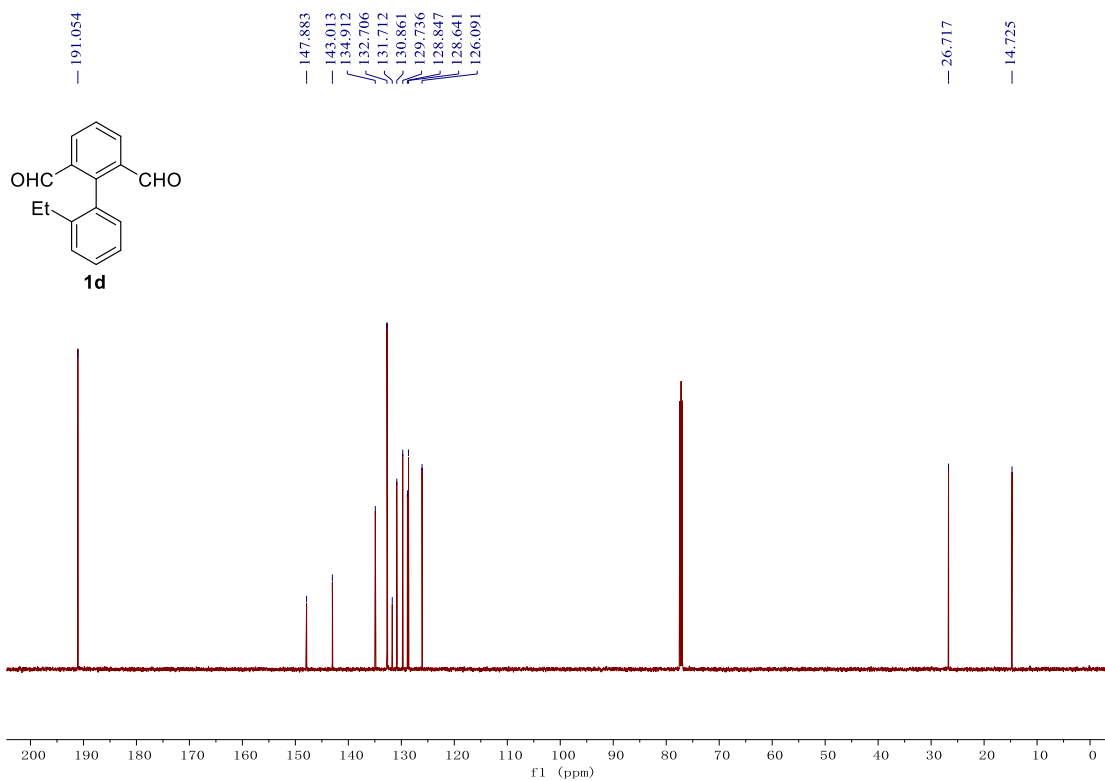

**<sup>13</sup>C NMR (150 MHz, CDCl<sub>3</sub>) spectrum of 1d.**

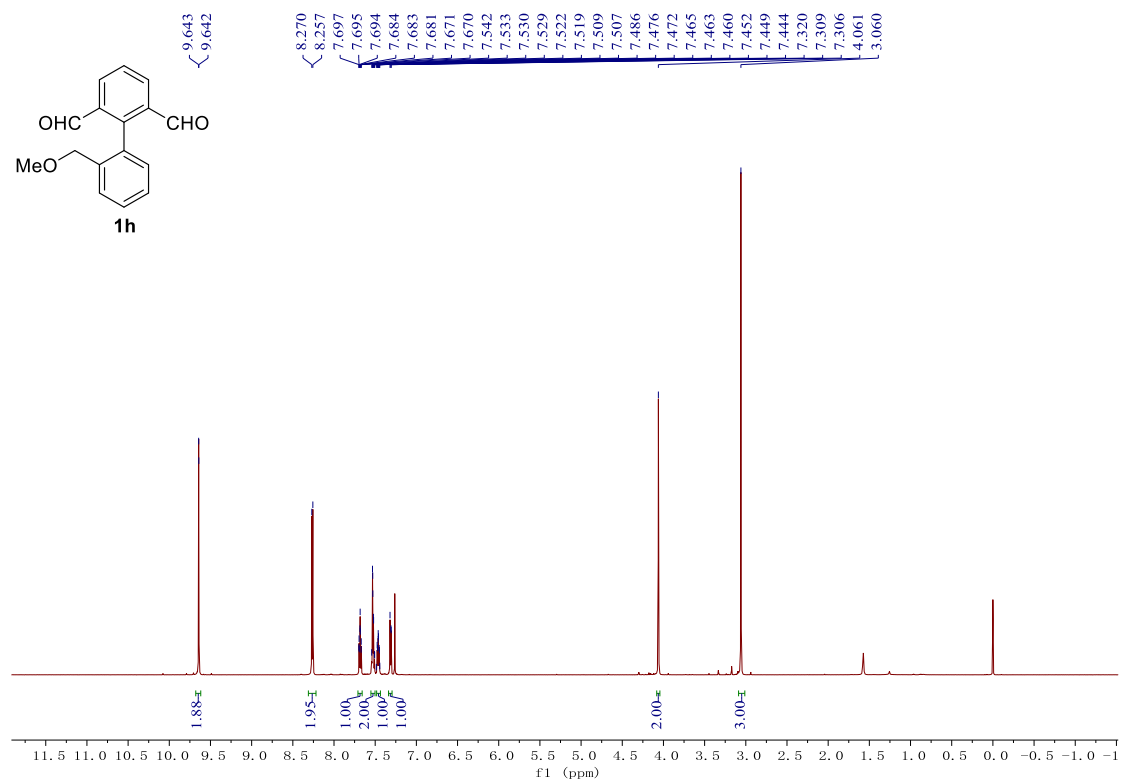

**<sup>1</sup>H NMR (600 MHz, CDCl<sub>3</sub>) spectrum of 1h.**

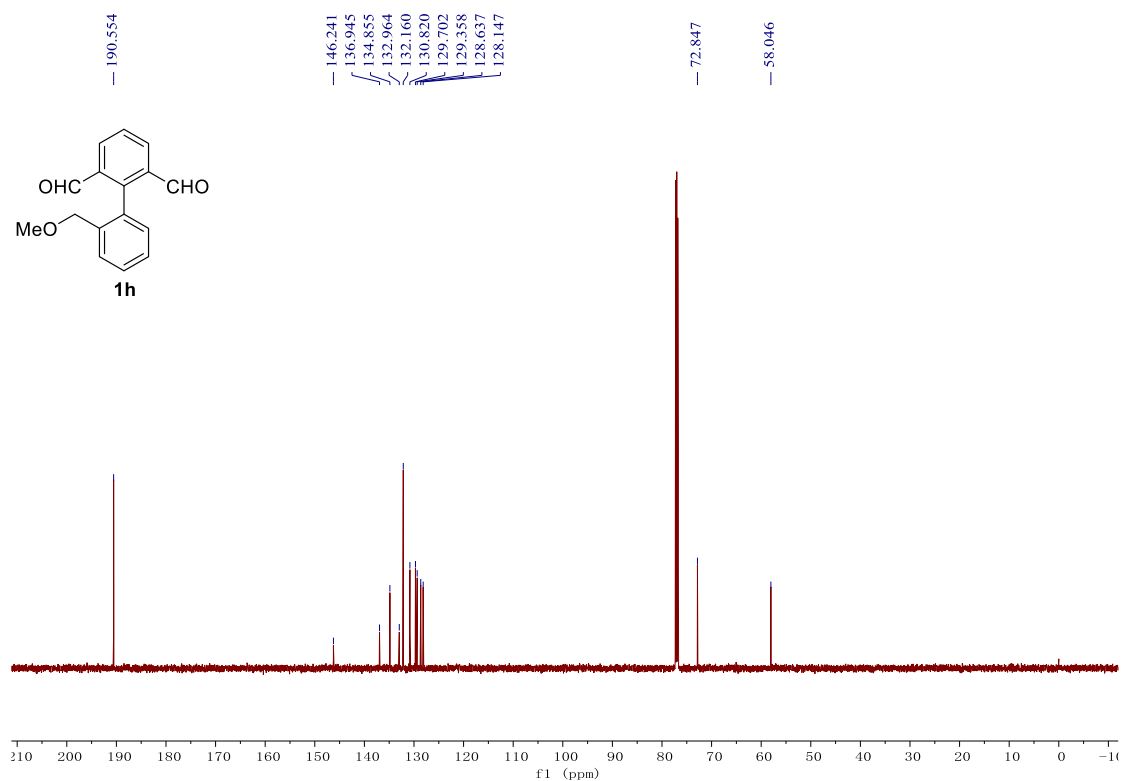

**<sup>13</sup>C NMR (150 MHz, CDCl<sub>3</sub>) spectrum of 1h.**

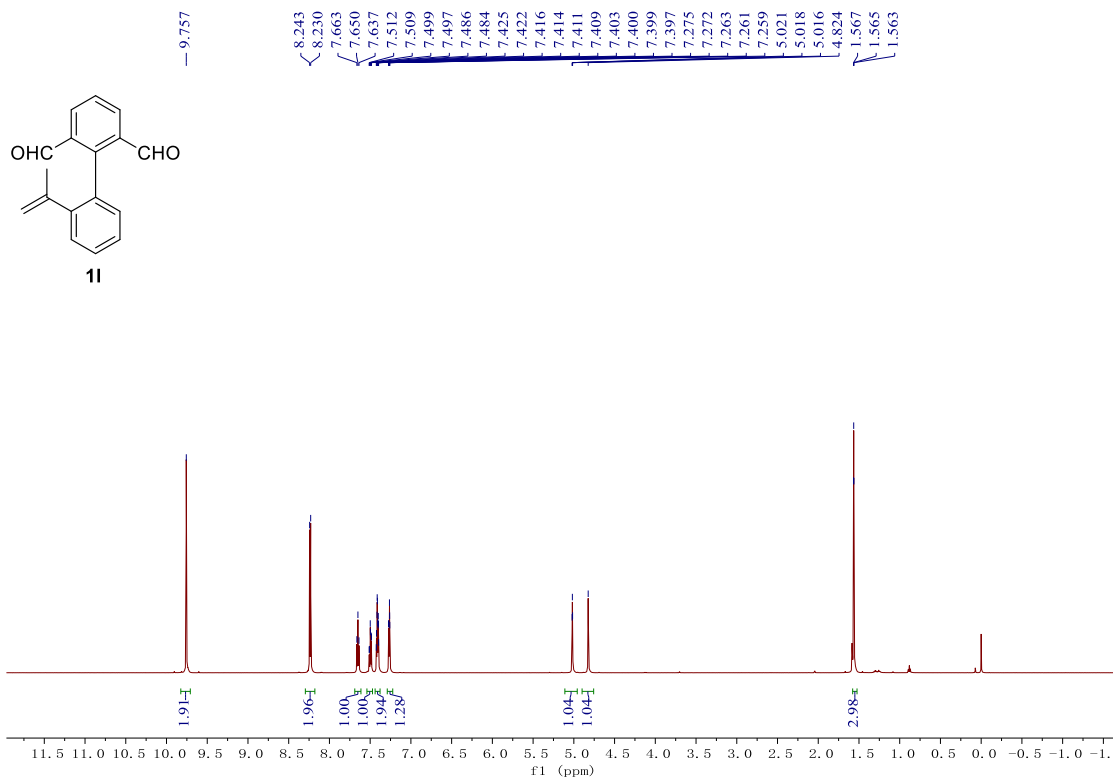

**<sup>1</sup>H NMR (600 MHz, CDCl<sub>3</sub>) spectrum of 11.**

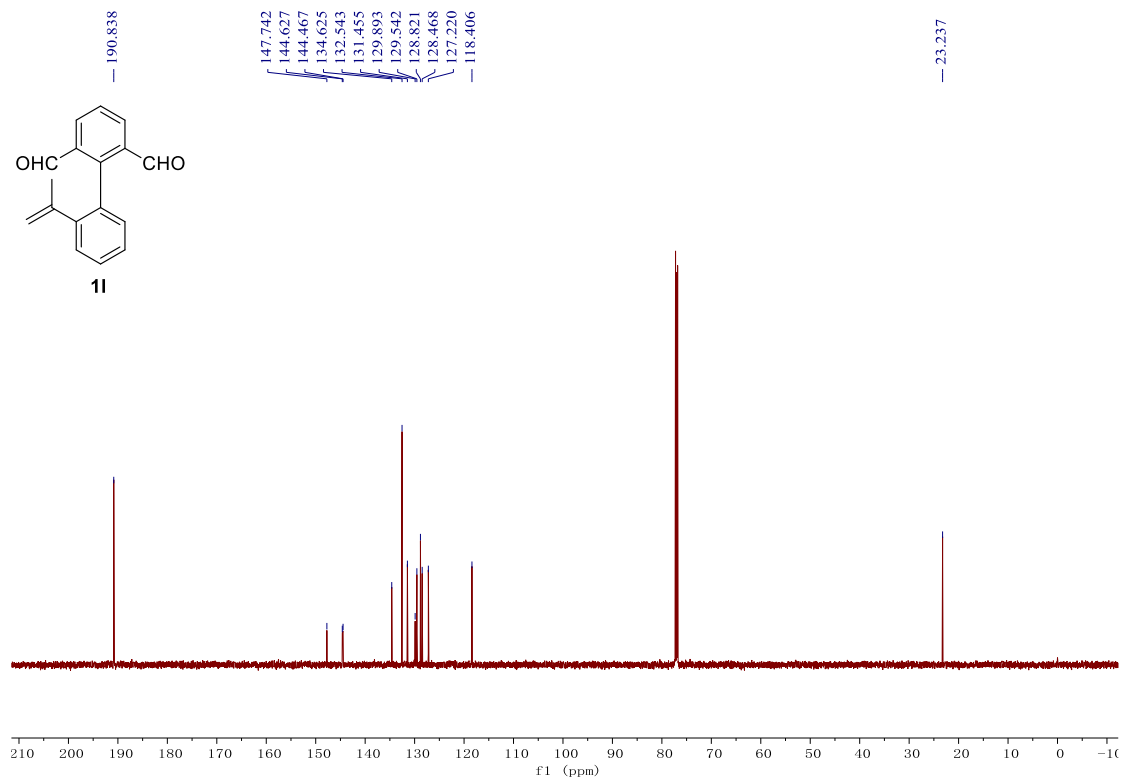

**<sup>13</sup>C NMR (150 MHz, CDCl<sub>3</sub>) spectrum of 11.**

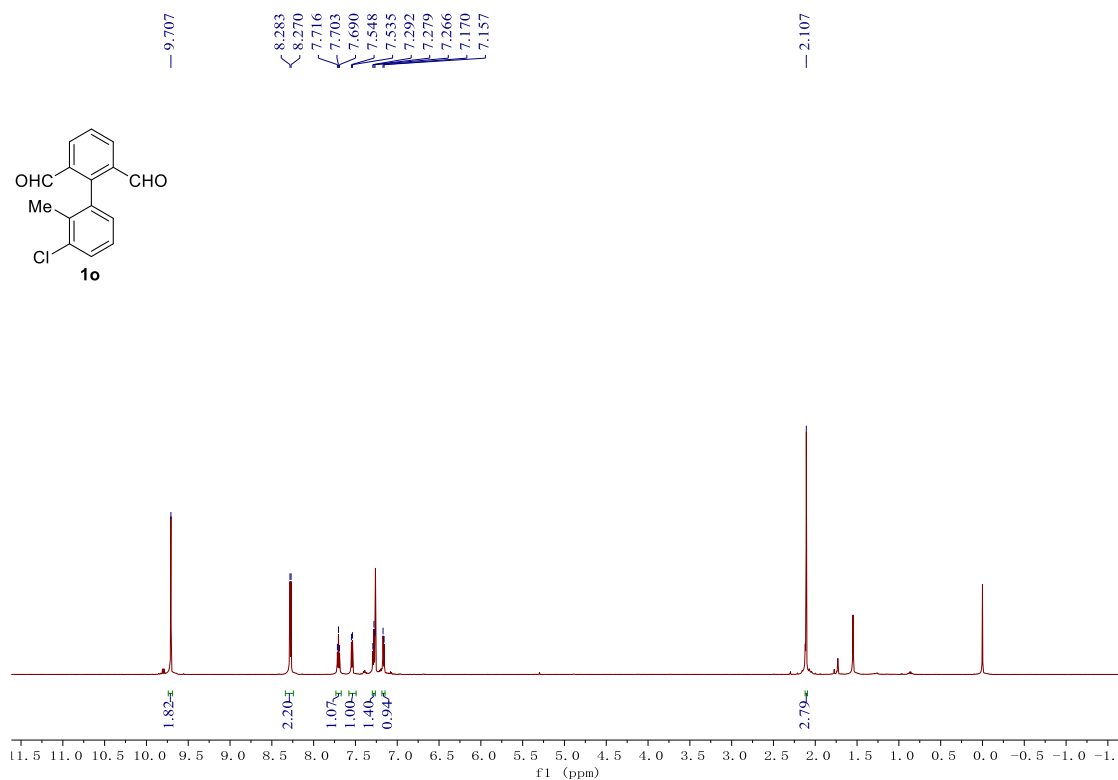

**<sup>1</sup>H NMR (600 MHz, CDCl<sub>3</sub>) spectrum of **1o**.**

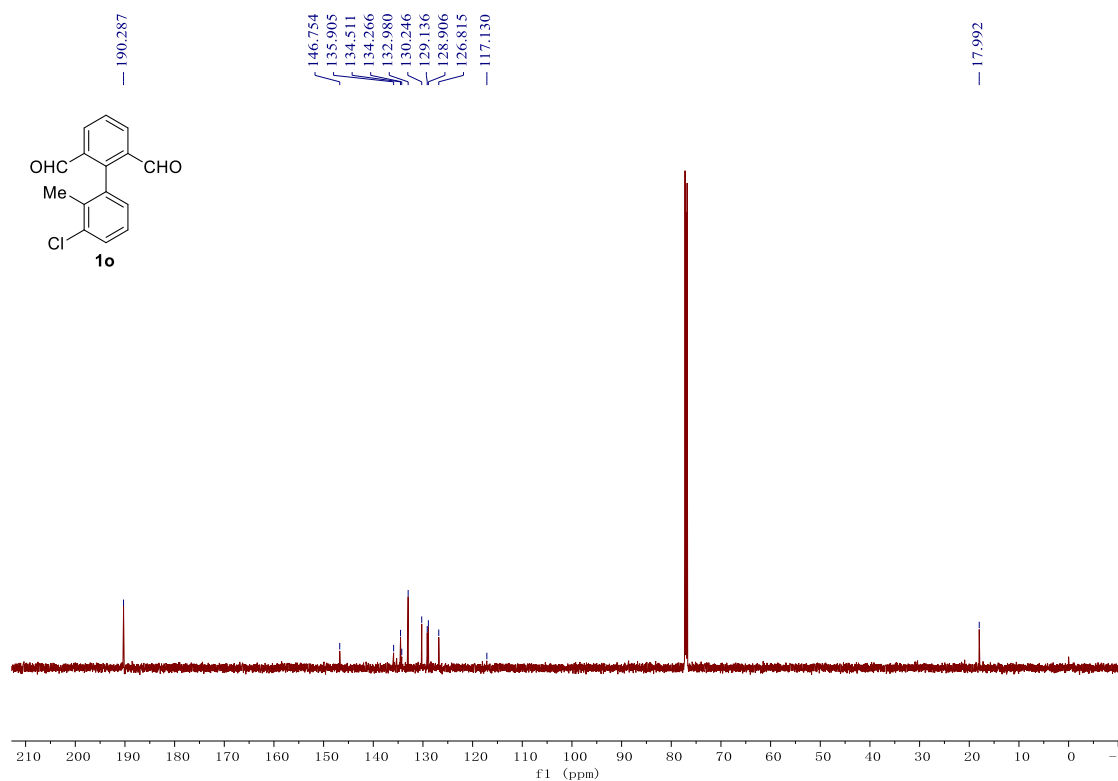

**<sup>13</sup>C NMR (150 MHz, CDCl<sub>3</sub>) spectrum of **1o**.**

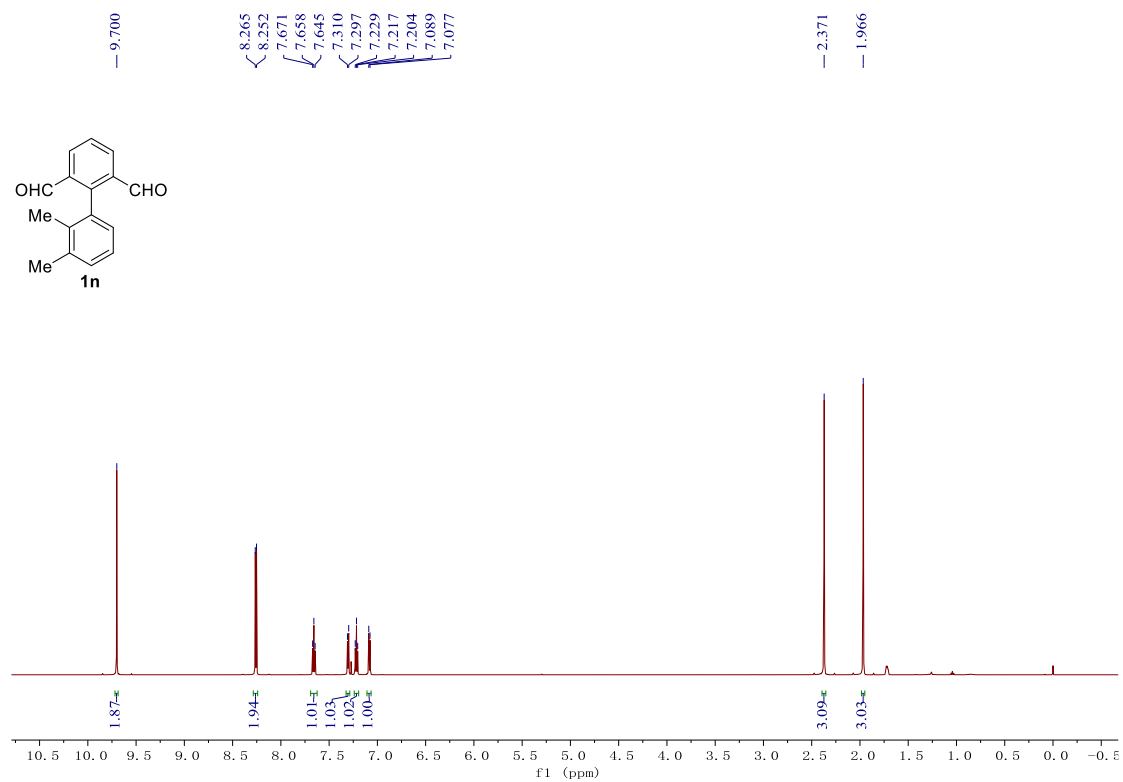

<sup>1</sup>H NMR (600 MHz, CDCl<sub>3</sub>) spectrum of **1n**.

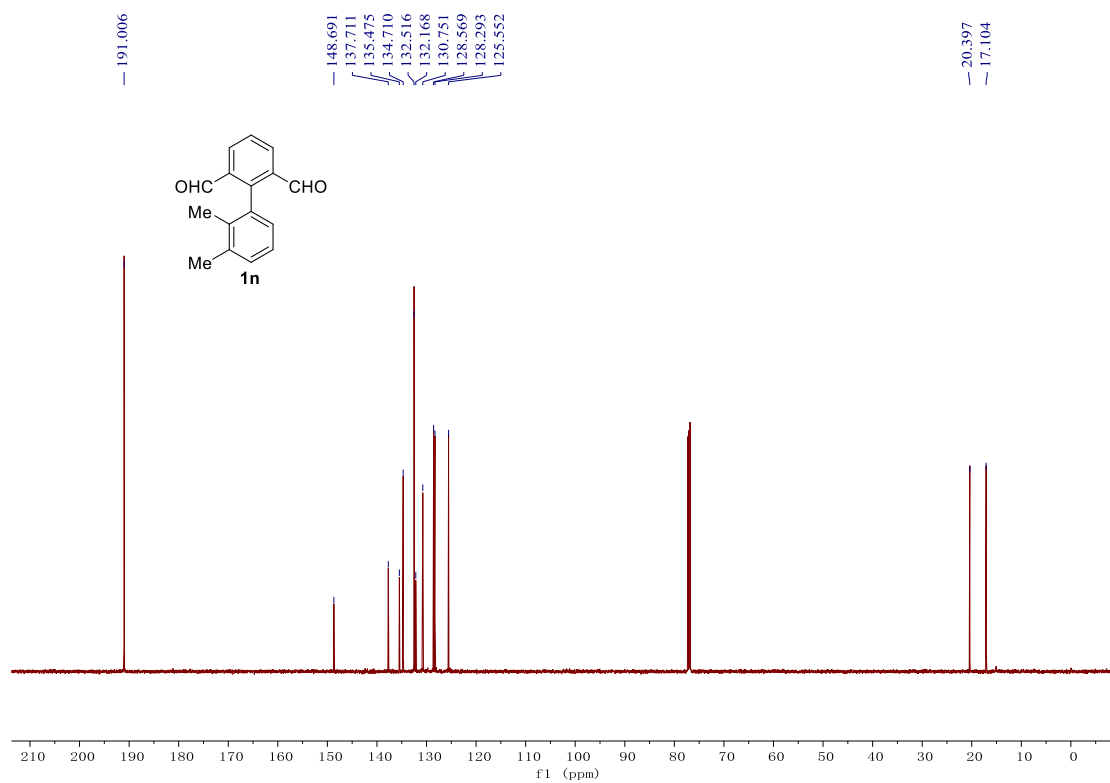

<sup>13</sup>C NMR (150 MHz, CDCl<sub>3</sub>) spectrum of **1n**.

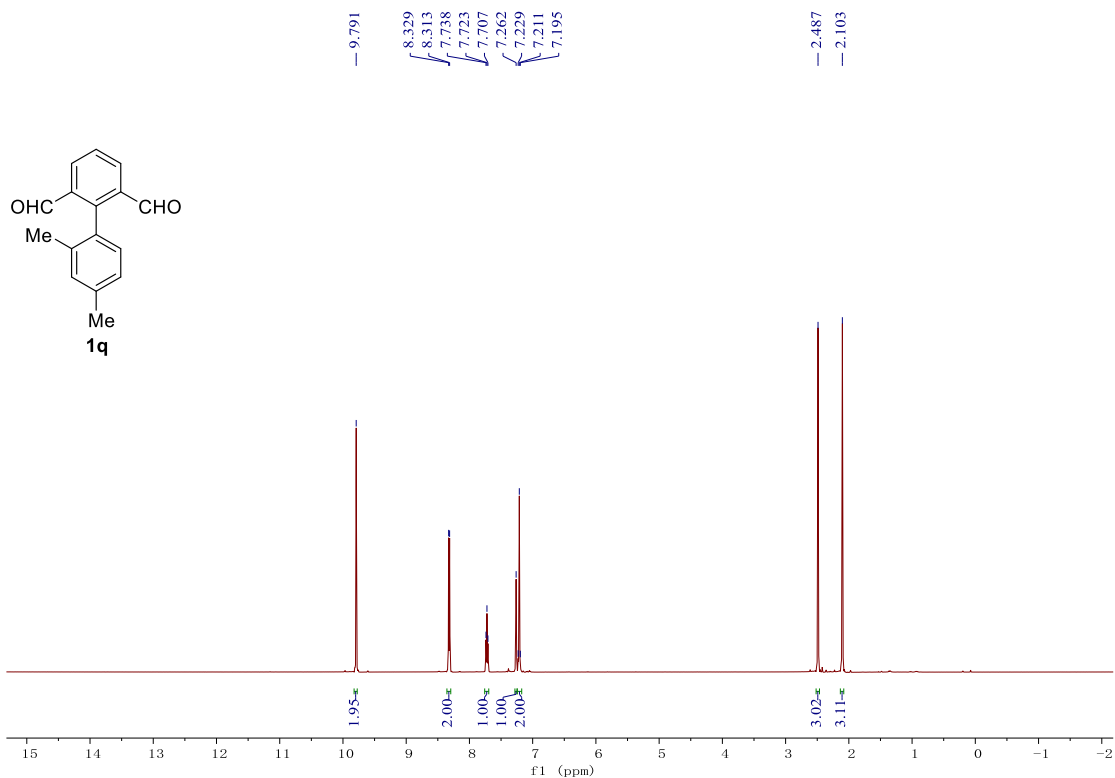

**<sup>1</sup>H NMR (500 MHz, CDCl<sub>3</sub>) spectrum of 1q.**

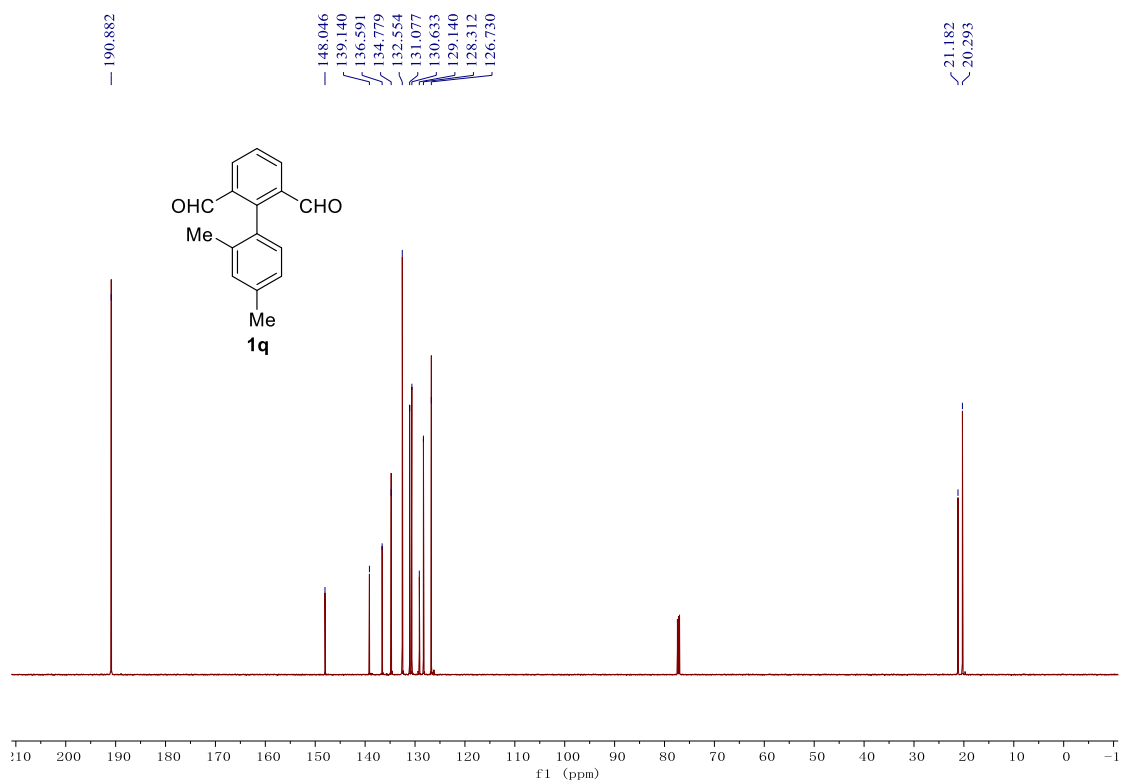

**<sup>13</sup>C NMR (150 MHz, CDCl<sub>3</sub>) spectrum of 1q.**

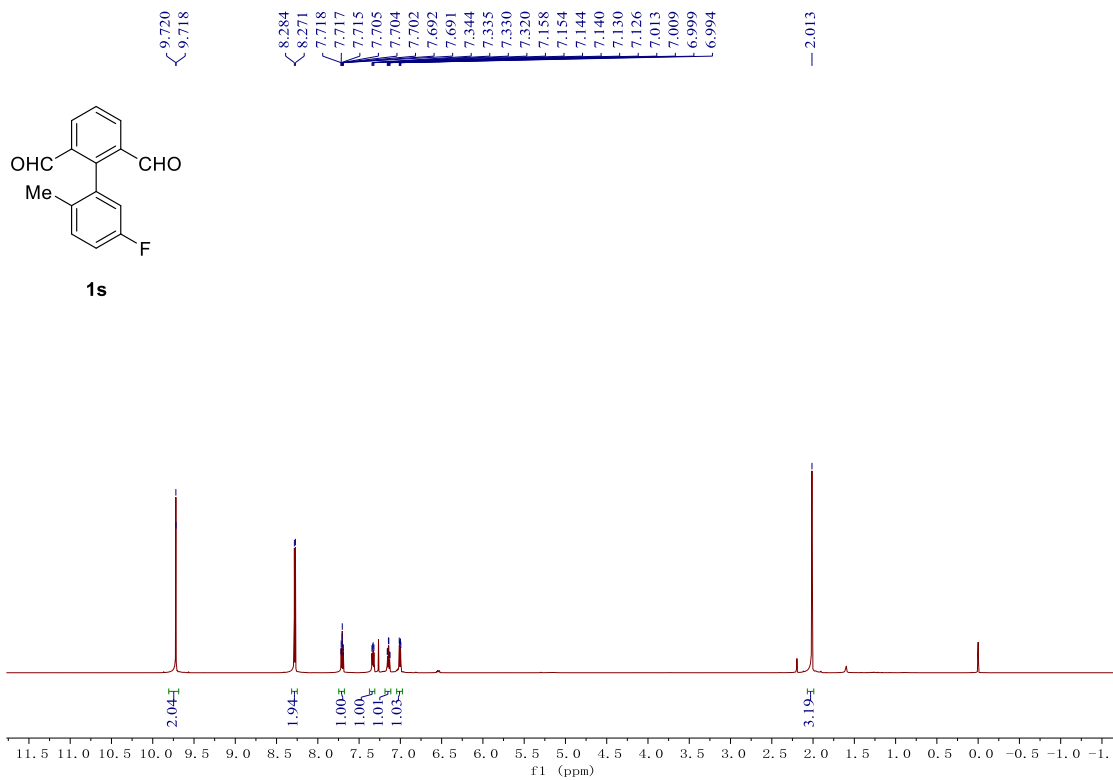

**<sup>1</sup>H NMR (600 MHz, CDCl<sub>3</sub>) spectrum of **1s**.**

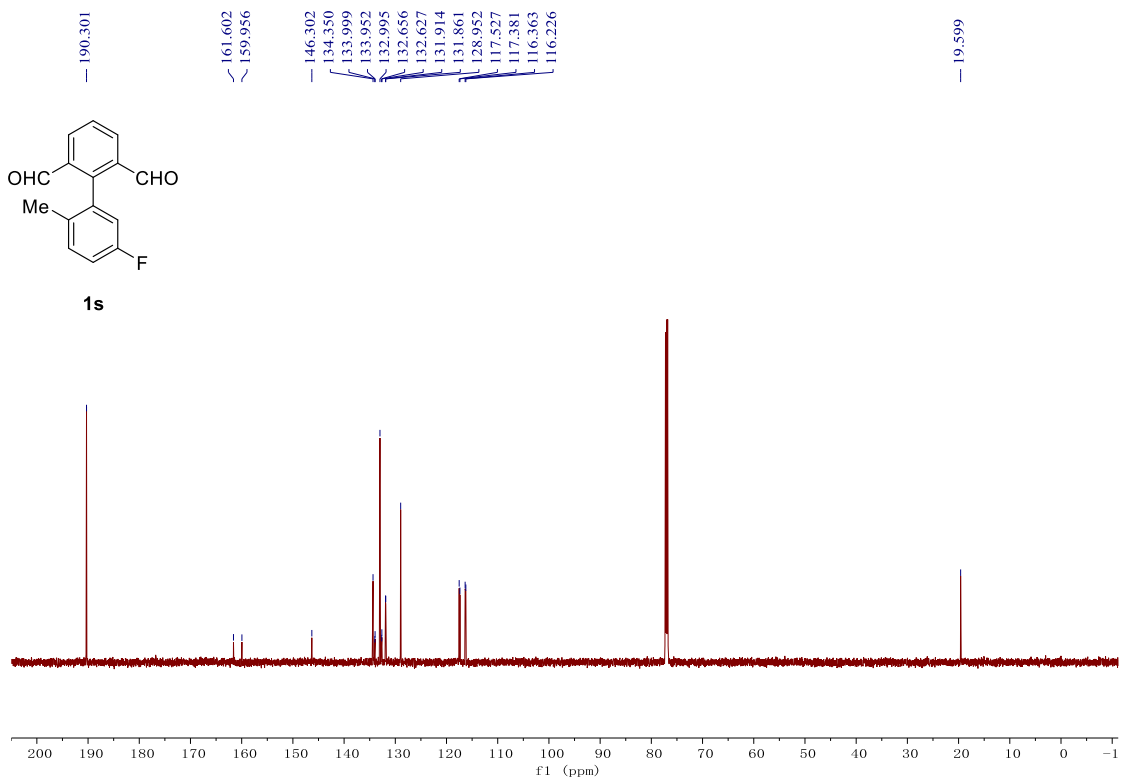

**<sup>13</sup>C NMR (150 MHz, CDCl<sub>3</sub>) spectrum of **1s**.**



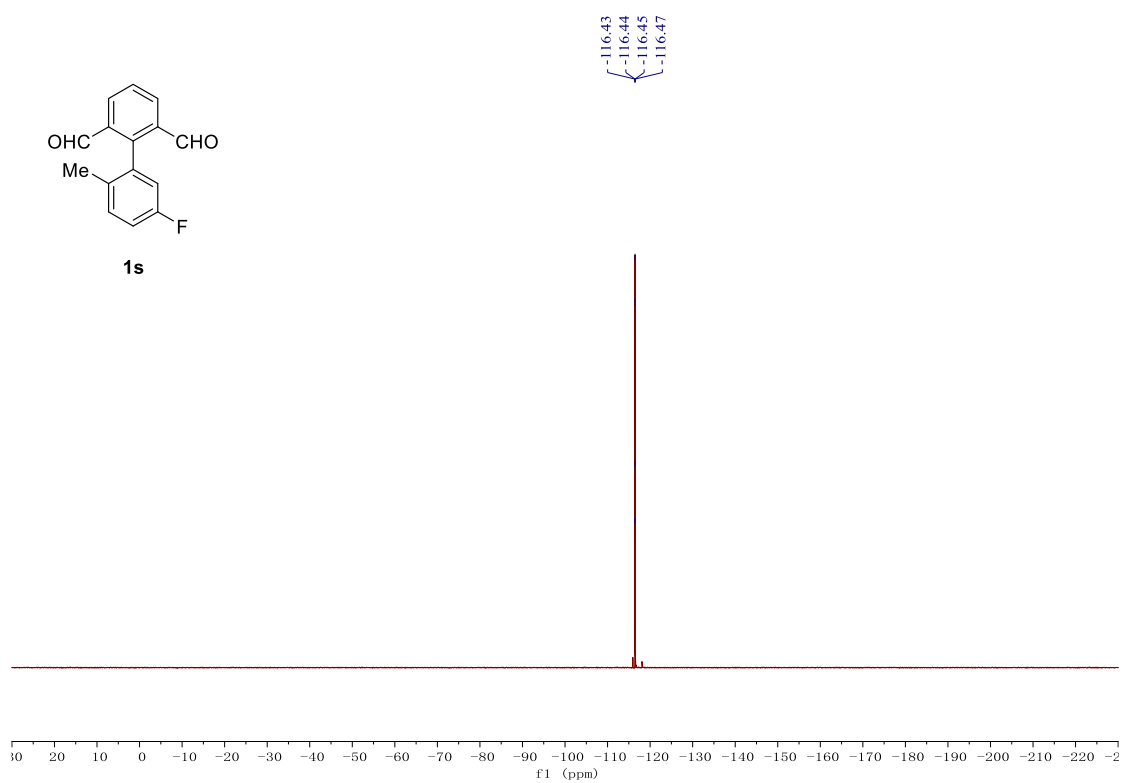

**$^{19}\text{F}$  NMR (565 MHz,  $\text{CDCl}_3$ ) spectrum of **1s**.**

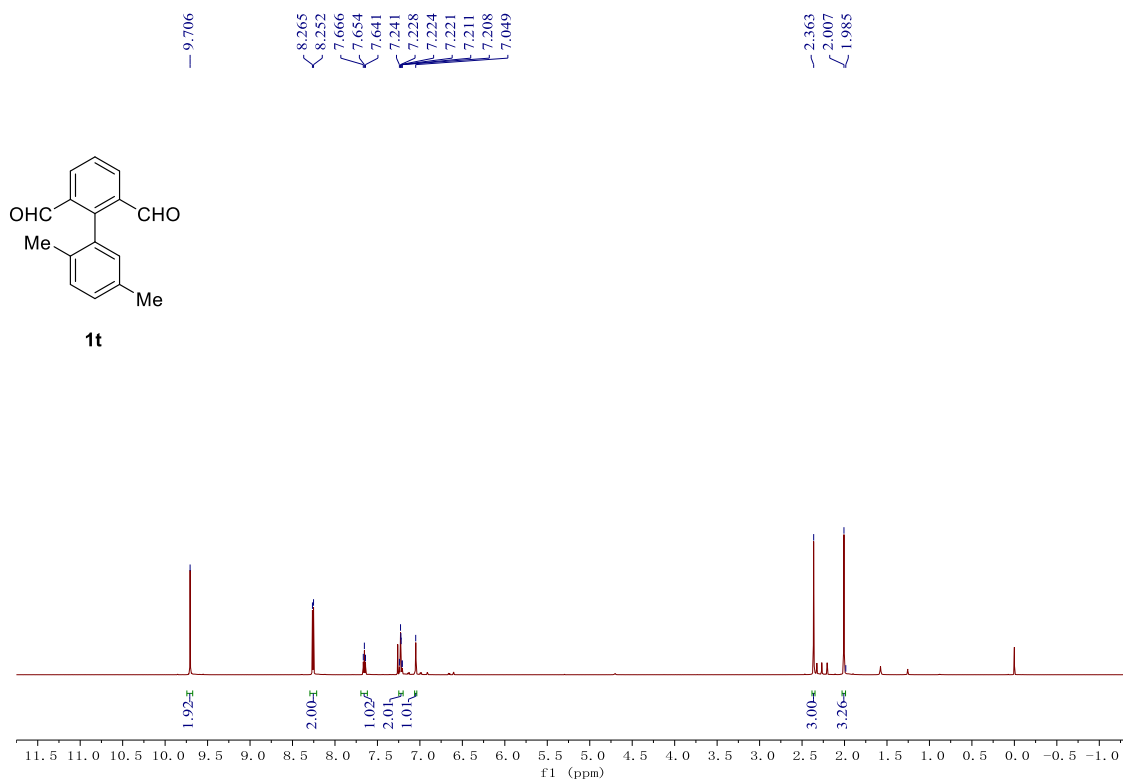

**<sup>1</sup>H NMR (600 MHz, CDCl<sub>3</sub>) spectrum of 1t.**

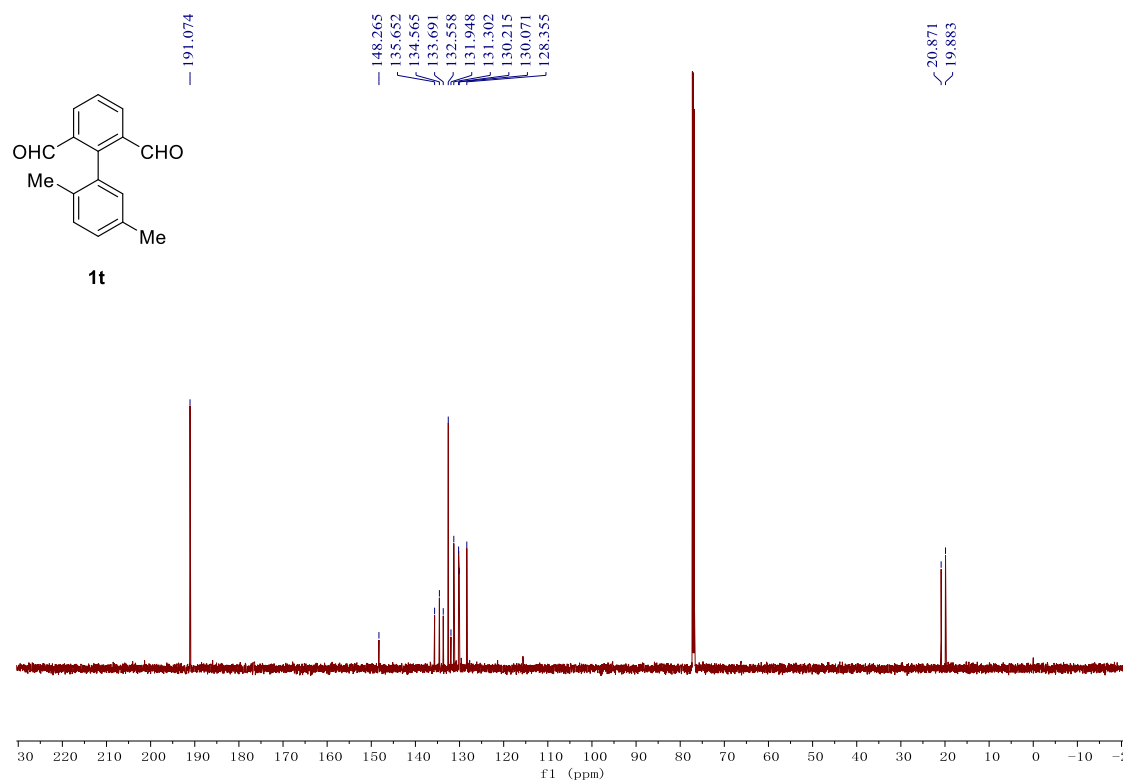

**<sup>13</sup>C NMR (150 MHz, CDCl<sub>3</sub>) spectrum of 1t.**

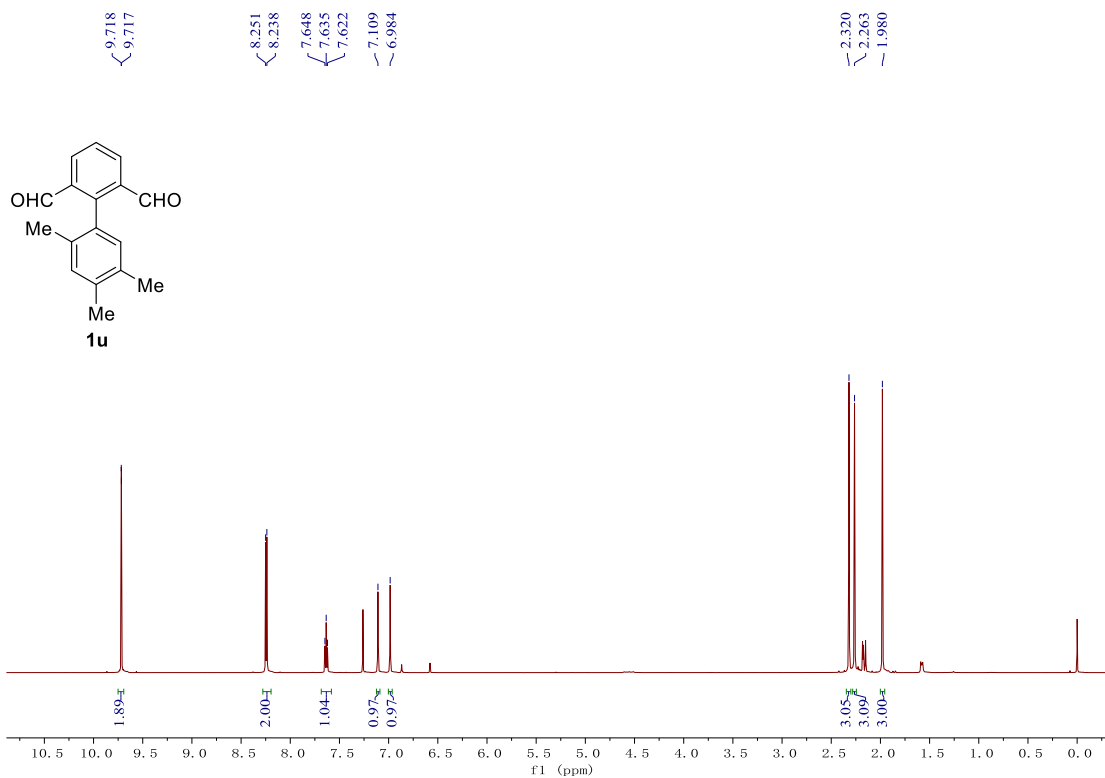

$^1\text{H}$  NMR (600 MHz,  $\text{CDCl}_3$ ) spectrum of **1u**.

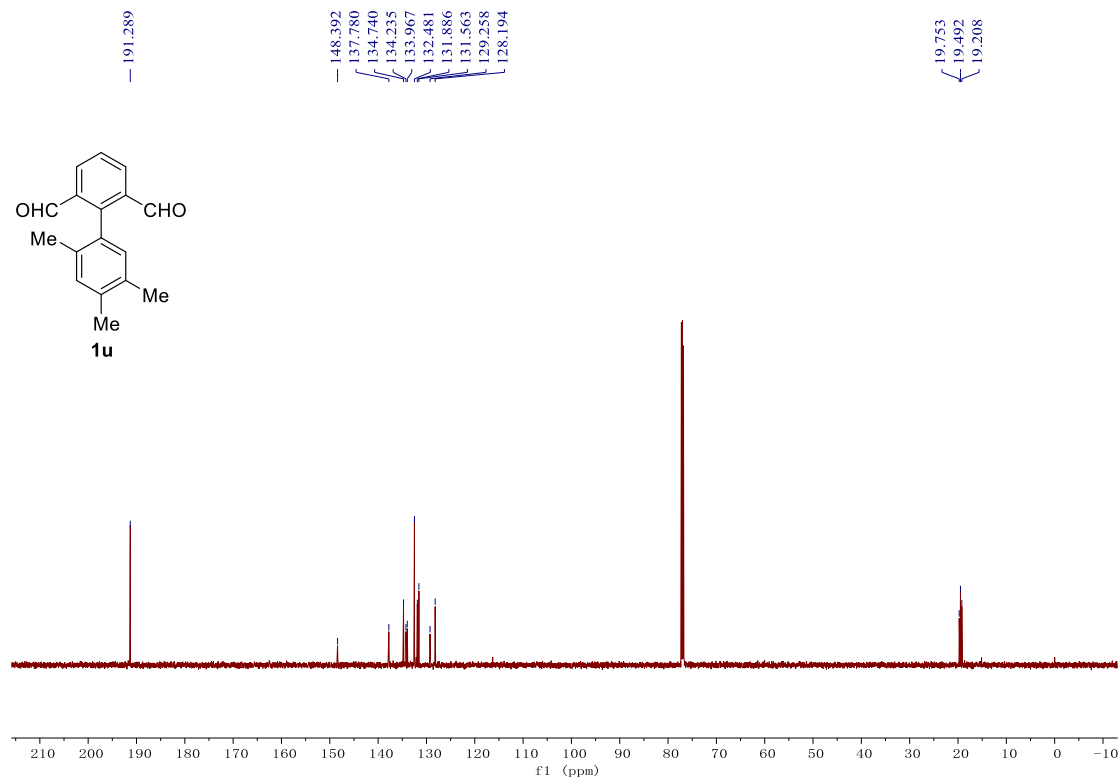

$^{13}\text{C}$  NMR (150 MHz,  $\text{CDCl}_3$ ) spectrum of **1u**.

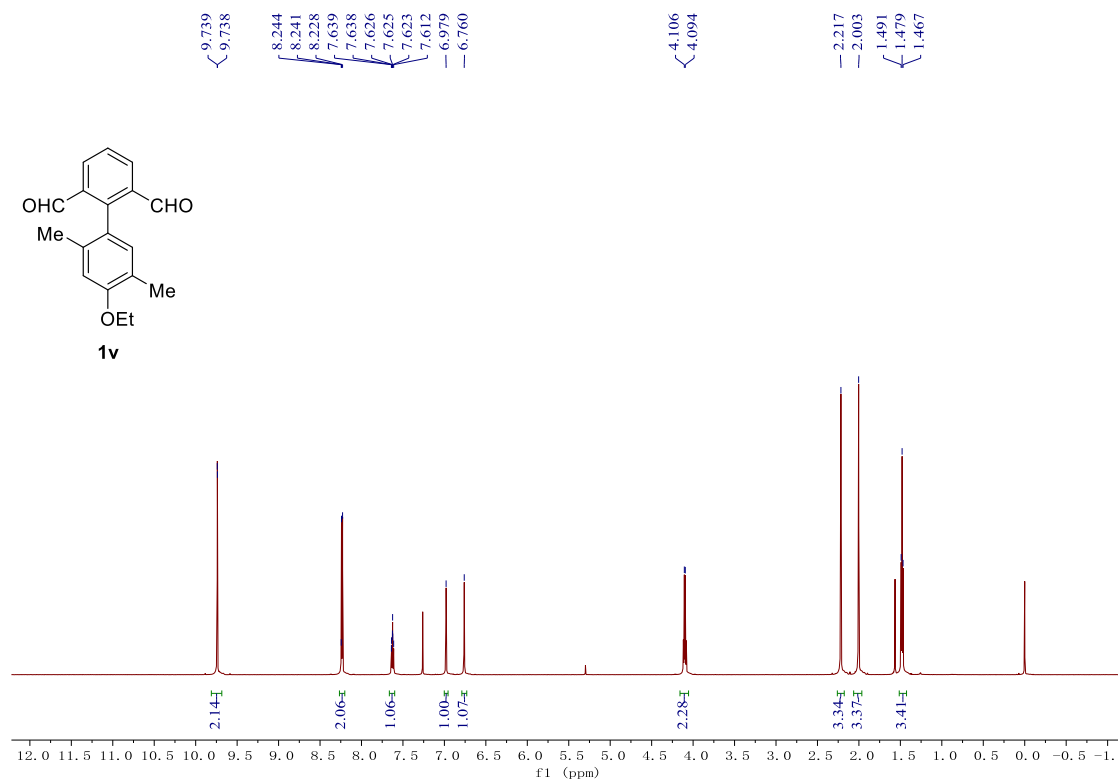

$^1\text{H}$  NMR (600 MHz,  $\text{CDCl}_3$ ) spectrum of **1v**.

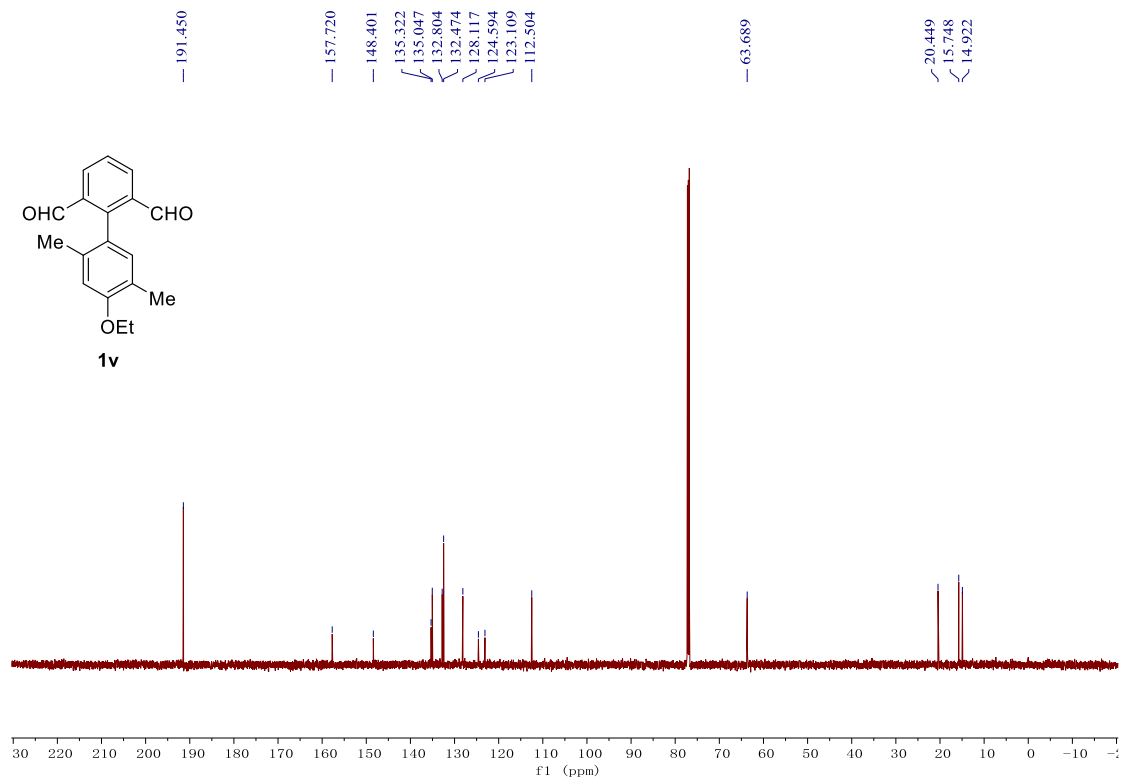

$^{13}\text{C}$  NMR (150 MHz,  $\text{CDCl}_3$ ) spectrum of **1v**.

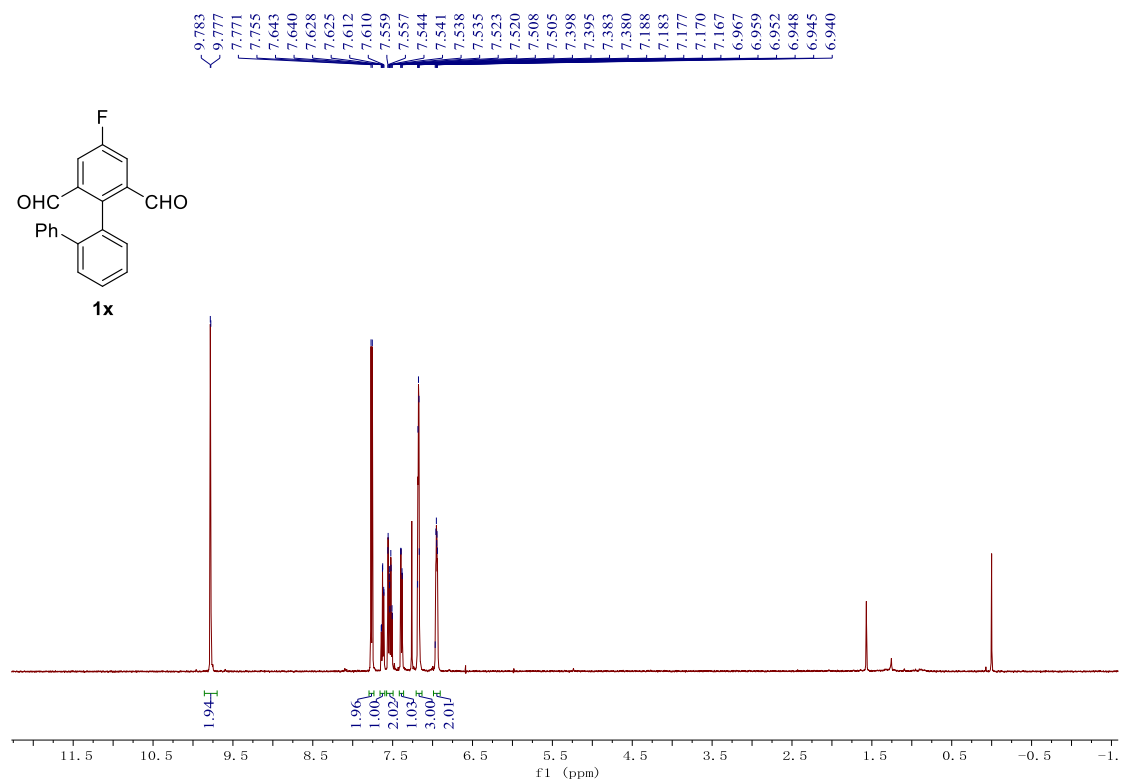

**<sup>1</sup>H NMR (500 MHz, CDCl<sub>3</sub>) spectrum of 1x.**

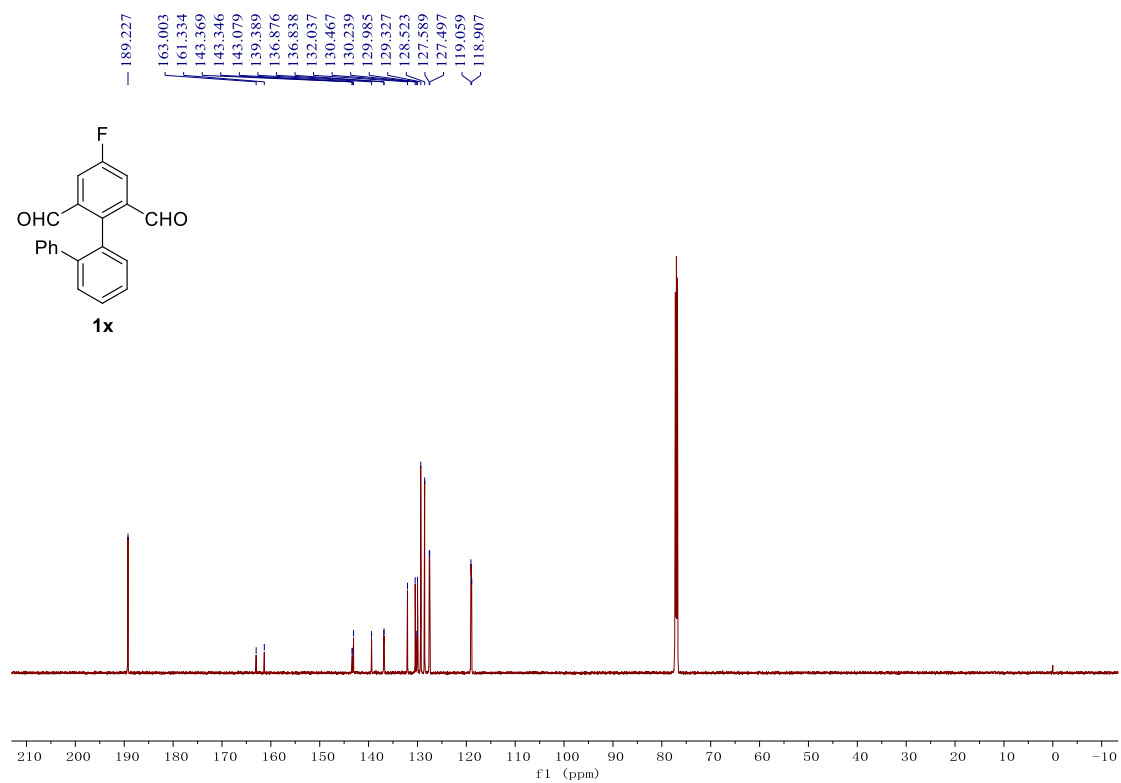

**<sup>13</sup>C NMR (150 MHz, CDCl<sub>3</sub>) spectrum of 1x.**

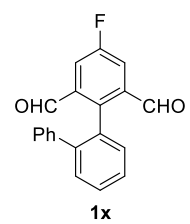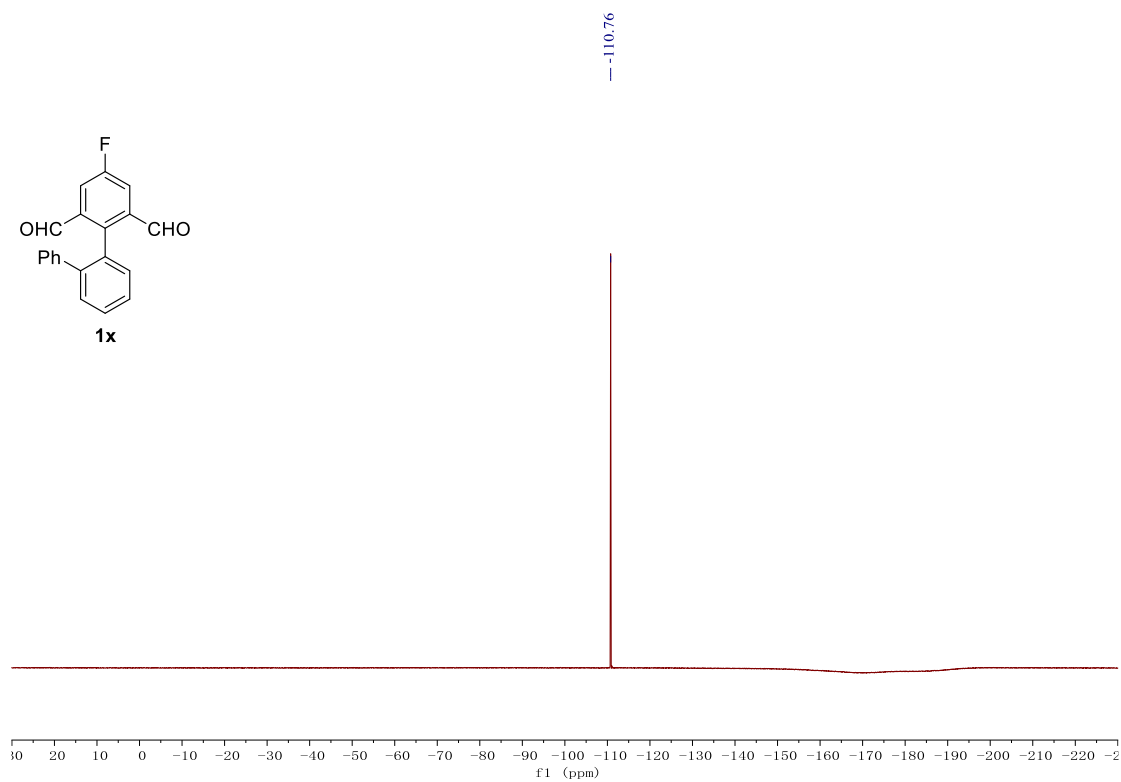

**<sup>19</sup>F NMR (565 MHz, CDCl<sub>3</sub>) spectrum of 1x.**

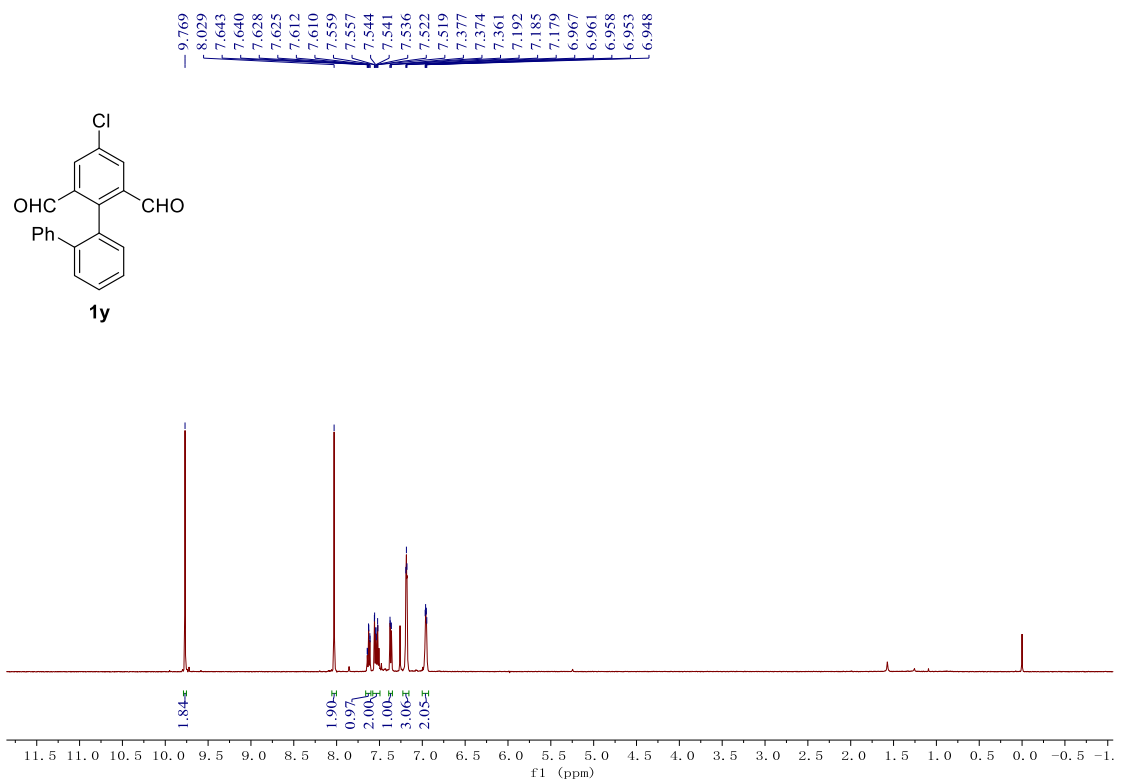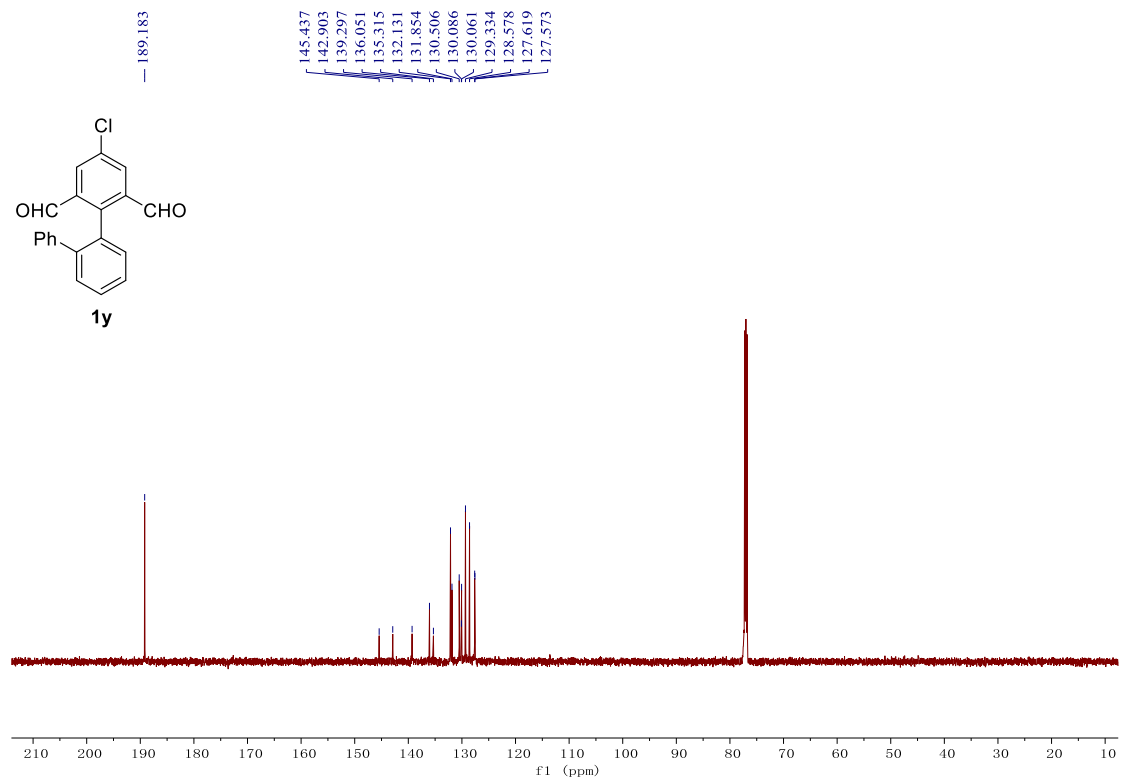

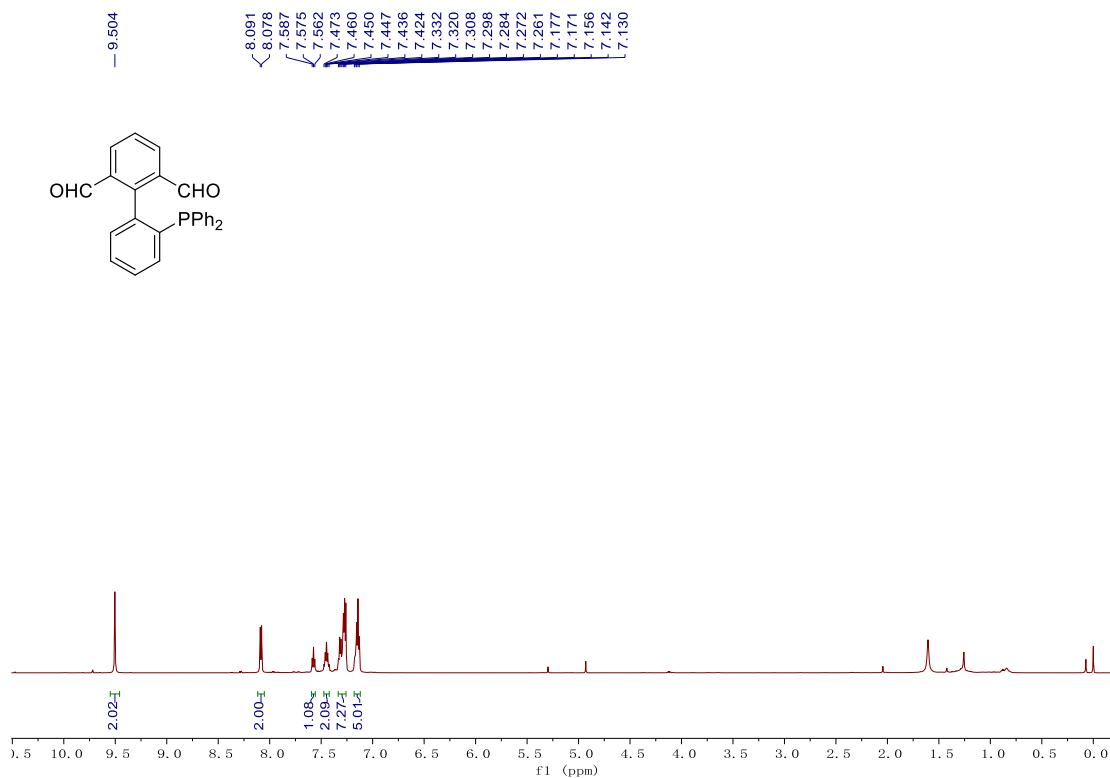

<sup>1</sup>H NMR (600 MHz, CDCl<sub>3</sub>) spectrum of 1a'.

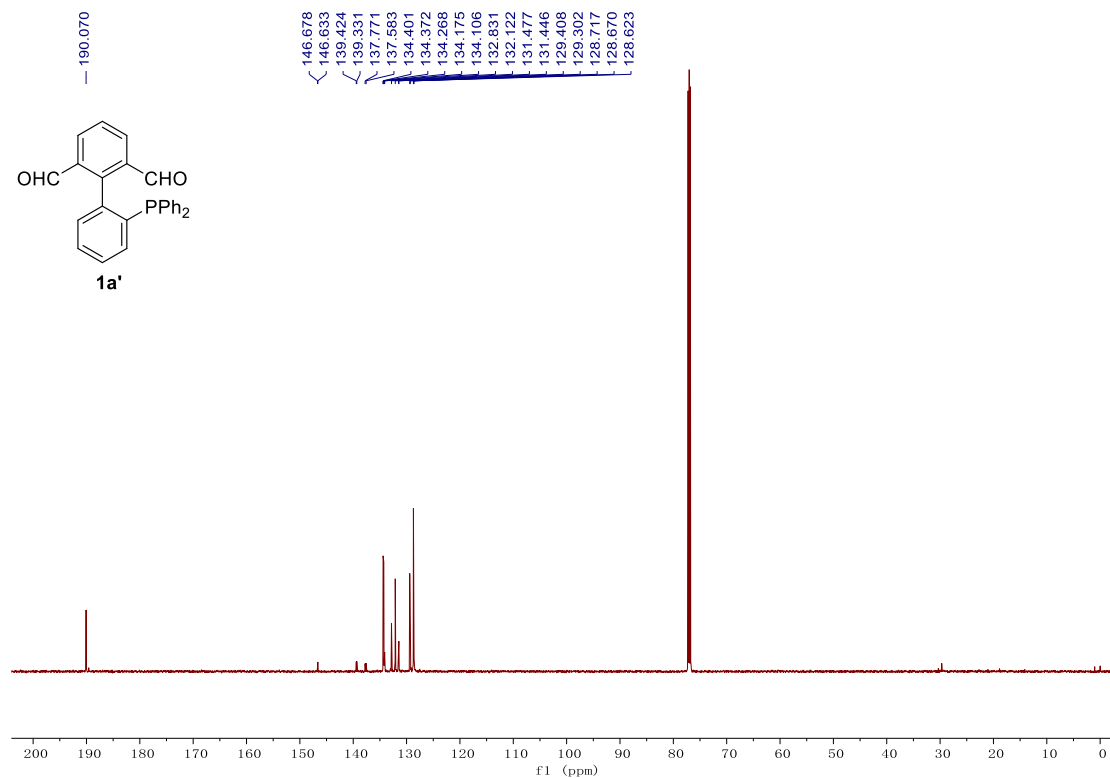

<sup>13</sup>C NMR (150 MHz, CDCl<sub>3</sub>) spectrum of 1a'.



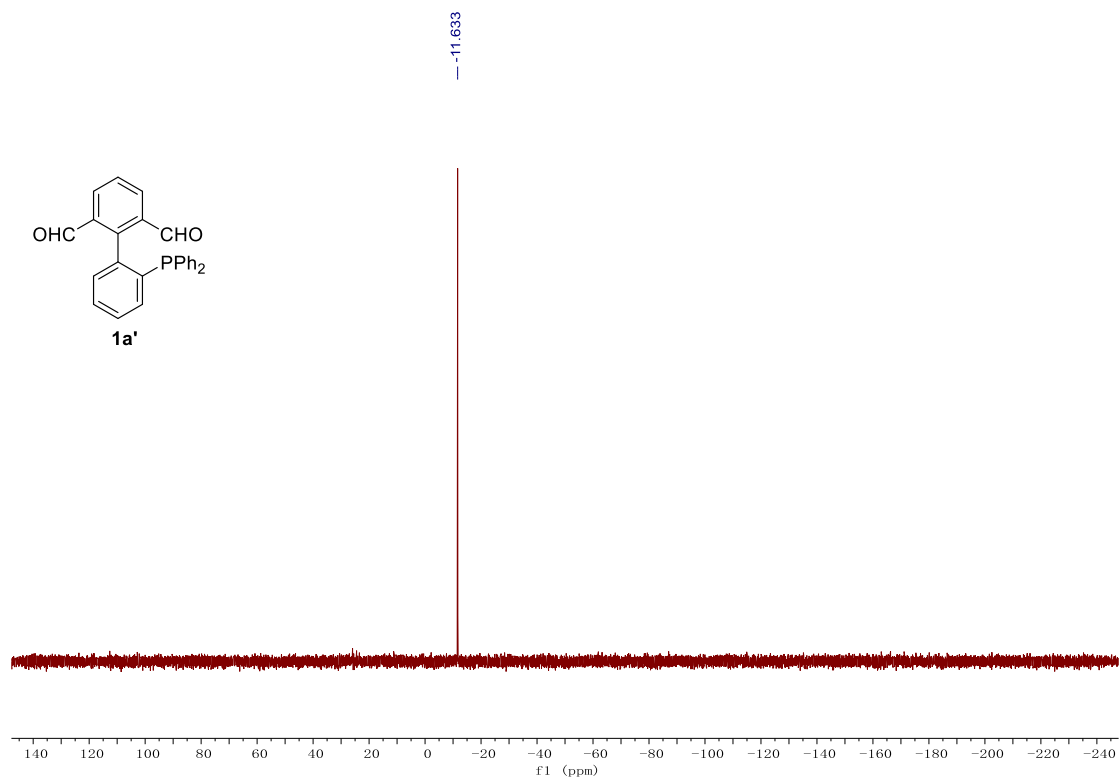

**<sup>31</sup>P NMR (243 MHz, Chloroform-*d*) spectrum of 1a'.**
